# Supplementary material for: Effects of five types of selenium supplementation for treatment of Kashin-Beck disease in children: a systematic review and network meta-analysis
Source: PubMed Central journal article supplement — BMJ Open. 2018 Mar 6;8(3):e017883. doi: 10.1136/bmjopen-2017-017883 (PMC5855457; doi:10.1136/bmjopen-2017-017883), 2018-03-06
Supplement: bmjopen-2017-017883.draft_revisions.pdf [file bmjopen-2017-017883.draft_revisions.pdf]

# BMJ Open

BMJ Open is committed to open peer review. As part of this commitment we make the peer review history of every article we publish publicly available.

When an article is published we post the peer reviewers' comments and the authors' responses online. We also post the versions of the paper that were used during peer review. These are the versions that the peer review comments apply to.

The versions of the paper that follow are the versions that were submitted during the peer review process. They are not the versions of record or the final published versions. They should not be cited or distributed as the published version of this manuscript.

BMJ Open is an open access journal and the full, final, typeset and author-corrected version of record of the manuscript is available on our site with no access controls, subscription charges or pay-per-view fees (<http://bmjopen.bmj.com>).

If you have any questions on BMJ Open's open peer review process please email [info.bmjopen@bmj.com](mailto:info.bmjopen@bmj.com)

# BMJ Open

## Effects of Five Types of Selenium Supplementation for Treatment of Kashin-Beck disease in children: A Systematic Review and Network Meta-analysis

|                                 |                                                                                                                                                                                                                                                                                                                                                                                                              |
|---------------------------------|--------------------------------------------------------------------------------------------------------------------------------------------------------------------------------------------------------------------------------------------------------------------------------------------------------------------------------------------------------------------------------------------------------------|
| Journal:                        | <i>BMJ Open</i>                                                                                                                                                                                                                                                                                                                                                                                              |
| Manuscript ID                   | bmjopen-2017-017883                                                                                                                                                                                                                                                                                                                                                                                          |
| Article Type:                   | Research                                                                                                                                                                                                                                                                                                                                                                                                     |
| Date Submitted by the Author:   | 22-May-2017                                                                                                                                                                                                                                                                                                                                                                                                  |
| Complete List of Authors:       | Xie, Dongmei; West China Hospital, Sichuan University, Department of Geriatrics<br>Liao, Yulin<br>Yue, Jirong; West China Hospital, Sichuan University, Department of Geriatrics<br>Zhang, Chao; Taihe Hospital, Hubei University of Medicine, Center for Evidence-based Medicine and Clinical Research<br>Wang, Yanyan; West China Hospital, Sichuan University, Geriatrics<br>Deng, Chuanyao<br>Chen, Ling |
| <b>Primary Subject Heading</b>: | Evidence based practice                                                                                                                                                                                                                                                                                                                                                                                      |
| Secondary Subject Heading:      | Complementary medicine                                                                                                                                                                                                                                                                                                                                                                                       |
| Keywords:                       | Kashin-Beck disease, Selenium supplementation, Network meta-analysis, Randomized controlled trial                                                                                                                                                                                                                                                                                                            |
|                                 |                                                                                                                                                                                                                                                                                                                                                                                                              |

SCHOLARONE™  
Manuscripts

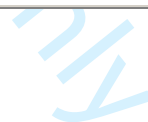

1  
2  
3  
4  
5  
6  
7  
8  
9  
10  
11  
12  
13  
14  
15  
16  
17  
18  
19  
20  
21  
22  
23  
24  
25  
26  
27  
28  
29  
30  
31  
32  
33  
34  
35  
36  
37  
38  
39  
40  
41  
42  
43  
44  
45  
46  
47  
48  
49  
50  
51  
52  
53  
54  
55  
56  
57  
58  
59  
60

1 **Effects of Five Types of Selenium Supplementation for Treatment**  
2 **of Kashin-Beck disease in children: A Systematic Review and**  
3 **Network Meta-analysis**

4 **Running title: Selenium Supplementation for Treatment of KBD**

5 Dongmei Xie, Yulin Liao, Jirong Yue, Chao Zhang, Yanyan Wang, Chuanyao Deng, Ling  
6 Chen

7  
8 **Dongmei Xie BS<sup>a</sup>**

9 Department of Geriatrics , West China Hospital, Sichuan University  
10 No. 37, Guo Xue Xiang, Chengdu, Sichuan, CHINA

11  
12 **Yulin Liao MD<sup>a</sup>**

13 Department of Geriatrics , West China Hospital, Sichuan University  
14 No. 37, Guo Xue Xiang, Chengdu, Sichuan, CHINA

15  
16 **Jirong Yue, MD (corresponding author)<sup>b</sup>**

17 Department of Geriatrics , West China Hospital, Sichuan University  
18 No. 37, Guo Xue Xiang, Chengdu, Sichuan, CHINA

19 Email: [yuejirong11@hotmail.com](mailto:yuejirong11@hotmail.com)

20  
21 **Chao Zhang, MD (corresponding author)<sup>b</sup>**

22 Center for Evidence-Based Medicine and Clinical Research, Taihe Hospital  
23 Hubei University of Medicine, Shiyan 442000, Hubei Province, China

24 Email: [zhangchao0803@126.com](mailto:zhangchao0803@126.com).

25  
26 **Yanyan Wang PHD**

27 Department of Geriatrics , West China Hospital, Sichuan University  
28 No. 37, Guo Xue Xiang, Chengdu, Sichuan, CHINA

1  
2  
3  
4 29  
5

6 30 **Chuanyao Deng BS**

7  
8 31 Department of Geriatrics , West China Hospital, Sichuan University

9 32 No. 37, Guo Xue Xiang, Chengdu, Sichuan, CHINA

10  
11 33

12  
13 34 **Ling Chen BS**

14 35 Department of Geriatrics , West China Hospital, Sichuan University

15 36 No. 37, Guo Xue Xiang, Chengdu, Sichuan, CHINA

16  
17 37

18  
19 38 <sup>a</sup> Dongmei Xie and Yulin Liao contributed equally to this article as cofirst authors.

20  
21 39 <sup>b</sup> Jirong Yue and Chao Zhang contributed equally to this article as co-corresponding authors.

22  
23 40  
24  
25  
26  
27 41

28 42

29  
30 43

31  
32 44  
33  
34  
35

36 45  
37  
38  
39  
40  
41  
42  
43  
44  
45  
46  
47  
48  
49  
50  
51  
52  
53  
54  
55  
56  
57  
58  
59  
60

## Abstract

**Objective:** To compare the effectiveness of five kinds of selenium supplementation for the treatment of patients with Kashin-Beck disease (KBD), and rank these selenium supplementation based on their performance.

**Design:** Systematic review, conventional meta-analysis, and network meta-analysis. We searched for all publications between January 1, 1966 and October 31, 2016 using seven electronic databases. We used pairwise meta-analyses to estimate direct evidence from intervention-control trials and a network meta-analysis to combine direct and indirect evidence.

**Results:** A total of 15 randomized controlled trials involving 2931 patients were included. Network meta-analyses showed that: compared with placebo or no treatment groups, sodium selenite (OR 4.68, 95% credible interval (CrI): 2.99 - 7.34), selenium salt (OR 12.37, 95%CrI: 2.81 - 54.41), selenium enriched yeast (OR 5.81, 95% CrI: 1.70 - 19.89), combination of sodium selenite and vitamin E (OR 10.72, 95%CrI: 3.14 - 36.57), and combination of sodium selenite and vitamin C (OR 3.26, 95%CrI: 1.14 - 9.28) had higher metaphysis X-ray improvement. Ranking on efficacy indicated that selenium salt was ranked the most effective, followed by sodium selenite + vitamin E, selenium enriched yeast, sodium selenite and then sodium selenite + vitamin C.

**Conclusions:** Based on the results of network meta-analysis, all five types of selenium supplements are more effective than placebo or no treatment in promoting the repair of metaphysis impairment. The effect of selenium salt ranked most effective.

**Trial registration number:** CRD42016051874

**Keywords:** Kashin-Beck disease; Selenium supplementation; Network meta-analysis; Randomized controlled trial

**Strengths of this study:**

- The present NMA integrated evidence from direct and indirect comparisons.
- We comprehensively summarized all RCTs of selenium supplements for KBD.

**Potential limitations:**

- Despite our exhaustive search, only 15 RCTs conducted in China were included in this review. Some trials may have been published in local journals that were missed in our search.
- The age range of participants in our review was 2~16 years old.

## 78 **Introduction**

79 Kashin-Beck disease (KBD) is a chronic, disabling degenerative disease of the peripheral  
80 joints and spine<sup>1,2</sup>, mainly distributed in southeast Siberia, north Korea, and China<sup>3</sup>. KBD is  
81 prevalent in 377 counties of 14 provinces in China, with 0.64 million cases<sup>4</sup>. In China, pa-  
82 tients are mainly concentrated in the remote areas of the north-east (Hei Longjiang provinc-  
83 es), north-west (Gan Su, Shan Xi, and Qing Hai provinces), as well as the south-west (Si-  
84 chuan and Tibet provinces). KBD occurs in childhood and involves pathologic changes of  
85 metaphysis and epiphyseal plate, resulting in multiple symptoms in the growth and the articu-  
86 lar cartilages such as bony deformity, joints enlargement, growth retardation, and functional  
87 impairment in multiple joints. The resulting disability causes an important human and socio  
88 economic burden to both affected children and adults. Moreover, KBD can also cause dis-  
89 turbances in the cartilage metabolism, the lipid peroxidation, and sulfur and selenium metab-  
90 olism<sup>5,6</sup>. So far, only palliative measures exist for treatment of KBD because of the incom-  
91 plete ability of the cartilage to repair itself. Treatment strategies for symptomatic relief in-  
92 clude non-steroidal anti-inflammatory drugs<sup>7</sup>, sodium hyaluronate<sup>8</sup>, physical therapy<sup>9</sup>, and  
93 chondroitin sulfate combined with glucosamine<sup>10</sup>. Successful surgical treatments to correct  
94 joint defects have been reported by orthopaedists<sup>11,12</sup>.

95 In spite of etiology of KBD is multifactorial, one of the major environmental risk factors is  
96 selenium deficiency<sup>13</sup>. Since the 1970s, selenium supplements have been given in some high-  
97 ly endemic areas. A meta-analysis including five randomized control trials (RCTs) and 10  
98 non-RCTs demonstrated the benefits of selenium supplementation for the primary prevention  
99 of KBD in children<sup>14</sup>. And another systematic review suggested that sodium selenite (Se) was  
100 effective for the treatment of patients that are already affected with KBD<sup>15</sup>. Besides Se tablet,  
101 there are other selenium supplements used for treating KBD, including selenium salts (Se

1  
2  
3  
4 102 salt), selenium enriched yeast (Se-enriched yeast), the combination of sodium selenite with  
5  
6 103 vitamin E (Se + VE), and the combination of sodium selenite with vitamin C (Se + VC). At  
7  
8 104 the time of our study, there were few head-to-head comparisons of different types of seleni-  
9  
10 105 um supplement for treatment of KBD. In light of the significance of KBD and the need for  
11  
12 106 government policy makers and clinical care workers to know the effects of a set of alternative  
13  
14 107 options, we conducted a systematic review and network meta-analysis (NMA) to compare the  
15  
16 108 effectiveness of all types of selenium supplementation for the treatment of patients with  
17  
18 109 KBD, and rank these selenium supplementation based on their performance.  
19  
20  
21  
22  
23

## 24 111 **Method**

25  
26 112 A protocol for this systematic review was devised in accordance with the PRISMA guide-  
27  
28 113 lines and registered on PROSPERO, and the trial registration number was CRD42016051874.

### 30 114 *Search strategy*

31  
32 115 We searched, without language restrictions, for all publications between January 1, 1966  
33  
34 116 and March 31, 2017 using electronic databases, which included MEDLINE, EMBASE, The  
35  
36 117 Cochrane Central Register of Controlled Trials, The Cochrane Database of Systematic Re-  
37  
38 118 views, The Chinese Biomedical Database, Chinese National Knowledge Infrastructure, Chi-  
39  
40 119 nese Science and Technique Journals Database, and Wan Fang database. The MeSH word and  
41  
42 120 free word were used as follow: “Kashin-Beck disease”, “Kashin-Bek disease”, “big bone dis-  
43  
44 121 ease”, “endemic osteoarthritis”, “Urov disease” and “selenium”, “Sodium selenite”, and “Se”.  
45  
46 122 The Ovid search strategy was seen in Appendix box 1. Reference lists from published narra-  
47  
48 123 tive review articles and systematic reviews were reviewed to identify additional studies.  
49  
50

### 52 124 *Eligibility criteria*

53  
54 125 We included all randomized, controlled trials (RCTs) that used Se tablet and other types  
55  
56  
57  
58  
59  
60

1  
2  
3  
4 126 of selenium supplements including Se salt, Se enriched yeast, Se + VE, as well as Se + VC  
5  
6 127 for KBD patients. The control group included placebo or no treatment control, or other active  
7  
8 128 medicines. We excluded the following studies: (1) studies with small sample size (numbers of  
9  
10 129 patients less than 20 in each treatment group); (2) preventive studies; (3) studies without  
11  
12 130 available information of interest. Studies reporting mixed groups of participants (e.g., partici-  
13  
14 131 pants with and without KBD) were included only if the therapeutic effect data could be iden-  
15  
16 132 tified and extracted separately. Outcome of interest to this review was the repair rate of met-  
17  
18 133 aphyseal lesions on X-ray film. Typically, repair was defined as being cured basically or im-  
19  
20 134 proved significantly of metaphyseal lesions according to the latest judgment standard of X-  
21  
22 135 ray for treatment effect of KBD<sup>16</sup>.

#### 23 24 25 26 136 ***Data extraction and quality evaluation***

27  
28 137 Two authors (Y. L & D. X) independently screened all citations identified by the searches.  
29  
30 138 Full-text of potentially study was obtained and assessed according to the aforementioned in-  
31  
32 139 clusion criteria. The data extraction form included publication (first author, year of publica-  
33  
34 140 tion), demographics (sample size and age), interventions (dosage, route of administration, and  
35  
36 141 duration of treatment), the follow-up period, as well as outcomes. We extracted data to the  
37  
38 142 nearest 12 months to estimate the overall odds ratio (OR) because all the included RCTs re-  
39  
40 143 port this time point. Two reviewers independently evaluated the methodological quality of  
41  
42 144 individual study according the Cochrane risk-of-bias tool<sup>17</sup>. Any disagreements would be re-  
43  
44 145 solved by consulting a third author (J.Y).

#### 45 46 47 146 ***Statistical analysis***

48  
49 147 As the repair rate of metaphyseal lesions on X-ray film, the outcome of interest in this  
50  
51 148 text, was a discontinuous statistics, we calculated the OR and its 95% confidence intervals  
52  
53 149 (CI) as the effect estimates.



1  
2  
3  
4 150 Initially, we performed standard pairwise meta-analyses for all available direct compari-  
5  
6 151 sons in STATA. Statistical heterogeneity of treatment effects across studies was assessed by  
7  
8 152 the Cochran Q test, and the extent of between-study heterogeneity was quantified by  $I^2$ , of  
9  
10 153 which with a value greater than 50% indicates substantial heterogeneity.

11  
12  
13 154 Then we conducted network meta-analysis in STATA to determine comparative effective-  
14  
15 155 ness of each therapy by using the network command and self-programmed STATA routines  
16  
17 156 available at <http://www.mtm.uoi.gr>. We present estimates of treatment effects as odds ratios  
18  
19 157 and 95% central credible intervals (CrI). The credible interval shows the degree of uncertain-  
20  
21 158 ty around estimated treatment effects.

22  
23  
24 159 To evaluate consistency in the entire network, we used the ‘design-by-treatment’ model,  
25  
26 160 which was described by Higgins and colleagues, by using the network meta command in  
27  
28 161 STATA. This method accounts for different source of inconsistency that can occur when stud-  
29  
30 162 ies with different designs (two-arm trials vs. three-arm trials) give different results as well as  
31  
32 163 disagreement between direct and indirect evidence. We inferred about the presence of incon-  
33  
34 164 sistency from any source in the entire network based on a chi-square test, and a P value great-  
35  
36 165 er than 0.05 indicated that the direct and indirect comparisons in the network were consistent.

37  
38  
39 166 We also estimated the ranking probabilities for all treatments of being at each possible  
40  
41 167 rank. Rankings were obtained by using the surface under the cumulative ranking curve (SU-  
42  
43 168 CRA) values and mean ranks. SUCRA could be expressed as a percentage interpreted as the  
44  
45 169 percentage of effectiveness of a treatment that would be ranked first without uncertainty. To  
46  
47 170 derive these SUCRA values we used the ranking probabilities estimated from the mvmeta  
48  
49 171 command.

## 50 51 52 172 **Results**

### 53 54 173 *Systematic review*

1  
2  
3  
4 174 Initial searches yielded 1686 citations. Of these, 1625 duplicate or irrelevant records were  
5  
6 175 excluded and full-text articles of the remaining 61 studies were retrieved for further assess-  
7  
8 176 ment according to the inclusion criteria. A total of 15 studies<sup>18-32</sup> containing 2931 patient  
9  
10  
11 177 were included eventually in our meta-analysis (Fig 1).

12  
13 178 A total of seven interventions were evaluated: Se, Se salt, Se-enriched yeast, Se + VE, Se  
14  
15 179 + VC, VC, and placebo. Figure 2 shows the network of all treatment comparisons included in  
16  
17 180 this text. The age of participants range from 2 to 16 years old and the duration of follow-up  
18  
19 181 varied from 6 months to 36 months. The main characteristics of the included studies are simi-  
20  
21 182 lar, and the detailed characteristics are presented in the online supplementary Appendix table  
22  
23 183 1. All included trials were reported to be RCTs. The quality of included studies was overall  
24  
25 184 low (Appendix table 2).

26  
27  
28 185

### 29 30 186 ***Intervention-control pairwise meta-analyses***

31  
32 187 All RCTs reported repair rate of metaphyseal lesions on X-ray films. Follow-up durations  
33  
34 188 were of included RCTs were varied. We extracted data to the nearest 12 months to estimate  
35  
36 189 the overall OR. The pooled OR (random effects model) of X-ray improvement was in favor  
37  
38 190 of Se (OR 5.0, 95% CI: 3.21 - 7.78,  $P < 0.001$ ), Se salt (OR 7.6, 95% CI: 2.34 - 24.67,  $P =$   
39  
40 191  $0.001$ ), Se enriched yeast (OR 3.75, 95% CI: 1.76 - 8.20,  $P = 0.001$ ), and Se + VE (OR 11.05,  
41  
42 192 95% CI: 2.61 - 46.80,  $P = 0.03$ ) respectively, which indicated that repairing rate of metaph-  
43  
44 193 yseal lesions on X-ray films was significantly higher in these group than placebo (Fig 3). A  
45  
46 194 few RCTs reported direct comparisons among active interventions. The OR of X-ray im-  
47  
48 195 provement was significantly higher in Se salt group compared with Se + VC (OR 6.00, 95%  
49  
50 196 CI: 1.81 - 19.93,  $P=0.003$ ) and VC alone (OR 4.24, 95% CI: 1.39 - 12.90,  $P=0.011$ ). There  
51  
52 197 were no significant differences were noted in other active interventions comparisons (Fig 3).

198

### 199 ***Results of network meta-analyses and consistency test***

200 The pooled OR and 95% credible interval (CrI) of X-ray improvement for active treatment  
201 compared with placebo was 4.68 (2.99 to 7.34) for Se, 12.37 (2.81 to 54.41) for Se salt, 5.81  
202 (1.70 to 19.89) for Se enriched yeast, 10.72 (3.14 to 36.57) for Se + VE, and 3.26 (1.14 to  
203 9.28) for Se + VC respectively, which indicated a significant difference in efficacy. For the  
204 comparison between active treatments, no significant differences were found. More details of  
205 direct comparisons were presented in Table 1.

206 There was no inconsistency between direct and indirect evidences according to the design-  
207 by-treatment interaction model ( $P=0.88$ ), implying that direct and indirect evidence were  
208 mainly consistent (Fig 4). However, the results of the comparison of Se + VC and VC versus  
209 placebo showed some degree of inconsistency. Actually, the lower CrI for X-ray improve-  
210 ment were nearly equal to 1 (1.13 for Se + VC and 1.27 for VC), showing a trend to be coin-  
211 cide with direct results.

212 Table 2 displayed the distribution of probabilities for each treatment being ranked for  
213 their efficacy in KBD according the SUCRA values (Fig 5) and mean ranks.

214

## 215 **Discussion**

### 216 ***Principal findings***

217 Our network meta-analysis of all 15 available RCTs in 2931 patients with KBD showed that  
218 all five kinds of selenium supplementation (including Se, Se salt, Se enriched yeast, Se + VE,  
219 Se + VC) were superior to placebo/no treatment in repairing metaphyseal lesions. There was  
220 uncertainty around the difference between two active treatments. However, the probabilistic  
221 ranking of interventions showed that Se salt was ranked the most effective, followed by Se +

1  
2  
3  
4 222 VE, Se enriched yeast, Se and then Se + VC.  
5  
6

7 223

8 224 ***Relation to other studies***  
9

10 225 Studies have proposed that selenium deficiency is the underlying factor that predisposes  
11  
12 226 the target cells (chondrocytes) to oxidative stress from free-radical carriers<sup>33</sup>. In most highly  
13  
14 227 endemic area, the level of total soil selenium concentrations is typically low. A meta-analysis  
15  
16 228 of the correlation between selenium and KBD reported that selenium levels in water, soil,  
17  
18 229 cereal, and corn in endemic regions were lower than regions without high rates of KBD<sup>35</sup>.  
19  
20 230 Furthermore, most of the inhabitants living in areas with KBD have a low selenium nutritive  
21  
22 231 status, which is reflected by low selenium contents in their blood serum, red blood cell, urine,  
23  
24 232 and hair.  
25  
26

27  
28 233 The effectiveness of various methods of selenium supplementation for children has been  
29  
30 234 demonstrated by many studies including Se salt<sup>37</sup>, Se enriched yeast<sup>24</sup>, oral sodium selenite  
31  
32 235 tablet<sup>15</sup>, spraying Se on crops<sup>38</sup>, and Se enriched fertilizer<sup>39</sup>. Selenium supplementation was  
33  
34 236 associated with a simultaneous decrease in the prevalence of KBD, along with an increased  
35  
36 237 selenium content in the hair of inhabitants living in areas with KBD. It was reported that the  
37  
38 238 incidence of radiographic evidence of metaphysical lesions of the hands was 44.8% in 1990  
39  
40 239 at Cuimu town of the Shaanxi province in children aged 7~12 years. After implementation of  
41  
42 240 comprehensive prevention measures of KBD, especially using Se salt, the incidence these x-  
43  
44 241 ray findings decreased to 0.3% in 2010<sup>40</sup>. The low incidence of KBD also may explain why  
45  
46 242 there has not been any studies about Se treatment for KBD published in recent years.  
47  
48

49 243 Se salt was produced by adding 0.833 g of sodium selenite powder into every 50 kg of  
50  
51 244 source salt and then expanding it to 1:60,000 Se salt. In our study, the probabilistic ranking of  
52  
53 245 interventions showed that Se salt was ranked the most effective. This result was not surpris-  
54  
55  
56  
57  
58  
59  
60

1  
2  
3  
4 246 ing because of the high compliance for salt intake. Although administration of Se tablet is  
5  
6 247 effective for preventing and treating KBD in children<sup>14,15</sup>, it is very difficult for millions of  
7  
8 248 children living in endemic areas to adhere to a long-term medication. However, salt is a nec-  
9  
10 249 essary part of daily life and food intake. The compliance can be more effectively guaranteed.

11  
12  
13 250 A limitation to the findings about Se salt is that due to the difficulty of carrying out a  
14  
15 251 RCT comparing Se salt with placebo or other active drugs, only one RCT has been done<sup>29</sup>.  
16  
17 252 However, one meta-analysis involving 11 non-RCTs (2652 participants) also showed that  
18  
19 253 supplement Se salt was effective for preventing and treatment for KBD in Children<sup>37</sup>. Since  
20  
21 254 Se salt is the most economical way for low-income families, it is anticipated that continuous  
22  
23 255 use of Se salt and other comprehensive prevention measures may help to eliminate the KBD  
24  
25 256 cartilage damages in Children<sup>41</sup>.

26  
27  
28 257 Despite the evidence in our meta-analysis, there remains some controversy around sele-  
29  
30 258 nium supplementation in relationship with iodine deficiency. In a cross sectional study in Ti-  
31  
32 259 bet area, Moreno-Reyes and his colleges found no association between individual selenium  
33  
34 260 status and KBD, whereas iodine deficiency was a risk factor<sup>42</sup>. Similarly, the only RCT<sup>30</sup>  
35  
36 261 published in English in our NMA showed only 1 case of improvements in X-ray in sodium  
37  
38 262 selenite group. The negative findings of the above studies should, however, be interpreted  
39  
40 263 with caution. These studies were all conducted in Tibet where selenium and iodine are both  
41  
42 264 deficient in the diet. Selenium and iodine deficiency are both risk factors of KBD<sup>33</sup>. In animal  
43  
44 265 experiments, growth retardation was observed in rats fed with a low selenium diet<sup>43</sup>, and im-  
45  
46 266 paired bone development was observed with an iodine deficient diet<sup>44</sup>. We do not exclude the  
47  
48 267 possibility that selenium supplementation may not counterbalance the negative effects of  
49  
50 268 long-term iodine deficiency. So KBD seems unlikely to be due to only one cause. Other ge-  
51  
52 269 netic and environmental factors may confer either a relatively protective effect or accelerate  
53  
54  
55  
56  
57  
58  
59  
60

1  
2  
3  
4 270 the disease.  
5

6 271 ***Strengths and weaknesses***  
7

8 272 The present NMA integrated evidence from direct and indirect comparisons. Conse-  
9  
10 273 quently, estimates in our analysis were more precise than the pairwise meta-analyses. The  
11  
12 274 literature search strategy was extensive, which makes it unlikely that we missed any relevant  
13  
14 275 trial. Trial selection and data extraction including quality assessments were done inde-  
15  
16 276 pendently by two authors to minimize bias and transcription errors. In this NMA, we com-  
17  
18 277 prehensively summarized all RCTs of selenium supplements for treatment of KBD.  
19  
20

21 278 Potential limitations to this review exist. First, the sample sizes of our included RCTs  
22  
23 279 were all small. Sample size calculations were not mentioned in any of the studies. Second,  
24  
25 280 despite our exhaustive search, only 15 RCTs conducted in China were included in this review.  
26  
27 281 North Korea and Russia also have a high incidence of KBD; some trials may have been pub-  
28  
29 282 lished in local journals that were missed in our search. Third, the age range of participants in  
30  
31 283 our review was 2~16 years old. Therefore, the effectiveness of selenium supplementation for  
32  
33 284 adults cannot be estimated. Finally, the heterogeneity in this meta-analysis was somewhat  
34  
35 285 high, which could be explained by a lack of concealment of allocation, failure to perform an  
36  
37 286 ITT analysis, small sample sizes of the studies included and differences between different  
38  
39 287 preparations of selenium. As with heterogeneity between trials, inconsistency between direct  
40  
41 288 and indirect comparisons was also near zero. Although we cannot rule out clinically relevant  
42  
43 289 inconsistency, we have no indication that clinical characteristics of included patients or other  
44  
45 290 trial characteristics confounded the indirect comparisons.  
46  
47  
48

49 291 **Conclusions**  
50

51  
52 292 ***Implications for practice***  
53

54 293 Based on this NMA, it appears that all types of Se supplementation were more effective  
55  
56  
57  
58  
59  
60

1  
2  
3  
4 294 than placebo or no treatment control groups for the treatment of KBD in children. Ranking on  
5  
6 295 efficacy indicated that Se salt were highest, followed by Se + VE, Se enriched yeast, Se, Se +  
7  
8 296 VC, VC, and placebo/no treatment. Nevertheless, the evidence may be limited by potential  
9  
10  
11 297 biases.

### 12 298 ***Implications for research***

13  
14  
15 299 Since KBD among children has almost disappeared, we believe it unlikely that future tri-  
16  
17 300 als will involve a RCT to demonstrate the clinically relevant benefit of any selenium supple-  
18  
19 301 mentation for children with KBD. At present, there are no effective clinical measures to re-  
20  
21 302 pair the cartilage damage of KBD in adults. Tissue engineering and gene therapy approaches  
22  
23 303 may become the potential treatment strategy that can applied to the treatment of the KBD car-  
24  
25 304 tilage damages.

26  
27  
28 305

### 29 306 **Contributors**

30  
31  
32 307 Xie Dongmei and Liao Yulin conceived the review question, reviewed studies for inclusion,  
33  
34 308 assessed the included studies, extracted data, completed the first draft, and edited the review.  
35  
36 309 Yue Jirong and Zhang Chao analysed the data, did the literature search, advised and coordi-  
37  
38 310 nated the review development, performed part of the writing and editing of the review, ap-  
39  
40 311 proved the final version of the review prior to submission, and is also a guarantor. Yanyan  
41  
42 312 Wang, Chuanyao Deng and Ling Chen contributed to the development of the review ques-  
43  
44 313 tion, edited and provided intellectual contributions to the review.  
45  
46  
47  
48  
49

314

### 50 315 **Conflict of interest**

51  
52 316 We declare that we have no conflicts of interest.

### 53 54 317 **Role of the funding source**

1  
2  
3  
4 318 The sponsors of the study had no role in study design, data collection, data analysis, data in-  
5  
6 319 terpretation, or writing of the report. The corresponding author had full access to all the data  
7  
8 320 in the study and had final responsibility for the decision to submit for publication.  
9

### 10 321 **Acknowledgments**

11  
12 322 This research was funded by China National Science & Technology Pillar Program during the  
13  
14 323 eleventh 5-year plan period (2007BA125B04).

15  
16  
17 324 Dr. Joseph H. Flaherty is especially acknowledged for editorial review and language assis-  
18  
19 325 tance.  
20

### 21 326 **Reference:**

- 22  
23 327  
24  
25 328
- 26 329 1. Mathieu F, Begaux F, Lan ZY, Suetens C, Hinsenkamp M. Clinical manifestations of  
27  
28 330 Kashin-Beck disease in Nyemo Valley, Tibet. *Int Orthop* 1997;21:151-6.
  - 29  
30 331 2. Sokoloff L. The history of Kashin-Beck disease. *N Y State J Med* 1989;89:343-51.
  - 31  
32 332 3. Allander E. Kashin-Beck disease. An analysis of research and public health activities  
33  
34 333 based on a bibliography 1849-1992. *Scand J Rheumatol Suppl* 1994;99:1-36.
  - 35  
36 334 4. P. R. C. Ministry of Health. The prevention and control status of Kashin-Beck disease  
37  
38 335 in 2011. Available at:  
39 336 <http://www.nhfpc.gov.cn/htmlfiles/zwgkzt/ptjnj/year2012/index2012.html;2012>.
  - 40  
41 337 5. Xiong G. Diagnostic, clinical and radiological characteristics of Kashin-Beck disease  
42  
43 338 in Shaanxi Province, PR China. *Int Orthop* 2001;25:147-50.
  - 44  
45 339 6. Peng A, Yang C, Rui H, Li H. Study on the pathogenic factors of Kashin-Beck dis-  
46  
47 340 ease. *J Toxicol Environ Health* 1992;35:79-90.
  - 48  
49 341 7. Luo R, Liu G, Liu W, Pei F, Zhou Z, Li J, et al. Efficacy of celecoxib, meloxicam and  
50  
51 342 paracetamol in elderly Kashin-Beck disease (KBD) patients. *International orthopaedics* 2011;35:1409-14.
  - 52  
53 343 8. Yu FF, Xia CT, Fang H, Han J, Younus MI, Guo X. Evaluation of the therapeutic ef-  
54  
55 344 fect of treatment with intra-articular hyaluronic acid in knees for Kashin-Beck dis-  
56  
57 345 ease: A meta-analysis. *Osteoarthritis Cartilage* 2014;22:718-25.  
58  
59 346



- 1  
2  
3  
4 347 9. Mathieu F, Suetens C, Begaux F, De Maertelaer V, Hinsenkamp M. Effects of physi-  
5 348 cal therapy on patients with Kashin-Beck disease in Tibet. *Int Orthop* 2001;25:191-3.  
6  
7 349 10. Yue J, Yang M, Yi S, Dong B, Li W, Yang Z, et al. Chondroitin sulfate and/or glu-  
8  
9 350 cosamine hydrochloride for Kashin-Beck disease: a cluster-randomized, placebo-  
10  
11 351 controlled study. *Osteoarthritis and cartilage* 2012;20:622-9.  
12  
13 352 11. Zhongmin T, Yang L, Zhou J, Gao D, Dong S, Xie J, et al. Comparison of treatment  
14  
15 353 results of arthroscopic knee debridement alone with a combination of arthroscopic  
16  
17 354 debridement and drilling decompression in knee Kaschin-Beck disease (in Chinese).  
18  
19 355 *Chin J Endo* 2009:371-4.  
20  
21 356 12. Liu FD, Wang ZL, Hinsenkamp M. Osteotomy at the knee for advanced cases of  
22  
23 357 Kashin-Beck disease. *Int Orthop* 1998;22:87-91.  
24  
25 358 13. Guo X, Ma WJ, Zhang F, Ren FL, Qu CJ, Lammi MJ. Recent advances in the re-  
26  
27 359 search of an endemic osteochondropathy in China: Kashin-Beck disease. *Osteoarthritis*  
28  
29 360 *Cartilage* 2014;22:1774-83.  
30  
31 361 14. Zou K, Liu G, Wu T, Du L. Selenium for preventing Kashin-Beck osteoarthropathy in  
32  
33 362 children: a meta-analysis. *Osteoarthritis Cartilage* 2009;17:144-51.  
34  
35 363 15. Jirong Y, Huiyun P, Zhongzhe Y, Birong D, Weimin L, Ming Y, et al. Sodium selenite  
36  
37 364 for treatment of Kashin-Beck disease in children: A systematic review of randomised  
38  
39 365 controlled trials. *Osteoarthritis and Cartilage* 2012;20:605-13.  
40  
41 366 16. Liang S, Zhang F, Wang L, Yang Y, Lu X, Chen C. The effect of the treatment of  
42  
43 367 Kaschin Beck disease (in Chinese). *Chin J Endo* 1996;15:378-80.  
44  
45 368 17. Higgins J, Green S. *Cochrane Handbook for Systematic Reviews of Interventions*  
46  
47 369 (Version 5.1.0). The Cochrane Collaboration, 2011. Available at:  
48  
49 370 <http://www.cochrane-handbook.org>.  
50  
51 371 18. Niu GH, Zhang BH, Song ZY, Pang ZG, Wang YY, Ma QH. An observation study on  
52  
53 372 effect of oral sodium selenite for prevention and treatment of kashin-beck effect (in  
54  
55 373 Chinese). *Heilongjiang Med J* 1981:15-7.  
56  
57 374 19. Disease TYSSGoK-B. Effect and mechanism of selenium in the prevention and cure  
58  
59 375 of 424 Kaschin-Beck's patients (in Chinese). *Chin J Endemiol* 1982;1:145-50.  
60  
376 20. Wang DS, Fu BS, Sun QY, Yang WZ, Bao BJ, Huang FH, et al. Dynamic observation  
377  
378 of sodium selenite and vitamin E in the treatment of Kashin Beck disease (in Chi-  
nese). *Chin J Endemiol* 1983;2:204-7.

- 1  
2  
3  
4 379 21. Cui ZJ, Lin BH, Jin CS, Lin JZ. An observation on effect of the treatment of Kaschin-  
5 380 Beck disease using Vitamin C or sodium selenite (in Chinese). *End Dis Bull*  
6 381 1984;1:63.
- 7  
8  
9 382 22. Niu GH, Zhang BZ, Li XZ, Liu JX, Zhu ZY, Hou SF. Results of study of two years on  
10 383 the preventing and controlling Kashin-Beck's disease with selenium seen under X-  
11 384 rays and discussion of etiology (in Chinese). *Chin J Endemiol* 1984;3:199-201.
- 12  
13  
14 385 23. Guo LB, Lu Q, Tang HF, Lei H, Dong HQ. An one year observation by X-ray on ef-  
15 386 fect of the treatment of Kaschin-Beck disease using oral sodium selenite (in Chinese).  
16 387 *J Chengde Univ Med Sci* 1985:67-70.
- 17  
18  
19 388 24. Guo LB, Lu Q, Dong HQ, Tang HF, Lei H, Zhang ZM, et al. One year of observation  
20 389 on effect of selenium enriched yeast for treatment of Kaschin Beck disease (in Chi-  
21 390 nese). *Chin J Endemiol* 1986;5:16-20.
- 22  
23  
24 391 25. Niu GH, Zhang BZ, Hou SF, Zhu ZY, Li DZ, Zhong PL, et al. Study of two years on  
25 392 the preventing and controlling Kashin-Beck's disease with oral sodium selenite seen  
26 393 under X-rays (in Chinese). *J Pract Endemio* 1986;1:16-8.
- 27  
28  
29 394 26. Wu QX. An observation by X-ray on effect of the prevention and treatment of  
30 395 Kaschin-Beck disease using oral sodium selenite (in Chinese). *Chin J Endemiol*  
31 396 1986;5:210-20.
- 32  
33  
34 397 27. Deng JY. Effect of sodium selenite oral application on Kashin-Beck disease, a three  
35 398 years observation (in Chinese). *Chin J Endemiol* 1988;7:117-20.
- 36  
37  
38 399 28. Niu GH, Zhang BZ, Hou SF. Effect of semis-dosage selenium on controlling of  
39 400 Kashin-Beck disease (in Chinese). *Chin J Endemiol* 1990:99-100.
- 40  
41  
42 401 29. Zhou XK, Wang WL, Wang EQ, Yu AL, Ren YG, Xu JM, et al. The observation on  
43 402 effecto of selenium and vitamin C for treating Kaschin Beck disease (in Chinese).  
44 403 *End Dis Bull* 1991:100-3.
- 45  
46  
47 404 30. Moreno-Reyes R, Mathieu F, Boelaert M, Begaux F, Suetens C, Rivera MT, et al. Se-  
48 405 lenium and iodine supplementation of rural Tibetan children affected by Kashin-Beck  
49 406 osteoarthropathy. *Am J Clin Nutr* 2003;78:137-44.
- 50  
51  
52 407 31. Chen Y, Huo JM, Wang ZL, Tan XW, Xue L, Geng D. A comparative research on the  
53 408 treatment effect of Se supplement , Vit C supplement and cereals dryness on Kaschin  
54 409 -Beck disease (in Chinese). *Chin J Endemiol* 2003;18:343-6.
- 55  
56  
57 410 32. Cai LW, Zhang YL. An observation by X-ray on effect of selenium in the treatment of

- 1  
2  
3  
4 411 40 Kaschin-Beck children (in Chinese). *J Comm Med* 2005;3:60-1.  
5  
6 412 33. Yao Y, Pei F, Kang P. Selenium, iodine, and the relation with Kashin-Beck disease.  
7 413 *Nutrition* 2011;27:1095-100.  
8  
9 414 34. Li S, Xiao T, Zheng B. Medical geology of arsenic, selenium and thallium in China.  
10 415 *Sci of the Tot Env* 2012;421-422:31-40.  
11  
12 416 35. Wang Q, Li XX, Li L, Tian JH, Yang KH, Wu TX, et al. Correlation between seleni-  
13 417 um and Kaschin-Beck disease: A meta-analysis (in Chinese). *Chin J Evid Based Med*  
14 418 2013;13:1421-30.  
15  
16  
17 419 36. Guo X, Zhang SY, Mo D. A role of low selenium in the occurrence of Kashin-Beck  
18 420 disease (in Chinese). *J Xi'an Jiaotong Univ* 1992:99-108.  
19  
20 421 37. Yu FF, Han J, Wang X, Fang H, Liu H, Guo X. Salt-Rich Selenium for Prevention and  
21 422 Control Children with Kashin-Beck Disease: a Meta-analysis of Community-Based  
22 423 Trial. *Biol Trace Elem Res* 2016;170:25-32.  
23  
24  
25 424 38. Guo X, Ding D, Wang Z, Lv S, Zhang J, Tan X, et al. A study on the reparative action  
26 425 of x-ray lesions in metaphyses and distal end of bone in children's fingers with  
27 426 kashin-beck disease treated by se-fortified wheat (in Chinese). *Chin J Ctrl Endem Dis*  
28 427 1990:269-72.  
29  
30  
31 428 39. Chen D, Ren S, Lu W, Li J, Fan L, Jia Z, et al. Effect of applying selenium fertilizer  
32 429 to improve soil and increase selenium level in food for prevention and treatment of  
33 430 Kaschin-Beck disease (in Chinese). *J Env Sci* 1993;5:299-309.  
34  
35  
36 431 40. Xu GY, Lu XY, Cao XG. Analysis on monitoring data of Kaschin-Beck disease in  
37 432 Shannxi Province during 19 years (in Chinese). *Chin J Contr End Dis* 2009:442-6.  
38  
39  
40 433 41. Ning Y, Wang X, Wang S, Zhang F, Zhang L, Lei Y, et al. Is it the appropriate time to  
41 434 stop applying selenium enriched salt in kashin-beck disease areas in China? *Nutrients*  
42 435 2015;7:6195-212.  
43  
44  
45 436 42. Moreno-Reyes R, Suetens C, Mathieu F, Begaux F, Zhu D, Rivera MT, et al. Kashin-  
46 437 Beck osteoarthropathy in rural Tibet in relation to selenium and iodine status. *N Engl*  
47 438 *J Med* 1998;339:1112-20.  
48  
49  
50 439 43. Sasaki S, Iwata H, Ishiguro N, Habuchi O, Miura T. Low-selenium diet, bone, and  
51 440 articular cartilage in rats. *Nutrition* 1994;10:538-43.  
52  
53 441 44. Goss AN, Sampson WJ, Townsend GC, McIntosh GH. Effect of iodine deficiency on  
54 442 craniofacial growth in young common marmosets (*Callithrix jacchus*). *J Craniofac*

1  
2  
3  
4 443 Genet Dev Biol 1988;8:225-33.  
5  
6 444  
7  
8  
9  
10  
11  
12  
13  
14  
15  
16  
17  
18  
19  
20  
21  
22  
23  
24  
25  
26  
27  
28  
29  
30  
31  
32  
33  
34  
35  
36  
37  
38  
39  
40  
41  
42  
43  
44  
45  
46  
47  
48  
49  
50  
51  
52  
53  
54  
55  
56  
57  
58  
59  
60

For peer review only

**Table 1 Results of network meta-analyses of repairing rate of metaphyseal lesions on X-ray films**

| <b>OR<br/>(95%CrI)<br/>#</b> | <b>Placebo</b>         | <b>Se</b>            | <b>Se salt</b>      | <b>Se + VC</b>       | <b>Se + VE</b>      | <b>Selenium yeast</b> |
|------------------------------|------------------------|----------------------|---------------------|----------------------|---------------------|-----------------------|
| <b>Se</b>                    | 4.68 (2.99 to 7.34)*   | -                    | -                   | -                    | -                   | -                     |
| <b>Se salt</b>               | 12.37 (2.81 to 54.41)* | 2.64 (0.59 to 11.84) | -                   | -                    | -                   | -                     |
| <b>Se + VC</b>               | 3.26 (1.14 to 9.28)*   | 0.70 (0.25 to 1.97)  | 0.26 (0.06 to 1.20) | -                    | -                   | -                     |
| <b>Se + VE</b>               | 10.72 (3.14 to 36.57)* | 2.29 (0.62 to 8.43)  | 0.87 (0.13 to 5.93) | 3.29 (0.65 to 16.53) | -                   | -                     |
| <b>Se yeast</b>              | 5.81 (1.70 to 19.89)*  | 1.24 (0.36 to 4.25)  | 0.47 (0.07 to 3.16) | 1.78 (0.37 to 8.66)  | 0.54 (0.10 to 3.08) | -                     |
| <b>VC</b>                    | 3.05 (1.29 to 7.20)*   | 0.65 (0.28 to 1.53)  | 0.25 (0.06 to 1.06) | 0.94 (0.34 to 2.56)  | 0.28 (0.06 to 1.27) | 0.52 (0.12 to 2.27)   |

# the treatment in the column on left compare with the treatment on the first line; \* P < 0.05  
 CrI = credible interval

**Table 2 Probabilistic ranking of effectiveness of different interventions.**

Se salt was ranked the most effective followed by Se+VE, Se-yeast, Se and then Se + VC. VC and placebo as a control was ranked the least effective.

| Interventions | Probabilistic ranking |            |          |
|---------------|-----------------------|------------|----------|
|               | SCURA (%)             | PrBest (%) | MeanRank |
| Se salt       | 86                    | 49.1       | 1.8      |
| Se+VE         | 82.8                  | 38.5       | 2        |
| Se yeast      | 62.5                  | 11.6       | 3.3      |
| Se            | 52.5                  | 0.2        | 3.9      |
| Se+VC         | 35.7                  | 0.4        | 4.9      |
| VC            | 30.1                  | 0.2        | 5.2      |
| Placebo       | 0.5                   | 0          | 7        |

SUCRA=surface under cumulative ranking

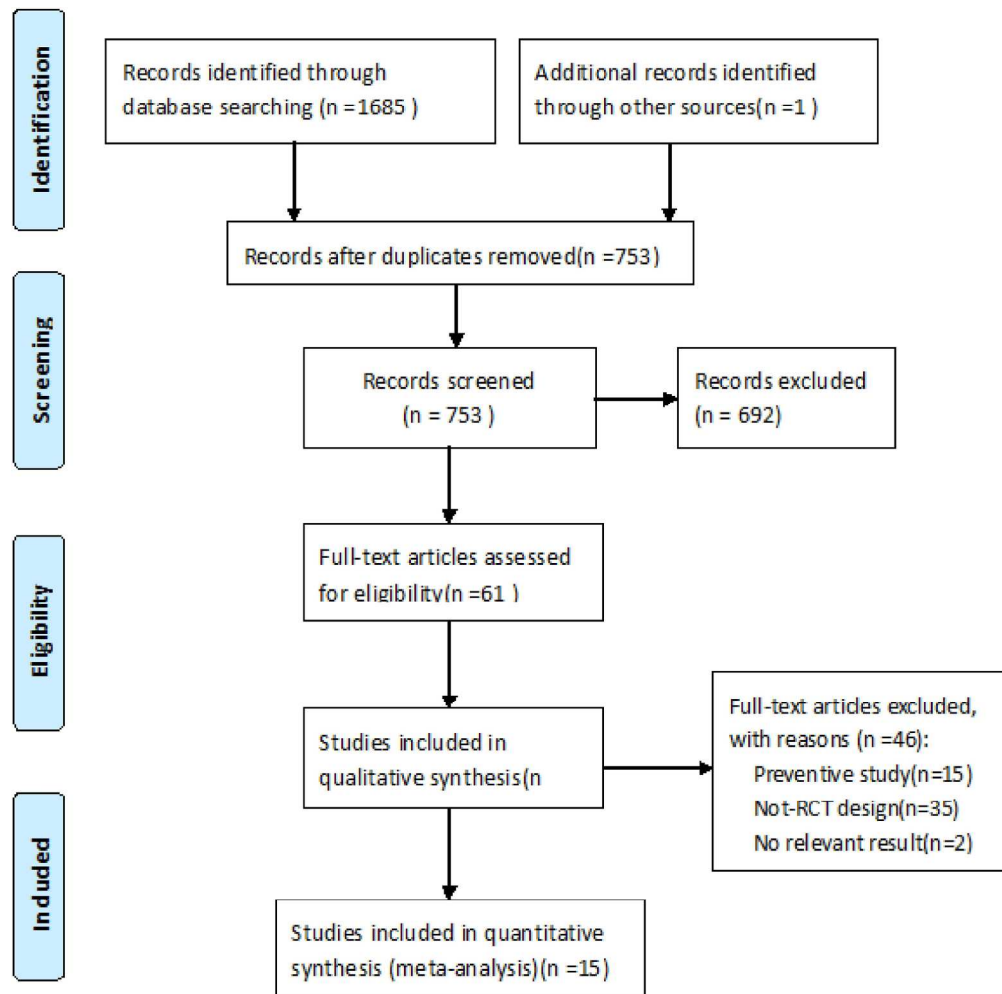

Fig 1 Flow diagram of included study

201x200mm (300 x 300 DPI)

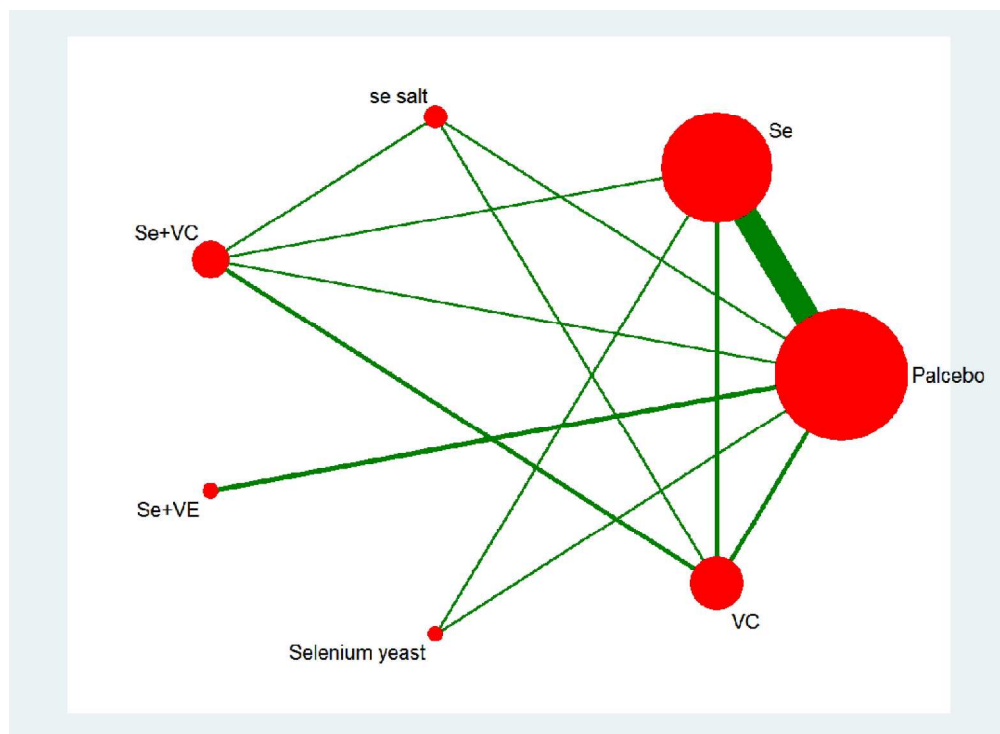

Fig 2 Network of eligible comparisons for treatment efficacy network meta-analysis for KBD. The width of lines is proportional to the number of studies compared in every pair of treatments, and the size of nodes is proportional to the total sample size of each treatment.

277x201mm (300 x 300 DPI)

view only



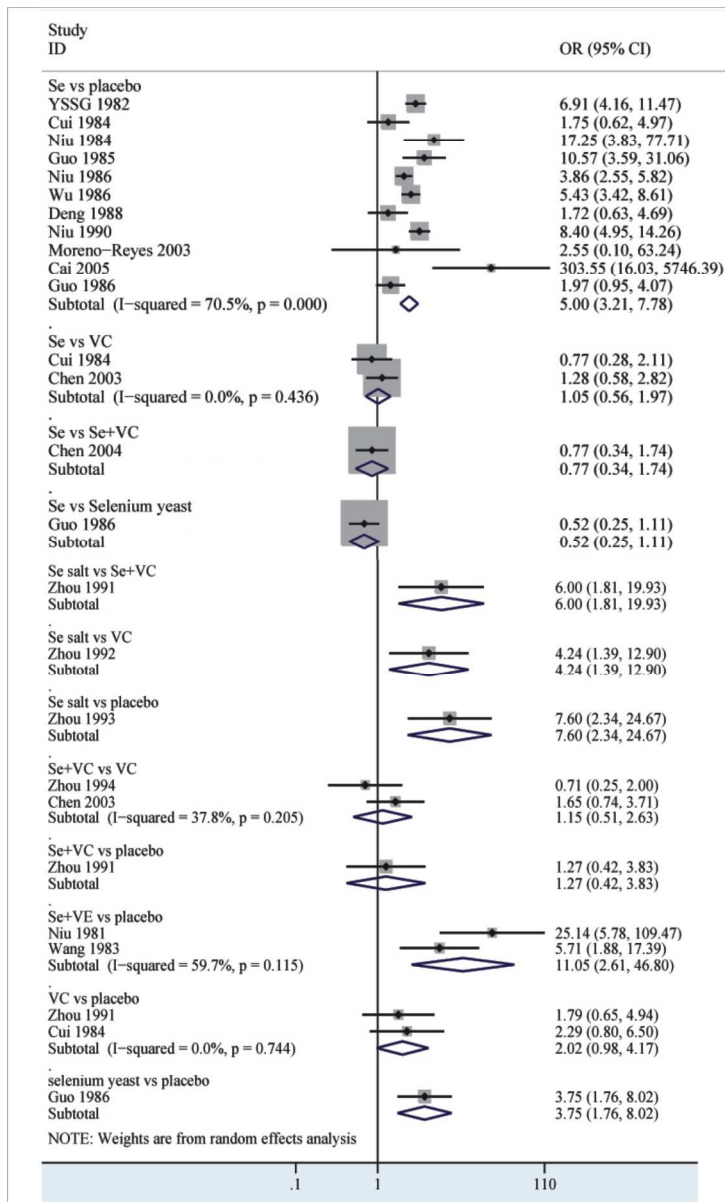

Fig 3 Forest plots of intervention-control pairwise meta-analyses of repairing rate of metaphyseal lesions on X-ray films

258x405mm (300 x 300 DPI)

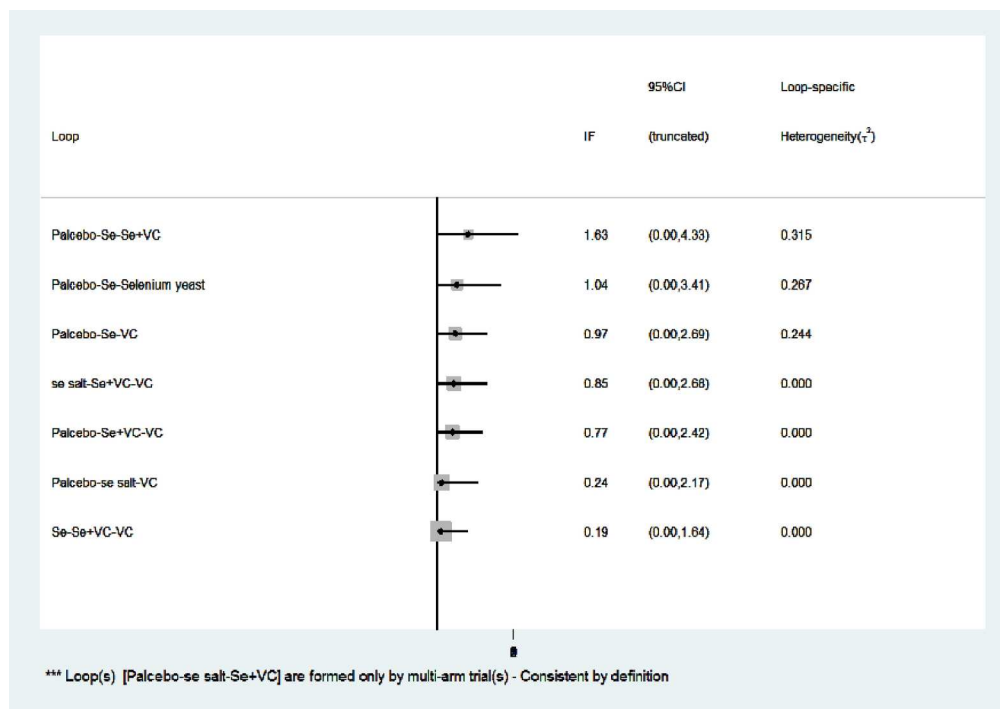

Fig 4 Consistency test in the network Meta-analysis

216x152mm (300 x 300 DPI)

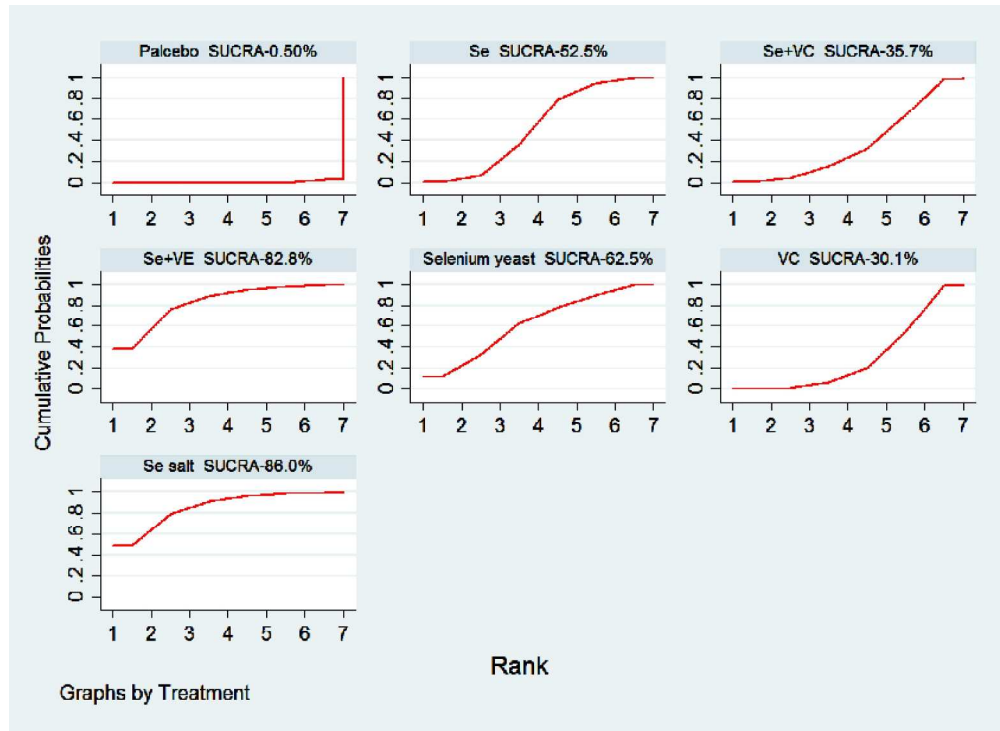

Fig 5 SUCRA for the cumulative probabilities  
SUCRA=surface under cumulative ranking

216x157mm (300 x 300 DPI)

**Appendix box 1 Ovid search strategy**

#1 exp kashin-beck disease/  
#2 kashin-beck disease.tw.  
#3 kashin-bek disease.tw.  
#4 big bone disease.tw.  
#5 endemic osteoarthritis.tw.  
#6 Urov disease.tw.  
#7 1 or 2 or 3 or 4 or 5 or 6  
#8 sodium selenite.tw.  
#9 selenium .tw.  
#10 Se salt.tw.  
#11 enriched yeast  
#12 8 or 9 or 10 or 11  
#13 7 AND 12  
#14 randomized controlled trial.pt.  
#15 controlled clinical trial.pt.  
#16 randmoized.ab.  
#17 placebo.ab.  
#18 randomly.ab.  
#19 trial.ab.  
#20 groups.ab.  
#21 14 or 15 or 16 or 17 or 18 or 19 or 20  
#22 13 and 21  
#23 limit #22 to human

Appendix table 1 Characteristics of included trials

| Study                   | Case No. |       | Age  |      | Intervention                                                                                                              | Control                                  | Follow-up<br>(months) | Outcome                                     |
|-------------------------|----------|-------|------|------|---------------------------------------------------------------------------------------------------------------------------|------------------------------------------|-----------------------|---------------------------------------------|
|                         | I        | C     | I    | C    |                                                                                                                           |                                          |                       |                                             |
| Niu 1981 <sup>18</sup>  | 27       | 29    | 6~13 | 6~13 | Se + VE: Se tablet 2mg/week +VE 15mg/day                                                                                  | Placebo/week                             | 12                    | Improvement of metaphyseal lesions on X-ray |
| YSSG 1982 <sup>19</sup> | 166      | 159   | 3~13 | 3~13 | Se tablet, 1 mg/week (3-10 yrs), 2 mg/week (11-13 yrs)                                                                    | Placebo/week                             | 12                    | Improvement of metaphyseal lesions on X-ray |
| Wang 1983 <sup>20</sup> | 47       | 42    | 5~15 | 5~15 | Se + VC: Se tablet 2mg/week +VE 15mg/day                                                                                  | No treatment                             | 11                    | Improvement of metaphyseal lesions on X-ray |
| Cui 1984 <sup>21</sup>  | 30       | 30/30 | 7~19 | 7~19 | Se tablet, 1 mg/week (7-10 yrs), 2 mg/week (11-19 yrs)                                                                    | ①VC 200 mg 3 times/day;<br>②Placebo/week | 6~12                  | Improvement of metaphyseal lesions on X-ray |
| Niu 1984 <sup>22</sup>  | 56       | 59    | 6~13 | 6~13 | Se tablet first week: 1.0 mg/day (< 10 yrs), 2.0 mg/day (> 11 yrs); after: 1.0 mg/week (< 10 yrs), 2.0 mg/week (> 11 yrs) | Placebo/week                             | 24                    | X-ray improvement                           |
| Guo 1985 <sup>23</sup>  | 50       | 50    | 5~15 | 5~15 | Se tablet, 1 mg/week (<5 yrs), 2 mg/week (>5 yrs)                                                                         | Placebo/week                             | 12                    | Improvement of metaphyseal lesions on X-ray |

| Study                   | Case No. |     | Age  |      | Intervention                                                                                                                                                               | Control       | Follow-up<br>(months) | Outcome                                     |
|-------------------------|----------|-----|------|------|----------------------------------------------------------------------------------------------------------------------------------------------------------------------------|---------------|-----------------------|---------------------------------------------|
|                         | I        | C   | I    | C    |                                                                                                                                                                            |               |                       |                                             |
| Guo 1986 <sup>24</sup>  | 60/60    | 60  | 5~14 | 5~14 | ①Se tablet, 0.5mg/week<br>(<7 yrs), 1 mg/week (>8 yrs);<br>②Se enriched yeast, 0.5mg/week<br>(<7 yrs), 1 mg/week (>8 yrs);                                                 | Placebo/week  | 13                    | Improvement of metaphyseal lesions on X-ray |
| Niu 1986 <sup>25</sup>  | 285      | 277 | 6~13 | 6~13 | Se tablet, 1 mg/week<br>(<10 yrs), 2 mg/week (>10 yrs)                                                                                                                     | Placebo/week  | 12~24                 | X-ray improvement                           |
| Wu 1986 <sup>26</sup>   | 171      | 177 | 5~16 | 5~16 | Se tablet, 1 mg/week<br>(< 10 yrs), 2 mg/week (> 10 yrs)                                                                                                                   | Placebo/week  | 12                    | Improvement of metaphyseal lesions on X-ray |
| Deng 1988 <sup>27</sup> | 43       | 46  | 2~13 | 2~13 | Se tablet, no details                                                                                                                                                      | No treatment  | 36                    | X-ray improvement                           |
| Niu 1990 <sup>28</sup>  | 210      | 228 | 6~13 | 6~13 | Se tablet, first week: 0.5 mg/day (< 5 yrs), 1.0 mg/day (6-10 yrs), 2.0 mg/day (> 11 yrs); after: 1.0 mg/month (< 5 yrs), 2.0 mg/month (6-10 yrs), 4.0 mg/month (> 11 yrs) | Placebo/month | 12                    | Improvement of metaphyseal lesions on X-ray |

| Study                           | Case No. |       | Age     |        | Intervention                                                                                             | Control                              | Follow-up<br>(months) | Outcome                                        |
|---------------------------------|----------|-------|---------|--------|----------------------------------------------------------------------------------------------------------|--------------------------------------|-----------------------|------------------------------------------------|
|                                 | I        | C     | I       | C      |                                                                                                          |                                      |                       |                                                |
| Zhou 1991 <sup>29</sup>         | 25/30    | 35/29 | 4~12    | 4~12   | ①Se + VC: Se tablet 1mg/10day+<br>VC 100mg/day;<br>②Se salt (sodium selenite: salt =<br>1:60,000) /10day | ③VC, 300mg/<br>day;<br>④No treatment | 12                    | Improvement of metaphyseal<br>lesions on X-ray |
| Chen 2003 <sup>31</sup>         | 50/50    | 50    | 6~11    | 6~11   | ①Se tablet 1mg/week;<br>② Se + VC: Se tablet 1mg/week+<br>VC 300 mg 2 times/day                          | VC 300mg bid                         | 12                    | Improvement of metaphyseal<br>lesions on X-ray |
| Moreno-Reyes 2003 <sup>30</sup> | 113      | 95    | 10±0.28 | 10±0.3 | Se tablet, 1 mg/week                                                                                     | Placebo/week                         | 12                    | X-ray improvement                              |
| Cai 2005 <sup>32</sup>          | 31       | 31    | 7~13    | 7~13   | Se tablet, 2mg/10 days (7-10 yrs), 3<br>mg/10 days (11-13 yrs)                                           | No treatment                         | 18                    | X-ray improvement                              |

I= intervention, C = control, YSSG = Yongshou scientific survey group of Kashin-Beck Disease, yrs = years, Se = Sodium selenite, Se salt = selenium salt,  
 Se + VC = the combination of selenium selenite with vitamin C ; Se + VE = the combination of selenium selenite with vitamin E

**Appendix table 2 Risk of Bias of Included Studies**

| Study                   | Balanced allocation | Allocation concealment | Blinding     | Completeness of outcome | Selective reporting | outcome | Other Bias            |
|-------------------------|---------------------|------------------------|--------------|-------------------------|---------------------|---------|-----------------------|
| Niu 1981 <sup>18</sup>  | Unclear             | Unclear                | Double-blind | Low                     | Low                 |         | Low                   |
| YSSG 1982 <sup>19</sup> | Unclear             | Unclear                | Double-blind | Low, No dropout         | Low                 |         | Low                   |
| Wang 1983 <sup>20</sup> | unclear             | unclear                | Double-blind | High, dropouts >20%     | Low                 |         | High, no ITT analysis |
| Cui 1984 <sup>21</sup>  | unclear             | unclear                | Double-blind | High, dropouts >20%     | Low                 |         | High, no ITT analysis |
| Niu 1984 <sup>22</sup>  | Unclear             | Unclear                | Double-blind | Low, No dropout         | Low                 |         | High, no ITT analysis |
| Guo 1985 <sup>23</sup>  | Unclear             | Unclear                | Not Used     | High, dropouts >20%     | Low                 |         | High, no ITT analysis |
| Guo 1986 <sup>24</sup>  | Unclear             | Unclear                | Unclear      | High, dropouts >20%     | Low                 |         | High, no ITT analysis |
| Niu 1986 <sup>25</sup>  | Unclear             | Unclear                | Double-blind | Low, No dropout         | Low                 |         | Low                   |



1  
2  
3  
4  
5  
6  
7  
8  
9  
10  
11  
12  
13  
14  
15  
16  
17  
18  
19  
20  
21  
22  
23  
24  
25  
26  
27  
28  
29  
30  
31  
32  
33  
34  
35  
36  
37  
38  
39  
40  
41  
42  
43  
44  
45  
46  
47

|                                 |         |         |              |                           |     |                       |
|---------------------------------|---------|---------|--------------|---------------------------|-----|-----------------------|
| Wu 1986 <sup>26</sup>           | Unclear | Unclear | Double-blind | Unclear, No dropout < 20% | Low | High, no ITT analysis |
| Deng 1988 <sup>27</sup>         | Unclear | Unclear | Unclear      | Low, drop out < 10%       | Low | High, no ITT analysis |
| Niu 1990 <sup>28</sup>          | Unclear | Unclear | Single-blind | Low, No dropout           | Low | Low                   |
| Zhou 1991 <sup>29</sup>         | Unclear | Unclear | Unclear      | Low, No dropout           | Low | Low                   |
| Chen 2003 <sup>31</sup>         | Unclear | Unclear | Unclear      | High, dropouts >20%       | Low | High, no ITT analysis |
| Moreno-Reyes 2003 <sup>30</sup> | Unclear | Unclear | Double-blind | Unclear, No dropout < 20% | Low | High, no ITT analysis |
| Cai 2005 <sup>32</sup>          | Unclear | Unclear | Not Used     | Low, No dropout           | Low | Low                   |

---

For peer review only

PROSPERO International prospective register of systematic reviews

Review title and timescale

- 1 Review title  
Give the working title of the review. This must be in English. Ideally it should state succinctly the interventions or exposures being reviewed and the associated health or social problem being addressed in the review.  
**Effects of five types of selenium supplementation for treatment of Kashin-Beck disease in children: a systematic review and network meta-analysis**
- 2 Original language title  
For reviews in languages other than English, this field should be used to enter the title in the language of the review. This will be displayed together with the English language title.
- 3 Anticipated or actual start date  
Give the date when the systematic review commenced, or is expected to commence.  
**07/03/2016**
- 4 Anticipated completion date  
Give the date by which the review is expected to be completed.  
**31/12/2016**
- 5 Stage of review at time of this submission  
Indicate the stage of progress of the review by ticking the relevant boxes. Reviews that have progressed beyond the point of completing data extraction at the time of initial registration are not eligible for inclusion in PROSPERO. This field should be updated when any amendments are made to a published record.

The review has not yet started **x**

| Review stage                                                    | Started | Completed |
|-----------------------------------------------------------------|---------|-----------|
| Preliminary searches                                            | Yes     | Yes       |
| Piloting of the study selection process                         | Yes     | Yes       |
| Formal screening of search results against eligibility criteria | Yes     | Yes       |
| Data extraction                                                 | Yes     | No        |
| Risk of bias (quality) assessment                               | Yes     | No        |
| Data analysis                                                   | Yes     | No        |

Provide any other relevant information about the stage of the review here.

Review team details

- 6 Named contact  
The named contact acts as the guarantor for the accuracy of the information presented in the register record.  
**Yulin Liao**
- 7 Named contact email  
Enter the electronic mail address of the named contact.  
**yulinliao\_2015@163.com**
- 8 Named contact address  
Enter the full postal address for the named contact.  
**West China Hospital, Sichuan University, Chengdu , China**
- 9 Named contact phone number  
Enter the telephone number for the named contact, including international dialing code.  
**15198147968**
- 10 Organisational affiliation of the review  
Full title of the organisational affiliations for this review, and website address if available. This field may be completed as 'None' if the review is not affiliated to any organisation.

None.

Website address:

11 Review team members and their organisational affiliations

Give the title, first name and last name of all members of the team working directly on the review. Give the organisational affiliations of each member of the review team.

| Title     | First name | Last name | Affiliation                                                                                           |
|-----------|------------|-----------|-------------------------------------------------------------------------------------------------------|
| Miss      | Yulin      | Liao      | West China Hospital, Sichuan University, Chengdu , China                                              |
| Mrs       | Dongmei    | Xie       | West China Hospital, Sichuan University, Chengdu , China                                              |
| Professor | Jirong     | Yue       | West China Hospital, Sichuan University, Chengdu , China                                              |
| Professor | Chao       | Zhang     | Center for Evidence-Based Medicine and Clinical Research, Taihe Hospital Hubei University of Medicine |
| Mrs       | Yanyan     | Wang      | West China Hospital, Sichuan University, Chengdu , China                                              |
| Miss      | Chuanyao   | Deng      | West China Hospital, Sichuan University, Chengdu , China                                              |
| Miss      | Ling       | Chen      | West China Hospital, Sichuan University, Chengdu , China                                              |

12 Funding sources/sponsors

Give details of the individuals, organizations, groups or other legal entities who take responsibility for initiating, managing, sponsoring and/or financing the review. Any unique identification numbers assigned to the review by the individuals or bodies listed should be included.

None

13 Conflicts of interest

List any conditions that could lead to actual or perceived undue influence on judgements concerning the main topic investigated in the review.

Are there any actual or potential conflicts of interest?

None known

14 Collaborators

Give the name, affiliation and role of any individuals or organisations who are working on the review but who are not listed as review team members.

| Title | First name | Last name | Organisation details |
|-------|------------|-----------|----------------------|
|-------|------------|-----------|----------------------|

## Review methods

15 Review question(s)

State the question(s) to be addressed / review objectives. Please complete a separate box for each question.

Comparing the effectiveness of five kinds of selenium supplementation for the treatment of patients with Kashin-Beck disease (KBD), and ranking these selenium supplementation based on their performance.

16 Searches

Give details of the sources to be searched, and any restrictions (e.g. language or publication period). The full search strategy is not required, but may be supplied as a link or attachment.

We will search, without language restrictions, for all publications between January 1966 and 31 Oct 2016 using electronic databases, which included MEDLINE, EMBASE, The Cochrane Central Register of Controlled Trials (CENTRAL), The Cochrane Database of Systematic Reviews, The Chinese Biomedical Database, Chinese National Knowledge Infrastructure, Chinese Science and Technique Journals Database, and Wan Fang database.

17 URL to search strategy

If you have one, give the link to your search strategy here. Alternatively you can e-mail this to PROSPERO and we will store and link to it.

I give permission for this file to be made publicly available

Yes

18 Condition or domain being studied

Give a short description of the disease, condition or healthcare domain being studied. This could include health and wellbeing outcomes.

Kashin-Beck disease.

19 Participants/population

Give summary criteria for the participants or populations being studied by the review. The preferred format includes details of both inclusion and exclusion criteria.

Children.

20 Intervention(s), exposure(s)

Give full and clear descriptions of the nature of the interventions or the exposures to be reviewed

Selenium tablet and other types of selenium supplements including Selenium salt, selenium enriched yeast, Selenium+ VE, or Selenium + VC .

21 Comparator(s)/control

Where relevant, give details of the alternatives against which the main subject/topic of the review will be compared (e.g. another intervention or a non-exposed control group).

Placebo or no treatment or other other types of selenium supplements.

22 Types of study to be included

Give details of the study designs to be included in the review. If there are no restrictions on the types of study design eligible for inclusion, this should be stated.

Randomized, controlled trials (RCTs).

23 Context

Give summary details of the setting and other relevant characteristics which help define the inclusion or exclusion criteria.

24 Primary outcome(s)

Give the most important outcomes.

The repairing rate of metaphyseal lesions on X-ray film.

Give information on timing and effect measures, as appropriate.

25 Secondary outcomes

List any additional outcomes that will be addressed. If there are no secondary outcomes enter None.

None.

Give information on timing and effect measures, as appropriate.

26 Data extraction (selection and coding)

Give the procedure for selecting studies for the review and extracting data, including the number of researchers involved and how discrepancies will be resolved. List the data to be extracted.

27 Risk of bias (quality) assessment

State whether and how risk of bias will be assessed, how the quality of individual studies will be assessed, and whether and how this will influence the planned synthesis.

Two reviewers will independently evaluate the methodological quality of individual study according the Cochrane risk-of-bias tool. Any disagreements will be resolved by consulting a third author.

28 Strategy for data synthesis

Give the planned general approach to be used, for example whether the data to be used will be aggregate or at the level of individual participants, and whether a quantitative or narrative (descriptive) synthesis is planned. Where

appropriate a brief outline of analytic approach should be given.

Initially, we will perform standard pairwise meta-analyses for all available direct comparisons in STATA. Statistical heterogeneity of treatment effects across studies will be assessed by the Cochrane Q test, and the extent of between-study heterogeneity will be quantified by I-squared. Then we will conduct network meta-analysis in STATA to determine comparative effectiveness of each therapy. We will present estimates of treatment effects as odds ratios and 95% central credible intervals (CrI).

#### 29 Analysis of subgroups or subsets

Give any planned exploration of subgroups or subsets within the review. 'None planned' is a valid response if no subgroup analyses are planned.

'None planned.'

### Review general information

#### 30 Type and method of review

Select the type of review and the review method from the drop down list.

Systematic review

#### 31 Language

Select the language(s) in which the review is being written and will be made available, from the drop down list. Use the control key to select more than one language.

English

Will a summary/abstract be made available in English?

Yes

#### 32 Country

Select the country in which the review is being carried out from the drop down list. For multi-national collaborations select all the countries involved. Use the control key to select more than one country.

China

#### 33 Other registration details

Give the name of any organisation where the systematic review title or protocol is registered together with any unique identification number assigned. If extracted data will be stored and made available through a repository such as the Systematic Review Data Repository (SRDR), details and a link should be included here.

#### 34 Reference and/or URL for published protocol

Give the citation for the published protocol, if there is one.

Give the link to the published protocol, if there is one. This may be to an external site or to a protocol deposited with CRD in pdf format.

I give permission for this file to be made publicly available

Yes

#### 35 Dissemination plans

Give brief details of plans for communicating essential messages from the review to the appropriate audiences.

Do you intend to publish the review on completion?

Yes

#### 36 Keywords

Give words or phrases that best describe the review. (One word per box, create a new box for each term)

#### 37 Details of any existing review of the same topic by the same authors

Give details of earlier versions of the systematic review if an update of an existing review is being registered, including full bibliographic reference if possible.

#### 38 Current review status

Review status should be updated when the review is completed and when it is published.

Ongoing

- 1  
2  
3  
4  
5 39 Any additional information  
6 Provide any further information the review team consider relevant to the registration of the review.  
7  
8 40 Details of final report/publication(s)  
9 This field should be left empty until details of the completed review are available.  
10 Give the full citation for the final report or publication of the systematic review.  
11 Give the URL where available.  
12  
13  
14  
15  
16  
17  
18  
19  
20  
21  
22  
23  
24  
25  
26  
27  
28  
29  
30  
31  
32  
33  
34  
35  
36  
37  
38  
39  
40  
41  
42  
43  
44  
45  
46  
47  
48  
49  
50  
51  
52  
53  
54  
55  
56  
57  
58  
59  
60

For peer review only

PRISMA NMA Checklist of Items to Include When Reporting A Systematic Review  
Involving a Network Meta-analysis

| Section/Topic             | Item # | Checklist Item                                                                                                                                                                                                                                                                                                                                                                                                                                                                                                                                                                                                                                                                                                                                                                          | Reported on Page #                               |
|---------------------------|--------|-----------------------------------------------------------------------------------------------------------------------------------------------------------------------------------------------------------------------------------------------------------------------------------------------------------------------------------------------------------------------------------------------------------------------------------------------------------------------------------------------------------------------------------------------------------------------------------------------------------------------------------------------------------------------------------------------------------------------------------------------------------------------------------------|--------------------------------------------------|
| <b>TITLE</b>              |        |                                                                                                                                                                                                                                                                                                                                                                                                                                                                                                                                                                                                                                                                                                                                                                                         |                                                  |
| Title                     | 1      | Identify the report as a systematic review <i>incorporating a network meta-analysis (or related form of meta-analysis)</i> .                                                                                                                                                                                                                                                                                                                                                                                                                                                                                                                                                                                                                                                            | Page 1                                           |
| <b>ABSTRACT</b>           |        |                                                                                                                                                                                                                                                                                                                                                                                                                                                                                                                                                                                                                                                                                                                                                                                         |                                                  |
| Structured summary        | 2      | Provide a structured summary including, as applicable:<br><b>Background:</b> main objectives<br><b>Methods:</b> data sources; study eligibility criteria, participants, and interventions; study appraisal; and <i>synthesis methods, such as network meta-analysis</i> .<br><b>Results:</b> number of studies and participants identified; summary estimates with corresponding confidence/credible intervals; <i>treatment rankings may also be discussed. Authors may choose to summarize pairwise comparisons against a chosen treatment included in their analyses for brevity.</i><br><b>Discussion/Conclusions:</b> limitations; conclusions and implications of findings.<br><b>Other:</b> primary source of funding; systematic review registration number with registry name. | Page 3                                           |
| <b>INTRODUCTION</b>       |        |                                                                                                                                                                                                                                                                                                                                                                                                                                                                                                                                                                                                                                                                                                                                                                                         |                                                  |
| Rationale                 | 3      | Describe the rationale for the review in the context of what is already known, <i>including mention of why a network meta-analysis has been conducted</i> .                                                                                                                                                                                                                                                                                                                                                                                                                                                                                                                                                                                                                             | Page 4                                           |
| Objectives                | 4      | Provide an explicit statement of questions being addressed, with reference to participants, interventions, comparisons, outcomes, and study design (PICOS).                                                                                                                                                                                                                                                                                                                                                                                                                                                                                                                                                                                                                             | Page 4                                           |
| <b>METHODS</b>            |        |                                                                                                                                                                                                                                                                                                                                                                                                                                                                                                                                                                                                                                                                                                                                                                                         |                                                  |
| Protocol and registration | 5      | Indicate whether a review protocol exists and if and where it can be accessed (e.g., Web address); and, if available, provide registration information, including registration number.                                                                                                                                                                                                                                                                                                                                                                                                                                                                                                                                                                                                  | Page 5<br>Registration number:<br>CRD42016051874 |
| Eligibility criteria      | 6      | Specify study characteristics (e.g., PICOS, length of follow-up) and report characteristics (e.g., years considered, language, publication status) used as criteria for eligibility, giving rationale. <i>Clearly describe eligible treatments included in the treatment network, and note whether any have been clustered or merged into the same node (with justification)</i> .                                                                                                                                                                                                                                                                                                                                                                                                      | Page 6                                           |
| Information sources       | 7      | Describe all information sources (e.g., databases with dates of coverage, contact with study authors to identify additional studies) in the search and date last searched.                                                                                                                                                                                                                                                                                                                                                                                                                                                                                                                                                                                                              | Page 5                                           |

|    |                                        |    |                                                                                                                                                                                                                                                                                                                                                                                                                                                   |                  |
|----|----------------------------------------|----|---------------------------------------------------------------------------------------------------------------------------------------------------------------------------------------------------------------------------------------------------------------------------------------------------------------------------------------------------------------------------------------------------------------------------------------------------|------------------|
| 1  | Search                                 | 8  | Present full electronic search strategy for at least one database, including any limits used, such that it could be repeated.                                                                                                                                                                                                                                                                                                                     | Page 5           |
| 2  |                                        |    |                                                                                                                                                                                                                                                                                                                                                                                                                                                   |                  |
| 3  |                                        |    |                                                                                                                                                                                                                                                                                                                                                                                                                                                   |                  |
| 4  | Study selection                        | 9  | State the process for selecting studies (i.e., screening, eligibility, included in systematic review, and, if applicable, included in the meta-analysis).                                                                                                                                                                                                                                                                                         | Page 6           |
| 5  |                                        |    |                                                                                                                                                                                                                                                                                                                                                                                                                                                   |                  |
| 6  |                                        |    |                                                                                                                                                                                                                                                                                                                                                                                                                                                   |                  |
| 7  | Data collection process                | 10 | Describe method of data extraction from reports (e.g., piloted forms, independently, in duplicate) and any processes for obtaining and confirming data from investigators.                                                                                                                                                                                                                                                                        | Page 6           |
| 8  |                                        |    |                                                                                                                                                                                                                                                                                                                                                                                                                                                   |                  |
| 9  |                                        |    |                                                                                                                                                                                                                                                                                                                                                                                                                                                   |                  |
| 10 |                                        |    |                                                                                                                                                                                                                                                                                                                                                                                                                                                   |                  |
| 11 | Data items                             | 11 | List and define all variables for which data were sought (e.g., PICOS, funding sources) and any assumptions and simplifications made.                                                                                                                                                                                                                                                                                                             | Page 5-6         |
| 12 |                                        |    |                                                                                                                                                                                                                                                                                                                                                                                                                                                   |                  |
| 13 |                                        |    |                                                                                                                                                                                                                                                                                                                                                                                                                                                   |                  |
| 14 | <b>Geometry of the network</b>         | S1 | Describe methods used to explore the geometry of the treatment network under study and potential biases related to it. This should include how the evidence base has been graphically summarized for presentation, and what characteristics were compiled and used to describe the evidence base to readers.                                                                                                                                      | Page 6-7 & Fig 2 |
| 15 |                                        |    |                                                                                                                                                                                                                                                                                                                                                                                                                                                   |                  |
| 16 |                                        |    |                                                                                                                                                                                                                                                                                                                                                                                                                                                   |                  |
| 17 |                                        |    |                                                                                                                                                                                                                                                                                                                                                                                                                                                   |                  |
| 18 |                                        |    |                                                                                                                                                                                                                                                                                                                                                                                                                                                   |                  |
| 19 |                                        |    |                                                                                                                                                                                                                                                                                                                                                                                                                                                   |                  |
| 20 |                                        |    |                                                                                                                                                                                                                                                                                                                                                                                                                                                   |                  |
| 21 | Risk of bias within individual studies | 12 | Describe methods used for assessing risk of bias of individual studies (including specification of whether this was done at the study or outcome level), and how this information is to be used in any data synthesis.                                                                                                                                                                                                                            | Page 6           |
| 22 |                                        |    |                                                                                                                                                                                                                                                                                                                                                                                                                                                   |                  |
| 23 |                                        |    |                                                                                                                                                                                                                                                                                                                                                                                                                                                   |                  |
| 24 |                                        |    |                                                                                                                                                                                                                                                                                                                                                                                                                                                   |                  |
| 25 | Summary measures                       | 13 | State the principal summary measures (e.g., risk ratio, difference in means). <i>Also describe the use of additional summary measures assessed, such as treatment rankings and surface under the cumulative ranking curve (SUCRA) values, as well as modified approaches used to present summary findings from meta-analyses.</i>                                                                                                                 | Page 6-7         |
| 26 |                                        |    |                                                                                                                                                                                                                                                                                                                                                                                                                                                   |                  |
| 27 |                                        |    |                                                                                                                                                                                                                                                                                                                                                                                                                                                   |                  |
| 28 |                                        |    |                                                                                                                                                                                                                                                                                                                                                                                                                                                   |                  |
| 29 |                                        |    |                                                                                                                                                                                                                                                                                                                                                                                                                                                   |                  |
| 30 |                                        |    |                                                                                                                                                                                                                                                                                                                                                                                                                                                   |                  |
| 31 | Planned methods of analysis            | 14 | Describe the methods of handling data and combining results of studies for each network meta-analysis. This should include, but not be limited to: <ul style="list-style-type: none"> <li>• <i>Handling of multi-arm trials;</i></li> <li>• <i>Selection of variance structure;</i></li> <li>• <i>Selection of prior distributions in Bayesian analyses; and</i></li> <li>• <i>Assessment of model fit.</i></li> </ul>                            | Page 6-7         |
| 32 |                                        |    |                                                                                                                                                                                                                                                                                                                                                                                                                                                   |                  |
| 33 |                                        |    |                                                                                                                                                                                                                                                                                                                                                                                                                                                   |                  |
| 34 |                                        |    |                                                                                                                                                                                                                                                                                                                                                                                                                                                   |                  |
| 35 |                                        |    |                                                                                                                                                                                                                                                                                                                                                                                                                                                   |                  |
| 36 |                                        |    |                                                                                                                                                                                                                                                                                                                                                                                                                                                   |                  |
| 37 |                                        |    |                                                                                                                                                                                                                                                                                                                                                                                                                                                   |                  |
| 38 |                                        |    |                                                                                                                                                                                                                                                                                                                                                                                                                                                   |                  |
| 39 |                                        |    |                                                                                                                                                                                                                                                                                                                                                                                                                                                   |                  |
| 40 | <b>Assessment of Inconsistency</b>     | S2 | Describe the statistical methods used to evaluate the agreement of direct and indirect evidence in the treatment network(s) studied. Describe efforts taken to address its presence when found.                                                                                                                                                                                                                                                   | Page 7           |
| 41 |                                        |    |                                                                                                                                                                                                                                                                                                                                                                                                                                                   |                  |
| 42 |                                        |    |                                                                                                                                                                                                                                                                                                                                                                                                                                                   |                  |
| 43 |                                        |    |                                                                                                                                                                                                                                                                                                                                                                                                                                                   |                  |
| 44 | Risk of bias across studies            | 15 | Specify any assessment of risk of bias that may affect the cumulative evidence (e.g., publication bias, selective reporting within studies).                                                                                                                                                                                                                                                                                                      | Page 6           |
| 45 |                                        |    |                                                                                                                                                                                                                                                                                                                                                                                                                                                   |                  |
| 46 |                                        |    |                                                                                                                                                                                                                                                                                                                                                                                                                                                   |                  |
| 47 | Additional analyses                    | 16 | Describe methods of additional analyses if done, indicating which were pre-specified. This may include, but not be limited to, the following: <ul style="list-style-type: none"> <li>• Sensitivity or subgroup analyses;</li> <li>• Meta-regression analyses;</li> <li>• <i>Alternative formulations of the treatment network; and</i></li> <li>• <i>Use of alternative prior distributions for Bayesian analyses (if applicable).</i></li> </ul> | Page 7           |
| 48 |                                        |    |                                                                                                                                                                                                                                                                                                                                                                                                                                                   |                  |
| 49 |                                        |    |                                                                                                                                                                                                                                                                                                                                                                                                                                                   |                  |
| 50 |                                        |    |                                                                                                                                                                                                                                                                                                                                                                                                                                                   |                  |
| 51 |                                        |    |                                                                                                                                                                                                                                                                                                                                                                                                                                                   |                  |
| 52 |                                        |    |                                                                                                                                                                                                                                                                                                                                                                                                                                                   |                  |
| 53 |                                        |    |                                                                                                                                                                                                                                                                                                                                                                                                                                                   |                  |
| 54 |                                        |    |                                                                                                                                                                                                                                                                                                                                                                                                                                                   |                  |
| 55 |                                        |    |                                                                                                                                                                                                                                                                                                                                                                                                                                                   |                  |
| 56 |                                        |    |                                                                                                                                                                                                                                                                                                                                                                                                                                                   |                  |
| 57 |                                        |    |                                                                                                                                                                                                                                                                                                                                                                                                                                                   |                  |
| 58 |                                        |    |                                                                                                                                                                                                                                                                                                                                                                                                                                                   |                  |
| 59 |                                        |    |                                                                                                                                                                                                                                                                                                                                                                                                                                                   |                  |
| 60 |                                        |    |                                                                                                                                                                                                                                                                                                                                                                                                                                                   |                  |



**RESULTS†**

|                                          |           |                                                                                                                                                                                                                                                                                                                                                                                                                                                              |                            |
|------------------------------------------|-----------|--------------------------------------------------------------------------------------------------------------------------------------------------------------------------------------------------------------------------------------------------------------------------------------------------------------------------------------------------------------------------------------------------------------------------------------------------------------|----------------------------|
| Study selection                          | 17        | Give numbers of studies screened, assessed for eligibility, and included in the review, with reasons for exclusions at each stage, ideally with a flow diagram.                                                                                                                                                                                                                                                                                              | Page 7 & Fig 1             |
| <b>Presentation of network structure</b> | <b>S3</b> | Provide a network graph of the included studies to enable visualization of the geometry of the treatment network.                                                                                                                                                                                                                                                                                                                                            | Fig 2                      |
| <b>Summary of network geometry</b>       | <b>S4</b> | Provide a brief overview of characteristics of the treatment network. This may include commentary on the abundance of trials and randomized patients for the different interventions and pairwise comparisons in the network, gaps of evidence in the treatment network, and potential biases reflected by the network structure.                                                                                                                            | Page 8                     |
| Study characteristics                    | 18        | For each study, present characteristics for which data were extracted (e.g., study size, PICOS, follow-up period) and provide the citations.                                                                                                                                                                                                                                                                                                                 | Page 8 & Appendix table 1  |
| Risk of bias within studies              | 19        | Present data on risk of bias of each study and, if available, any outcome level assessment.                                                                                                                                                                                                                                                                                                                                                                  | Page 8 & Appendix table 1  |
| Results of individual studies            | 20        | For all outcomes considered (benefits or harms), present, for each study: 1) simple summary data for each intervention group, and 2) effect estimates and confidence intervals. <i>Modified approaches may be needed to deal with information from larger networks.</i>                                                                                                                                                                                      | Page 8-9 & Fig 3           |
| Synthesis of results                     | 21        | Present results of each meta-analysis done, including confidence/credible intervals. <i>In larger networks, authors may focus on comparisons versus a particular comparator (e.g. placebo or standard care), with full findings presented in an appendix. League tables and forest plots may be considered to summarize pairwise comparisons.</i> If additional summary measures were explored (such as treatment rankings), these should also be presented. | Page 8-9 & Table 1         |
| <b>Exploration for inconsistency</b>     | <b>S5</b> | Describe results from investigations of inconsistency. This may include such information as measures of model fit to compare consistency and inconsistency models, <i>P</i> values from statistical tests, or summary of inconsistency estimates from different parts of the treatment network.                                                                                                                                                              | Page 9 & Fig 4             |
| Risk of bias across studies              | 22        | Present results of any assessment of risk of bias across studies for the evidence base being studied.                                                                                                                                                                                                                                                                                                                                                        | Page 9 & Fig 4             |
| Results of additional analyses           | 23        | Give results of additional analyses, if done (e.g., sensitivity or subgroup analyses, meta-regression analyses, <i>alternative network geometries studied, alternative choice of prior distributions for Bayesian analyses, and so forth</i> ).                                                                                                                                                                                                              | Page 9<br>Table 2<br>Fig 5 |

**DISCUSSION**

|    |                     |    |                                                                                                                                                                                                                                                                                                                                                                                                                                |
|----|---------------------|----|--------------------------------------------------------------------------------------------------------------------------------------------------------------------------------------------------------------------------------------------------------------------------------------------------------------------------------------------------------------------------------------------------------------------------------|
| 1  |                     |    |                                                                                                                                                                                                                                                                                                                                                                                                                                |
| 2  | Summary of evidence | 24 | Summarize the main findings, including the strength of evidence for each main outcome; consider their relevance to key groups (e.g., healthcare providers, users, and policy-makers).                                                                                                                                                                                                                                          |
| 3  |                     |    |                                                                                                                                                                                                                                                                                                                                                                                                                                |
| 4  |                     |    |                                                                                                                                                                                                                                                                                                                                                                                                                                |
| 5  |                     |    |                                                                                                                                                                                                                                                                                                                                                                                                                                |
| 6  | Limitations         | 25 | Discuss limitations at study and outcome level (e.g., risk of bias), and at review level (e.g., incomplete retrieval of identified research, reporting bias). <i>Comment on the validity of the assumptions, such as transitivity and consistency. Comment on any concerns regarding network geometry (e.g., avoidance of certain comparisons).</i>                                                                            |
| 7  |                     |    |                                                                                                                                                                                                                                                                                                                                                                                                                                |
| 8  |                     |    |                                                                                                                                                                                                                                                                                                                                                                                                                                |
| 9  |                     |    |                                                                                                                                                                                                                                                                                                                                                                                                                                |
| 10 |                     |    |                                                                                                                                                                                                                                                                                                                                                                                                                                |
| 11 |                     |    |                                                                                                                                                                                                                                                                                                                                                                                                                                |
| 12 |                     |    |                                                                                                                                                                                                                                                                                                                                                                                                                                |
| 13 | Conclusions         | 26 | Provide a general interpretation of the results in the context of other evidence, and implications for future research.                                                                                                                                                                                                                                                                                                        |
| 14 |                     |    |                                                                                                                                                                                                                                                                                                                                                                                                                                |
| 15 |                     |    |                                                                                                                                                                                                                                                                                                                                                                                                                                |
| 16 |                     |    |                                                                                                                                                                                                                                                                                                                                                                                                                                |
| 17 |                     |    |                                                                                                                                                                                                                                                                                                                                                                                                                                |
| 18 | <b>FUNDING</b>      |    |                                                                                                                                                                                                                                                                                                                                                                                                                                |
| 19 | Funding             | 27 | Describe sources of funding for the systematic review and other support (e.g., supply of data); role of funders for the systematic review. This should also include information regarding whether funding has been received from manufacturers of treatments in the network and/or whether some of the authors are content experts with professional conflicts of interest that could affect use of treatments in the network. |
| 20 |                     |    |                                                                                                                                                                                                                                                                                                                                                                                                                                |
| 21 |                     |    |                                                                                                                                                                                                                                                                                                                                                                                                                                |
| 22 |                     |    |                                                                                                                                                                                                                                                                                                                                                                                                                                |
| 23 |                     |    |                                                                                                                                                                                                                                                                                                                                                                                                                                |
| 24 |                     |    |                                                                                                                                                                                                                                                                                                                                                                                                                                |
| 25 |                     |    |                                                                                                                                                                                                                                                                                                                                                                                                                                |
| 26 |                     |    |                                                                                                                                                                                                                                                                                                                                                                                                                                |
| 27 |                     |    |                                                                                                                                                                                                                                                                                                                                                                                                                                |

PICOS = population, intervention, comparators, outcomes, study design.

\* Text in italics indicates wording specific to reporting of network meta-analyses that has been added to guidance from the PRISMA statement.

† Authors may wish to plan for use of appendices to present all relevant information in full detail for items in this section.

# BMJ Open

## Effects of Five Types of Selenium Supplementation for Treatment of Kashin-Beck disease in children: A Systematic Review and Network Meta-analysis

|                                 |                                                                                                                                                                                                                                                                                                                                                                                                                                                                                                                                                                                                                                     |
|---------------------------------|-------------------------------------------------------------------------------------------------------------------------------------------------------------------------------------------------------------------------------------------------------------------------------------------------------------------------------------------------------------------------------------------------------------------------------------------------------------------------------------------------------------------------------------------------------------------------------------------------------------------------------------|
| Journal:                        | <i>BMJ Open</i>                                                                                                                                                                                                                                                                                                                                                                                                                                                                                                                                                                                                                     |
| Manuscript ID                   | bmjopen-2017-017883.R1                                                                                                                                                                                                                                                                                                                                                                                                                                                                                                                                                                                                              |
| Article Type:                   | Research                                                                                                                                                                                                                                                                                                                                                                                                                                                                                                                                                                                                                            |
| Date Submitted by the Author:   | 13-Oct-2017                                                                                                                                                                                                                                                                                                                                                                                                                                                                                                                                                                                                                         |
| Complete List of Authors:       | Xie, Dongmei; West China Hospital, Sichuan University, Department of Geriatrics<br>Liao, Yulin; West China Hospital, Sichuan University, Department of Geriatrics<br>Yue, Jirong; West China Hospital, Sichuan University, Department of Geriatrics<br>Zhang, Chao; Taihe Hospital, Hubei University of Medicine, Center for Evidence-based Medicine and Clinical Research<br>Wang, Yanyan; West China Hospital, Sichuan University, Department of Geriatrics<br>Deng, Chuanyao; West China Hospital, Sichuan University, Department of Geriatrics<br>Chen, Ling; West China Hospital, Sichuan University, Department of Geriatrics |
| <b>Primary Subject Heading</b>: | Evidence based practice                                                                                                                                                                                                                                                                                                                                                                                                                                                                                                                                                                                                             |
| Secondary Subject Heading:      | Complementary medicine, Evidence based practice, Medical management, Nutrition and metabolism                                                                                                                                                                                                                                                                                                                                                                                                                                                                                                                                       |
| Keywords:                       | Kashin-Beck disease, Selenium supplementation, Network meta-analysis, Randomized controlled trial                                                                                                                                                                                                                                                                                                                                                                                                                                                                                                                                   |
|                                 |                                                                                                                                                                                                                                                                                                                                                                                                                                                                                                                                                                                                                                     |

SCHOLARONE™  
Manuscripts

1  
2  
3  
4 **Effects of Five Types of Selenium Supplementation for Treatment**  
5 **of Kashin-Beck disease in children: A Systematic Review and**  
6 **Network Meta-analysis**  
7  
8  
9

10 **Running title: Selenium Supplementation for Treatment of KBD**

11 Dongmei Xie, Yulin Liao, Jirong Yue, Chao Zhang, Yanyan Wang, Chuanyao Deng, Ling  
12 Chen  
13  
14  
15

16  
17 **Dongmei Xie BS<sup>a</sup>**

18 Department of Geriatrics, West China Hospital, Sichuan University  
19 No. 37, Guo Xue Xiang, Chengdu, Sichuan, CHINA  
20  
21  
22

23  
24 **Yulin Liao MD<sup>a</sup>**

25 Department of Geriatrics, West China Hospital, Sichuan University  
26 No. 37, Guo Xue Xiang, Chengdu, Sichuan, CHINA  
27  
28  
29

30 **Jirong Yue, MD (corresponding author)<sup>b</sup>**

31 Department of Geriatrics, West China Hospital, Sichuan University  
32 No. 37, Guo Xue Xiang, Chengdu, Sichuan, CHINA  
33  
34  
35

36 Email: [yuejirong11@hotmail.com](mailto:yuejirong11@hotmail.com)  
37  
38  
39

40 **Chao Zhang, MD (corresponding author)<sup>b</sup>**

41 Center for Evidence-Based Medicine and Clinical Research, Taihe Hospital  
42 Hubei University of Medicine, Shiyan 442000, Hubei Province, China  
43  
44  
45  
46  
47  
48  
49  
50  
51  
52  
53  
54  
55  
56  
57  
58  
59  
60

51 **Yanyan Wang PHD**

52 Department of Geriatrics, West China Hospital, Sichuan University  
53 No. 37, Guo Xue Xiang, Chengdu, Sichuan, CHINA  
54  
55  
56  
57  
58  
59  
60

1  
2  
3  
4  
5  
6 **Chuanyao Deng BS**

7 Department of Geriatrics, West China Hospital, Sichuan University

8 No. 37, Guo Xue Xiang, Chengdu, Sichuan, CHINA  
9  
10  
11

12  
13 **Ling Chen BS**

14 Department of Geriatrics, West China Hospital, Sichuan University

15 No. 37, Guo Xue Xiang, Chengdu, Sichuan, CHINA  
16  
17  
18

19 <sup>a</sup> Dongmei Xie and Yulin Liao contributed equally to this article as co-first authors.

20  
21 <sup>b</sup> Jirong Yue and Chao Zhang contributed equally to this article as co-corresponding authors.  
22  
23  
24  
25  
26  
27  
28  
29  
30  
31  
32  
33  
34  
35  
36  
37  
38  
39  
40  
41  
42  
43  
44  
45  
46  
47  
48  
49  
50  
51  
52  
53  
54  
55  
56  
57  
58  
59  
60

## Abstract

**Objective:** To compare the effectiveness of five kinds of selenium supplementation for the treatment of patients with Kashin-Beck disease (KBD), and rank these selenium supplementation based on their performance.

**Design:** We searched for all publications between January 1, 1966 and March 31, 2017 using seven electronic databases. GRADE system to NMAs was applied to rate the quality of the evidence. We conducted a random effects model network meta-analysis in STATA to determine comparative effectiveness of each intervention. Rankings were obtained by using the surface under the cumulative ranking curve (SUCRA) values and mean ranks.

**Results:** A total of 15 randomized controlled trials involving 2931 patients were included. After assessment of the overall quality of the evidence, we downgraded our primary outcomes from high to low or very low quality. Network meta-analyses showed that all five kinds of selenium supplementation had higher metaphysis X-ray improvement which were superior to placebo. Ranking on efficacy indicated that selenium salt was ranked the most effective, followed by sodium selenite + vitamin E, selenium enriched yeast, sodium selenite and then sodium selenite + vitamin C.

**Conclusions:** Based on the results of network meta-analysis, all five types of selenium supplements are more effective than placebo in promoting the repair of metaphysis impairment. The effect of selenium salt ranked most effective. Since the overall quality of the evidence was low or very low, the SUCRA values may be misleading and should be considered jointly with the GRADE confidence in the estimates for each comparison. Se salt can be an economical and convenient strategy for controlling KBD in endemic areas. However, suitable dosages should be strictly controlled and the content of selenium should be closely monitored.

**Trial registration number:** CRD42016051874

**Keywords:** Kashin-Beck disease; Selenium supplementation; Network meta-analysis; Randomized controlled trial

**Strengths of this study:**

- The present NMA integrated evidence from direct and indirect comparisons.
- We comprehensively summarized all RCTs of selenium supplements for KBD.
- We applied GRADE system to NMAs based GRADE working group to rate the quality of the evidence.

**Potential limitations:**

- Despite our exhaustive search, only 15 RCTs conducted in China were included in this review. Some trials may have been published in local journals that were missed in our search.
- The overall quality of the evidence was low or very low.
- The SUCRA values may be misleading and should be considered jointly with the GRADE confidence in the estimates for each comparison.

## Introduction

Kashin-Beck disease (KBD) is a chronic, disabling degenerative disease of the peripheral joints and spine<sup>1,2</sup>. It is present primarily among people in southeast Siberia, north Korea, and China<sup>3</sup>. KBD is prevalent in 377 counties of 14 provinces in China, with 0.64 million cases<sup>4</sup>. KBD occurs in childhood and involves pathologic changes of metaphysis and epiphyseal plate, resulting in multiple symptoms in the growth and the articular cartilages such as bony deformity, joints enlargement, growth retardation and functional impairment in multiple joints. The resulting disability causes an important human and social economic burden to both affected children and adults. Moreover, KBD can also cause disturbances in the cartilage metabolism, the lipid peroxidation, and sulfur and selenium metabolism<sup>5,6</sup>. So far, some measures exist for treatment of KBD because of the incomplete ability of the cartilage to repair itself. Treatment strategies for symptomatic relief include non-steroidal anti-inflammatory drugs<sup>7</sup>, sodium hyaluronate<sup>8</sup>, physical therapy<sup>9</sup> and chondroitin sulfate combined with glucosamine<sup>10</sup>. Successful surgical treatments to correct joint defects have been reported by orthopaedists<sup>11,12</sup>.

Although the etiology of KBD is multifactorial, one of the major environmental risk factors is selenium deficiency<sup>13</sup>. Since the 1970s, selenium supplements have been given in some highly endemic areas. A meta-analysis including five randomized control trials (RCTs) and 10 non-RCTs demonstrated the benefits of selenium supplementation for the primary prevention of KBD in children<sup>14</sup>. Another systematic review suggested that sodium selenite (Se) was effective for the treatment of patients already affected with KBD<sup>15</sup>. Besides Se tablet, there are other selenium supplements used for treating KBD, including selenium salts (Se salt), selenium enriched yeast (Se yeast), the combination of sodium selenite with vitamin E (Se + VE), and the combination of sodium selenite with vitamin C (Se + VC). At the time of



our review, there were few head-to-head comparisons of different types of selenium supplementation for treatment of KBD. In light of the need for government policy makers and clinical care workers to know the effects of a set of alternative options, we conducted a systematic review and network meta-analysis (NMA). The aim of this systematic review and NMA was to compare the effectiveness of all types of selenium supplementation for the treatment of patients with KBD, and rank these selenium supplementation based on their performance.

## Method

A protocol for this systematic review was devised in accordance with the PRISMA guidelines and registered on PROSPERO, and the trial registration number was CRD42016051874.

### *Search strategy*

We searched, without language restrictions, for all publications between January 1, 1966 and March 31, 2017 using electronic databases, which included MEDLINE, EMBASE, The Cochrane Central Register of Controlled Trials, The Cochrane Database of Systematic Reviews, The Chinese Biomedical Database, Chinese National Knowledge Infrastructure, Chinese Science and Technique Journals Database, and Wan Fang database. The following MeSH words and free words were used: “Kashin-Beck disease,” “Kashin-Beck disease,” “big bone disease,” “endemic osteoarthritis,” “Urov disease” and “selenium,” “Sodium selenite,” and “Se”. The Ovid search strategy is available in Appendix box 1. Reference lists from published narrative review articles and systematic reviews were reviewed to identify additional studies.

### *Eligibility criteria*

We included all randomized, controlled trials (RCTs) that used Se tablet and other types of selenium supplements including Se salt, Se yeast, Se + VE, as well as Se + VC for KBD

1  
2  
3  
4 patients. The control groups included placebo or no treatment controls, or other active medi-  
5  
6 cines. The diagnostic criteria used for KBD was based on the Diagnosis Criteria for Kashin-  
7  
8 Beck Disease (GB16003-1995), which was developed by National Health and Family Plan-  
9  
10 ning Commission of the People's Republic of China<sup>16</sup>. We excluded the following studies: (1)  
11  
12 studies with small sample sizes (numbers of patients less than 20 in each treatment group);  
13  
14 (2) preventive studies; (3) studies without available information of interest. Studies reporting  
15  
16 mixed groups of participants (e.g., participants with and without KBD) were included only if  
17  
18 the therapeutic effect data could be identified and extracted separately. Outcome of interest to  
19  
20 this review was the repair rate of metaphyseal lesions on X-ray film. Typically, repair was  
21  
22 defined as being cured basically or improved significantly of metaphyseal lesions according  
23  
24 to the latest judgment standard of X-ray for treatment effect of KBD<sup>17</sup>.

### 25 26 27 28 ***Data extraction and quality evaluation***

29  
30 Two authors (Y. L & D. X) independently screened all citations identified by the searches.  
31  
32 Full-text articles of potential studies were obtained and assessed according to the aforemen-  
33  
34 tioned inclusion criteria. The data extraction form included publication (first author, year of  
35  
36 publication), demographics (sample size and age), interventions (dosage, route of administra-  
37  
38 tion, and duration of treatment), the follow-up period, as well as outcomes. We extracted data  
39  
40 to the nearest 12 months to estimate the overall odds ratio (OR) because all the included  
41  
42 RCTs report this time point. Two reviewers independently evaluated the methodological qual-  
43  
44 ity of individual study according the Cochrane risk-of-bias tool<sup>18</sup>. In our review, we applied  
45  
46 the GRADE system to our NMA based on the GRADE working group<sup>19</sup>. The methods of rat-  
47  
48 ing the quality of direct comparison are the same for GRADE in traditional meta-analysis.  
49  
50 We downgraded the evidence from “high quality” by one level for serious (or by two for very  
51  
52 serious) study limitations (risk of bias), indirectness of evidence, inconsistency, imprecision  
53  
54  
55  
56  
57  
58  
59  
60

1  
2  
3  
4 of effect estimates or potential publication bias. The rating of the quality of the indirect esti-  
5 mates is based on the ratings of the two pair-wise estimates that contributes to the indirect  
6 estimate of the comparison of interest. The lower confidence rating of the two direct compar-  
7 isons constitutes the confidence rating of the indirect comparison. When both direct and indi-  
8 rect evidence are available, we used the higher of the two quality ratings as the quality rating  
9 for the NMA estimate. In addition, we needed to consider the intransitivity among different  
10 groups and the inconsistency between direct comparison and indirect comparison. Further-  
11 more, we used the GRADE profiler to help us create "Summary of findings" tables  
12 (GRADEpro 2008), and reported outcomes in this tables. Any disagreements would be re-  
13 solved by consulting a third author (J.Y).

### 24 *Statistical analysis*

25  
26  
27  
28 As the repair rate of metaphyseal lesions on X-ray film, the outcome of interest in this  
29 text, was a discontinuous statistics, we calculated the OR and its 95% confidence intervals  
30 (CI) as the effect estimates. Initially, we performed standard pair-wise meta-analyses for all  
31 available direct comparisons using a random effects model in STATA. Statistical heterogenei-  
32 ty of treatment effects across studies was assessed by the Cochrane Q test, and the extent of  
33 between-study heterogeneity was quantified by  $I^2$ , of which with a value greater than 50%  
34 indicates substantial heterogeneity. Then we conducted a random effects model network me-  
35 ta-analysis in STATA to determine comparative effectiveness of each intervention by using  
36 the network command and self-programmed STATA routines available at  
37 <http://www.mtm.uoi.gr>. We present the mean effect sizes for the network estimates (OR)  
38 along with their 95% confidence intervals (CI) and predictive intervals (PrI). The PrI shows  
39 the degree of uncertainty around estimated treatment effects.

40  
41  
42  
43 To evaluate consistency in the entire network, we used the 'design-by-treatment' model,  
44  
45  
46  
47  
48  
49  
50  
51  
52  
53

1  
2  
3  
4 which was described by Higgins and colleagues, by using the network meta command in  
5  
6 STATA. This method accounts for different source of inconsistency that can occur when stud-  
7  
8 ies with different designs (two-arm trials vs. three-arm trials) give different results as well as  
9  
10 disagreement between direct and indirect evidence. We inferred about the presence of incon-  
11  
12 sistency from any source in the entire network based on a chi-square test, and a P value great-  
13  
14 er than 0.05 indicated that the direct and indirect comparisons in the network were consistent.  
15  
16 We also estimated the ranking probabilities for all treatments of being at each possible rank.  
17  
18 Rankings were obtained by using the surface under the cumulative ranking curve (SUCRA)  
19  
20 values and mean ranks. SUCRA could be expressed as a percentage interpreted as the per-  
21  
22 centage of effectiveness of a treatment that would be ranked first without uncertainty. To de-  
23  
24 rive these SUCRA values we used the ranking probabilities estimated from the mvmeta  
25  
26 command.  
27  
28  
29

## 30 **Results**

### 31 *Study inclusion and characteristics*

32  
33  
34 Initial searches yielded 1686 citations. Of these, 1645 duplicate or irrelevant records were  
35  
36 excluded and full-text articles of the remaining 41 studies were retrieved for further assess-  
37  
38 ment according to the inclusion criteria. A total of 15 studies<sup>20-34</sup> containing 2931 patient were  
39  
40 included eventually in our meta-analysis (Fig 1). We excluded 26 trials for the reasons docu-  
41  
42 mented in the Characteristics of excluded studies table (Appendix table 1).  
43  
44

45  
46 A total of seven interventions were evaluated: Se, Se salt, Se yeast, Se + VE, Se + VC, VC,  
47  
48 and placebo. Figure 2 shows the network of all treatment comparisons included in this re-  
49  
50 view. The age of participants range from 2 to 16 years old and the duration of follow-up var-  
51  
52 ied from 6 months to 36 months. The main characteristics of the included studies were simi-  
53  
54 lar, and the characteristics (e.g. interventions dosage, route of administration, duration of  
55  
56  
57  
58  
59

treatment, the follow-up period, and outcomes) are presented in the online supplementary Appendix table 2.

### ***Overall assessment for evidence quality***

All included trials were reported to be RCTs. The quality of included studies was overall low. Study quality for each study can be seen in Appendix table 3. We downgraded this outcome from high to low or very low quality for possible bias, inconsistency, or imprecision. Overall assessment for evidence quality was seen in table 1.

**Table 1 Quality ratings for comparison of different interventions**

| Comparison           | Quality of direct evidence | Quality of Indirect evidence | Quality of network meta-analysis evidence |
|----------------------|----------------------------|------------------------------|-------------------------------------------|
| Se vs. placebo       | Low*,†                     | Low*,#                       | Low*,†                                    |
| Se salt vs. placebo  | Low*,†                     | Low*,#,                      | Low*,†                                    |
| Se+VC vs. placebo    | Moderate*                  | Low*,#                       | Moderate*                                 |
| Se+VE vs. placebo    | Very low*,†,‡              | Low*,#                       | Low*,#                                    |
| Se yeast vs. placebo | Moderate*                  | Low*,#                       | Moderate*                                 |
| VC vs. placebo       | Moderate*                  | Low*,#                       | Moderate*                                 |
| Se salt vs. Se       | —                          | Very low*,‡,¶                | Very low*,‡,¶                             |
| Se+VC vs. Se         | Moderate*                  | Low*,‡                       | Moderate*                                 |
| Se+VE vs. Se         | —                          | Very low*,‡,¶                | Very low*,‡,¶                             |
| Se yeast vs. Se      | Moderate*                  | Very low*,‡,¶                | Moderate*                                 |
| VC vs. Se            | Moderate*                  | Low*,¶                       | Moderate*                                 |
| Se+VC vs. Se salt    | Low*,‡                     | Low*,¶                       | Low*,¶                                    |
| Se+VE vs. Se salt    | —                          | Very low*,‡,¶                | Very low*,‡,¶                             |
| Se yeast vs. Se salt | —                          | Very low*,‡,¶                | Very low*,‡,¶                             |
| VC vs. Se salt       | Low*,‡                     | Very low*,‡,¶                | Low*,¶                                    |
| Se+VE vs. Se+VC      | —                          | Very low*,‡,¶                | Very low*,‡,¶                             |
| Se yeast vs. Se+VC   | —                          | Very low*,‡,¶                | Very low*,‡,¶                             |
| VC vs. Se+VC         | Moderate*                  | Very low*,‡,¶                | Moderate*                                 |
| Se yeast vs. Se+VE   | —                          | Very low*,‡,¶                | Very low*,‡,¶                             |
| VC vs. Se+VE         | —                          | Very low*,‡,¶                | Very low*,‡,¶                             |

|                 |   |                              |                              |
|-----------------|---|------------------------------|------------------------------|
| VC vs. Se yeast | — | Very low <sup>*,‡,¶,¶¶</sup> | Very low <sup>*,‡,¶,¶¶</sup> |
|-----------------|---|------------------------------|------------------------------|

\*Limitations (risk of bias). †Inconsistency. ‡Imprecision. #Inconsistency: predictive intervals for treatment effect include effects that would have different interpretations. ¶Indirectness: no convincing evidence for the plausibility of the transitivity assumption.

Se = Sodium selenite, Se salt = selenium salt, VC = vitamin C, Se + VC = the combination of sodium selenite with vitamin C ; Se + VE = the combination of sodium selenite with vitamin E, Se yeast = selenium enriched yeast

### ***Intervention-control pair-wise meta-analyses***

All RCTs reported repair rate of metaphyseal lesions on X-ray films. Follow-up duration of included RCTs were varied. We extracted data to the nearest 12 months to estimate the overall OR. When compared to placebo, the pooled OR (random effects model) of X-ray improvement was in favor of Se (OR 5.0, 95% CI: 3.21 - 7.78,  $P < 0.001$ ), Se salt (OR 7.6, 95% CI: 2.34 - 24.67,  $P = 0.001$ ), Se enriched yeast (OR 3.75, 95% CI: 1.76 - 8.02,  $P = 0.001$ ), and Se + VE (OR 11.05, 95% CI: 2.61 - 46.80,  $P = 0.03$ ) respectively, which indicated that repairing rate of metaphyseal lesions on X-ray films was significantly higher for these drugs than placebo. Summary of findings for each selenium supplements compare to placebo was seen in table 2. A few RCTs reported direct comparisons among active interventions. There were two RCTs compared Se with VC, and the result of traditional meta-analysis showed that no significant difference was found between Se and VC<sup>23,31</sup>. For Se+ VC compared to VC, the pooled OR of two RCTs also showed no significant difference existed (OR 1.15, 95% CI: 0.51 - 2.63,  $P=0.93$ )<sup>31,33</sup>. There was only one RCT for Se vs. Se + VC<sup>31</sup>, Se vs. Se yeast<sup>26</sup>, Se salt vs. Se + VC<sup>31</sup>, Se salt vs. VC<sup>31</sup>, respectively. OR of X-ray improvement was significantly higher in Se salt group compared with Se + VC (OR 6.00, 95% CI: 1.81 - 19.93,  $P=0.003$ ) and VC alone (OR 4.24, 95% CI: 1.39 - 12.90,  $P=0.011$ ). There were no significant differences noted in other active interventions comparisons (See table 3).

**Table 2 Summary of findings****Patient or population:** Treatment of Kashin-Beck disease in children**Outcomes:** Improvement of metaphyseal lesions on X-ray

Intervention: See list Comparison: placebo

| Intervention/Comparison:     | Anticipated absolute effects* (95% CI) |                                   | Relative effect (95% CI)        | No of participants (studies) | Quality of the evidence (GRADE)   |
|------------------------------|----------------------------------------|-----------------------------------|---------------------------------|------------------------------|-----------------------------------|
|                              | ● Risk with placebo                    | ● Risk with Se                    |                                 |                              |                                   |
| Se compared to placebo       | 422 per 1,000                          | <b>785 per 1,000</b> (701 to 850) | <b>OR 5.00</b> (3.21 to 7.78)   | 2427 (11 RCTs)               | ⊕⊕○○<br>LOW <sup>a,b</sup>        |
| Se salt compared to placebo  | 345 per 1,000                          | <b>800 per 1,000</b> (552 to 928) | <b>OR 7.60</b> (2.34 to 24.67)  | 59 (1 RCT)                   | ⊕⊕○○<br>LOW <sup>a,c</sup>        |
| Se+VC compared to placebo    | 345 per 1,000                          | <b>401 per 1,000</b> (181 to 668) | <b>OR 1.27</b> (0.42 to 3.83)   | 54 (1 RCT)                   | ⊕⊕⊕○<br>MODERATE <sup>a</sup>     |
| Se+VE compared to placebo    | 451 per 1,000                          | <b>901 per 1,000</b> (682 to 975) | <b>OR 11.05</b> (2.61 to 46.80) | 145 (2 RCTs)                 | ⊕○○○<br>VERY LOW <sup>a,b,c</sup> |
| Se yeast compared to placebo | 383 per 1,000                          | <b>700 per 1,000</b> (522 to 833) | <b>OR 3.75</b> (1.76 to 8.02)   | 120 (1 RCT)                  | ⊕⊕⊕○<br>MODERATE <sup>a</sup>     |
| VC compared to placebo       | 339 per 1,000                          | <b>509 per 1,000</b> (334 to 681) | <b>OR 2.02</b> (0.98 to 4.17)   | 124 (2 RCTs)                 | ⊕⊕⊕○<br>MODERATE <sup>a</sup>     |

\*The risk in the intervention group (and its 95% confidence interval) is based on the assumed risk in the comparison group and the relative effect of the intervention (and its 95% CI).

CI: Confidence interval; OR: Odds ratio

**GRADE Working Group grades of evidence**

**High quality:** We are very confident that the true effect lies close to that of the estimate of the effect

**Moderate quality:** We are moderately confident in the effect estimate: The true effect is likely to be close to the estimate of the effect, but there is a possibility that it is substantially different

**Low quality:** Our confidence in the effect estimate is limited: The true effect may be substantially different from the estimate of the effect

**Very low quality:** We have very little confidence in the effect estimate: The true effect is likely to be substantially different from the estimate of effect

a. Limitations (risk of bias): no studies described adequate methods regarding the sequence of randomization and reported allocation concealment. Some studies did not use of a blinding method and ITT analysis.

b. Inconsistency: small sample size or have a higher I<sup>2</sup>, or both.

c. Imprecision: the effects are large but the overall sample size are low.

**Table 3 Results of pair-wise and network meta-analyses of repairing rate of metaphyseal lesions on X-ray films**

| <b>OR (95% CI) #</b> | <b>Placebo</b>                                  | <b>Se</b>                                  | <b>Se salt</b>                             | <b>Se + VC</b>                             | <b>Se + VE</b>           | <b>Se yeast</b>         |
|----------------------|-------------------------------------------------|--------------------------------------------|--------------------------------------------|--------------------------------------------|--------------------------|-------------------------|
| <b>Se</b>            | 4.68 (2.99 to 7.34)*<br>5.00 (3.21 to 7.78)     | -                                          | -                                          | -                                          | -                        | -                       |
| <b>Se salt</b>       | 12.37 (2.81 to 54.41)*<br>7.60 (2.34 to 24.67)  | 2.64 (0.59 to 11.84)<br>-                  | -                                          | -                                          | -                        | -                       |
| <b>Se + VC</b>       | 3.26 (1.14 to 9.28)*<br>1.27 (0.42 to 3.83)     | 0.70 (0.25 to 1.97)<br>1.30 (0.57 to 2.94) | 0.26 (0.06 to 1.20)<br>0.17 (0.05 to 0.55) | -                                          | -                        | -                       |
| <b>Se + VE</b>       | 10.72 (3.14 to 36.57)*<br>11.05 (2.61 to 46.80) | 2.29 (0.62 to 8.43)<br>-                   | 0.87 (0.13 to 5.93)<br>-                   | 3.29 (0.65 to 16.53)<br>-                  | -                        | -                       |
| <b>Se yeast</b>      | 5.81 (1.70 to 19.89)*<br>3.75 (1.76 to 8.02)    | 1.24 (0.36 to 4.25)<br>1.92 (0.90 to 4.00) | 0.47 (0.07 to 3.16)<br>-                   | 1.78 (0.37 to 8.66)<br>-                   | 0.54 (0.10 to 3.08)<br>- | -                       |
| <b>VC</b>            | 3.05 (1.29 to 7.20)*<br>2.02 (0.98 to 4.17)     | 0.65 (0.28 to 1.53)<br>0.95 (0.51 to 1.79) | 0.25 (0.06 to 1.06)<br>0.24 (0.08 to 0.72) | 0.94 (0.34 to 2.56)<br>0.87 (0.38 to 1.96) | 0.28 (0.06 to 1.27)<br>- | 0.52(0.12 to 2.27)<br>- |

# ORs represent odds of repair in row-treatment versus column-treatment. ORs larger than 1 denote higher repair rate in row-treatment than column-treatment. In each cell, the first line represents the result of network meta-analyses, and the second row represents the result of pair-wise meta-analyses. OR = Odds ratio, CI = Confidence intervals, Se = Sodium selenite, Se salt = selenium salt, VC = vitamin C, Se + VC = the combination of sodium selenite with vitamin C ; Se + VE = the combination of sodium selenite with vitamin E, Se yeast = selenium enriched yeast



### Results of network meta-analyses and consistency test

The pooled OR and 95% CI of X-ray improvement for active treatment compared with placebo was 4.68 (2.99 to 7.34) for Se, 12.37 (2.81 to 54.41) for Se salt, 5.81 (1.70 to 19.89) for Se enriched yeast, 10.72 (3.14 to 36.57) for Se + VE, and 3.26 (1.14 to 9.28) for Se + VC respectively, which indicated a significant difference in efficacy. For the comparison between active treatments, no significant differences were found. More details were presented in Table 3. In Figure 3, we presented the OR for the network estimates along with 95% CI and PrI.

There was no inconsistency between direct and indirect evidences according to the design-by-treatment interaction model ( $P=0.88$ ), implying that direct and indirect evidence were mainly consistent (Fig 4). However, the results of the comparison of Se + VC and VC versus placebo showed some degree of inconsistency. Actually, the lower CI for X-ray improvement were nearly equal to 1 (1.13 for Se + VC and 1.27 for VC), showing a trend to coincide with direct results.

Table 4 displayed the distribution of probabilities for each treatment being ranked for their efficacy in KBD according the SUCRA values (Fig 5) and mean ranks.

**Table 4 Probabilistic ranking of effectiveness of different interventions**

| Interventions | Probabilistic ranking |             |           |
|---------------|-----------------------|-------------|-----------|
|               | SUCRA (%)             | Pr Best (%) | Mean Rank |
| Se salt       | 86                    | 49.1        | 1.8       |
| Se+VE         | 82.8                  | 38.5        | 2         |
| Se yeast      | 62.5                  | 11.6        | 3.3       |
| Se            | 52.5                  | 0.2         | 3.9       |
| Se+VC         | 35.7                  | 0.4         | 4.9       |
| VC            | 30.1                  | 0.2         | 5.2       |

|         |     |   |   |
|---------|-----|---|---|
| Placebo | 0.5 | 0 | 7 |
|---------|-----|---|---|

SUCRA=surface under cumulative ranking, Se = Sodium selenite, Se salt = selenium salt, VC = vitamin C, Se + VC = the combination of sodium selenite with vitamin C ; Se + VE = the combination of sodium selenite with vitamin E, Se yeast = selenium enriched yeast.

Se salt was ranked the most effective followed by Se+VE, Se-yeast, Se and then Se + VC. VC and placebo as a control was ranked the least effective.

## Discussion

### *Principal findings*

Our network meta-analysis of all 15 available RCTs in 2931 patients with KBD showed that all five kinds of selenium supplementation (including Se, Se salt, Se enriched yeast, Se + VE, Se + VC) were superior to placebo/no treatment in repairing metaphyseal lesions. There was uncertainty around the difference between two active treatments. However, the probabilistic ranking of interventions showed that Se salt was ranked the most effective, followed by Se + VE, Se enriched yeast, Se and then Se + VC.

### *Relation to other studies*

Studies have proposed that selenium deficiency is the underlying factor that predisposes the target cells (chondrocytes) to oxidative stress from free-radical carriers<sup>35</sup>. In most highly endemic area, the level of total soil selenium concentrations is typically low. A meta-analysis of the correlation between selenium and KBD reported that selenium levels in water, soil, cereal, and corn in endemic regions were lower than regions without high rates of KBD<sup>36</sup>. Furthermore, most of the inhabitants living in areas with KBD have a low selenium nutritive status, which is reflected by low selenium contents in their blood serum, red blood cell, urine, and hair.

The effectiveness of various methods of selenium supplementation for children has been

1  
2  
3  
4 demonstrated by many studies including Se salt<sup>37</sup>, Se enriched yeast<sup>26</sup>, oral sodium selenite  
5 tablet<sup>15</sup>, spraying Se on crops<sup>38</sup>, and Se enriched fertilizer<sup>39</sup>. Selenium supplementation was  
6 associated with a simultaneous decrease in the prevalence of KBD, along with an increased  
7 selenium content in the hair of inhabitants living in areas with KBD. It was reported that the  
8 incidence of radiographic evidence of metaphysical lesions of the hands was 44.8% in 1990  
9 at Cuimu town of the Shaanxi province in children aged 7~12 years. After implementation of  
10 comprehensive prevention measures of KBD, especially using Se salt, the incidence these x-  
11 ray findings decreased to 0.3% in 2010<sup>40</sup>. The low incidence of KBD also may explain why  
12 there has not been any studies about Se treatment for KBD published in recent years.  
13  
14  
15  
16  
17  
18  
19  
20  
21  
22

23  
24 Se salt was produced by adding 0.833 g of sodium selenite powder into every 50 kg of  
25 source salt and then expanding it to 1:60,000 Se salt. In our study, the probabilistic ranking of  
26 interventions showed that Se salt was ranked the most effective. This result was not surpris-  
27 ing because of the high compliance for salt intake. Although administration of Se tablet is  
28 effective for preventing and treating KBD in children<sup>14,15</sup>, it is very difficult for millions of  
29 children living in endemic areas to adhere to a long-term medication. However, salt is a nec-  
30 essary part of daily life and food intake. The compliance can be more effectively guaranteed.  
31 A limitation to the findings about Se salt is that due to the difficulty of carrying out a RCT  
32 comparing Se salt with placebo or other active drugs, only one RCT has been done<sup>31</sup>. Howev-  
33 er, one meta-analysis involving 11 non-RCTs (2652 participants) also showed that supple-  
34 ment Se salt was effective for preventing and treatment for KBD in Children<sup>37</sup>. Since Se salt  
35 is the most economical way for low-income families, it is anticipated that continuous use of  
36 Se salt and other comprehensive prevention measures may help to eliminate the KBD carti-  
37 lage damages in Children<sup>41</sup>.  
38  
39  
40  
41  
42  
43  
44  
45  
46  
47  
48  
49  
50  
51  
52

53  
54 Despite the evidence in our meta-analysis, there remains some controversy around sele-  
55  
56  
57  
58  
59  
60

1  
2  
3  
4 nium supplementation in relationship with iodine deficiency. In a cross sectional study in Ti-  
5 bet area, Moreno-Reyes and his colleges found no association between individual selenium  
6 status and KBD, whereas iodine deficiency was a risk factor<sup>42</sup>. Similarly, the only RCT<sup>32</sup>  
7 published in English in our review showed only 1 case of improvements in X-ray in sodium  
8 selenite group. The negative findings of the above studies should, however, be interpreted  
9 with caution. These studies were all conducted in Tibet where selenium and iodine are both  
10 deficient in the diet. Selenium and iodine deficiency are both risk factors of KBD<sup>35</sup>. In animal  
11 experiments, growth retardation was observed in rats fed with a low selenium diet<sup>43</sup>, and im-  
12 paired bone development was observed with an iodine deficient diet<sup>44</sup>. We do not exclude the  
13 possibility that selenium supplementation may not counterbalance the negative effects of  
14 long-term iodine deficiency. So KBD seems unlikely to be due to only one cause. Other ge-  
15 netic and environmental factors may confer either a relatively protective effect or accelerate  
16 the disease.

### 31 32 ***Limitations of the trials included in this review***

33  
34 Overall, the methodological quality of the included trails was low. The method of ran-  
35 domization and allocation concealment were not described in all the included trials. Double-  
36 blinding was reported in 8 trials and details of the blinding methods were reported in 3 trials.  
37 Withdrawal rates of participants were less than 20% in 8 trails. Only Six trials performed  
38 intention to treat analysis.

39  
40 After assessment of the overall quality of the evidence, we downgraded our primary  
41 outcomes from high to low or very low quality, because of the high risk of bias due to unclear  
42 sequence generation and allocation concealment. In addition, we also found in some trials  
43 that there were very small sample sizes and higher levels of statistical heterogeneity, which  
44 caused serious inconsistency between the included trials.

### *Strengths and weaknesses*

The present NMA integrated evidence from direct and indirect comparisons. Consequently, estimates in our analysis were more precise than the pair-wise meta-analyses. The literature search strategy was extensive, which makes it unlikely that we missed any relevant trial. Trial selection and data extraction including quality assessments were done independently by two authors to minimize bias and transcription errors. In this NMA, we applied the GRADE system to NMAs based on the GRADE working group to rate the quality of the evidence.

Potential limitations to this review exist. Firstly, the sample sizes of our included RCTs were all small. Sample size calculations were not mentioned in any of the studies. Secondly, despite our exhaustive search, only 15 RCTs conducted in China were included in this review. North Korea and Russia also have a high incidence of KBD; some trials may have been published in local journals that were missed in our search. Finally, the heterogeneity in this meta-analysis was somewhat high, which could be explained by a lack of concealment of allocation, failure to perform an ITT analysis, small sample sizes of the studies included and differences between different preparations of selenium. As with heterogeneity between trials, inconsistency between direct and indirect comparisons was also near zero. Although we cannot rule out clinically relevant inconsistency, we have no indication that clinical characteristics of included patients or other trial characteristics confounded the indirect comparisons.

### **Conclusions**

#### *Implications for clinical practice*

Based on this NMA, it appears that all types of Se supplementation were more effective than placebo for the treatment of KBD in children. Ranking on efficacy indicated that Se salt were highest, followed by Se + VE, Se enriched yeast, Se, Se + VC, VC, and placebo/no

1  
2  
3  
4 treatment. Se salt was ranked the most effective. It can be an economical and convenient  
5  
6 strategy for controlling KBD in endemic areas. However, selenium over-dose is toxic. There-  
7  
8 fore, suitable dosages should be strictly controlled and content of selenium should be closely  
9  
10 monitored in order to avoid harmful effects on health. Since the overall quality of the evi-  
11  
12 dence was low or very low, the SUCRA values may be misleading and should be considered  
13  
14 jointly with the GRADE confidence in the estimates for each comparison.  
15  
16

### 17 18 19 ***Implications for research***

20  
21 Since KBD among children has almost disappeared, we believe it unlikely that future tri-  
22  
23 als will involve a RCT to demonstrate the clinically relevant benefit of any selenium supple-  
24  
25 mentation for children with KBD. At present, there are no effective clinical measures to re-  
26  
27 pair the cartilage damage of KBD in adults. Tissue engineering and gene therapy approaches  
28  
29 may become the potential treatment strategy that can applied to the treatment of the KBD car-  
30  
31 tilage damages.  
32  
33  
34  
35

### 36 37 **Contributors**

38  
39 Dongmei Xie and Yulin Liao conceived the review question, reviewed studies for inclusion,  
40  
41 assessed the included studies, extracted data, completed the first draft, and edited the review.  
42  
43 Jirong Yue and Chao Zhang analyzed the data, did the literature search, advised and coordi-  
44  
45 nated the review development, performed part of the writing and editing of the review, ap-  
46  
47 proved the final version of the review prior to submission, and is also a guarantor. Yanyan  
48  
49 Wang, Chuanyao Deng and Ling Chen contributed to the development of the review ques-  
50  
51 tion, edited and provided intellectual contributions to the review.  
52  
53  
54  
55  
56  
57  
58  
59  
60

**Funding Statement:** This research was funded by China National Science & Technology Pillar Program (2007BA125B04).

**Conflict of interest:** We declare that we have no conflicts of interest.

**Role of the funding source:** The sponsors of the study had no role in study design, data collection, data analysis, data interpretation, or writing of the report. The corresponding author had full access to all the data in the study and had final responsibility for the decision to submit for publication.

**Acknowledgments:** Dr. Joseph H. Flaherty is especially acknowledged for editorial review and language assistance.

#### **Reference:**

1. Mathieu F, Begaux F, Lan ZY, Suetens C, Hinsenkamp M. Clinical manifestations of Kashin-Beck disease in Nyemo Valley, Tibet. *Int Orthop* 1997;21:151-6.
2. Sokoloff L. The history of Kashin-Beck disease. *N Y State J Med* 1989;89:343-51.
3. Allander E. Kashin-Beck disease. An analysis of research and public health activities based on a bibliography 1849-1992. *Scand J Rheumatol Suppl* 1994;99:1-36.
4. P. R. C. Ministry of Health. The prevention and control status of Kashin-Beck disease in 2011. Available at: <http://www.nhfpc.gov.cn/htmlfiles/zwgkzt/ptjnj/year2012/index2012.html>;2012.
5. Xiong G. Diagnostic, clinical and radiological characteristics of Kashin-Beck disease in Shaanxi Province, PR China. *Int Orthop* 2001;25:147-50.
6. Peng A, Yang C, Rui H, Li H. Study on the pathogenic factors of Kashin-Beck disease. *J Toxicol Environ Health* 1992;35:79-90.
7. Luo R, Liu G, Liu W, Pei F, Zhou Z, Li J, et al. Efficacy of celecoxib, meloxicam and paracetamol in elderly Kashin-Beck disease (KBD) patients. *International orthopaedics* 2011;35:1409-14.
8. Yu FF, Xia CT, Fang H, Han J, Younus MI, Guo X. Evaluation of the therapeutic effect of treatment with intra-articular hyaluronic acid in knees for Kashin-Beck disease: A meta-analysis. *Osteoarthritis Cartilage* 2014;22:718-25.
9. Mathieu F, Suetens C, Begaux F, De Maertelaer V, Hinsenkamp M. Effects of physical therapy on patients with Kashin-Beck disease in Tibet. *Int Orthop* 2001;25:191-3.
10. Yue J, Yang M, Yi S, Dong B, Li W, Yang Z, et al. Chondroitin sulfate and/or glucosamine hydrochloride for Kashin-Beck disease: a cluster-randomized, placebo-controlled study. *Osteoarthritis*

1  
2  
3  
4 and cartilage 2012;20:622-9.

5  
6 11. Zhongmin T, Yang L, Zhou J, Gao D, Dong S, Xie J, et al. Comparison of treatment results of  
7 arthroscopic knee debridement alone with a combination of arthroscopic debridement and drilling  
8 decompression in knee Kashin-Beck disease (in Chinese). *Chin J Endo* 2009;371-4.

9  
10 12. Liu FD, Wang ZL, Hinsenkamp M. Osteotomy at the knee for advanced cases of Kashin-Beck  
11 disease. *Int Orthop* 1998;22:87-91.

12  
13 13. Guo X, Ma WJ, Zhang F, Ren FL, Qu CJ, Lammi MJ. Recent advances in the research of an en-  
14 demic osteochondropathy in China: Kashin-Beck disease. *Osteoarthritis Cartilage* 2014;22:1774-83.

15  
16 14. Zou K, Liu G, Wu T, Du L. Selenium for preventing Kashin-Beck osteoarthropathy in children: a  
17 meta-analysis. *Osteoarthritis Cartilage* 2009;17:144-51.

18  
19 15. Jirong Y, Huiyun P, Zhongzhe Y, Birong D, Weimin L, Ming Y, et al. Sodium selenite for treat-  
20 ment of Kashin-Beck disease in children: A systematic review of randomised controlled trials. *Osteo-  
21 arthritis and Cartilage* 2012;20:605-13.

22  
23 16. National Health and Family Planning Commission of the People's Republic of China. Diagnostic  
24 criteria of Kashin-Beck disease (GB16003-1995).[1995-12-15]

25  
26 17. Liang S, Zhang F, Wang L, Yang Y, Lu X, Chen C. The effect of the treatment of Kaschin Beck  
27 disease (in Chinese). *Chin J Endo* 1996;15:378-80.

28  
29 18. Higgins J, Green S. *Cochrane Handbook for Systematic Reviews of Interventions* (Version  
30 5.1.0). The Cochrane Collaboration, 2011. Available at: <http://www.cochrane-handbook.org>.

31  
32 19. Puhan MA, Schünemann HJ, Murad MH, Li T, Brignardello-Petersen R, Singh JA, et al. A  
33 GRADE Working Group approach for rating the quality of treatment effect estimates from network  
34 meta-analysis. *BMJ* 2014; 349:g5630.

35  
36 20. Niu GH, Zhang BH, Song ZY, Pang ZG, Wang YY, Ma QH. An observation study on effect of  
37 oral sodium selenite for prevention and treatment of kashin-beck effect (in Chinese). *Heilongjiang  
38 Med J* 1981;15-7.

39  
40 21. Disease TYSSGoK-B. Effect and mechanism of selenium in the prevention and cure of 424  
41 Kashin-Beck's patients (in Chinese). *Chin J Endemiol* 1982;1:145-50.

42  
43 22. Wang DS, Fu BS, Sun QY, Yang WZ, Bao BJ, Huang FH, et al. Dynamic observation of sodium  
44 selenite and vitamin E in the treatment of Kashin Beck disease (in Chinese). *Chin J Endemiol*  
45 1983;2:204-7.

46  
47 23. Cui ZJ, Lin BH, Jin CS, Lin JZ. An observation on effect of the treatment of Kaschin-Beck dis-  
48 ease using Vitamin C or sodium selenite (in Chinese). *End Dis Bull* 1984;1:63.

49  
50 24. Niu GH, Zhang BZ, Li XZ, Liu JX, Zhu ZY, Hou SF. Results of study of two years on the pre-  
51 venting and controlling Kashin-Beck's disease with selenium seen under X-rays and discussion of  
52 etiology (in Chinese). *Chin J Endemiol* 1984;3:199-201.



- 1
- 2
- 3
- 4 25. Guo LB, Lu Q, Tang HF, Lei H, Dong HQ. An one year observation by X-ray on effect of the
- 5 treatment of Kaschin-Beck disease using oral sodium selenite (in Chinese). *J Chengde Univ Med Sci*
- 6 1985;67-70.
- 7
- 8 26. Guo LB, Lu Q, Dong HQ, Tang HF, Lei H, Zhang ZM, et al. One year of observation on effect of
- 9 selenium enriched yeast for treatment of Kaschin Beck disease (in Chinese). *Chin J Endemiol*
- 10 1986;5:16-20.
- 11
- 12 27. Niu GH, Zhang BZ, Hou SF, Zhu ZY, Li DZ, Zhong PL, et al. Study of two years on the prevent-
- 13 ing and controlling Kashin-Beck's disease with oral sodium selenite seen under X-rays (in Chinese). *J*
- 14 *Pract Endemio* 1986;1:16-8.
- 15
- 16 28. Wu QX. An observation by X-ray on effect of the prevention and treatment of Kaschin-Beck dis-
- 17 ease using oral sodium selenite (in Chinese). *Chin J Endemiol* 1986;5:210-20.
- 18
- 19 29. Deng JY. Effect of sodium selenite oral application on Kashin-Beck disease, a three years obser-
- 20 vation (in Chinese). *Chin J Endemiol* 1988;7:117-20.
- 21
- 22 30. Niu GH, Zhang BZ, Hou SF. Effect of semis-dosage selenium on controlling of Kashin-Beck
- 23 disease (in Chinese). *Chin J Endemiol* 1990:99-100.
- 24
- 25 31. Zhou XK, Wang WL, Wang EQ, Yu AL, Ren YG, Xu JM, et al. The observation on effecto of
- 26 selenium and vitamin C for treating Kaschin Beck disease (in Chinese). *End Dis Bull* 1991:100-3.
- 27
- 28 32. Moreno-Reyes R, Mathieu F, Boelaert M, Begaux F, Suetens C, Rivera MT, et al. Selenium and
- 29 iodine supplementation of rural Tibetan children affected by Kashin-Beck osteoarthropathy. *Am J Clin*
- 30 *Nutr* 2003;78:137-44.
- 31
- 32 33. Chen Y, Huo JM, Wang ZL, Tan XW, Xue L, Geng D. A comparative research on the treatment
- 33 effect of Se supplement , Vit C supplement and cereals dryness on Kaschin -Beck disease (in Chi-
- 34 nese). *Chin J Endemiol* 2003;18:343-6.
- 35
- 36 34. Cai LW, Zhang YL. An observation by X-ray on effect of selenium in the treatment of 40
- 37 Kaschin-Beck children (in Chinese). *J Comm Med* 2005;3:60-1.
- 38
- 39 35. Yao Y, Pei F, Kang P. Selenium, iodine, and the relation with Kashin-Beck disease. *Nutrition*
- 40 2011;27:1095-100.
- 41
- 42 36. Wang Q, Li XX, Li L, Tian JH, Yang KH, Wu TX, et al. Correlation between selenium and
- 43 Kaschin-Beck disease: A meta-analysis (in Chinese). *Chin J Evid Based Med* 2013;13:1421-30.
- 44
- 45 37. Yu FF, Han J, Wang X, Fang H, Liu H, Guo X. Salt-Rich Selenium for Prevention and Control
- 46 Children with Kashin-Beck Disease: a Meta-analysis of Community-Based Trial. *Biol Trace Elem*
- 47 *Res* 2016;170:25-32.
- 48
- 49 38. Guo X, Ding D, Wang Z, Lv S, Zhang J, Tan X, et al. A study on the reparative action of x-ray
- 50 lesions in metaphyses and distal end of bone in children's fingers with kashin-beck disease treated by
- 51 se-fortified wheat (in Chinese). *Chin J Ctrl Endem Dis* 1990:269-72.
- 52
- 53
- 54
- 55
- 56
- 57
- 58
- 59
- 60

- 1  
2  
3  
4 39. Chen D, Ren S, Lu W, Li J, Fan L, Jia Z, et al. Effect of applying selenium fertilizer to improve  
5 soil and increase selenium level in food for prevention and treatment of Kaschin-Beck disease (in  
6 Chinese). *J Env Sci* 1993;5:299-309.  
7  
8 40. Xu GY, Lu XY, Cao XG. Analysis on monitoring data of Kaschin-Beck disease in Shannxi Prov-  
9 ince during 19 years (in Chinese). *Chin J Contr End Dis* 2009:442-6.  
10  
11 41. Ning Y, Wang X, Wang S, Zhang F, Zhang L, Lei Y, et al. Is it the appropriate time to stop apply-  
12 ing selenium enriched salt in kashin-beck disease areas in China? *Nutrients* 2015;7:6195-212.  
13  
14 42. Moreno-Reyes R, Suetens C, Mathieu F, Begaux F, Zhu D, Rivera MT, et al. Kashin-Beck osteo-  
15 arthropathy in rural Tibet in relation to selenium and iodine status. *N Engl J Med* 1998;339:1112-20.  
16  
17 43. Sasaki S, Iwata H, Ishiguro N, Habuchi O, Miura T. Low-selenium diet, bone, and articular carti-  
18 lage in rats. *Nutrition* 1994;10:538-43.  
19  
20 44. Goss AN, Sampson WJ, Townsend GC, McIntosh GH. Effect of iodine deficiency on craniofacial  
21 growth in young common marmosets (*Callithrix jacchus*). *J Craniofac Genet Dev Biol* 1988;8:225-33.  
22  
23  
24  
25  
26  
27  
28  
29  
30  
31  
32  
33  
34  
35  
36  
37  
38  
39  
40  
41  
42  
43  
44  
45  
46  
47  
48  
49  
50  
51  
52  
53  
54  
55  
56  
57  
58  
59  
60

## Figure Legends

Fig 1 Flow diagram of included study

Fig 2 Network of eligible comparisons for treatment efficacy network meta-analysis for KBD.

The width of lines is proportional to the number of studies compared in every pair of treatments, and the size of nodes is proportional to the total sample size of each treatment.

OR = Odds ratio, CI = Confidence intervals, Se = Sodium selenite, Se salt = selenium salt, VC = vitamin C, Se + VC = the combination of sodium selenite with vitamin C ; Se + VE = the combination of sodium selenite with vitamin E, Se yeast = selenium enriched yeast.

Fig 3 Network estimates of mean ORs, their 95% confidence intervals and 95% predictive intervals (red extensions).

OR = Odds ratio, CI = Confidence intervals, PrI = predictive intervals, Se = Sodium selenite, Se salt = selenium salt, VC = vitamin C, Se + VC = the combination of sodium selenite with vitamin C ; Se + VE = the combination of sodium selenite with vitamin E, Se yeast = selenium enriched yeast.

Fig 4 Consistency test in the network Meta-analysis

IF= inconsistency factor, OR = Odds ratio, CI = Confidence intervals, Se = Sodium selenite, Se salt = selenium salt, VC = vitamin C, Se + VC = the combination of sodium selenite with vitamin C ; Se + VE = the combination of sodium selenite with vitamin E, Se yeast = selenium enriched yeast.

The x-axis is Log OR, and the vertical line is 0. IF is the absolute inconsistency factor, meaning the logarithm of the rate ratio for OR (RoR) of direct and indirect evidence for each comparison loop. The absolute inconsistency factor values and confidence intervals are truncated at zero indicate no significant difference of inconsistency.

Fig 5 SUCRA for the cumulative probabilities

SUCRA=surface under cumulative ranking

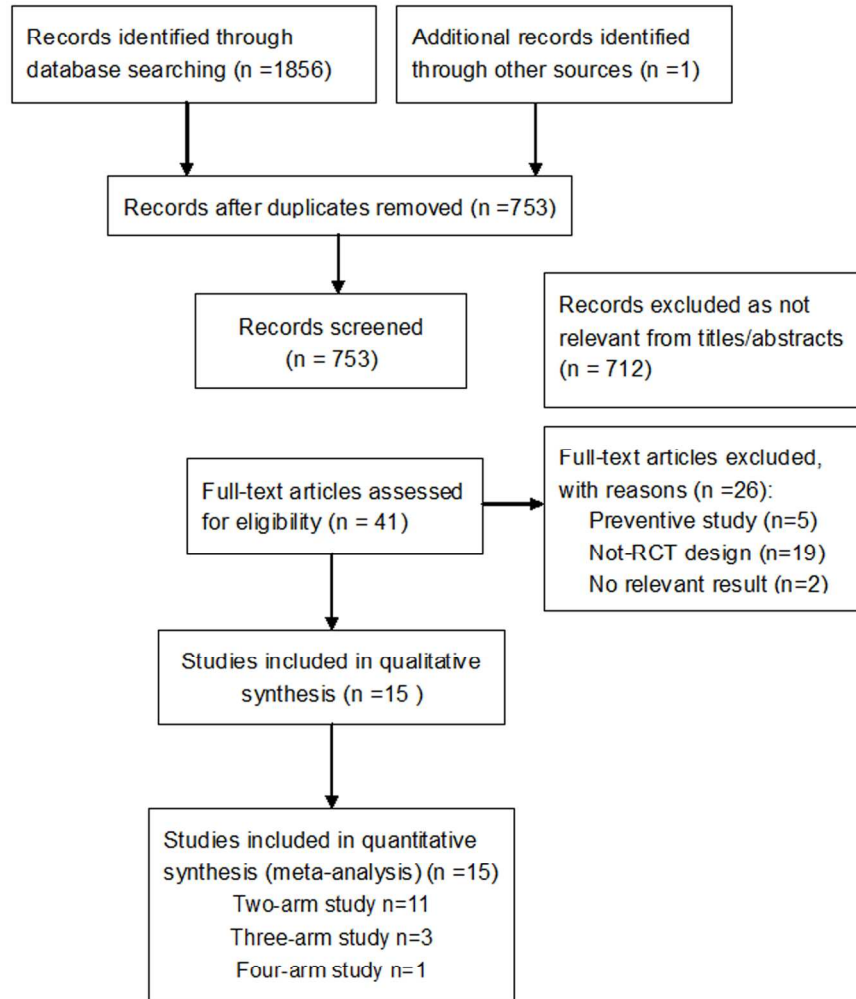

Fig 1 Flow diagram of included study

154x175mm (300 x 300 DPI)

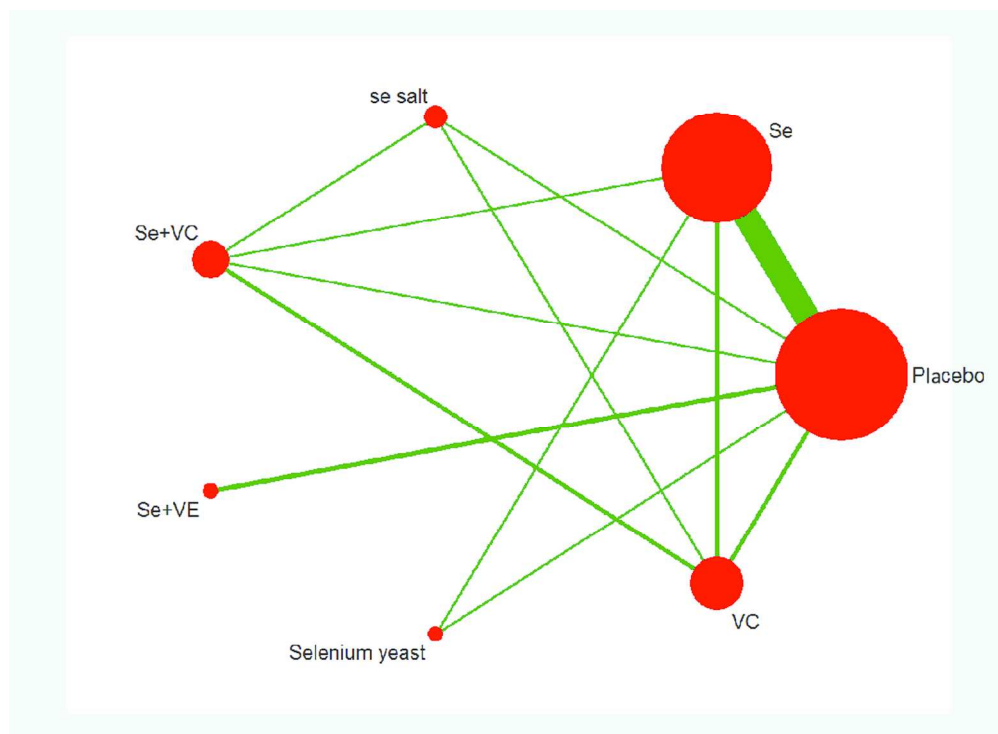

Fig 2 Network of eligible comparisons for treatment efficacy network meta-analysis for KBD. The width of lines is proportional to the number of studies compared in every pair of treatments, and the size of nodes is proportional to the total sample size of each treatment. OR = Odds ratio, CI = Confidence intervals, Se = Sodium selenite, Se salt = selenium salt, VC = vitamin C, Se + VC = the combination of sodium selenite with vitamin C ; Se + VE = the combination of sodium selenite with vitamin E, Se yeast = selenium enriched yeast.

381x277mm (300 x 300 DPI)

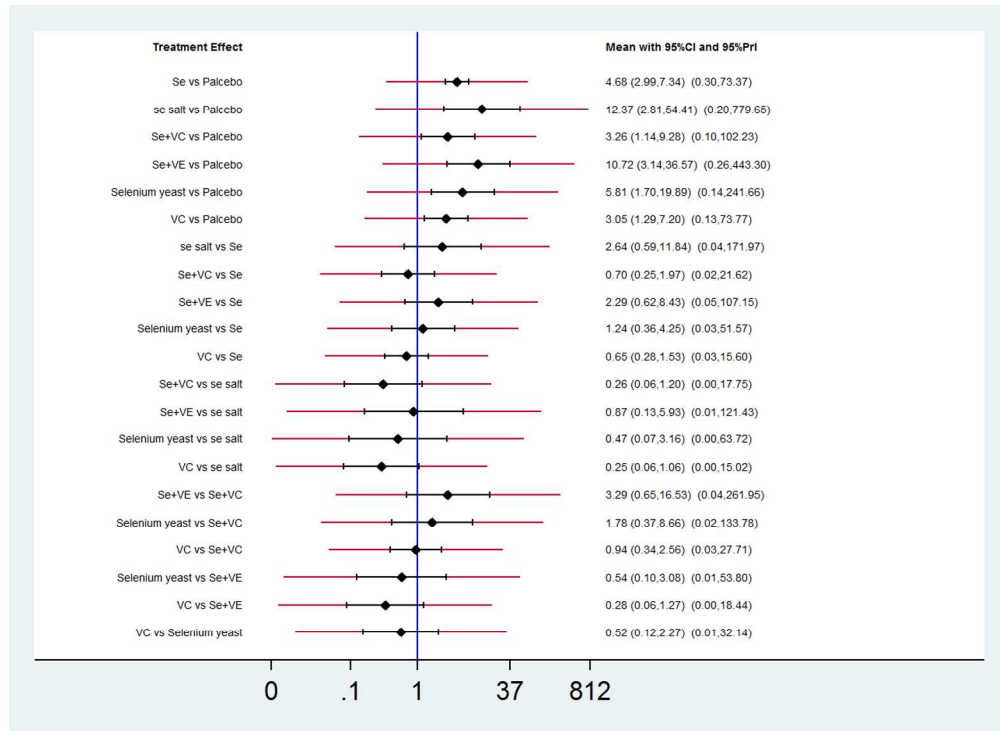

Fig 3 Network estimates of mean ORs, their 95% confidence intervals and 95% predictive intervals (red extensions).

OR = Odds ratio, CI = Confidence intervals, PrI = predictive intervals, Se = Sodium selenite, Se salt = selenium salt, VC = vitamin C, Se + VC = the combination of sodium selenite with vitamin C ; Se + VE = the combination of sodium selenite with vitamin E, Se yeast = selenium enriched yeast.

454x330mm (300 x 300 DPI)

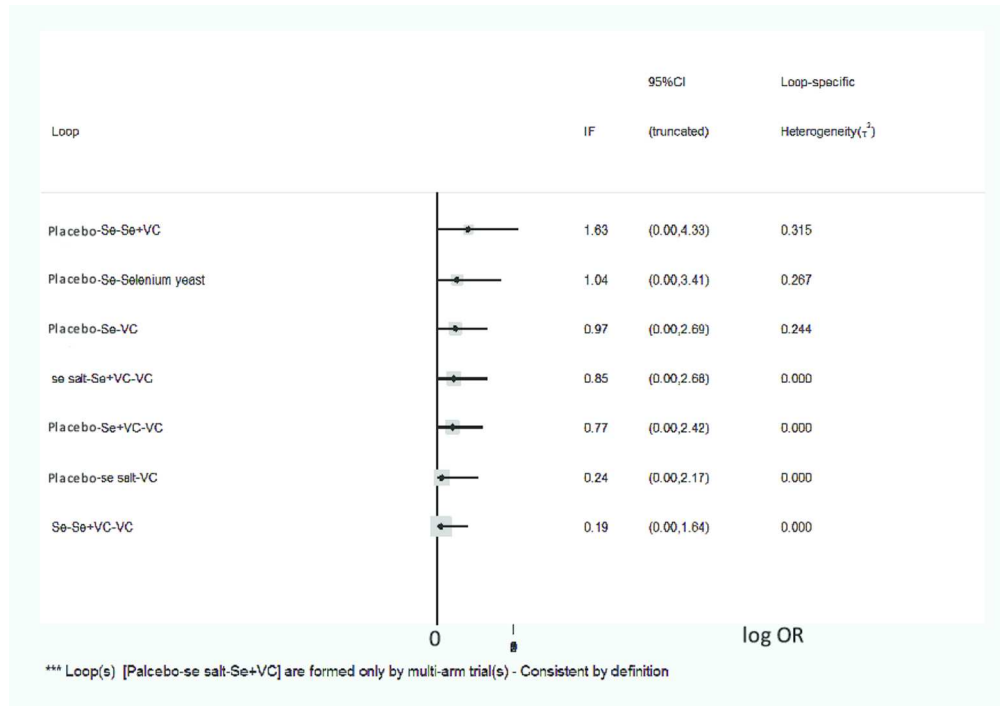

Fig 4 Consistency test in the network Meta-analysis

IF= inconsistency factor, OR = Odds ratio, CI = Confidence intervals, Se = Sodium selenite, Se salt = selenium salt, VC = vitamin C, Se + VC = the combination of sodium selenite with vitamin C ; Se + VE = the combination of sodium selenite with vitamin E, Se yeast = selenium enriched yeast.

The x-axis is Log OR, and the vertical line is 0. IF is the absolute inconsistency factor, meaning the logarithm of the rate ratio for OR (RoR) of direct and indirect evidence for each comparison loop. The absolute inconsistency factor values and confidence intervals are truncated at zero indicate no significant difference of inconsistency.

308x217mm (300 x 300 DPI)

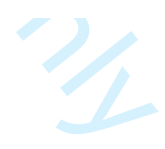

1  
2  
3  
4  
5  
6  
7  
8  
9  
10  
11  
12  
13  
14  
15  
16  
17  
18  
19  
20  
21  
22  
23  
24  
25  
26  
27  
28  
29  
30  
31  
32  
33  
34  
35  
36  
37  
38  
39  
40  
41  
42  
43  
44  
45  
46  
47  
48  
49  
50  
51  
52  
53  
54  
55  
56  
57  
58  
59  
60

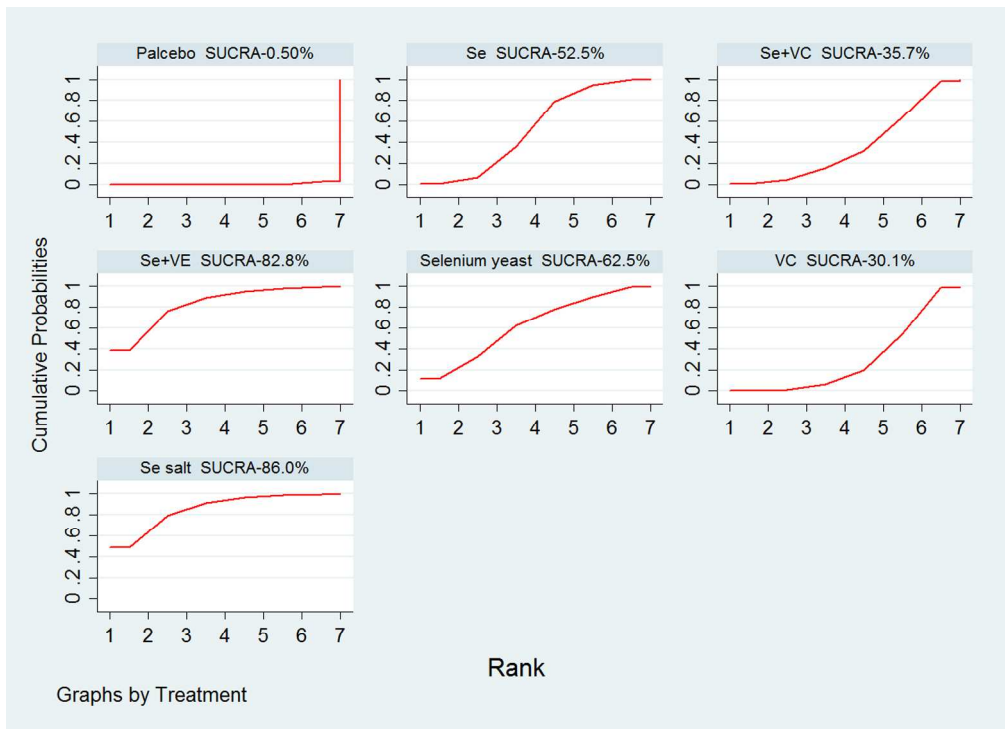

Fig 5 SUCRA for the cumulative probabilities  
SUCRA=surface under cumulative ranking

450x328mm (300 x 300 DPI)

For peer review only



**Appendix box 1 Ovid search strategy**

#1 exp kashin-beck disease/  
#2 kashin-beck disease.tw.  
#3 kashin-bek disease.tw.  
#4 big bone disease.tw.  
#5 endemic osteoarthritis.tw.  
#6 Urov disease.tw.  
#7 1 or 2 or 3 or 4 or 5 or 6  
#8 sodium selenite.tw.  
#9 selenium .tw.  
#10 Se salt.tw.  
#11 enriched yeast  
#12 8 or 9 or 10 or 11  
#13 7 AND 12  
#14 randomized controlled trial.pt.  
#15 controlled clinical trial.pt.  
#16 randmoized.ab.  
#17 placebo.ab.  
#18 randomly.ab.  
#19 trial.ab.  
#20 groups.ab.  
#21 14 or 15 or 16 or 17 or 18 or 19 or 20  
#22 13 and 21  
#23 limit #22 to human

**Appendix table 1 Characteristics of excluded studies(ordered by study ID)**

| <b>Study</b> | <b>Reason for exclusion</b> |
|--------------|-----------------------------|
| Ding 1985    | No relevant result          |
| Fan 1986     | Not a RCT                   |
| Guo 1990     | Not a RCT                   |
| Han 2013     | Not a RCT                   |
| He 1988      | Not a RCT                   |
| Huang 1959   | Not a RCT                   |
| Li 1986      | Not a RCT                   |
| Li 2004      | Preventive study            |
| Liang 1986   | Preventive study            |
| Ma 1996      | Not a RCT                   |
| Sun 2008     | Not a RCT                   |
| Suolang 2008 | Not a RCT                   |
| Wang 1983    | Preventive study            |
| Wang 1988    | Not a RCT                   |
| Wang 1989    | Preventive study            |
| Wu 1991      | Preventive study            |
| Yang 2009    | Not a RCT                   |
| Yang 2010    | Not a RCT                   |
| Yi 2006      | Not a RCT                   |
| Yu 2016      | Not a RCT                   |
| Zhang 1989   | Not a RCT                   |
| Zhang 1996   | No relevant result          |
| Zhang 2006   | Not a RCT                   |
| Zhang 2009   | Not a RCT                   |
| Zhong 1986   | Not a RCT                   |
| Zhou 1998    | Not a RCT                   |

Appendix table 2 Characteristics of included trials

| Study                   | Case No. |       | Age  |      | Intervention                                                                                                              | Control                                  | Follow-up (months) | Outcome                                                                                                              |
|-------------------------|----------|-------|------|------|---------------------------------------------------------------------------------------------------------------------------|------------------------------------------|--------------------|----------------------------------------------------------------------------------------------------------------------|
|                         | I        | C     | I    | C    |                                                                                                                           |                                          |                    |                                                                                                                      |
| Niu 1981 <sup>20</sup>  | 27       | 29    | 6~13 | 6~13 | Se + VE: Se tablet 2mg/week +VE 15mg/day                                                                                  | Placebo/week                             | 12                 | Improvement of metaphyseal lesions on X-ray                                                                          |
| YSSG 1982 <sup>21</sup> | 166      | 159   | 3~13 | 3~13 | Se tablet, 1 mg/week (3-10 yrs), 2 mg/week (11-13 yrs)                                                                    | Placebo/week                             | 12                 | Improvement of metaphyseal lesions on X-ray                                                                          |
| Wang 1983 <sup>22</sup> | 47       | 42    | 5~15 | 5~15 | Se + VC: Se tablet 2mg/week +VE 15mg/day                                                                                  | No treatment                             | 11                 | Improvement of metaphyseal lesions on X-ray                                                                          |
| Cui 1984 <sup>23*</sup> | 30       | 30/30 | 7~19 | 7~19 | Se tablet, 1 mg/week (7-10 yrs), 2 mg/week (11-19 yrs)                                                                    | ①VC 200 mg 3 times/day;<br>②Placebo/week | 6~12               | Improvement of metaphyseal lesions on X-ray                                                                          |
| Niu 1984 <sup>24</sup>  | 56       | 59    | 6~13 | 6~13 | Se tablet first week: 1.0 mg/day (< 10 yrs), 2.0 mg/day (> 11 yrs); after: 1.0 mg/week (< 10 yrs), 2.0 mg/week (> 11 yrs) | Placebo/week                             | 24                 | Improvement of metaphyseal lesions on X-ray<br>Repairing rate at the distal end of phalanges in hands on X-ray films |
| Guo 1985 <sup>25</sup>  | 50       | 50    | 5~15 | 5~15 | Se tablet, 1 mg/week (<5 yrs), 2 mg/week (>5 yrs)                                                                         | Placebo/week                             | 12                 | Improvement of metaphyseal lesions on X-ray                                                                          |

| Study                   | Case No. |     | Age  |      | Intervention                                                                                                | Control      | Follow-up (months) | Outcome                                                                                                              |  |
|-------------------------|----------|-----|------|------|-------------------------------------------------------------------------------------------------------------|--------------|--------------------|----------------------------------------------------------------------------------------------------------------------|--|
|                         | I        | C   | I    | C    |                                                                                                             |              |                    |                                                                                                                      |  |
| Guo 1986 <sup>26*</sup> | 60/60    | 60  | 5~14 | 5~14 | ①Se tablet, 0.5mg/week (<7 yrs), 1 mg/week (>8 yrs);<br>②Se yeast, 0.5mg/week (<7 yrs), 1 mg/week (>8 yrs); | Placebo/week | 13                 | Improvement of metaphyseal lesions on X-ray                                                                          |  |
| Niu 1986 <sup>27</sup>  | 285      | 277 | 6~13 | 6~13 | Se tablet, 1 mg/week (<10 yrs), 2 mg/week (>10 yrs)                                                         | Placebo/week | 12~24              | Improvement of metaphyseal lesions on X-ray<br>Repairing rate at the distal end of phalanges in hands on X-ray films |  |
| Wu 1986 <sup>28</sup>   | 171      | 177 | 5~16 | 5~16 | Se tablet, 1 mg/week (< 10 yrs), 2 mg/week (> 10 yrs)                                                       | Placebo/week | 12                 | Improvement of metaphyseal lesions on X-ray                                                                          |  |
| Deng 1988 <sup>29</sup> | 43       | 46  | 2~13 | 2~13 | Se tablet, no details                                                                                       | No treatment | 36                 | Improvement of metaphyseal lesions on X-ray<br>Repairing rate at the distal end of phalanges in hands on X-ray films |  |

1  
2  
3  
4  
5  
6  
7  
8  
9  
10  
11  
12  
13  
14  
15  
16  
17  
18  
19  
20  
21  
22  
23  
24  
25  
26  
27  
28  
29  
30  
31  
32  
33  
34  
35  
36  
37  
38  
39  
40  
41  
42  
43  
44  
45  
46

| Study                           | Case No. |       | Age     |        | Intervention                                                                                                                                                               | Control                          | Follow-up (months) | Outcome                                                                                                  |             |
|---------------------------------|----------|-------|---------|--------|----------------------------------------------------------------------------------------------------------------------------------------------------------------------------|----------------------------------|--------------------|----------------------------------------------------------------------------------------------------------|-------------|
|                                 | I        | C     | I       | C      |                                                                                                                                                                            |                                  |                    |                                                                                                          |             |
| Niu 1990 <sup>30</sup>          | 210      | 228   | 6~13    | 6~13   | Se tablet, first week: 0.5 mg/day (< 5 yrs), 1.0 mg/day (6-10 yrs), 2.0 mg/day (> 11 yrs); after: 1.0 mg/month (< 5 yrs), 2.0 mg/month (6-10 yrs), 4.0 mg/month (> 11 yrs) | Placebo/month                    | 12                 | Improvement of lesions on X-ray                                                                          | metaphyseal |
| Zhou 1991 <sup>31#</sup>        | 25/30    | 35/29 | 4~12    | 4~12   | ①Se + VC: Se tablet 1mg/10day+ VC 100mg/day;<br>②Se salt (sodium selenite: salt = 1:60,000) /10day                                                                         | ③VC, 300mg/day;<br>④No treatment | 12                 | Improvement of lesions on X-ray                                                                          | metaphyseal |
| Moreno-Reyes 2003 <sup>32</sup> | 113      | 95    | 10±0.28 | 10±0.3 | Se tablet, 1 mg/week                                                                                                                                                       | Placebo/week                     | 12                 | Improvement of lesions on X-ray<br>Repairing rate at the distal end of phalanges in hands on X-ray films | metaphyseal |
| Chen 2003 <sup>33*</sup>        | 50/50    | 50    | 6~11    | 6~11   | ①Se tablet 1mg/week;<br>② Se + VC: Se tablet 1mg/week+ VC 300 mg 2 times/day                                                                                               | VC 300mg bid                     | 12                 | Improvement of lesions on X-ray                                                                          | metaphyseal |

1  
2  
3  
4  
5  
6  
7  
8  
9  
10  
11  
12  
13  
14  
15  
16  
17  
18  
19  
20  
21  
22  
23  
24  
25  
26  
27  
28  
29  
30  
31  
32  
33  
34  
35  
36  
37  
38  
39  
40  
41  
42  
43  
44  
45  
46

| Study                  | Case No. |    | Age  |      | Intervention                                                | Control      | Follow-up (months) | Outcome                                                                                                              |
|------------------------|----------|----|------|------|-------------------------------------------------------------|--------------|--------------------|----------------------------------------------------------------------------------------------------------------------|
|                        | I        | C  | I    | C    |                                                             |              |                    |                                                                                                                      |
| Cai 2005 <sup>34</sup> | 31       | 31 | 7~13 | 7~13 | Se tablet, 2mg/10 days (7-10 yrs), 3 mg/10 days (11-13 yrs) | No treatment | 18                 | Improvement of metaphyseal lesions on X-ray<br>Repairing rate at the distal end of phalanges in hands on X-ray films |

I= intervention, C = control, YSSG = Yongshou scientific survey group of Kashin-Beck Disease, yrs = years, Se = Sodium selenite, Se salt =selenium salt, VC = vitamin C, Se + VC = the combination of sodium selenite with vitamin C ; Se + VE = the combination of sodium selenite with vitamin E, Se yeast = selenium enriched yeast. \* Three arms study, # Four arms study

**Appendix table 3 Risk of Bias of Included Studies**

| Study                   | Balanced allocation | Allocation concealment | Blinding     | Completeness of outcome | Selective outcome reporting | Other Bias            | overall assessment* |
|-------------------------|---------------------|------------------------|--------------|-------------------------|-----------------------------|-----------------------|---------------------|
| Niu 1981 <sup>20</sup>  | Unclear             | Unclear                | Double-blind | Low                     | Low                         | Low                   | Unclear             |
| YSSG 1982 <sup>21</sup> | Unclear             | Unclear                | Double-blind | Low, No dropout         | Low                         | Low                   | Unclear             |
| Wang 1983 <sup>22</sup> | unclear             | unclear                | Double-blind | High, dropouts >20%     | Low                         | High, no ITT analysis | High                |
| Cui 1984 <sup>23</sup>  | unclear             | unclear                | Double-blind | High, dropouts >20%     | Low                         | High, no ITT analysis | High                |
| Niu 1984 <sup>24</sup>  | Unclear             | Unclear                | Double-blind | Low, No dropout         | Low                         | High, no ITT analysis | High                |
| Guo 1985 <sup>25</sup>  | Unclear             | Unclear                | Not Used     | High, dropouts >20%     | Low                         | High, no ITT analysis | High                |
| Guo 1986 <sup>26</sup>  | Unclear             | Unclear                | Unclear      | High, dropouts >20%     | Low                         | High, no ITT analysis | High                |
| Niu 1986 <sup>27</sup>  | Unclear             | Unclear                | Double-blind | Low, No dropout         | Low                         | Low                   | Unclear             |

|    |                                 |         |         |              |                           |     |                       |         |
|----|---------------------------------|---------|---------|--------------|---------------------------|-----|-----------------------|---------|
| 1  |                                 |         |         |              |                           |     |                       |         |
| 2  |                                 |         |         |              |                           |     |                       |         |
| 3  | Wu 1986 <sup>28</sup>           | Unclear | Unclear | Double-blind | Unclear, No dropout < 20% | Low | High, no ITT analysis | High    |
| 4  |                                 |         |         |              |                           |     |                       |         |
| 5  |                                 |         |         |              |                           |     |                       |         |
| 6  |                                 |         |         |              |                           |     |                       |         |
| 7  |                                 |         |         |              |                           |     |                       |         |
| 8  | Deng 1988 <sup>29</sup>         | Unclear | Unclear | Unclear      | Low, drop out <10%        | Low | High, no ITT analysis | High    |
| 9  |                                 |         |         |              |                           |     |                       |         |
| 10 |                                 |         |         |              |                           |     |                       |         |
| 11 |                                 |         |         |              |                           |     |                       |         |
| 12 | Niu 1990 <sup>30</sup>          | Unclear | Unclear | Single-blind | Low, No dropout           | Low | Low                   | Unclear |
| 13 |                                 |         |         |              |                           |     |                       |         |
| 14 |                                 |         |         |              |                           |     |                       |         |
| 15 | Zhou 1991 <sup>31</sup>         | Unclear | Unclear | Unclear      | Low, No dropout           | Low | Low                   | Unclear |
| 16 |                                 |         |         |              |                           |     |                       |         |
| 17 |                                 |         |         |              |                           |     |                       |         |
| 18 | Moreno-Reyes 2003 <sup>32</sup> | Unclear | Unclear | Double-blind | Unclear, No dropout < 20% | Low | High no ITT analysis  | High    |
| 19 |                                 |         |         |              |                           |     |                       |         |
| 20 | Chen 2003 <sup>33</sup>         | Unclear | Unclear | Unclear      | High, dropouts >20%       | Low | High, no ITT analysis | High    |
| 21 |                                 |         |         |              |                           |     |                       |         |
| 22 |                                 |         |         |              |                           |     |                       |         |
| 23 |                                 |         |         |              |                           |     |                       |         |
| 24 |                                 |         |         |              |                           |     |                       |         |
| 25 |                                 |         |         |              |                           |     |                       |         |
| 26 | Cai 2005 <sup>34</sup>          | Unclear | Unclear | Not Used     | Low, No dropout           | Low | Low                   | Unclear |
| 27 |                                 |         |         |              |                           |     |                       |         |
| 28 |                                 |         |         |              |                           |     |                       |         |

29 \*: Overall Score: Low risk of bias = no bias detected in any domain; Unclear risk of bias = one category or more is potentially at risk of bias; High risk of bias = one  
 30 category or more is at high risk of bias.

31 ITT = intention to treat  
 32  
 33  
 34  
 35  
 36  
 37  
 38  
 39  
 40  
 41  
 42  
 43  
 44  
 45  
 46



**Appendix table 4 Repair rate of metaphyseal lesions of different comparisons in included studies**

| comparison                  | No. of study | No. of patients | Repair rate         |                     |
|-----------------------------|--------------|-----------------|---------------------|---------------------|
|                             |              |                 | Treatment 1 (n1/N1) | Treatment 2 (n2/N2) |
| <b>Se vs. placebo</b>       | 11           | 2427            | 887/1215            | 511/1212            |
| <b>Se vs. Se+VC</b>         | 1            | 100             | 30/50               | 33/50               |
| <b>Se vs. Se yeast</b>      | 1            | 120             | 33/60               | 42/60               |
| <b>Se vs. VC</b>            | 2            | 160             | 44/80               | 41/80               |
| <b>Se salt vs. placebo</b>  | 1            | 59              | 24/30               | 10/29               |
| <b>Se salt vs. Se+VC</b>    | 1            | 55              | 24/30               | 10/25               |
| <b>Se salt vs. VC</b>       | 1            | 65              | 24/30               | 17/35               |
| <b>Se+VC vs. placebo</b>    | 2            | 154             | 43/75               | 32/79               |
| <b>Se+VC vs. VC</b>         | 2            | 160             | 43/75               | 44/85               |
| <b>Se+VE vs. placebo</b>    | 2            | 145             | 68/74               | 32/71               |
| <b>Se yeast vs. placebo</b> | 1            | 120             | 42/60               | 23/60               |
| <b>VC vs. placebo</b>       | 2            | 124             | 33/65               | 20/59               |

## PROSPERO International prospective register of systematic reviews

### Review title and timescale

#### 1 Review title

Give the working title of the review. This must be in English. Ideally it should state succinctly the interventions or exposures being reviewed and the associated health or social problem being addressed in the review.

Effects of five types of selenium supplementation for treatment of Kashin-Beck disease in children: a systematic review and network meta-analysis

#### 2 Original language title

For reviews in languages other than English, this field should be used to enter the title in the language of the review. This will be displayed together with the English language title.

#### 3 Anticipated or actual start date

Give the date when the systematic review commenced, or is expected to commence.

07/03/2016

#### 4 Anticipated completion date

Give the date by which the review is expected to be completed.

31/12/2016

#### 5 Stage of review at time of this submission

Indicate the stage of progress of the review by ticking the relevant boxes. Reviews that have progressed beyond the point of completing data extraction at the time of initial registration are not eligible for inclusion in PROSPERO. This field should be updated when any amendments are made to a published record.

The review has not yet started

| Review stage                                                    | Started | Completed |
|-----------------------------------------------------------------|---------|-----------|
| Preliminary searches                                            | Yes     | Yes       |
| Piloting of the study selection process                         | Yes     | Yes       |
| Formal screening of search results against eligibility criteria | Yes     | Yes       |
| Data extraction                                                 | Yes     | No        |
| Risk of bias (quality) assessment                               | Yes     | No        |
| Data analysis                                                   | Yes     | No        |

Provide any other relevant information about the stage of the review here.

### Review team details

#### 6 Named contact

The named contact acts as the guarantor for the accuracy of the information presented in the register record.

Yulin Liao

#### 7 Named contact email

Enter the electronic mail address of the named contact.

yulinliao\_2015@163.com

#### 8 Named contact address

Enter the full postal address for the named contact.

West China Hospital, Sichuan University, Chengdu , China

#### 9 Named contact phone number

Enter the telephone number for the named contact, including international dialing code.

15198147968

#### 10 Organisational affiliation of the review

Full title of the organisational affiliations for this review, and website address if available. This field may be completed as 'None' if the review is not affiliated to any organisation.

None.

Website address:

11 Review team members and their organisational affiliations

Give the title, first name and last name of all members of the team working directly on the review. Give the organisational affiliations of each member of the review team.

| Title     | First name | Last name | Affiliation                                                                                           |
|-----------|------------|-----------|-------------------------------------------------------------------------------------------------------|
| Miss      | Yulin      | Liao      | West China Hospital, Sichuan University, Chengdu , China                                              |
| Mrs       | Dongmei    | Xie       | West China Hospital, Sichuan University, Chengdu , China                                              |
| Professor | Jirong     | Yue       | West China Hospital, Sichuan University, Chengdu , China                                              |
| Professor | Chao       | Zhang     | Center for Evidence-Based Medicine and Clinical Research, Taihe Hospital Hubei University of Medicine |
| Mrs       | Yanyan     | Wang      | West China Hospital, Sichuan University, Chengdu , China                                              |
| Miss      | Chuanyao   | Deng      | West China Hospital, Sichuan University, Chengdu , China                                              |
| Miss      | Ling       | Chen      | West China Hospital, Sichuan University, Chengdu , China                                              |

12 Funding sources/sponsors

Give details of the individuals, organizations, groups or other legal entities who take responsibility for initiating, managing, sponsoring and/or financing the review. Any unique identification numbers assigned to the review by the individuals or bodies listed should be included.

None

13 Conflicts of interest

List any conditions that could lead to actual or perceived undue influence on judgements concerning the main topic investigated in the review.

Are there any actual or potential conflicts of interest?

None known

14 Collaborators

Give the name, affiliation and role of any individuals or organisations who are working on the review but who are not listed as review team members.

| Title | First name | Last name | Organisation details |
|-------|------------|-----------|----------------------|
|-------|------------|-----------|----------------------|

## Review methods

15 Review question(s)

State the question(s) to be addressed / review objectives. Please complete a separate box for each question.

Comparing the effectiveness of five kinds of selenium supplementation for the treatment of patients with Kashin-Beck disease (KBD), and ranking these selenium supplementation based on their performance.

16 Searches

Give details of the sources to be searched, and any restrictions (e.g. language or publication period). The full search strategy is not required, but may be supplied as a link or attachment.

We will search, without language restrictions, for all publications between January 1966 and 31 Oct 2016 using electronic databases, which included MEDLINE, EMBASE, The Cochrane Central Register of Controlled Trials (CENTRAL), The Cochrane Database of Systematic Reviews, The Chinese Biomedical Database, Chinese National Knowledge Infrastructure, Chinese Science and Technique Journals Database, and Wan Fang database.

17 URL to search strategy

If you have one, give the link to your search strategy here. Alternatively you can e-mail this to PROSPERO and we will store and link to it.

I give permission for this file to be made publicly available

Yes

18 Condition or domain being studied

Give a short description of the disease, condition or healthcare domain being studied. This could include health and wellbeing outcomes.

Kashin-Beck disease.

19 Participants/population

Give summary criteria for the participants or populations being studied by the review. The preferred format includes details of both inclusion and exclusion criteria.

Children.

20 Intervention(s), exposure(s)

Give full and clear descriptions of the nature of the interventions or the exposures to be reviewed

Selenium tablet and other types of selenium supplements including Selenium salt, selenium enriched yeast, Selenium+ VE, or Selenium + VC .

21 Comparator(s)/control

Where relevant, give details of the alternatives against which the main subject/topic of the review will be compared (e.g. another intervention or a non-exposed control group).

Placebo or no treatment or other other types of selenium supplements.

22 Types of study to be included

Give details of the study designs to be included in the review. If there are no restrictions on the types of study design eligible for inclusion, this should be stated.

Randomized, controlled trials (RCTs).

23 Context

Give summary details of the setting and other relevant characteristics which help define the inclusion or exclusion criteria.

24 Primary outcome(s)

Give the most important outcomes.

The repairing rate of metaphyseal lesions on X-ray film.

Give information on timing and effect measures, as appropriate.

25 Secondary outcomes

List any additional outcomes that will be addressed. If there are no secondary outcomes enter None.

None.

Give information on timing and effect measures, as appropriate.

26 Data extraction (selection and coding)

Give the procedure for selecting studies for the review and extracting data, including the number of researchers involved and how discrepancies will be resolved. List the data to be extracted.

27 Risk of bias (quality) assessment

State whether and how risk of bias will be assessed, how the quality of individual studies will be assessed, and whether and how this will influence the planned synthesis.

Two reviewers will independently evaluate the methodological quality of individual study according the Cochrane risk-of-bias tool. Any disagreements will be resolved by consulting a third author.

28 Strategy for data synthesis

Give the planned general approach to be used, for example whether the data to be used will be aggregate or at the level of individual participants, and whether a quantitative or narrative (descriptive) synthesis is planned. Where

appropriate a brief outline of analytic approach should be given.

Initially, we will perform standard pairwise meta-analyses for all available direct comparisons in STATA. Statistical heterogeneity of treatment effects across studies will be assessed by the Cochrane Q test, and the extent of between-study heterogeneity will be quantified by I-squared. Then we will conduct network meta-analysis in STATA to determine comparative effectiveness of each therapy. We will present estimates of treatment effects as odds ratios and 95% central credible intervals (CrI).

## 29 Analysis of subgroups or subsets

Give any planned exploration of subgroups or subsets within the review. 'None planned' is a valid response if no subgroup analyses are planned.

'None planned.'

## Review general information

### 30 Type and method of review

Select the type of review and the review method from the drop down list.

Systematic review

### 31 Language

Select the language(s) in which the review is being written and will be made available, from the drop down list. Use the control key to select more than one language.

English

Will a summary/abstract be made available in English?

Yes

### 32 Country

Select the country in which the review is being carried out from the drop down list. For multi-national collaborations select all the countries involved. Use the control key to select more than one country.

China

### 33 Other registration details

Give the name of any organisation where the systematic review title or protocol is registered together with any unique identification number assigned. If extracted data will be stored and made available through a repository such as the Systematic Review Data Repository (SRDR), details and a link should be included here.

### 34 Reference and/or URL for published protocol

Give the citation for the published protocol, if there is one.

Give the link to the published protocol, if there is one. This may be to an external site or to a protocol deposited with CRD in pdf format.

I give permission for this file to be made publicly available

Yes

### 35 Dissemination plans

Give brief details of plans for communicating essential messages from the review to the appropriate audiences.

Do you intend to publish the review on completion?

Yes

### 36 Keywords

Give words or phrases that best describe the review. (One word per box, create a new box for each term)

### 37 Details of any existing review of the same topic by the same authors

Give details of earlier versions of the systematic review if an update of an existing review is being registered, including full bibliographic reference if possible.

### 38 Current review status

Review status should be updated when the review is completed and when it is published.

Ongoing

1  
2  
3  
4  
5  
6  
7  
8  
9  
10  
11  
12  
13  
14  
15  
16  
17  
18  
19  
20  
21  
22  
23  
24  
25  
26  
27  
28  
29  
30  
31  
32  
33  
34  
35  
36  
37  
38  
39  
40  
41  
42  
43  
44  
45  
46  
47  
48  
49  
50  
51  
52  
53  
54  
55  
56  
57  
58  
59  
60

- 39 Any additional information  
Provide any further information the review team consider relevant to the registration of the review.
  
- 40 Details of final report/publication(s)  
This field should be left empty until details of the completed review are available.  
Give the full citation for the final report or publication of the systematic review.  
Give the URL where available.

For peer review only

**PRISMA NMA Checklist of Items to Include When Reporting A Systematic Review Involving a Network Meta-analysis**

| Section/Topic             | Item # | Checklist Item                                                                                                                                                                                                                                                                                                                                                                                                                                                                                                                                                                                                                                                                                                                                                                          | Reported on Page #                               |
|---------------------------|--------|-----------------------------------------------------------------------------------------------------------------------------------------------------------------------------------------------------------------------------------------------------------------------------------------------------------------------------------------------------------------------------------------------------------------------------------------------------------------------------------------------------------------------------------------------------------------------------------------------------------------------------------------------------------------------------------------------------------------------------------------------------------------------------------------|--------------------------------------------------|
| <b>TITLE</b>              |        |                                                                                                                                                                                                                                                                                                                                                                                                                                                                                                                                                                                                                                                                                                                                                                                         |                                                  |
| Title                     | 1      | Identify the report as a systematic review <i>incorporating a network meta-analysis (or related form of meta-analysis)</i> .                                                                                                                                                                                                                                                                                                                                                                                                                                                                                                                                                                                                                                                            | Page 1                                           |
| <b>ABSTRACT</b>           |        |                                                                                                                                                                                                                                                                                                                                                                                                                                                                                                                                                                                                                                                                                                                                                                                         |                                                  |
| Structured summary        | 2      | Provide a structured summary including, as applicable:<br><b>Background:</b> main objectives<br><b>Methods:</b> data sources; study eligibility criteria, participants, and interventions; study appraisal; and <i>synthesis methods, such as network meta-analysis</i> .<br><b>Results:</b> number of studies and participants identified; summary estimates with corresponding confidence/credible intervals; <i>treatment rankings may also be discussed. Authors may choose to summarize pairwise comparisons against a chosen treatment included in their analyses for brevity.</i><br><b>Discussion/Conclusions:</b> limitations; conclusions and implications of findings.<br><b>Other:</b> primary source of funding; systematic review registration number with registry name. | Page 3                                           |
| <b>INTRODUCTION</b>       |        |                                                                                                                                                                                                                                                                                                                                                                                                                                                                                                                                                                                                                                                                                                                                                                                         |                                                  |
| Rationale                 | 3      | Describe the rationale for the review in the context of what is already known, <i>including mention of why a network meta-analysis has been conducted</i> .                                                                                                                                                                                                                                                                                                                                                                                                                                                                                                                                                                                                                             | Page 5                                           |
| Objectives                | 4      | Provide an explicit statement of questions being addressed, with reference to participants, interventions, comparisons, outcomes, and study design (PICOS).                                                                                                                                                                                                                                                                                                                                                                                                                                                                                                                                                                                                                             | Page 6                                           |
| <b>METHODS</b>            |        |                                                                                                                                                                                                                                                                                                                                                                                                                                                                                                                                                                                                                                                                                                                                                                                         |                                                  |
| Protocol and registration | 5      | Indicate whether a review protocol exists and if and where it can be accessed (e.g., Web address); and, if available, provide registration information, including registration number.                                                                                                                                                                                                                                                                                                                                                                                                                                                                                                                                                                                                  | Page 6<br>Registration number:<br>CRD42016051874 |
| Eligibility criteria      | 6      | Specify study characteristics (e.g., PICOS, length of follow-up) and report characteristics (e.g., years considered, language, publication status) used as criteria for eligibility, giving rationale. <i>Clearly describe eligible treatments included in the treatment network, and note whether any have been clustered or merged into the same node (with justification)</i> .                                                                                                                                                                                                                                                                                                                                                                                                      | Page 6-7                                         |
| Information sources       | 7      | Describe all information sources (e.g., databases with dates of coverage, contact with study authors to identify additional studies) in the search and date last searched.                                                                                                                                                                                                                                                                                                                                                                                                                                                                                                                                                                                                              | Page 6                                           |

|    |                                        |           |                                                                                                                                                                                                                                                                                                                                                                                                                                                   |                |
|----|----------------------------------------|-----------|---------------------------------------------------------------------------------------------------------------------------------------------------------------------------------------------------------------------------------------------------------------------------------------------------------------------------------------------------------------------------------------------------------------------------------------------------|----------------|
| 1  | Search                                 | 8         | Present full electronic search strategy for at least one database, including any limits used, such that it could be repeated.                                                                                                                                                                                                                                                                                                                     | Page 6         |
| 2  |                                        |           |                                                                                                                                                                                                                                                                                                                                                                                                                                                   |                |
| 3  |                                        |           |                                                                                                                                                                                                                                                                                                                                                                                                                                                   |                |
| 4  | Study selection                        | 9         | State the process for selecting studies (i.e., screening, eligibility, included in systematic review, and, if applicable, included in the meta-analysis).                                                                                                                                                                                                                                                                                         | Page 7         |
| 5  |                                        |           |                                                                                                                                                                                                                                                                                                                                                                                                                                                   |                |
| 6  |                                        |           |                                                                                                                                                                                                                                                                                                                                                                                                                                                   |                |
| 7  | Data collection process                | 10        | Describe method of data extraction from reports (e.g., piloted forms, independently, in duplicate) and any processes for obtaining and confirming data from investigators.                                                                                                                                                                                                                                                                        | Page 7         |
| 8  |                                        |           |                                                                                                                                                                                                                                                                                                                                                                                                                                                   |                |
| 9  |                                        |           |                                                                                                                                                                                                                                                                                                                                                                                                                                                   |                |
| 10 |                                        |           |                                                                                                                                                                                                                                                                                                                                                                                                                                                   |                |
| 11 | Data items                             | 11        | List and define all variables for which data were sought (e.g., PICOS, funding sources) and any assumptions and simplifications made.                                                                                                                                                                                                                                                                                                             | Page 6-8       |
| 12 |                                        |           |                                                                                                                                                                                                                                                                                                                                                                                                                                                   |                |
| 13 |                                        |           |                                                                                                                                                                                                                                                                                                                                                                                                                                                   |                |
| 14 | <b>Geometry of the network</b>         | <b>S1</b> | Describe methods used to explore the geometry of the treatment network under study and potential biases related to it. This should include how the evidence base has been graphically summarized for presentation, and what characteristics were compiled and used to describe the evidence base to readers.                                                                                                                                      | Page 9 & Fig 2 |
| 15 |                                        |           |                                                                                                                                                                                                                                                                                                                                                                                                                                                   |                |
| 16 |                                        |           |                                                                                                                                                                                                                                                                                                                                                                                                                                                   |                |
| 17 |                                        |           |                                                                                                                                                                                                                                                                                                                                                                                                                                                   |                |
| 18 |                                        |           |                                                                                                                                                                                                                                                                                                                                                                                                                                                   |                |
| 19 |                                        |           |                                                                                                                                                                                                                                                                                                                                                                                                                                                   |                |
| 20 |                                        |           |                                                                                                                                                                                                                                                                                                                                                                                                                                                   |                |
| 21 | Risk of bias within individual studies | 12        | Describe methods used for assessing risk of bias of individual studies (including specification of whether this was done at the study or outcome level), and how this information is to be used in any data synthesis.                                                                                                                                                                                                                            | Page 10        |
| 22 |                                        |           |                                                                                                                                                                                                                                                                                                                                                                                                                                                   |                |
| 23 |                                        |           |                                                                                                                                                                                                                                                                                                                                                                                                                                                   |                |
| 24 |                                        |           |                                                                                                                                                                                                                                                                                                                                                                                                                                                   |                |
| 25 | Summary measures                       | 13        | State the principal summary measures (e.g., risk ratio, difference in means). <i>Also describe the use of additional summary measures assessed, such as treatment rankings and surface under the cumulative ranking curve (SUCRA) values, as well as modified approaches used to present summary findings from meta-analyses.</i>                                                                                                                 | Page 8-9       |
| 26 |                                        |           |                                                                                                                                                                                                                                                                                                                                                                                                                                                   |                |
| 27 |                                        |           |                                                                                                                                                                                                                                                                                                                                                                                                                                                   |                |
| 28 |                                        |           |                                                                                                                                                                                                                                                                                                                                                                                                                                                   |                |
| 29 |                                        |           |                                                                                                                                                                                                                                                                                                                                                                                                                                                   |                |
| 30 |                                        |           |                                                                                                                                                                                                                                                                                                                                                                                                                                                   |                |
| 31 | Planned methods of analysis            | 14        | Describe the methods of handling data and combining results of studies for each network meta-analysis. This should include, but not be limited to: <ul style="list-style-type: none"> <li>• <i>Handling of multi-arm trials;</i></li> <li>• <i>Selection of variance structure;</i></li> <li>• <i>Selection of prior distributions in Bayesian analyses; and</i></li> <li>• <i>Assessment of model fit.</i></li> </ul>                            | Page 8-9       |
| 32 |                                        |           |                                                                                                                                                                                                                                                                                                                                                                                                                                                   |                |
| 33 |                                        |           |                                                                                                                                                                                                                                                                                                                                                                                                                                                   |                |
| 34 |                                        |           |                                                                                                                                                                                                                                                                                                                                                                                                                                                   |                |
| 35 |                                        |           |                                                                                                                                                                                                                                                                                                                                                                                                                                                   |                |
| 36 |                                        |           |                                                                                                                                                                                                                                                                                                                                                                                                                                                   |                |
| 37 |                                        |           |                                                                                                                                                                                                                                                                                                                                                                                                                                                   |                |
| 38 |                                        |           |                                                                                                                                                                                                                                                                                                                                                                                                                                                   |                |
| 39 |                                        |           |                                                                                                                                                                                                                                                                                                                                                                                                                                                   |                |
| 40 | <b>Assessment of Inconsistency</b>     | <b>S2</b> | Describe the statistical methods used to evaluate the agreement of direct and indirect evidence in the treatment network(s) studied. Describe efforts taken to address its presence when found.                                                                                                                                                                                                                                                   | Page 8-9       |
| 41 |                                        |           |                                                                                                                                                                                                                                                                                                                                                                                                                                                   |                |
| 42 |                                        |           |                                                                                                                                                                                                                                                                                                                                                                                                                                                   |                |
| 43 |                                        |           |                                                                                                                                                                                                                                                                                                                                                                                                                                                   |                |
| 44 | Risk of bias across studies            | 15        | Specify any assessment of risk of bias that may affect the cumulative evidence (e.g., publication bias, selective reporting within studies).                                                                                                                                                                                                                                                                                                      | Page 10        |
| 45 |                                        |           |                                                                                                                                                                                                                                                                                                                                                                                                                                                   |                |
| 46 |                                        |           |                                                                                                                                                                                                                                                                                                                                                                                                                                                   |                |
| 47 | Additional analyses                    | 16        | Describe methods of additional analyses if done, indicating which were pre-specified. This may include, but not be limited to, the following: <ul style="list-style-type: none"> <li>• Sensitivity or subgroup analyses;</li> <li>• Meta-regression analyses;</li> <li>• <i>Alternative formulations of the treatment network; and</i></li> <li>• <i>Use of alternative prior distributions for Bayesian analyses (if applicable).</i></li> </ul> | Page 7-9       |
| 48 |                                        |           |                                                                                                                                                                                                                                                                                                                                                                                                                                                   |                |
| 49 |                                        |           |                                                                                                                                                                                                                                                                                                                                                                                                                                                   |                |
| 50 |                                        |           |                                                                                                                                                                                                                                                                                                                                                                                                                                                   |                |
| 51 |                                        |           |                                                                                                                                                                                                                                                                                                                                                                                                                                                   |                |
| 52 |                                        |           |                                                                                                                                                                                                                                                                                                                                                                                                                                                   |                |
| 53 |                                        |           |                                                                                                                                                                                                                                                                                                                                                                                                                                                   |                |
| 54 |                                        |           |                                                                                                                                                                                                                                                                                                                                                                                                                                                   |                |
| 55 |                                        |           |                                                                                                                                                                                                                                                                                                                                                                                                                                                   |                |
| 56 |                                        |           |                                                                                                                                                                                                                                                                                                                                                                                                                                                   |                |
| 57 |                                        |           |                                                                                                                                                                                                                                                                                                                                                                                                                                                   |                |
| 58 |                                        |           |                                                                                                                                                                                                                                                                                                                                                                                                                                                   |                |
| 59 |                                        |           |                                                                                                                                                                                                                                                                                                                                                                                                                                                   |                |
| 60 |                                        |           |                                                                                                                                                                                                                                                                                                                                                                                                                                                   |                |



## RESULTS†

|                                          |           |                                                                                                                                                                                                                                                                                                                                                                                                                                                              |                                      |
|------------------------------------------|-----------|--------------------------------------------------------------------------------------------------------------------------------------------------------------------------------------------------------------------------------------------------------------------------------------------------------------------------------------------------------------------------------------------------------------------------------------------------------------|--------------------------------------|
| Study selection                          | 17        | Give numbers of studies screened, assessed for eligibility, and included in the review, with reasons for exclusions at each stage, ideally with a flow diagram.                                                                                                                                                                                                                                                                                              | Page 9 & Fig 1                       |
| <b>Presentation of network structure</b> | <b>S3</b> | Provide a network graph of the included studies to enable visualization of the geometry of the treatment network.                                                                                                                                                                                                                                                                                                                                            | Fig 2                                |
| <b>Summary of network geometry</b>       | <b>S4</b> | Provide a brief overview of characteristics of the treatment network. This may include commentary on the abundance of trials and randomized patients for the different interventions and pairwise comparisons in the network, gaps of evidence in the treatment network, and potential biases reflected by the network structure.                                                                                                                            | Page 9                               |
| Study characteristics                    | 18        | For each study, present characteristics for which data were extracted (e.g., study size, PICOS, follow-up period) and provide the citations.                                                                                                                                                                                                                                                                                                                 | Page 10 & Appendix table 2           |
| Risk of bias within studies              | 19        | Present data on risk of bias of each study and, if available, any outcome level assessment.                                                                                                                                                                                                                                                                                                                                                                  | Page 10 & Appendix table 3           |
| Results of individual studies            | 20        | For all outcomes considered (benefits or harms), present, for each study: 1) simple summary data for each intervention group, and 2) effect estimates and confidence intervals. <i>Modified approaches may be needed to deal with information from larger networks.</i>                                                                                                                                                                                      | Page 10-11 & Appendix table 2        |
| Synthesis of results                     | 21        | Present results of each meta-analysis done, including confidence/credible intervals. <i>In larger networks, authors may focus on comparisons versus a particular comparator (e.g. placebo or standard care), with full findings presented in an appendix. League tables and forest plots may be considered to summarize pairwise comparisons.</i> If additional summary measures were explored (such as treatment rankings), these should also be presented. | Page 10-11 & Table 2                 |
| <b>Exploration for inconsistency</b>     | <b>S5</b> | Describe results from investigations of inconsistency. This may include such information as measures of model fit to compare consistency and inconsistency models, <i>P</i> values from statistical tests, or summary of inconsistency estimates from different parts of the treatment network.                                                                                                                                                              | Page 11 & Fig 4                      |
| Risk of bias across studies              | 22        | Present results of any assessment of risk of bias across studies for the evidence base being studied.                                                                                                                                                                                                                                                                                                                                                        | Page 11 & Fig 4                      |
| Results of additional analyses           | 23        | Give results of additional analyses, if done (e.g., sensitivity or subgroup analyses, meta-regression analyses, <i>alternative network geometries studied, alternative choice of prior distributions for Bayesian analyses, and so forth</i> ).                                                                                                                                                                                                              | Page 11<br>Table 4<br>Fig 4<br>Fig 5 |

|    |                     |    |                                                                                                                                                                                                                                                                                                                                                                                                                                |                   |
|----|---------------------|----|--------------------------------------------------------------------------------------------------------------------------------------------------------------------------------------------------------------------------------------------------------------------------------------------------------------------------------------------------------------------------------------------------------------------------------|-------------------|
| 1  | <b>DISCUSSION</b>   |    |                                                                                                                                                                                                                                                                                                                                                                                                                                |                   |
| 2  | Summary of evidence | 24 | Summarize the main findings, including the strength of evidence for each main outcome; consider their relevance to key groups (e.g., healthcare providers, users, and policy-makers).                                                                                                                                                                                                                                          | <b>Page 11-12</b> |
| 3  |                     |    |                                                                                                                                                                                                                                                                                                                                                                                                                                |                   |
| 4  |                     |    |                                                                                                                                                                                                                                                                                                                                                                                                                                |                   |
| 5  |                     |    |                                                                                                                                                                                                                                                                                                                                                                                                                                |                   |
| 6  | Limitations         | 25 | Discuss limitations at study and outcome level (e.g., risk of bias), and at review level (e.g., incomplete retrieval of identified research, reporting bias). <i>Comment on the validity of the assumptions, such as transitivity and consistency. Comment on any concerns regarding network geometry (e.g., avoidance of certain comparisons).</i>                                                                            | <b>Page 14</b>    |
| 7  |                     |    |                                                                                                                                                                                                                                                                                                                                                                                                                                |                   |
| 8  |                     |    |                                                                                                                                                                                                                                                                                                                                                                                                                                |                   |
| 9  |                     |    |                                                                                                                                                                                                                                                                                                                                                                                                                                |                   |
| 10 |                     |    |                                                                                                                                                                                                                                                                                                                                                                                                                                |                   |
| 11 |                     |    |                                                                                                                                                                                                                                                                                                                                                                                                                                |                   |
| 12 |                     |    |                                                                                                                                                                                                                                                                                                                                                                                                                                |                   |
| 13 |                     |    |                                                                                                                                                                                                                                                                                                                                                                                                                                |                   |
| 14 | Conclusions         | 26 | Provide a general interpretation of the results in the context of other evidence, and implications for future research.                                                                                                                                                                                                                                                                                                        | <b>Page 15-16</b> |
| 15 |                     |    |                                                                                                                                                                                                                                                                                                                                                                                                                                |                   |
| 16 |                     |    |                                                                                                                                                                                                                                                                                                                                                                                                                                |                   |
| 17 |                     |    |                                                                                                                                                                                                                                                                                                                                                                                                                                |                   |
| 18 | <b>FUNDING</b>      |    |                                                                                                                                                                                                                                                                                                                                                                                                                                |                   |
| 19 | Funding             | 27 | Describe sources of funding for the systematic review and other support (e.g., supply of data); role of funders for the systematic review. This should also include information regarding whether funding has been received from manufacturers of treatments in the network and/or whether some of the authors are content experts with professional conflicts of interest that could affect use of treatments in the network. | <b>Page 16</b>    |
| 20 |                     |    |                                                                                                                                                                                                                                                                                                                                                                                                                                |                   |
| 21 |                     |    |                                                                                                                                                                                                                                                                                                                                                                                                                                |                   |
| 22 |                     |    |                                                                                                                                                                                                                                                                                                                                                                                                                                |                   |
| 23 |                     |    |                                                                                                                                                                                                                                                                                                                                                                                                                                |                   |
| 24 |                     |    |                                                                                                                                                                                                                                                                                                                                                                                                                                |                   |
| 25 |                     |    |                                                                                                                                                                                                                                                                                                                                                                                                                                |                   |
| 26 |                     |    |                                                                                                                                                                                                                                                                                                                                                                                                                                |                   |
| 27 |                     |    |                                                                                                                                                                                                                                                                                                                                                                                                                                |                   |

PICOS = population, intervention, comparators, outcomes, study design.

\* Text in italics indicates wording specific to reporting of network meta-analyses that has been added to guidance from the PRISMA statement.

† Authors may wish to plan for use of appendices to present all relevant information in full detail for items in this section.

# BMJ Open

## Effects of Five Types of Selenium Supplementation for Treatment of Kashin-Beck disease in children: A Systematic Review and Network Meta-analysis

|                                 |                                                                                                                                                                                                                                                                                                                                                                                                                                                                                                                                                                                                                                     |
|---------------------------------|-------------------------------------------------------------------------------------------------------------------------------------------------------------------------------------------------------------------------------------------------------------------------------------------------------------------------------------------------------------------------------------------------------------------------------------------------------------------------------------------------------------------------------------------------------------------------------------------------------------------------------------|
| Journal:                        | <i>BMJ Open</i>                                                                                                                                                                                                                                                                                                                                                                                                                                                                                                                                                                                                                     |
| Manuscript ID                   | bmjopen-2017-017883.R2                                                                                                                                                                                                                                                                                                                                                                                                                                                                                                                                                                                                              |
| Article Type:                   | Research                                                                                                                                                                                                                                                                                                                                                                                                                                                                                                                                                                                                                            |
| Date Submitted by the Author:   | 23-Nov-2017                                                                                                                                                                                                                                                                                                                                                                                                                                                                                                                                                                                                                         |
| Complete List of Authors:       | Xie, Dongmei; West China Hospital, Sichuan University, Department of Geriatrics<br>Liao, Yulin; West China Hospital, Sichuan University, Department of Geriatrics<br>Yue, Jirong; West China Hospital, Sichuan University, Department of Geriatrics<br>Zhang, Chao; Taihe Hospital, Hubei University of Medicine, Center for Evidence-based Medicine and Clinical Research<br>Wang, Yanyan; West China Hospital, Sichuan University, Department of Geriatrics<br>Deng, Chuanyao; West China Hospital, Sichuan University, Department of Geriatrics<br>Chen, Ling; West China Hospital, Sichuan University, Department of Geriatrics |
| <b>Primary Subject Heading</b>: | Evidence based practice                                                                                                                                                                                                                                                                                                                                                                                                                                                                                                                                                                                                             |
| Secondary Subject Heading:      | Complementary medicine, Evidence based practice, Medical management, Nutrition and metabolism                                                                                                                                                                                                                                                                                                                                                                                                                                                                                                                                       |
| Keywords:                       | Kashin-Beck disease, Selenium supplementation, Network meta-analysis, Randomized controlled trial                                                                                                                                                                                                                                                                                                                                                                                                                                                                                                                                   |
|                                 |                                                                                                                                                                                                                                                                                                                                                                                                                                                                                                                                                                                                                                     |

SCHOLARONE™  
Manuscripts

1  
2  
3  
4 **Effects of Five Types of Selenium Supplementation for Treatment**  
5 **of Kashin-Beck disease in children: A Systematic Review and**  
6 **Network Meta-analysis**  
7  
8  
9

10 **Running title: Selenium Supplementation for Treatment of KBD**

11 Dongmei Xie, Yulin Liao, Jirong Yue, Chao Zhang, Yanyan Wang, Chuanyao Deng, Ling  
12 Chen  
13  
14  
15

16  
17 **Dongmei Xie BS<sup>a</sup>**

18 Department of Geriatrics, West China Hospital, Sichuan University  
19 No. 37, Guo Xue Xiang, Chengdu, Sichuan, CHINA  
20  
21  
22

23  
24 **Yulin Liao MD<sup>a</sup>**

25 Department of Geriatrics, West China Hospital, Sichuan University  
26 No. 37, Guo Xue Xiang, Chengdu, Sichuan, CHINA  
27  
28  
29

30 **Jirong Yue, MD (corresponding author)<sup>b</sup>**

31 Department of Geriatrics, West China Hospital, Sichuan University  
32 No. 37, Guo Xue Xiang, Chengdu, Sichuan, CHINA  
33  
34  
35  
36  
37 Email: [yuejirong11@hotmail.com](mailto:yuejirong11@hotmail.com)  
38  
39

40  
41 **Chao Zhang, MD<sup>b</sup>**

42 Center for Evidence-Based Medicine and Clinical Research, Taihe Hospital  
43 Hubei University of Medicine, Shiyan 442000, Hubei Province, China  
44  
45  
46  
47 Email: [zhangchao0803@126.com](mailto:zhangchao0803@126.com).  
48  
49

50  
51 **Yanyan Wang PHD**

52 Department of Geriatrics, West China Hospital, Sichuan University  
53 No. 37, Guo Xue Xiang, Chengdu, Sichuan, CHINA  
54  
55  
56  
57  
58  
59

1  
2  
3  
4  
5  
6 **Chuanyao Deng BS**

7 Department of Geriatrics, West China Hospital, Sichuan University  
8  
9 No. 37, Guo Xue Xiang, Chengdu, Sichuan, CHINA  
10

11  
12  
13 **Ling Chen BS**

14 Department of Geriatrics, West China Hospital, Sichuan University  
15  
16 No. 37, Guo Xue Xiang, Chengdu, Sichuan, CHINA  
17

18  
19 <sup>a</sup> Dongmei Xie and Yulin Liao contributed equally to this article.  
20

21 <sup>b</sup> Jirong Yue and Chao Zhang contributed equally to this article  
22  
23  
24  
25  
26  
27  
28  
29  
30  
31  
32  
33  
34  
35  
36  
37  
38  
39  
40  
41  
42  
43  
44  
45  
46  
47  
48  
49  
50  
51  
52  
53  
54  
55  
56  
57  
58  
59  
60

## Abstract

**Objective:** To compare the effectiveness of five kinds of selenium supplementation for the treatment of patients with Kashin-Beck disease (KBD), and rank these selenium supplementation based on their performance.

**Design:** We searched for all publications between January 1, 1966 and March 31, 2017 using seven electronic databases. GRADE system to NMAs was applied to rate the quality of the evidence. We conducted a random effects model network meta-analysis in STATA to determine comparative effectiveness of each intervention. Rankings were obtained by using the surface under the cumulative ranking curve (SUCRA) values and mean ranks.

**Results:** A total of 15 randomized controlled trials involving 2931 patients were included. After assessment of the overall quality of the evidence, we downgraded our primary outcomes from high to low or very low quality. Network meta-analyses showed that all five kinds of selenium supplementation had higher metaphysis X-ray improvement which were superior to placebo. Ranking on efficacy indicated that selenium salt was ranked the highest, followed by sodium selenite + vitamin E, selenium enriched yeast, sodium selenite and then sodium selenite + vitamin C.

**Conclusions:** Based on the results of network meta-analysis, all five types of selenium supplements are more effective than placebo and so that selenium supplementation is of help in repairing metaphyseal lesions. Since the overall quality of the evidence was low or very low, the SUCRA values may be misleading and should be considered jointly with the GRADE confidence in the estimates for each comparison. The quality of the evidence is insufficient to draw a conclusion about what method of selenium supplementation is most effective.

**Trial registration number:** CRD42016051874

**Keywords:** Kashin-Beck disease; Selenium supplementation; Network meta-analysis; Randomized controlled trial

**Strengths of this study:**

- The present NMA integrated evidence from direct and indirect comparisons.
- We comprehensively summarized all RCTs of selenium supplements for KBD.
- We applied GRADE system to NMAs based GRADE working group to rate the quality of the evidence.

**Potential limitations:**

- Despite our exhaustive search, only 15 RCTs conducted in China were included in this review. Some trials may have been published in local journals that were missed in our search.
- The overall quality of the evidence was low or very low.
- The SUCRA values may be misleading and should be considered jointly with the GRADE confidence in the estimates for each comparison.

## Introduction

Kashin-Beck disease (KBD) is a chronic, disabling degenerative disease of the peripheral joints and spine<sup>1,2</sup>. It is present primarily among people in southeast Siberia, north Korea, and China<sup>3</sup>. KBD is prevalent in 377 counties of 14 provinces in China, with 0.64 million cases<sup>4</sup>. KBD occurs in childhood and involves pathologic changes of metaphysis and epiphyseal plate, resulting in multiple symptoms in the growth and the articular cartilages such as bony deformity, joints enlargement, growth retardation and functional impairment in multiple joints. The resulting disability causes an important human and social economic burden to both affected children and adults. Moreover, KBD can also cause disturbances in the cartilage metabolism, the lipid peroxidation, and sulfur and selenium metabolism<sup>5,6</sup>. So far, some measures exist for treatment of KBD because of the incomplete ability of the cartilage to repair itself. Treatment strategies for symptomatic relief include non-steroidal anti-inflammatory drugs<sup>7</sup>, sodium hyaluronate<sup>8</sup>, physical therapy<sup>9</sup> and chondroitin sulfate combined with glucosamine<sup>10</sup>. Successful surgical treatments to correct joint defects have been reported by orthopaedists<sup>11,12</sup>.

Although the etiology of KBD is multifactorial, one of the major environmental risk factors is selenium deficiency<sup>13</sup>. Since the 1970s, selenium supplements have been given in some highly endemic areas. A meta-analysis including five randomized control trials (RCTs) and 10 non-RCTs demonstrated the benefits of selenium supplementation for the primary prevention of KBD in children<sup>14</sup>. Another systematic review suggested that sodium selenite (Se) was effective for the treatment of patients already affected with KBD<sup>15</sup>. Besides Se tablet, there are other selenium supplements used for treating KBD, including selenium salts (Se salt), selenium enriched yeast (Se yeast), the combination of sodium selenite with vitamin E (Se + VE), and the combination of sodium selenite with vitamin C (Se + VC). At the time of



our review, there were few head-to-head comparisons of different types of selenium supplementation for treatment of KBD. In light of the need for government policy makers and clinical care workers to know the effects of a set of alternative options, we conducted a systematic review and network meta-analysis (NMA). The aim of this systematic review and NMA was to compare the effectiveness of all types of selenium supplementation for the treatment of patients with KBD, and rank these selenium supplementation based on their performance.

## Method

A protocol for this systematic review was devised in accordance with the PRISMA guidelines and registered on PROSPERO, and the trial registration number was CRD42016051874.

### *Search strategy*

We searched, without language restrictions, for all publications between January 1, 1966 and March 31, 2017 using electronic databases, which included MEDLINE, EMBASE, The Cochrane Central Register of Controlled Trials, The Cochrane Database of Systematic Reviews, The Chinese Biomedical Database, Chinese National Knowledge Infrastructure, Chinese Science and Technique Journals Database, and Wan Fang database. The following MeSH words and free words were used: “Kashin-Beck disease,” “Kashin-Beck disease,” “big bone disease,” “endemic osteoarthritis,” “Urov disease” and “selenium,” “Sodium selenite,” and “Se”. The Ovid search strategy is available in Appendix box 1. Reference lists from published narrative review articles and systematic reviews were reviewed to identify additional studies.

### *Eligibility criteria*

We included all randomized, controlled trials (RCTs) that used Se tablet and other types of selenium supplements including Se salt, Se yeast, Se + VE, as well as Se + VC for KBD

1  
2  
3  
4 patients. The control groups included placebo or no treatment controls, or other active medi-  
5  
6 cines. The diagnostic criteria used for KBD was based on the Diagnosis Criteria for Kashin-  
7  
8 Beck Disease (GB16003-1995), which was developed by National Health and Family Plan-  
9  
10 ning Commission of the People's Republic of China<sup>16</sup>. We excluded the following studies: (1)  
11  
12 studies with small sample sizes (numbers of patients less than 20 in each treatment group);  
13  
14 (2) preventive studies; (3) studies without available information of interest. Studies reporting  
15  
16 mixed groups of participants (e.g., participants with and without KBD) were included only if  
17  
18 the therapeutic effect data could be identified and extracted separately. Outcome of interest to  
19  
20 this review was the repair rate of metaphyseal lesions on X-ray film. Typically, repair was  
21  
22 defined as being cured basically or improved significantly of metaphyseal lesions according  
23  
24 to the latest judgment standard of X-ray for treatment effect of KBD<sup>17</sup>.

### 25 26 27 28 ***Data extraction and quality evaluation***

29  
30 Two authors (Y. L & D. X) independently screened all citations identified by the searches.  
31  
32 Full-text articles of potential studies were obtained and assessed according to the aforemen-  
33  
34 tioned inclusion criteria. The data extraction form included publication (first author, year of  
35  
36 publication), demographics (sample size and age), interventions (dosage, route of administra-  
37  
38 tion, and duration of treatment), the follow-up period, as well as outcomes. We extracted data  
39  
40 to the nearest 12 months to estimate the overall odds ratio (OR) because all the included  
41  
42 RCTs report this time point. Two reviewers independently evaluated the methodological qual-  
43  
44 ity of individual study according the Cochrane risk-of-bias tool<sup>18</sup>. In our review, we applied  
45  
46 the GRADE system to our NMA based on the GRADE working group<sup>19</sup>. The methods of rat-  
47  
48 ing the quality of direct comparison are the same for GRADE in traditional meta-analysis.  
49  
50 We downgraded the evidence from “high quality” by one level for serious (or by two for very  
51  
52 serious) study limitations (risk of bias), indirectness of evidence, inconsistency, imprecision  
53  
54  
55  
56  
57  
58  
59  
60

1  
2  
3  
4 of effect estimates or potential publication bias. The rating of the quality of the indirect esti-  
5 mates is based on the ratings of the two pair-wise estimates that contributes to the indirect  
6 estimate of the comparison of interest. The lower confidence rating of the two direct compar-  
7 isons constitutes the confidence rating of the indirect comparison. When both direct and indi-  
8 rect evidence are available, we used the higher of the two quality ratings as the quality rating  
9 for the NMA estimate. In addition, we needed to consider the intransitivity among different  
10 groups and the inconsistency between direct comparison and indirect comparison. Further-  
11 more, we used the GRADE profiler to help us create "Summary of findings" tables, and re-  
12 ported outcomes in this tables. Any disagreements would be resolved by consulting a third  
13 author (J.Y).

### 24 ***Statistical analysis***

25  
26  
27  
28 As the repair rate of metaphyseal lesions on X-ray film, the outcome of interest in this  
29 text, was a discontinuous statistics, we calculated the OR and its 95% confidence intervals  
30 (CI) as the effect estimates. Initially, we performed standard pair-wise meta-analyses for all  
31 available direct comparisons using a random effects model in STATA. Statistical heterogenei-  
32 ty of treatment effects across studies was assessed by the Cochrane Q test, and the extent of  
33 between-study heterogeneity was quantified by  $I^2$ , of which with a value greater than 50%  
34 indicates substantial heterogeneity. Then we conducted a random effects model network me-  
35 ta-analysis in STATA to determine comparative effectiveness of each intervention by using  
36 the network command and self-programmed STATA routines available at  
37 <http://www.mtm.uoi.gr>. We present the mean effect sizes for the network estimates (OR)  
38 along with their 95% confidence intervals (CI) and prediction intervals (PrI). The PrI shows  
39 the predicted parameter around estimated treatment effects in the future study.

40  
41  
42  
43 To evaluate consistency in the entire network, we used the 'design-by-treatment' model,  
44  
45  
46  
47  
48  
49  
50  
51  
52  
53

1  
2  
3  
4 which was described by Higgins and colleagues, by using the network meta command in  
5  
6 STATA. This method accounts for different source of inconsistency that can occur when stud-  
7  
8 ies with different designs (two-arm trials vs. three-arm trials) give different results as well as  
9  
10 disagreement between direct and indirect evidence. We inferred about the presence of incon-  
11  
12 sistency from any source in the entire network based on a chi-squared test, and a P value  
13  
14 greater than 0.05 indicated that the direct and indirect comparisons in the network were con-  
15  
16 sistent.  
17

18  
19 We also estimated the ranking probabilities for all treatments of being at each possible  
20  
21 rank. Rankings were obtained by using the surface under the cumulative ranking curve (SU-  
22  
23 CRA) values and mean ranks. SUCRA could be expressed as a percentage interpreted as the  
24  
25 percentage of effectiveness of a treatment that would be ranked first without uncertainty. To  
26  
27 derive these SUCRA values we used the ranking probabilities estimated from the mvmeta  
28  
29 command.  
30

## 31 32 **Results**

### 33 34 *Study inclusion and characteristics*

35  
36 Initial searches yielded 1686 citations. Of these, 1645 duplicate or irrelevant records were  
37  
38 excluded and full-text articles of the remaining 41 studies were retrieved for further assess-  
39  
40 ment according to the inclusion criteria. A total of 15 studies<sup>20-34</sup> containing 2931 patient were  
41  
42 included eventually in our meta-analysis (Fig 1). We excluded 26 trials for the reasons docu-  
43  
44 mented in the Characteristics of excluded studies table (Appendix Table 1).  
45  
46

47  
48 A total of seven interventions were evaluated: Se, Se salt, Se yeast, Se + VE, Se + VC, VC,  
49  
50 and placebo. Figure 2 shows the network of all treatment comparisons included in this re-  
51  
52 view. The age of participants range from 2 to 16 years old and the duration of follow-up var-  
53  
54 ied from 6 months to 36 months. The main characteristics of the included studies were simi-  
55  
56  
57  
58  
59

lar, and the characteristics (e.g. interventions dosage, route of administration, duration of treatment, the follow-up period, and outcomes) are presented in the online supplementary Appendix Table 2.

### ***Overall assessment for evidence quality***

All included trials were reported to be RCTs. The quality of included studies was overall low. Study quality for each study can be seen in Appendix Table 3. We downgraded this outcome from high to low or very low quality for possible bias, inconsistency, or imprecision. Overall assessment for evidence quality was seen in Table 1.

**Table 1 Quality ratings for comparison of different interventions**

| Comparison           | Quality of direct evidence | Quality of indirect evidence | Quality of network meta-analysis evidence |
|----------------------|----------------------------|------------------------------|-------------------------------------------|
| Se vs. placebo       | Low*,†                     | Low*,#                       | Low*,†                                    |
| Se salt vs. placebo  | Low*,†                     | Low*,#,                      | Low*,†                                    |
| Se+VC vs. placebo    | Moderate*                  | Low*,#                       | Moderate*                                 |
| Se+VE vs. placebo    | Very low*,†,‡              | Low*,#                       | Low*,#                                    |
| Se yeast vs. placebo | Moderate*                  | Low*,#                       | Moderate*                                 |
| VC vs. placebo       | Moderate*                  | Low*,#                       | Moderate*                                 |
| Se salt vs. Se       | —                          | Very low*,‡,¶                | Very low*,‡,¶                             |
| Se+VC vs. Se         | Moderate*                  | Low*,‡                       | Moderate*                                 |
| Se+VE vs. Se         | —                          | Very low*,‡,¶                | Very low*,‡,¶                             |
| Se yeast vs. Se      | Moderate*                  | Very low*,‡,¶                | Moderate*                                 |
| VC vs. Se            | Moderate*                  | Low*,¶                       | Moderate*                                 |
| Se+VC vs. Se salt    | Low*,‡                     | Low*,¶                       | Low*,¶                                    |
| Se+VE vs. Se salt    | —                          | Very low*,‡,¶                | Very low*,‡,¶                             |
| Se yeast vs. Se salt | —                          | Very low*,‡,¶                | Very low*,‡,¶                             |
| VC vs. Se salt       | Low*,‡                     | Very low*,‡,¶                | Low*,¶                                    |
| Se+VE vs. Se+VC      | —                          | Very low*,‡,¶                | Very low*,‡,¶                             |
| Se yeast vs. Se+VC   | —                          | Very low*,‡,¶                | Very low*,‡,¶                             |
| VC vs. Se+VC         | Moderate*                  | Very low*,‡,¶                | Moderate*                                 |
| Se yeast vs. Se+VE   | —                          | Very low*,‡,¶                | Very low*,‡,¶                             |

|                 |   |                 |                 |
|-----------------|---|-----------------|-----------------|
| VC vs. Se+VE    | — | Very low*,‡,¶,¶ | Very low*,‡,¶,¶ |
| VC vs. Se yeast | — | Very low*,‡,¶,¶ | Very low*,‡,¶,¶ |

\*Limitations (risk of bias). †Inconsistency. ‡Imprecision. #Inconsistency for indirect evidence: prediction intervals for treatment effect include effects that would have different interpretations. ¶Indirectness: no convincing evidence for the plausibility of the transitivity assumption. Se = Sodium selenite, Se salt = selenium salt, VC = vitamin C, Se + VC = the combination of sodium selenite with vitamin C ; Se + VE = the combination of sodium selenite with vitamin E, Se yeast = selenium enriched yeast

### *Intervention-control pair-wise meta-analyses*

All RCTs reported repair rate of metaphyseal lesions on X-ray films. Follow-up duration of included RCTs were varied. We extracted data to the nearest 12 months to estimate the overall OR. When compared to placebo, the pooled OR (random effects model) of X-ray improvement was in favor of Se (OR 5.0, 95% CI: 3.21 - 7.78,  $P < 0.001$ ,  $I^2 = 70\%$ ), Se salt (OR 7.6, 95% CI: 2.34 - 24.67,  $P = 0.001$ ), Se enriched yeast (OR 3.75, 95% CI: 1.76 - 8.02,  $P = 0.001$ ), and Se + VE (OR 11.05, 95% CI: 2.61 - 46.80,  $P = 0.03$ ,  $I^2 = 60\%$ ) respectively, which indicated that repairing rate of metaphyseal lesions on X-ray films was significantly higher for these drugs than placebo. Summary of findings for each selenium supplements compare to placebo was seen in Table 2. A few RCTs reported direct comparisons among active interventions. There were two RCTs compared Se with VC, the pooled OR of two RCTs also showed no significant difference existed (OR 1.15, 95% CI: 0.51 - 2.63,  $P=0.93$ ,  $I^2 = 0\%$ )<sup>23, 33</sup>. There was only one RCT for Se vs. Se yeast<sup>26</sup>, Se vs. Se +VC<sup>31</sup>, Se salt vs. Se + VC<sup>31</sup>, Se salt vs. VC<sup>31</sup>, respectively. OR of X-ray improvement was significantly higher in Se salt group compared with Se + VC (OR 6.00, 95% CI: 1.81 - 19.93,  $P=0.003$ ) and VC alone (OR 4.24, 95% CI: 1.39 - 12.90,  $P=0.011$ ). There were no significant differences noted in other active interventions comparisons (See Table 3). The data of repair rate for metaphyseal lesions were listed in appendix Table 4.

Table 2 Summary of findings

| <b>Patient or population:</b> Treatment of Kashin-Beck disease in children |                                                  |                                   |                                    |                                        |                                           |
|----------------------------------------------------------------------------|--------------------------------------------------|-----------------------------------|------------------------------------|----------------------------------------|-------------------------------------------|
| <b>Outcomes:</b> Improvement of metaphyseal lesions on X-ray               |                                                  |                                   |                                    |                                        |                                           |
| <b>Intervention:</b> See list <b>Comparison:</b> placebo                   |                                                  |                                   |                                    |                                        |                                           |
| <b>Intervention/Comparison:</b>                                            | <b>Anticipated absolute effects*</b><br>(95% CI) |                                   | <b>Relative effect</b><br>(95% CI) | <b>No of participants</b><br>(studies) | <b>Quality of the evidence</b><br>(GRADE) |
|                                                                            | <b>Repair rate with placebo</b>                  | <b>Repair rate with Se</b>        |                                    |                                        |                                           |
|                                                                            | 42 per 100                                       | <b>79 per 100</b><br>(701 to 850) | <b>OR 5.00</b><br>(3.21 to 7.78)   | 2427<br>(11 RCTs)                      | ⊕⊕○○<br>LOW <sup>a,b</sup>                |
| Se salt compared to placebo                                                | 35 per 1,00                                      | <b>80 per 100</b><br>(552 to 928) | <b>OR 7.60</b><br>(2.34 to 24.67)  | 59<br>(1 RCT)                          | ⊕⊕○○<br>LOW <sup>a,c</sup>                |
| Se+VC compared to placebo                                                  | 35 per 100                                       | <b>40 per 100</b><br>(181 to 668) | <b>OR 1.27</b><br>(0.42 to 3.83)   | 54<br>(1 RCT)                          | ⊕⊕⊕○<br>MODERATE <sup>a</sup>             |
| Se+VE compared to placebo                                                  | 45 per 100                                       | <b>90 per 100</b><br>(682 to 975) | <b>OR 11.05</b><br>(2.61 to 46.80) | 145<br>(2 RCTs)                        | ⊕○○○<br>VERY LOW <sup>a,b,c</sup>         |
| Se yeast compared to placebo                                               | 38 per 100                                       | <b>70 per 100</b><br>(522 to 833) | <b>OR 3.75</b><br>(1.76 to 8.02)   | 120<br>(1 RCT)                         | ⊕⊕⊕○<br>MODERATE <sup>a</sup>             |
| VC compared to placebo                                                     | 34 per 100                                       | <b>51 per 100</b><br>(334 to 681) | <b>OR 2.02</b><br>(0.98 to 4.17)   | 124<br>(2 RCTs)                        | ⊕⊕⊕○<br>MODERATE <sup>a</sup>             |

\***The repair rate in the intervention group** (and its 95% confidence interval) is based on the assumed rate in the comparison group and the **relative effect** of the intervention (and its 95% CI).  
**CI:** Confidence interval; **OR:** Odds ratio

**GRADE Working Group grades of evidence**  
**High quality:** We are very confident that the true effect lies close to that of the estimate of the effect  
**Moderate quality:** We are moderately confident in the effect estimate: The true effect is likely to be close to the estimate of the effect, but there is a possibility that it is substantially different  
**Low quality:** Our confidence in the effect estimate is limited: The true effect may be substantially different from the estimate of the effect  
**Very low quality:** We have very little confidence in the effect estimate: The true effect is likely to be substantially different from the estimate of effect

a. Limitations (risk of bias): no studies described adequate methods regarding the sequence of randomization and reported allocation concealment. Some studies did not use of a blinding method and ITT analysis.

b. Inconsistency: small sample size or have a higher I<sup>2</sup>, or both.

c. Imprecision: the effects are large but the overall sample size are low.

**Table 3 Results of pair-wise and network meta-analyses of repairing rate of metaphyseal lesions on X-ray films**

| <b>OR<br/>(95%CI) #</b> | <b>Placebo</b>                                  | <b>Se</b>                                  | <b>Se salt</b>                             | <b>Se + VC</b>                             | <b>Se + VE</b>      | <b>Se yeast</b>    |
|-------------------------|-------------------------------------------------|--------------------------------------------|--------------------------------------------|--------------------------------------------|---------------------|--------------------|
| <b>Se</b>               | 4.68 (2.99 to 7.34)*<br>5.00 (3.21 to 7.78)     | -                                          | -                                          | -                                          | -                   | -                  |
| <b>Se salt</b>          | 12.37 (2.81 to 54.41)*<br>7.60 (2.34 to 24.67)  | 2.64 (0.59 to 11.84)                       | -                                          | -                                          | -                   | -                  |
| <b>Se + VC</b>          | 3.26 (1.14 to 9.28)*<br>1.27 (0.42 to 3.83)     | 0.70 (0.25 to 1.97)<br>1.30 (0.57 to 2.94) | 0.26 (0.06 to 1.20)<br>0.17 (0.05 to 0.55) | -                                          | -                   | -                  |
| <b>Se + VE</b>          | 10.72 (3.14 to 36.57)*<br>11.05 (2.61 to 46.80) | 2.29 (0.62 to 8.43)                        | 0.87 (0.13 to 5.93)                        | 3.29 (0.65 to 16.53)                       | -                   | -                  |
| <b>Se yeast</b>         | 5.81 (1.70 to 19.89)*<br>3.75 (1.76 to 8.02)    | 1.24 (0.36 to 4.25)<br>1.92 (0.90 to 4.00) | 0.47 (0.07 to 3.16)                        | 1.78 (0.37 to 8.66)                        | 0.54 (0.10 to 3.08) | -                  |
| <b>VC</b>               | 3.05 (1.29 to 7.20)*<br>2.02 (0.98 to 4.17)     | 0.65 (0.28 to 1.53)<br>0.95 (0.51 to 1.79) | 0.25 (0.06 to 1.06)<br>0.24 (0.08 to 0.72) | 0.94 (0.34 to 2.56)<br>0.87 (0.38 to 1.96) | 0.28 (0.06 to 1.27) | 0.52(0.12 to 2.27) |

# ORs represent odds of repair in row-treatment versus column-treatment. ORs larger than 1 denote higher repair rate in row-treatment than column-treatment. In each cell, the first line represents the result of network meta-analyses, and the second row represents the result of pair-wise meta-analyses. OR = Odds ratio, CI = Confidence intervals, Se = Sodium selenite, Se salt = selenium salt, VC = vitamin C, Se + VC = the combination of sodium selenite with vitamin C ; Se + VE = the combination of sodium selenite with vitamin E, Se yeast = selenium enriched yeast



### **Results of network meta-analyses and consistency test**

The pooled OR and 95% CI of X-ray improvement for active treatment compared with placebo was 4.68 (2.99 to 7.34) for Se, 12.37 (2.81 to 54.41) for Se salt, 5.81 (1.70 to 19.89) for Se enriched yeast, 10.72 (3.14 to 36.57) for Se + VE, and 3.26 (1.14 to 9.28) for Se + VC respectively, which indicated a significant difference in efficacy. For the comparison between active treatments, no significant differences were found. More details were presented in Table 3. In Figure 3, we presented the OR for the network estimates along with 95% CI and PrI.

There was no inconsistency between direct and indirect evidences according to the design-by-treatment interaction model ( $P=0.88$ ), implying that direct and indirect evidence were mainly consistent (Fig 4). However, the results of the comparison of Se + VC and VC versus placebo showed some degree of inconsistency. Actually, the lower CI for X-ray improvement were nearly equal to 1 (1.13 for Se + VC and 1.27 for VC), showing a trend to coincide with direct results.

Table 4 displayed the distribution of probabilities for each treatment being ranked for their efficacy in KBD according the SUCRA values (Fig 5) and mean ranks.

**Table 4 Probabilistic ranking of effectiveness of different interventions**

| Interventions | Probabilistic ranking |             |           |
|---------------|-----------------------|-------------|-----------|
|               | SUCRA (%)             | Pr Best (%) | Mean Rank |
| Se salt       | 86                    | 49.1        | 1.8       |
| Se+VE         | 82.8                  | 38.5        | 2         |
| Se yeast      | 62.5                  | 11.6        | 3.3       |
| Se            | 52.5                  | 0.2         | 3.9       |
| Se+VC         | 35.7                  | 0.4         | 4.9       |
| VC            | 30.1                  | 0.2         | 5.2       |
| Placebo       | 0.5                   | 0           | 7         |

SUCRA=surface under cumulative ranking, Se = Sodium selenite, Se salt = selenium salt, VC = vitamin C, Se + VC = the combination of sodium selenite with vitamin C ; Se + VE = the combination of sodium selenite with vitamin E, Se yeast = selenium enriched yeast.

Se salt was ranked the most effective followed by Se+VE, Se-yeast, Se and then Se + VC. VC and placebo as a control was ranked the least effective.

## Discussion

### *Principal findings*

Our network meta-analysis of all 15 available RCTs in 2931 patients with KBD showed that all five kinds of selenium supplementation (including Se, Se salt, Se enriched yeast, Se + VE, Se + VC) were superior to placebo/no treatment in repairing metaphyseal lesions. There was uncertainty around the difference between two active treatments. However, the probabilistic ranking of interventions showed that Se salt was ranked the most effective, followed by Se + VE, Se enriched yeast, Se and then Se + VC.

### *Relation to other studies*

Studies have proposed that selenium deficiency is the underlying factor that predisposes the target cells (chondrocytes) to oxidative stress from free-radical carriers<sup>35</sup>. In most highly endemic area, the level of total soil selenium concentrations is typically low. A meta-analysis of the correlation between selenium and KBD reported that selenium levels in water, soil, cereal, and corn in endemic regions were lower than regions without high rates of KBD<sup>36</sup>. Furthermore, most of the inhabitants living in areas with KBD have a low selenium nutritive status, which is reflected by low selenium contents in their blood serum, red blood cell, urine, and hair.

The effectiveness of various methods of selenium supplementation for children has been demonstrated by many studies including Se salt<sup>37</sup>, Se enriched yeast<sup>26</sup>, oral sodium selenite tablet<sup>15</sup>, spraying Se on crops<sup>38</sup>, and Se enriched fertilizer<sup>39</sup>. Selenium supplementation was associated with a simultaneous decrease in the prevalence of KBD, along with an increased selenium content in the hair of inhabitants living in areas with KBD. It was reported that the

1  
2  
3  
4 incidence of radiographic evidence of metaphysical lesions of the hands was 44.8% in 1990  
5  
6 at Cuimu town of the Shaanxi province in children aged 7~12 years. After implementation of  
7  
8 comprehensive prevention measures of KBD, especially using Se salt, the incidence these x-  
9  
10 ray findings decreased to 0.3% in 2010<sup>40</sup>. The low incidence of KBD also may explain why  
11  
12 there has not been any studies about Se treatment for KBD published in recent years.  
13  
14

15 Se salt was produced by adding 0.833 g of sodium selenite powder into every 50 kg of  
16  
17 source salt and then expanding it to 1:60,000 Se salt. Although administration of Se tablet is  
18  
19 effective for preventing and treating KBD in children<sup>14,15</sup>, it is very difficult for millions of  
20  
21 children living in endemic areas to adhere to a long-term medication. However, salt is a nec-  
22  
23 essary part of daily life and food intake. The compliance can be more effectively guaranteed.  
24  
25 A limitation to the findings about Se salt is that due to the difficulty of carrying out a RCT  
26  
27 comparing Se salt with placebo or other active drugs, only one RCT has been done<sup>31</sup>. Howev-  
28  
29 er, one meta-analysis involving 11 non-RCTs (2652 participants) also showed that supple-  
30  
31 ment Se salt was effective for preventing and treatment for KBD in Children<sup>37</sup>. Since Se salt  
32  
33 is the most economical way for low-income families, it is anticipated that continuous use of  
34  
35 Se salt and other comprehensive prevention measures may help to eliminate the KBD carti-  
36  
37 lage damages in Children<sup>41</sup>.  
38  
39  
40

41 Despite the evidence in our meta-analysis, there remains some controversy around sele-  
42  
43 nium supplementation in relationship with iodine deficiency. In a cross sectional study in Ti-  
44  
45 bet area, Moreno-Reyes and his colleges found no association between individual selenium  
46  
47 status and KBD, whereas iodine deficiency was a risk factor<sup>42</sup>. Similarly, the only RCT<sup>32</sup>  
48  
49 published in English in our review showed only 1 case of improvements in X-ray in sodium  
50  
51 selenite group. The negative findings of the above studies should, however, be interpreted  
52  
53 with caution. These studies were all conducted in Tibet where selenium and iodine are both  
54  
55  
56  
57  
58  
59  
60

1  
2  
3  
4 deficient in the diet. Selenium and iodine deficiency are both risk factors of KBD<sup>35</sup>. In animal  
5  
6 experiments, growth retardation was observed in rats fed with a low selenium diet<sup>43</sup>, and im-  
7  
8 paired bone development was observed with an iodine deficient diet<sup>44</sup>. We do not exclude the  
9  
10 possibility that selenium supplementation may not counterbalance the negative effects of  
11  
12 long-term iodine deficiency. So KBD seems unlikely to be due to only one cause. Other ge-  
13  
14 netic and environmental factors may confer either a relatively protective effect or accelerate  
15  
16 the disease.  
17

### 18 19 ***Limitations of the trials included in this review*** 20

21 Overall, the methodological quality of the included trails was low. The method of ran-  
22  
23 domization and allocation concealment were not described in all the included trials. Double-  
24  
25 blinding was reported in 8 trials and details of the blinding methods were reported in 3 trials.  
26  
27 Withdrawal rates of participants were less than 20% in 8 trails. Only Six trials performed in-  
28  
29 tention to treat analysis.  
30  
31

32 After assessment of the overall quality of the evidence, we downgraded our primary  
33  
34 outcomes from high to low or very low quality, because of the high risk of bias due to unclear  
35  
36 sequence generation and allocation concealment. In addition, we also found in some trials  
37  
38 that there were very small sample sizes and higher levels of statistical heterogeneity, which  
39  
40 caused serious inconsistency between the included trials.  
41  
42

### 43 ***Strengths and weaknesses*** 44

45 The present NMA integrated evidence from direct and indirect comparisons. The litera-  
46  
47 ture search strategy was extensive, which makes it unlikely that we missed any relevant trial.  
48  
49 Trial selection and data extraction including quality assessments were done independently by  
50  
51 two authors to minimize bias and transcription errors. In this NMA, we applied the GRADE  
52  
53 system to NMAs based on the GRADE working group to rate the quality of the evidence.  
54  
55  
56  
57  
58  
59  
60

Potential limitations to this review exist. Firstly, the sample sizes of our included RCTs were all small. Sample size calculations were not mentioned in any of the studies. Secondly, despite our exhaustive search, only 15 RCTs conducted in China were included in this review. North Korea and Russia also have a high incidence of KBD; some trials may have been published in local journals that were missed in our search. Finally, the heterogeneity in this meta-analysis was somewhat high, which could be explained by a lack of concealment of allocation, failure to perform an ITT analysis, small sample sizes of the studies included and differences between different preparations of selenium. As with heterogeneity between trials, inconsistency between direct and indirect comparisons was also near zero. Although we cannot rule out clinically relevant inconsistency, we have no indication that clinical characteristics of included patients or other trial characteristics confounded the indirect comparisons.

## **Conclusions**

### ***Implications for clinical practice***

Based on this NMA, it appears that all types of Se supplementation were more effective than placebo for the treatment of KBD in children. Ranking on efficacy indicated that Se salt were highest, followed by Se + VE, Se enriched yeast, Se, Se + VC, VC, and placebo/no treatment. Since the overall quality of the evidence was low or very low, the SUCRA values may be misleading and should be considered jointly with the GRADE confidence in the estimates for each comparison. The quality of the evidence is insufficient to draw a conclusion about what method of selenium supplementation is most effective. Se salt can be an economical and convenient strategy for controlling KBD in endemic areas. However, selenium overdose is toxic. Therefore, suitable dosages should be strictly controlled and content of selenium should be closely monitored in order to avoid harmful effects on health.

### ***Implications for research***

Since KBD among children has almost disappeared, we believe it unlikely that future trials will involve a RCT to demonstrate the clinically relevant benefit of any selenium supplementation for children with KBD. At present, there are no effective clinical measures to repair the cartilage damage of KBD in adults. Tissue engineering and gene therapy approaches may become the potential treatment strategy that can applied to the treatment of the KBD cartilage damages.

### **Contributors**

Dongmei Xie and Yulin Liao conceived the review question, reviewed studies for inclusion, assessed the included studies, extracted data, completed the first draft, and edited the review. Jirong Yue and Chao Zhang analyzed the data, did the literature search, advised and coordinated the review development, performed part of the writing and editing of the review, approved the final version of the review prior to submission, and is also a guarantor. Yanyan Wang, Chuanyao Deng and Ling Chen contributed to the development of the review question, edited and provided intellectual contributions to the review.

**Funding Statement:** This research was funded by China National Science & Technology Pillar Program (2007BA125B04).

**Conflict of interest:** We declare that we have no conflicts of interest.

**Role of the funding source:** The sponsors of the study had no role in study design, data collection, data analysis, data interpretation, or writing of the report. The corresponding author had full access to all the data in the study and had final responsibility for the decision to submit for publication.

**Acknowledgments:** Dr. Joseph H. Flaherty is especially acknowledged for editorial review and language assistance.

**Data sharing statement:** No additional data are available.

**Reference:**

1. Mathieu F, Begaux F, Lan ZY, Suetens C, Hinsenkamp M. Clinical manifestations of Kashin-Beck disease in Nyemo Valley, Tibet. *Int Orthop* 1997;21:151-6.
2. Sokoloff L. The history of Kashin-Beck disease. *N Y State J Med* 1989;89:343-51.
3. Allander E. Kashin-Beck disease. An analysis of research and public health activities based on a bibliography 1849-1992. *Scand J Rheumatol Suppl* 1994;99:1-36.
4. P. R. C. Ministry of Health. The prevention and control status of Kashin-Beck disease in 2011. Available at: <http://www.nhfpc.gov.cn/htmlfiles/zwgkzt/ptjnj/year2012/index2012.html>;2012.
5. Xiong G. Diagnostic, clinical and radiological characteristics of Kashin-Beck disease in Shaanxi Province, PR China. *Int Orthop* 2001;25:147-50.
6. Peng A, Yang C, Rui H, Li H. Study on the pathogenic factors of Kashin-Beck disease. *J Toxicol Environ Health* 1992;35:79-90.
7. Luo R, Liu G, Liu W, Pei F, Zhou Z, Li J, et al. Efficacy of celecoxib, meloxicam and paracetamol in elderly Kashin-Beck disease (KBD) patients. *International orthopaedics* 2011;35:1409-14.
8. Yu FF, Xia CT, Fang H, Han J, Younus MI, Guo X. Evaluation of the therapeutic effect of treatment with intra-articular hyaluronic acid in knees for Kashin-Beck disease: A meta-analysis. *Osteoarthritis Cartilage* 2014;22:718-25.
9. Mathieu F, Suetens C, Begaux F, De Maertelaer V, Hinsenkamp M. Effects of physical therapy on patients with Kashin-Beck disease in Tibet. *Int Orthop* 2001;25:191-3.
10. Yue J, Yang M, Yi S, Dong B, Li W, Yang Z, et al. Chondroitin sulfate and/or glucosamine hydrochloride for Kashin-Beck disease: a cluster-randomized, placebo-controlled study. *Osteoarthritis and cartilage* 2012;20:622-9.
11. Zhongmin T, Yang L, Zhou J, Gao D, Dong S, Xie J, et al. Comparison of treatment results of arthroscopic knee debridement alone with a combination of arthroscopic debridement and drilling decompression in knee Kashin-Beck disease (in Chinese). *Chin J Endo* 2009:371-4.
12. Liu FD, Wang ZL, Hinsenkamp M. Osteotomy at the knee for advanced cases of Kashin-Beck disease. *Int Orthop* 1998;22:87-91.
13. Guo X, Ma WJ, Zhang F, Ren FL, Qu CJ, Lammi MJ. Recent advances in the research of an endemic osteochondropathy in China: Kashin-Beck disease. *Osteoarthritis Cartilage* 2014;22:1774-83.
14. Zou K, Liu G, Wu T, Du L. Selenium for preventing Kashin-Beck osteoarthropathy in children: a

meta-analysis. *Osteoarthritis Cartilage* 2009;17:144-51.

15. Jirong Y, Huiyun P, Zhongzhe Y, Birong D, Weimin L, Ming Y, et al. Sodium selenite for treatment of Kashin-Beck disease in children: A systematic review of randomised controlled trials. *Osteoarthritis and Cartilage* 2012;20:605-13.

16. National Health and Family Planning Commission of the People's Republic of China. Diagnostic criteria of Kashin-Beck disease (GB16003-1995).[1995-12-15]

17. Liang S, Zhang F, Wang L, Yang Y, Lu X, Chen C. The effect of the treatment of Kaschin Beck disease (in Chinese). *Chin J Endo* 1996;15:378-80.

18. Higgins J, Green S. *Cochrane Handbook for Systematic Reviews of Interventions* (Version 5.1.0). The Cochrane Collaboration, 2011. Available at: <http://www.cochrane-handbook.org>.

19. Puhan MA, Schünemann HJ, Murad MH, Li T, Brignardello-Petersen R, Singh JA, et al. A GRADE Working Group approach for rating the quality of treatment effect estimates from network meta-analysis. *BMJ* 2014; 349:g5630.

20. Niu GH, Zhang BH, Song ZY, Pang ZG, Wang YY, Ma QH. An observation study on effect of oral sodium selenite for prevention and treatment of kashin-beck effect (in Chinese). *Heilongjiang Med J* 1981;15-7.

21. The Yongshou Scientific Survey Group of Kaschin-Beck Disease. Effect and mechanism of selenium in the prevention and cure of 424 Kaschin-Beck's patients (in Chinese). *Chin J Endemiol* 1982;1:145-50.

22. Wang DS, Fu BS, Sun QY, Yang WZ, Bao BJ, Huang FH, et al. Dynamic observation of sodium selenite and vitamin E in the treatment of Kashin Beck disease (in Chinese). *Chin J Endemiol* 1983;2:204-7.

23. Cui ZJ, Lin BH, Jin CS, Lin JZ. An observation on effect of the treatment of Kaschin-Beck disease using Vitamin C or sodium selenite (in Chinese). *End Dis Bull* 1984;1:63.

24. Niu GH, Zhang BZ, Li XZ, Liu JX, Zhu ZY, Hou SF. Results of study of two years on the preventing and controlling Kashin-Beck's disease with selenium seen under X-rays and discussion of etiology (in Chinese). *Chin J Endemiol* 1984;3:199-201.

25. Guo LB, Lu Q, Tang HF, Lei H, Dong HQ. An one year observation by X-ray on effect of the treatment of Kaschin-Beck disease using oral sodium selenite (in Chinese). *J Chengde Univ Med Sci* 1985:67-70.

26. Guo LB, Lu Q, Dong HQ, Tang HF, Lei H, Zhang ZM, et al. One year of observation on effect of selenium enriched yeast for treatment of Kaschin Beck disease (in Chinese). *Chin J Endemiol* 1986;5:16-20.

27. Niu GH, Zhang BZ, Hou SF, Zhu ZY, Li DZ, Zhong PL, et al. Study of two years on the preventing and controlling Kashin-Beck's disease with oral sodium selenite seen under X-rays (in Chinese). *J*



1  
2  
3  
4 Pract Endemio 1986;1:16-8.

5 28. Wu QX. An observation by X-ray on effect of the prevention and treatment of Kaschin-Beck dis-  
6 ease using oral sodium selenite (in Chinese). Chin J Endemiol 1986;5:210-20.

7 29. Deng JY. Effect of sodium selenite oral application on Kashin-Beck disease, a three years obser-  
8 vation (in Chinese). Chin J Endemiol 1988;7:117-20.

9 30. Niu GH, Zhang BZ, Hou SF. Effect of semis-dosage selenium on controlling of Kashin-Beck  
10 disease (in Chinese). Chin J Endemiol 1990:99-100.

11 31. Zhou XK, Wang WL, Wang EQ, Yu AL, Ren YG, Xu JM, et al. The observation on effecto of  
12 selenium and vitamin C for treating Kaschin Beck disease (in Chinese). End Dis Bull 1991:100-3.

13 32. Moreno-Reyes R, Mathieu F, Boelaert M, Begaux F, Suetens C, Rivera MT, et al. Selenium and  
14 iodine supplementation of rural Tibetan children affected by Kashin-Beck osteoarthopathy. Am J Clin  
15 Nutr 2003;78:137-44.

16 33. Chen Y, Huo JM, Wang ZL, Tan XW, Xue L, Geng D. A comparative research on the treatment  
17 effect of Se supplement , Vit C supplement and cereals dryness on Kaschin -Beck disease (in Chi-  
18 nese). Chin J Endemiol 2003;18:343-6.

19 34. Cai LW, Zhang YL. An observation by X-ray on effect of selenium in the treatment of 40  
20 Kaschin-Beck children (in Chinese). J Comm Med 2005;3:60-1.

21 35. Yao Y, Pei F, Kang P. Selenium, iodine, and the relation with Kashin-Beck disease. Nutrition  
22 2011;27:1095-100.

23 36. Wang Q, Li XX, Li L, Tian JH, Yang KH, Wu TX, et al. Correlation between selenium and  
24 Kaschin-Beck disease: A meta-analysis (in Chinese). Chin J Evid Based Med 2013;13:1421-30.

25 37. Yu FF, Han J, Wang X, Fang H, Liu H, Guo X. Salt-Rich Selenium for Prevention and Control  
26 Children with Kashin-Beck Disease: a Meta-analysis of Community-Based Trial. Biol Trace Elem  
27 Res 2016;170:25-32.

28 38. Guo X, Ding D, Wang Z, Lv S, Zhang J, Tan X, et al. A study on the reparative action of x-ray  
29 lesions in metaphyses and distal end of bone in children's fingers with kashin-beck disease treated by  
30 se-fortified wheat (in Chinese). Chin J Ctrl Endem Dis 1990:269-72.

31 39. Chen D, Ren S, Lu W, Li J, Fan L, Jia Z, et al. Effect of applying selenium fertilizer to improve  
32 soil and increase selenium level in food for prevention and treatment of Kaschin-Beck disease (in  
33 Chinese). J Env Sci 1993;5:299-309.

34 40. Xu GY, Lu XY, Cao XG. Analysis on monitoring data of Kaschin-Beck disease in Shannxi Prov-  
35 ince during 19 years (in Chinese). Chin J Contr End Dis 2009:442-6.

36 41. Ning Y, Wang X, Wang S, Zhang F, Zhang L, Lei Y, et al. Is it the appropriate time to stop apply-  
37 ing selenium enriched salt in kashin-beck disease areas in China? Nutrients 2015;7:6195-212.

38 42. Moreno-Reyes R, Suetens C, Mathieu F, Begaux F, Zhu D, Rivera MT, et al. Kashin-Beck osteo-  
39

1  
2  
3  
4 arthropathy in rural Tibet in relation to selenium and iodine status. N Engl J Med 1998;339:1112-20.

5 43. Sasaki S, Iwata H, Ishiguro N, Habuchi O, Miura T. Low-selenium diet, bone, and articular carti-  
6 lage in rats. Nutrition 1994;10:538-43.

7  
8 44. Goss AN, Sampson WJ, Townsend GC, McIntosh GH. Effect of iodine deficiency on craniofacial  
9 growth in young common marmosets (*Callithrix jacchus*). J Craniofac Genet Dev Biol 1988;8:225-33.  
10  
11  
12  
13  
14  
15  
16  
17  
18  
19  
20  
21  
22  
23  
24  
25  
26  
27  
28  
29  
30  
31  
32  
33  
34  
35  
36  
37  
38  
39  
40  
41  
42  
43  
44  
45  
46  
47  
48  
49  
50  
51  
52  
53  
54  
55  
56  
57  
58  
59  
60

For peer review only

## Figure Legends

### Fig 1 Flow diagram of included study

### Fig 2 Network of eligible comparisons for treatment efficacy network meta-analysis for KBD

The width of lines is proportional to the number of studies compared in every pair of treatments, and the size of nodes is proportional to the total sample size of each treatment. Two-arm study n=11; Three-arm study n=3 (Cui 1984<sup>23</sup>, Guo 1986<sup>26</sup>, Chen 2003<sup>33</sup>); Four-arm study n=1 (Zhou 1991<sup>31</sup>)  
OR = Odds ratio, CI = Confidence intervals, Se = Sodium selenite, Se salt = selenium salt, VC = vitamin C, Se + VC = the combination of sodium selenite with vitamin C; Se + VE = the combination of sodium selenite with vitamin E, Se yeast = selenium enriched yeast.

### Fig 3 Network estimates of mean ORs, their 95% confidence intervals and 95% prediction intervals (red extensions)

OR = Odds ratio, CI = Confidence intervals, PrI = prediction intervals, Se = Sodium selenite, Se salt = selenium salt, VC = vitamin C, Se + VC = the combination of sodium selenite with vitamin C; Se + VE = the combination of sodium selenite with vitamin E, Se yeast = selenium enriched yeast.

### Fig 4 Consistency test in the network Meta-analysis

IF= inconsistency factor, OR = Odds ratio, CI = Confidence intervals, Se = Sodium selenite, Se salt = selenium salt, VC = vitamin C, Se + VC = the combination of sodium selenite with vitamin C; Se + VE = the combination of sodium selenite with vitamin E, Se yeast = selenium enriched yeast.

The x-axis is Log OR, and the vertical line is 0. IF is the absolute inconsistency factor, meaning the logarithm of the ratio of odds ratios (RoR) of direct and indirect evidence for each comparison loop. The absolute inconsistency factor values and confidence intervals are truncated at zero indicate no significant difference of inconsistency.

### Fig 5 SUCRA for the cumulative probabilities

SUCRA=surface under cumulative ranking

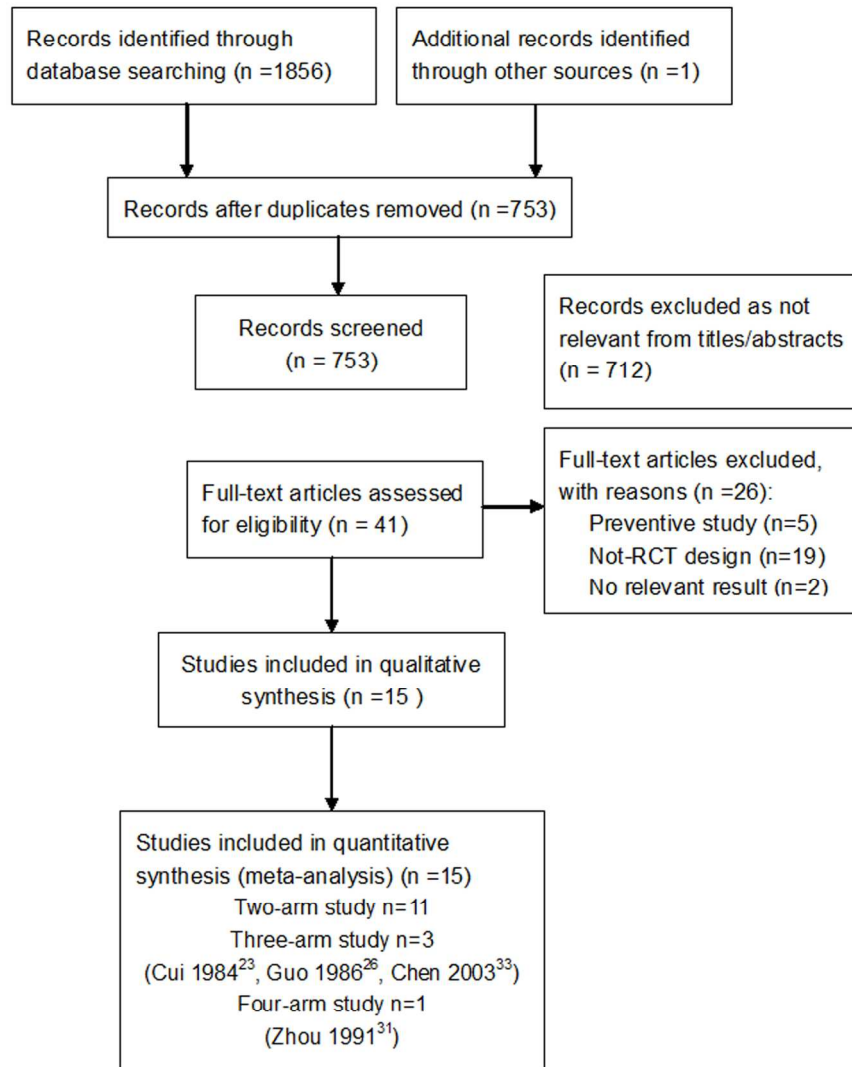

Fig 1 Flow diagram of included study

154x182mm (300 x 300 DPI)

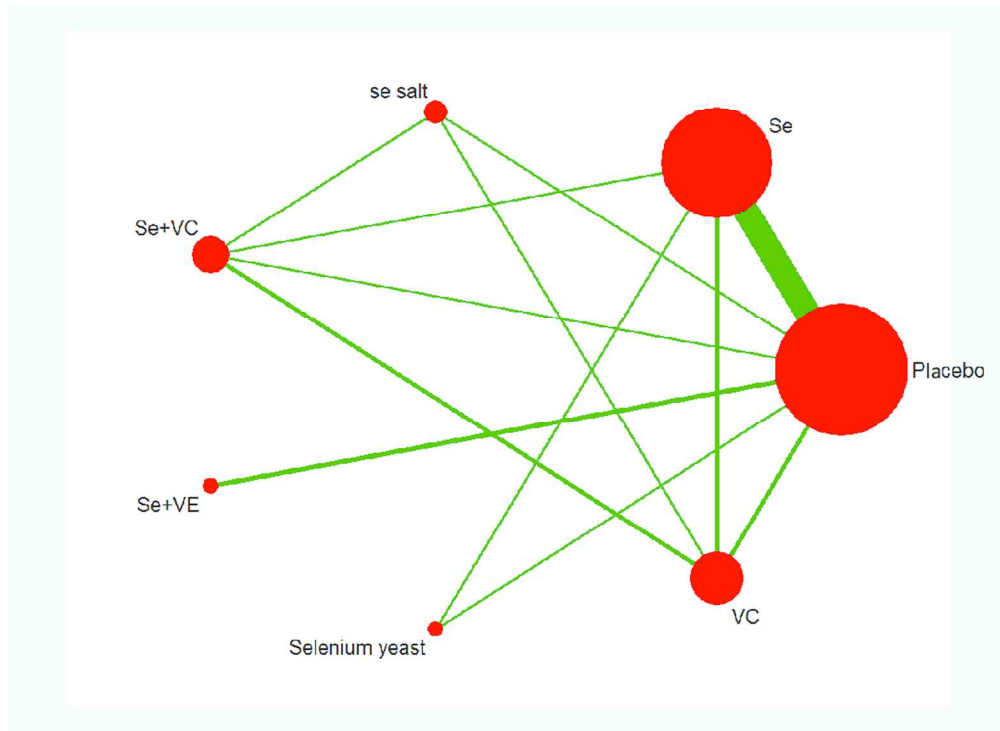

Fig 2 Network of eligible comparisons for treatment efficacy network meta-analysis for KBD. The width of lines is proportional to the number of studies compared in every pair of treatments, and the size of nodes is proportional to the total sample size of each treatment. Two-arm study  $n=11$ ; Three-arm study  $n=3$  (Cui 1984, Guo 1986, Chen 2003); Four-arm study  $n=1$  (Zhou 1991)<sub>T</sub>. OR = Odds ratio, CI = Confidence intervals, Se = Sodium selenite, Se salt = selenium salt, VC = vitamin C, Se + VC = the combination of sodium selenite with vitamin C ; Se + VE = the combination of sodium selenite with vitamin E, Se yeast = selenium enriched yeast.

381x277mm (300 x 300 DPI)

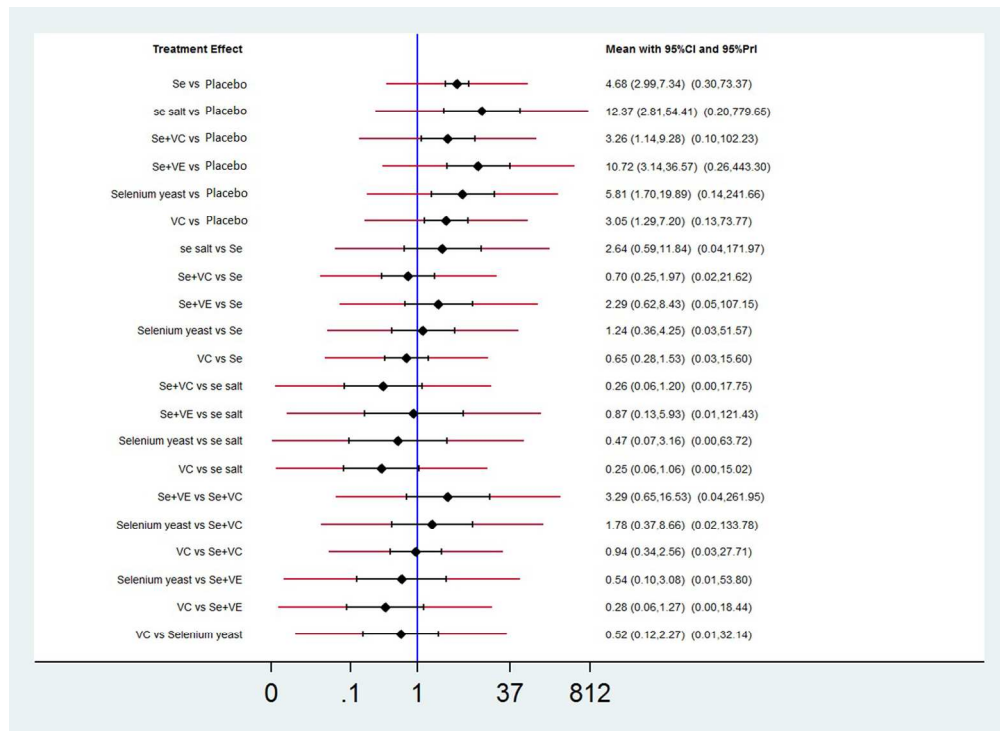

Fig 3 Network estimates of mean ORs, their 95% confidence intervals and 95% prediction in-tervals (red extensions)<sup>†</sup>. OR = Odds ratio, CI = Confidence intervals, PrI = prediction intervals, Se = Sodium selenite, Se salt = selenium salt, VC = vitamin C, Se + VC = the combination of sodium selenite with vitamin C; Se + VE = the combination of sodium selenite with vitamin E, Se yeast = selenium enriched yeast.<sup>†</sup>

454x330mm (300 x 300 DPI)

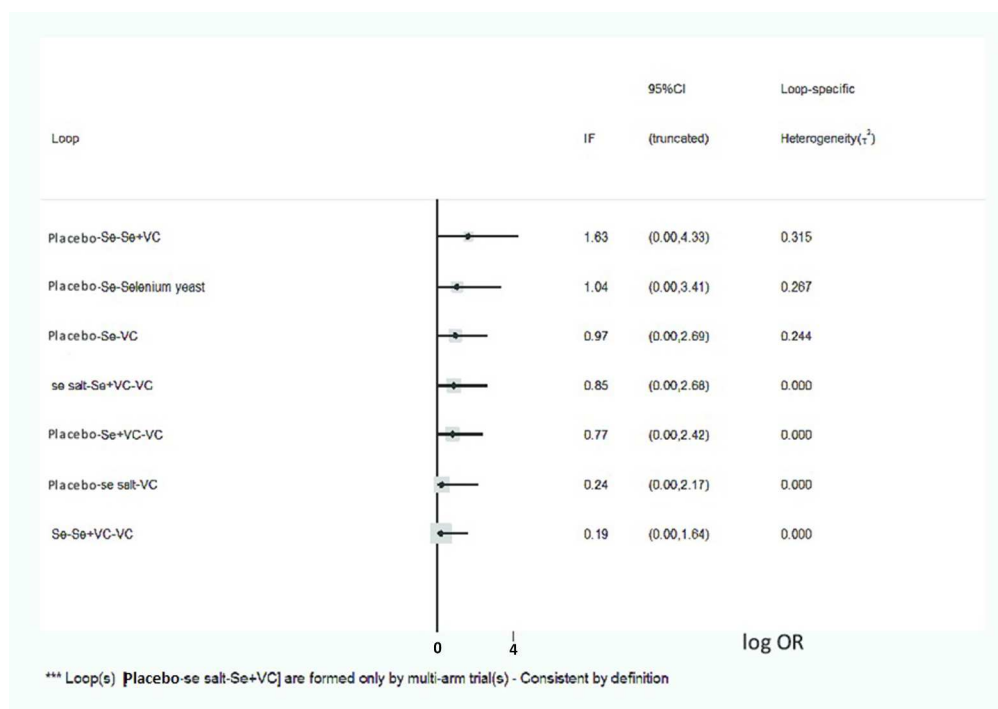

Fig 4 Consistency test in the network Meta-analysis. † IF= inconsistency factor, OR = Odds ratio, CI = Confidence intervals, Se = Sodium selenite, Se salt = selenium salt, VC = vitamin C, Se + VC = the combination of sodium selenite with vitamin C; Se + VE = the combination of sodium selenite with vitamin E, Se yeast = selenium enriched yeast.† The x-axis is Log OR, and the vertical line is 0. IF is the absolute inconsistency factor, meaning the logarithm of the ratio of odds ratios (RoR) of direct and indirect evidence for each comparison loop. The absolute inconsistency factor values and confidence intervals are truncated at zero indicate no significant difference of inconsistency.†

308x217mm (300 x 300 DPI)

1  
2  
3  
4  
5  
6  
7  
8  
9  
10  
11  
12  
13  
14  
15  
16  
17  
18  
19  
20  
21  
22  
23  
24  
25  
26  
27  
28  
29  
30  
31  
32  
33  
34  
35  
36  
37  
38  
39  
40  
41  
42  
43  
44  
45  
46  
47  
48  
49  
50  
51  
52  
53  
54  
55  
56  
57  
58  
59  
60

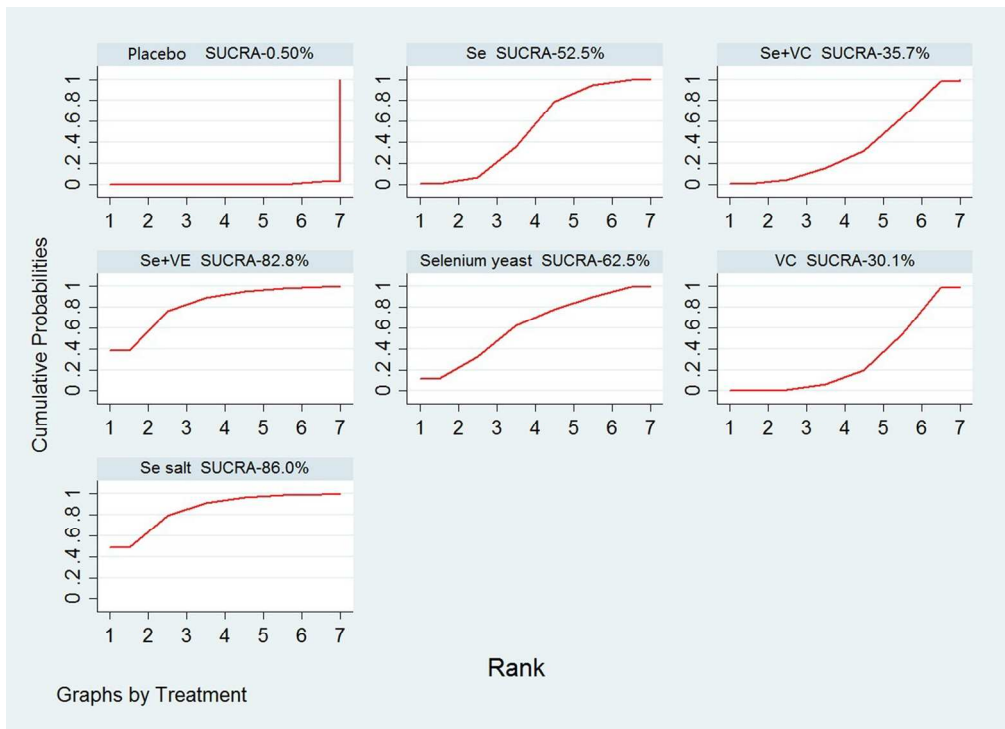

Fig 5 SUCRA for the cumulative probabilities† . SUCRA=surface under cumulative ranking†

450x328mm (300 x 300 DPI)

Pre-view only



**Appendix box 1 Ovid search strategy**

#1 exp kashin-beck disease/  
#2 kashin-beck disease.tw.  
#3 kashin-bek disease.tw.  
#4 big bone disease.tw.  
#5 endemic osteoarthritis.tw.  
#6 Urov disease.tw.  
#7 1 or 2 or 3 or 4 or 5 or 6  
#8 sodium selenite.tw.  
#9 selenium .tw.  
#10 Se salt.tw.  
#11 enriched yeast  
#12 8 or 9 or 10 or 11  
#13 7 AND 12  
#14 randomized controlled trial.pt.  
#15 controlled clinical trial.pt.  
#16 randmoized.ab.  
#17 placebo.ab.  
#18 randomly.ab.  
#19 trial.ab.  
#20 groups.ab.  
#21 14 or 15 or 16 or 17 or 18 or 19 or 20  
#22 13 and 21  
#23 limit #22 to human

**Appendix Table 1 Characteristics of excluded studies (ordered by study ID)**

| <b>Study</b> | <b>Reason for exclusion</b> |
|--------------|-----------------------------|
| Ding 1985    | No relevant result          |
| Fan 1986     | Not a RCT                   |
| Guo 1990     | Not a RCT                   |
| Han 2013     | Not a RCT                   |
| He 1988      | Not a RCT                   |
| Huang 1959   | Not a RCT                   |
| Li 1986      | Not a RCT                   |
| Li 2004      | Preventive study            |
| Liang 1986   | Preventive study            |
| Ma 1996      | Not a RCT                   |
| Sun 2008     | Not a RCT                   |
| Suolang 2008 | Not a RCT                   |
| Wang 1983    | Preventive study            |
| Wang 1988    | Not a RCT                   |
| Wang 1989    | Preventive study            |
| Wu 1991      | Preventive study            |
| Yang 2009    | Not a RCT                   |
| Yang 2010    | Not a RCT                   |
| Yi 2006      | Not a RCT                   |
| Yu 2016      | Not a RCT                   |
| Zhang 1989   | Not a RCT                   |
| Zhang 1996   | No relevant result          |
| Zhang 2006   | Not a RCT                   |
| Zhang 2009   | Not a RCT                   |
| Zhong 1986   | Not a RCT                   |
| Zhou 1998    | Not a RCT                   |

Appendix Table 2 Characteristics of included trials

| Study                   | Case No. |       | Age  |      | Intervention                                                                                                              | Control                                  | Follow-up (months) | Outcome                                                                                                              |
|-------------------------|----------|-------|------|------|---------------------------------------------------------------------------------------------------------------------------|------------------------------------------|--------------------|----------------------------------------------------------------------------------------------------------------------|
|                         | I        | C     | I    | C    |                                                                                                                           |                                          |                    |                                                                                                                      |
| Niu 1981 <sup>20</sup>  | 27       | 29    | 6~13 | 6~13 | Se + VE: Se tablet 2mg/week +VE 15mg/day                                                                                  | Placebo/week                             | 12                 | Improvement of metaphyseal lesions on X-ray                                                                          |
| YSSG 1982 <sup>21</sup> | 166      | 159   | 3~13 | 3~13 | Se tablet, 1 mg/week (3-10 yrs), 2 mg/week (11-13 yrs)                                                                    | Placebo/week                             | 12                 | Improvement of metaphyseal lesions on X-ray                                                                          |
| Wang 1983 <sup>22</sup> | 47       | 42    | 5~15 | 5~15 | Se + VC: Se tablet 2mg/week +VE 15mg/day                                                                                  | No treatment                             | 11                 | Improvement of metaphyseal lesions on X-ray                                                                          |
| Cui 1984 <sup>23*</sup> | 30       | 30/30 | 7~19 | 7~19 | Se tablet, 1 mg/week (7-10 yrs), 2 mg/week (11-19 yrs)                                                                    | ①VC 200 mg 3 times/day;<br>②Placebo/week | 6~12               | Improvement of metaphyseal lesions on X-ray                                                                          |
| Niu 1984 <sup>24</sup>  | 56       | 59    | 6~13 | 6~13 | Se tablet first week: 1.0 mg/day (< 10 yrs), 2.0 mg/day (> 11 yrs); after: 1.0 mg/week (< 10 yrs), 2.0 mg/week (> 11 yrs) | Placebo/week                             | 24                 | Improvement of metaphyseal lesions on X-ray<br>Repairing rate at the distal end of phalanges in hands on X-ray films |
| Guo 1985 <sup>25</sup>  | 50       | 50    | 5~15 | 5~15 | Se tablet, 1 mg/week (<5 yrs), 2 mg/week (>5 yrs)                                                                         | Placebo/week                             | 12                 | Improvement of metaphyseal lesions on X-ray                                                                          |

1  
2  
3  
4  
5  
6  
7  
8  
9  
10  
11  
12  
13  
14  
15  
16  
17  
18  
19  
20  
21  
22  
23  
24  
25  
26  
27  
28  
29  
30  
31  
32  
33  
34  
35  
36  
37  
38  
39  
40  
41  
42  
43  
44  
45  
46

| Study                   | Case No. |     | Age  |      | Intervention                                                                                                | Control      | Follow-up (months) | Outcome                                                                                                              |
|-------------------------|----------|-----|------|------|-------------------------------------------------------------------------------------------------------------|--------------|--------------------|----------------------------------------------------------------------------------------------------------------------|
|                         | I        | C   | I    | C    |                                                                                                             |              |                    |                                                                                                                      |
| Guo 1986 <sup>26*</sup> | 60/60    | 60  | 5~14 | 5~14 | ①Se tablet, 0.5mg/week (<7 yrs), 1 mg/week (>8 yrs);<br>②Se yeast, 0.5mg/week (<7 yrs), 1 mg/week (>8 yrs); | Placebo/week | 13                 | Improvement of metaphyseal lesions on X-ray                                                                          |
| Niu 1986 <sup>27</sup>  | 285      | 277 | 6~13 | 6~13 | Se tablet, 1 mg/week (<10 yrs), 2 mg/week (>10 yrs)                                                         | Placebo/week | 12~24              | Improvement of metaphyseal lesions on X-ray<br>Repairing rate at the distal end of phalanges in hands on X-ray films |
| Wu 1986 <sup>28</sup>   | 171      | 177 | 5~16 | 5~16 | Se tablet, 1 mg/week (< 10 yrs), 2 mg/week (> 10 yrs)                                                       | Placebo/week | 12                 | Improvement of metaphyseal lesions on X-ray                                                                          |
| Deng 1988 <sup>29</sup> | 43       | 46  | 2~13 | 2~13 | Se tablet, no details                                                                                       | No treatment | 36                 | Improvement of metaphyseal lesions on X-ray<br>Repairing rate at the distal end of phalanges in hands on X-ray films |

| Study                           | Case No. |       | Age     |        | Intervention                                                                                                                                                               | Control                          | Follow-up (months) | Outcome                                                                                                              |
|---------------------------------|----------|-------|---------|--------|----------------------------------------------------------------------------------------------------------------------------------------------------------------------------|----------------------------------|--------------------|----------------------------------------------------------------------------------------------------------------------|
|                                 | I        | C     | I       | C      |                                                                                                                                                                            |                                  |                    |                                                                                                                      |
| Niu 1990 <sup>30</sup>          | 210      | 228   | 6~13    | 6~13   | Se tablet, first week: 0.5 mg/day (< 5 yrs), 1.0 mg/day (6-10 yrs), 2.0 mg/day (> 11 yrs); after: 1.0 mg/month (< 5 yrs), 2.0 mg/month (6-10 yrs), 4.0 mg/month (> 11 yrs) | Placebo/month                    | 12                 | Improvement of metaphyseal lesions on X-ray                                                                          |
| Zhou 1991 <sup>31#</sup>        | 25/30    | 35/29 | 4~12    | 4~12   | ①Se + VC: Se tablet 1mg/10day+ VC 100mg/day;<br>②Se salt (sodium selenite: salt = 1:60,000) /10day                                                                         | ③VC, 300mg/day;<br>④No treatment | 12                 | Improvement of metaphyseal lesions on X-ray                                                                          |
| Moreno-Reyes 2003 <sup>32</sup> | 113      | 95    | 10±0.28 | 10±0.3 | Se tablet, 1 mg/week                                                                                                                                                       | Placebo/week                     | 12                 | Improvement of metaphyseal lesions on X-ray<br>Repairing rate at the distal end of phalanges in hands on X-ray films |
| Chen 2003 <sup>33*</sup>        | 50/50    | 50    | 6~11    | 6~11   | ①Se tablet 1mg/week;<br>② Se + VC: Se tablet 1mg/week+ VC 300 mg 2 times/day                                                                                               | VC 300mg bid                     | 12                 | Improvement of metaphyseal lesions on X-ray                                                                          |

1  
2  
3  
4  
5  
6  
7  
8  
9  
10  
11  
12  
13  
14  
15  
16  
17  
18  
19  
20  
21  
22  
23  
24  
25  
26  
27  
28  
29  
30  
31  
32  
33  
34  
35  
36  
37  
38  
39  
40  
41  
42  
43  
44  
45  
46

| Study                  | Case No. |    | Age  |      | Intervention                                                | Control      | Follow-up (months) | Outcome                                                                                                              |
|------------------------|----------|----|------|------|-------------------------------------------------------------|--------------|--------------------|----------------------------------------------------------------------------------------------------------------------|
|                        | I        | C  | I    | C    |                                                             |              |                    |                                                                                                                      |
| Cai 2005 <sup>34</sup> | 31       | 31 | 7~13 | 7~13 | Se tablet, 2mg/10 days (7-10 yrs), 3 mg/10 days (11-13 yrs) | No treatment | 18                 | Improvement of metaphyseal lesions on X-ray<br>Repairing rate at the distal end of phalanges in hands on X-ray films |

I= intervention, C = control, YSSG = Yongshou scientific survey group of Kashin-Beck Disease, yrs = years, Se = Sodium selenite, Se salt =selenium salt, VC = vitamin C, Se + VC = the combination of sodium selenite with vitamin C ; Se + VE = the combination of sodium selenite with vitamin E, Se yeast = selenium enriched yeast. \* Three arms study, # Four arms study

**Appendix Table 3 Risk of Bias of Included Studies**

| Study                   | Balanced allocation | Allocation concealment | Blinding     | Completeness of outcome | Selective outcome reporting | Other Bias            | overall assessment* |
|-------------------------|---------------------|------------------------|--------------|-------------------------|-----------------------------|-----------------------|---------------------|
| Niu 1981 <sup>20</sup>  | Unclear             | Unclear                | Double-blind | Low                     | Low                         | Low                   | Unclear             |
| YSSG 1982 <sup>21</sup> | Unclear             | Unclear                | Double-blind | Low, No dropout         | Low                         | Low                   | Unclear             |
| Wang 1983 <sup>22</sup> | unclear             | unclear                | Double-blind | High, dropouts >20%     | Low                         | High, no ITT analysis | High                |
| Cui 1984 <sup>23</sup>  | unclear             | unclear                | Double-blind | High, dropouts >20%     | Low                         | High, no ITT analysis | High                |
| Niu 1984 <sup>24</sup>  | Unclear             | Unclear                | Double-blind | Low, No dropout         | Low                         | High, no ITT analysis | High                |
| Guo 1985 <sup>25</sup>  | Unclear             | Unclear                | Not Used     | High, dropouts >20%     | Low                         | High, no ITT analysis | High                |
| Guo 1986 <sup>26</sup>  | Unclear             | Unclear                | Unclear      | High, dropouts >20%     | Low                         | High, no ITT analysis | High                |
| Niu 1986 <sup>27</sup>  | Unclear             | Unclear                | Double-blind | Low, No dropout         | Low                         | Low                   | Unclear             |

|    |                                 |         |         |              |                           |     |                       |         |
|----|---------------------------------|---------|---------|--------------|---------------------------|-----|-----------------------|---------|
| 1  |                                 |         |         |              |                           |     |                       |         |
| 2  |                                 |         |         |              |                           |     |                       |         |
| 3  | Wu 1986 <sup>28</sup>           | Unclear | Unclear | Double-blind | Unclear, No dropout < 20% | Low | High, no ITT analysis | High    |
| 4  |                                 |         |         |              |                           |     |                       |         |
| 5  |                                 |         |         |              |                           |     |                       |         |
| 6  |                                 |         |         |              |                           |     |                       |         |
| 7  |                                 |         |         |              |                           |     |                       |         |
| 8  | Deng 1988 <sup>29</sup>         | Unclear | Unclear | Unclear      | Low, drop out <10%        | Low | High, no ITT analysis | High    |
| 9  |                                 |         |         |              |                           |     |                       |         |
| 10 |                                 |         |         |              |                           |     |                       |         |
| 11 |                                 |         |         |              |                           |     |                       |         |
| 12 | Niu 1990 <sup>30</sup>          | Unclear | Unclear | Single-blind | Low, No dropout           | Low | Low                   | Unclear |
| 13 |                                 |         |         |              |                           |     |                       |         |
| 14 |                                 |         |         |              |                           |     |                       |         |
| 15 | Zhou 1991 <sup>31</sup>         | Unclear | Unclear | Unclear      | Low, No dropout           | Low | Low                   | Unclear |
| 16 |                                 |         |         |              |                           |     |                       |         |
| 17 |                                 |         |         |              |                           |     |                       |         |
| 18 | Moreno-Reyes 2003 <sup>32</sup> | Unclear | Unclear | Double-blind | Unclear, No dropout < 20% | Low | High no ITT analysis  | High    |
| 19 |                                 |         |         |              |                           |     |                       |         |
| 20 | Chen 2003 <sup>33</sup>         | Unclear | Unclear | Unclear      | High, dropouts >20%       | Low | High, no ITT analysis | High    |
| 21 |                                 |         |         |              |                           |     |                       |         |
| 22 |                                 |         |         |              |                           |     |                       |         |
| 23 |                                 |         |         |              |                           |     |                       |         |
| 24 |                                 |         |         |              |                           |     |                       |         |
| 25 |                                 |         |         |              |                           |     |                       |         |
| 26 | Cai 2005 <sup>34</sup>          | Unclear | Unclear | Not Used     | Low, No dropout           | Low | Low                   | Unclear |
| 27 |                                 |         |         |              |                           |     |                       |         |
| 28 |                                 |         |         |              |                           |     |                       |         |

---

29 \*: Overall Score: Low risk of bias = no bias detected in any domain; Unclear risk of bias = one category or more is potentially at risk of bias; High risk of bias = one  
30 category or more is at high risk of bias.

31 ITT = intention to treat



**Appendix Table 4 Repair rate of metaphyseal lesions of different comparisons in included studies**

| comparison                  | No. of study | No. of patients | Repair rate         |                     |
|-----------------------------|--------------|-----------------|---------------------|---------------------|
|                             |              |                 | Treatment 1 (n1/N1) | Treatment 2 (n2/N2) |
| <b>Se vs. placebo</b>       | 11           | 2427            | 887/1215            | 511/1212            |
| <b>Se vs. Se+VC</b>         | 1            | 100             | 30/50               | 33/50               |
| <b>Se vs. Se yeast</b>      | 1            | 120             | 33/60               | 42/60               |
| <b>Se vs. VC</b>            | 2            | 160             | 44/80               | 41/80               |
| <b>Se salt vs. placebo</b>  | 1            | 59              | 24/30               | 10/29               |
| <b>Se salt vs. Se+VC</b>    | 1            | 55              | 24/30               | 10/25               |
| <b>Se salt vs. VC</b>       | 1            | 65              | 24/30               | 17/35               |
| <b>Se+VC vs. placebo</b>    | 2            | 154             | 43/75               | 32/79               |
| <b>Se+VC vs. VC</b>         | 2            | 160             | 43/75               | 44/85               |
| <b>Se+VE vs. placebo</b>    | 2            | 145             | 68/74               | 32/71               |
| <b>Se yeast vs. placebo</b> | 1            | 120             | 42/60               | 23/60               |
| <b>VC vs. placebo</b>       | 2            | 124             | 33/65               | 20/59               |

1 **PRISMA NMA Checklist of Items to Include When Reporting A Systematic Review**  
 2 **Involving a Network Meta-analysis**

| Section/Topic             | Item # | Checklist Item                                                                                                                                                                                                                                                                                                                                                                                                                                                                                                                                                                                                                                                                                                                                                                          | Reported on Page #                               |
|---------------------------|--------|-----------------------------------------------------------------------------------------------------------------------------------------------------------------------------------------------------------------------------------------------------------------------------------------------------------------------------------------------------------------------------------------------------------------------------------------------------------------------------------------------------------------------------------------------------------------------------------------------------------------------------------------------------------------------------------------------------------------------------------------------------------------------------------------|--------------------------------------------------|
| <b>TITLE</b>              |        |                                                                                                                                                                                                                                                                                                                                                                                                                                                                                                                                                                                                                                                                                                                                                                                         |                                                  |
| Title                     | 1      | Identify the report as a systematic review <i>incorporating a network meta-analysis (or related form of meta-analysis)</i> .                                                                                                                                                                                                                                                                                                                                                                                                                                                                                                                                                                                                                                                            | Page 1                                           |
| <b>ABSTRACT</b>           |        |                                                                                                                                                                                                                                                                                                                                                                                                                                                                                                                                                                                                                                                                                                                                                                                         |                                                  |
| Structured summary        | 2      | Provide a structured summary including, as applicable:<br><b>Background:</b> main objectives<br><b>Methods:</b> data sources; study eligibility criteria, participants, and interventions; study appraisal; and <i>synthesis methods, such as network meta-analysis</i> .<br><b>Results:</b> number of studies and participants identified; summary estimates with corresponding confidence/credible intervals; <i>treatment rankings may also be discussed. Authors may choose to summarize pairwise comparisons against a chosen treatment included in their analyses for brevity.</i><br><b>Discussion/Conclusions:</b> limitations; conclusions and implications of findings.<br><b>Other:</b> primary source of funding; systematic review registration number with registry name. | Page 3                                           |
| <b>INTRODUCTION</b>       |        |                                                                                                                                                                                                                                                                                                                                                                                                                                                                                                                                                                                                                                                                                                                                                                                         |                                                  |
| Rationale                 | 3      | Describe the rationale for the review in the context of what is already known, <i>including mention of why a network meta-analysis has been conducted</i> .                                                                                                                                                                                                                                                                                                                                                                                                                                                                                                                                                                                                                             | Page 5                                           |
| Objectives                | 4      | Provide an explicit statement of questions being addressed, with reference to participants, interventions, comparisons, outcomes, and study design (PICOS).                                                                                                                                                                                                                                                                                                                                                                                                                                                                                                                                                                                                                             | Page 6                                           |
| <b>METHODS</b>            |        |                                                                                                                                                                                                                                                                                                                                                                                                                                                                                                                                                                                                                                                                                                                                                                                         |                                                  |
| Protocol and registration | 5      | Indicate whether a review protocol exists and if and where it can be accessed (e.g., Web address); and, if available, provide registration information, including registration number.                                                                                                                                                                                                                                                                                                                                                                                                                                                                                                                                                                                                  | Page 6<br>Registration number:<br>CRD42016051874 |
| Eligibility criteria      | 6      | Specify study characteristics (e.g., PICOS, length of follow-up) and report characteristics (e.g., years considered, language, publication status) used as criteria for eligibility, giving rationale. <i>Clearly describe eligible treatments included in the treatment network, and note whether any have been clustered or merged into the same node (with justification)</i> .                                                                                                                                                                                                                                                                                                                                                                                                      | Page 6-7                                         |
| Information sources       | 7      | Describe all information sources (e.g., databases with dates of coverage, contact with study authors to identify additional studies) in the search and date last searched.                                                                                                                                                                                                                                                                                                                                                                                                                                                                                                                                                                                                              | Page 6                                           |

|    |                                        |           |                                                                                                                                                                                                                                                                                                                                                                                                                                                   |                |
|----|----------------------------------------|-----------|---------------------------------------------------------------------------------------------------------------------------------------------------------------------------------------------------------------------------------------------------------------------------------------------------------------------------------------------------------------------------------------------------------------------------------------------------|----------------|
| 1  | Search                                 | 8         | Present full electronic search strategy for at least one database, including any limits used, such that it could be repeated.                                                                                                                                                                                                                                                                                                                     | Page 6         |
| 2  |                                        |           |                                                                                                                                                                                                                                                                                                                                                                                                                                                   |                |
| 3  |                                        |           |                                                                                                                                                                                                                                                                                                                                                                                                                                                   |                |
| 4  | Study selection                        | 9         | State the process for selecting studies (i.e., screening, eligibility, included in systematic review, and, if applicable, included in the meta-analysis).                                                                                                                                                                                                                                                                                         | Page 7         |
| 5  |                                        |           |                                                                                                                                                                                                                                                                                                                                                                                                                                                   |                |
| 6  |                                        |           |                                                                                                                                                                                                                                                                                                                                                                                                                                                   |                |
| 7  | Data collection process                | 10        | Describe method of data extraction from reports (e.g., piloted forms, independently, in duplicate) and any processes for obtaining and confirming data from investigators.                                                                                                                                                                                                                                                                        | Page 7         |
| 8  |                                        |           |                                                                                                                                                                                                                                                                                                                                                                                                                                                   |                |
| 9  |                                        |           |                                                                                                                                                                                                                                                                                                                                                                                                                                                   |                |
| 10 |                                        |           |                                                                                                                                                                                                                                                                                                                                                                                                                                                   |                |
| 11 | Data items                             | 11        | List and define all variables for which data were sought (e.g., PICOS, funding sources) and any assumptions and simplifications made.                                                                                                                                                                                                                                                                                                             | Page 6-8       |
| 12 |                                        |           |                                                                                                                                                                                                                                                                                                                                                                                                                                                   |                |
| 13 |                                        |           |                                                                                                                                                                                                                                                                                                                                                                                                                                                   |                |
| 14 | <b>Geometry of the network</b>         | <b>S1</b> | Describe methods used to explore the geometry of the treatment network under study and potential biases related to it. This should include how the evidence base has been graphically summarized for presentation, and what characteristics were compiled and used to describe the evidence base to readers.                                                                                                                                      | Page 9 & Fig 2 |
| 15 |                                        |           |                                                                                                                                                                                                                                                                                                                                                                                                                                                   |                |
| 16 |                                        |           |                                                                                                                                                                                                                                                                                                                                                                                                                                                   |                |
| 17 |                                        |           |                                                                                                                                                                                                                                                                                                                                                                                                                                                   |                |
| 18 |                                        |           |                                                                                                                                                                                                                                                                                                                                                                                                                                                   |                |
| 19 |                                        |           |                                                                                                                                                                                                                                                                                                                                                                                                                                                   |                |
| 20 |                                        |           |                                                                                                                                                                                                                                                                                                                                                                                                                                                   |                |
| 21 | Risk of bias within individual studies | 12        | Describe methods used for assessing risk of bias of individual studies (including specification of whether this was done at the study or outcome level), and how this information is to be used in any data synthesis.                                                                                                                                                                                                                            | Page 10        |
| 22 |                                        |           |                                                                                                                                                                                                                                                                                                                                                                                                                                                   |                |
| 23 |                                        |           |                                                                                                                                                                                                                                                                                                                                                                                                                                                   |                |
| 24 |                                        |           |                                                                                                                                                                                                                                                                                                                                                                                                                                                   |                |
| 25 | Summary measures                       | 13        | State the principal summary measures (e.g., risk ratio, difference in means). <i>Also describe the use of additional summary measures assessed, such as treatment rankings and surface under the cumulative ranking curve (SUCRA) values, as well as modified approaches used to present summary findings from meta-analyses.</i>                                                                                                                 | Page 8-9       |
| 26 |                                        |           |                                                                                                                                                                                                                                                                                                                                                                                                                                                   |                |
| 27 |                                        |           |                                                                                                                                                                                                                                                                                                                                                                                                                                                   |                |
| 28 |                                        |           |                                                                                                                                                                                                                                                                                                                                                                                                                                                   |                |
| 29 |                                        |           |                                                                                                                                                                                                                                                                                                                                                                                                                                                   |                |
| 30 |                                        |           |                                                                                                                                                                                                                                                                                                                                                                                                                                                   |                |
| 31 | Planned methods of analysis            | 14        | Describe the methods of handling data and combining results of studies for each network meta-analysis. This should include, but not be limited to: <ul style="list-style-type: none"> <li>• <i>Handling of multi-arm trials;</i></li> <li>• <i>Selection of variance structure;</i></li> <li>• <i>Selection of prior distributions in Bayesian analyses; and</i></li> <li>• <i>Assessment of model fit.</i></li> </ul>                            | Page 8-9       |
| 32 |                                        |           |                                                                                                                                                                                                                                                                                                                                                                                                                                                   |                |
| 33 |                                        |           |                                                                                                                                                                                                                                                                                                                                                                                                                                                   |                |
| 34 |                                        |           |                                                                                                                                                                                                                                                                                                                                                                                                                                                   |                |
| 35 |                                        |           |                                                                                                                                                                                                                                                                                                                                                                                                                                                   |                |
| 36 |                                        |           |                                                                                                                                                                                                                                                                                                                                                                                                                                                   |                |
| 37 |                                        |           |                                                                                                                                                                                                                                                                                                                                                                                                                                                   |                |
| 38 |                                        |           |                                                                                                                                                                                                                                                                                                                                                                                                                                                   |                |
| 39 |                                        |           |                                                                                                                                                                                                                                                                                                                                                                                                                                                   |                |
| 40 | <b>Assessment of Inconsistency</b>     | <b>S2</b> | Describe the statistical methods used to evaluate the agreement of direct and indirect evidence in the treatment network(s) studied. Describe efforts taken to address its presence when found.                                                                                                                                                                                                                                                   | Page 8-9       |
| 41 |                                        |           |                                                                                                                                                                                                                                                                                                                                                                                                                                                   |                |
| 42 |                                        |           |                                                                                                                                                                                                                                                                                                                                                                                                                                                   |                |
| 43 |                                        |           |                                                                                                                                                                                                                                                                                                                                                                                                                                                   |                |
| 44 | Risk of bias across studies            | 15        | Specify any assessment of risk of bias that may affect the cumulative evidence (e.g., publication bias, selective reporting within studies).                                                                                                                                                                                                                                                                                                      | Page 10        |
| 45 |                                        |           |                                                                                                                                                                                                                                                                                                                                                                                                                                                   |                |
| 46 |                                        |           |                                                                                                                                                                                                                                                                                                                                                                                                                                                   |                |
| 47 | Additional analyses                    | 16        | Describe methods of additional analyses if done, indicating which were pre-specified. This may include, but not be limited to, the following: <ul style="list-style-type: none"> <li>• Sensitivity or subgroup analyses;</li> <li>• Meta-regression analyses;</li> <li>• <i>Alternative formulations of the treatment network; and</i></li> <li>• <i>Use of alternative prior distributions for Bayesian analyses (if applicable).</i></li> </ul> | Page 7-9       |
| 48 |                                        |           |                                                                                                                                                                                                                                                                                                                                                                                                                                                   |                |
| 49 |                                        |           |                                                                                                                                                                                                                                                                                                                                                                                                                                                   |                |
| 50 |                                        |           |                                                                                                                                                                                                                                                                                                                                                                                                                                                   |                |
| 51 |                                        |           |                                                                                                                                                                                                                                                                                                                                                                                                                                                   |                |
| 52 |                                        |           |                                                                                                                                                                                                                                                                                                                                                                                                                                                   |                |
| 53 |                                        |           |                                                                                                                                                                                                                                                                                                                                                                                                                                                   |                |
| 54 |                                        |           |                                                                                                                                                                                                                                                                                                                                                                                                                                                   |                |
| 55 |                                        |           |                                                                                                                                                                                                                                                                                                                                                                                                                                                   |                |
| 56 |                                        |           |                                                                                                                                                                                                                                                                                                                                                                                                                                                   |                |
| 57 |                                        |           |                                                                                                                                                                                                                                                                                                                                                                                                                                                   |                |
| 58 |                                        |           |                                                                                                                                                                                                                                                                                                                                                                                                                                                   |                |
| 59 |                                        |           |                                                                                                                                                                                                                                                                                                                                                                                                                                                   |                |
| 60 |                                        |           |                                                                                                                                                                                                                                                                                                                                                                                                                                                   |                |

## RESULTS†

|                                          |           |                                                                                                                                                                                                                                                                                                                                                                                                                                                              |                                      |
|------------------------------------------|-----------|--------------------------------------------------------------------------------------------------------------------------------------------------------------------------------------------------------------------------------------------------------------------------------------------------------------------------------------------------------------------------------------------------------------------------------------------------------------|--------------------------------------|
| Study selection                          | 17        | Give numbers of studies screened, assessed for eligibility, and included in the review, with reasons for exclusions at each stage, ideally with a flow diagram.                                                                                                                                                                                                                                                                                              | Page 9 & Fig 1                       |
| <b>Presentation of network structure</b> | <b>S3</b> | Provide a network graph of the included studies to enable visualization of the geometry of the treatment network.                                                                                                                                                                                                                                                                                                                                            | Fig 2                                |
| <b>Summary of network geometry</b>       | <b>S4</b> | Provide a brief overview of characteristics of the treatment network. This may include commentary on the abundance of trials and randomized patients for the different interventions and pairwise comparisons in the network, gaps of evidence in the treatment network, and potential biases reflected by the network structure.                                                                                                                            | Page 9                               |
| Study characteristics                    | 18        | For each study, present characteristics for which data were extracted (e.g., study size, PICOS, follow-up period) and provide the citations.                                                                                                                                                                                                                                                                                                                 | Page 10 & Appendix table 2           |
| Risk of bias within studies              | 19        | Present data on risk of bias of each study and, if available, any outcome level assessment.                                                                                                                                                                                                                                                                                                                                                                  | Page 10 & Appendix table 3           |
| Results of individual studies            | 20        | For all outcomes considered (benefits or harms), present, for each study: 1) simple summary data for each intervention group, and 2) effect estimates and confidence intervals. <i>Modified approaches may be needed to deal with information from larger networks.</i>                                                                                                                                                                                      | Page 10-11 & Appendix table 2        |
| Synthesis of results                     | 21        | Present results of each meta-analysis done, including confidence/credible intervals. <i>In larger networks, authors may focus on comparisons versus a particular comparator (e.g. placebo or standard care), with full findings presented in an appendix. League tables and forest plots may be considered to summarize pairwise comparisons.</i> If additional summary measures were explored (such as treatment rankings), these should also be presented. | Page 10-11 & Table 2                 |
| <b>Exploration for inconsistency</b>     | <b>S5</b> | Describe results from investigations of inconsistency. This may include such information as measures of model fit to compare consistency and inconsistency models, <i>P</i> values from statistical tests, or summary of inconsistency estimates from different parts of the treatment network.                                                                                                                                                              | Page 11 & Fig 4                      |
| Risk of bias across studies              | 22        | Present results of any assessment of risk of bias across studies for the evidence base being studied.                                                                                                                                                                                                                                                                                                                                                        | Page 11 & Fig 4                      |
| Results of additional analyses           | 23        | Give results of additional analyses, if done (e.g., sensitivity or subgroup analyses, meta-regression analyses, <i>alternative network geometries studied, alternative choice of prior distributions for Bayesian analyses, and so forth</i> ).                                                                                                                                                                                                              | Page 11<br>Table 4<br>Fig 4<br>Fig 5 |

**DISCUSSION**

|    |                     |    |                                                                                                                                                                                                                                                                                                                                                                                                                                |
|----|---------------------|----|--------------------------------------------------------------------------------------------------------------------------------------------------------------------------------------------------------------------------------------------------------------------------------------------------------------------------------------------------------------------------------------------------------------------------------|
| 1  |                     |    |                                                                                                                                                                                                                                                                                                                                                                                                                                |
| 2  | Summary of evidence | 24 | Summarize the main findings, including the strength of evidence for each main outcome; consider their relevance to key groups (e.g., healthcare providers, users, and policy-makers).                                                                                                                                                                                                                                          |
| 3  |                     |    |                                                                                                                                                                                                                                                                                                                                                                                                                                |
| 4  |                     |    |                                                                                                                                                                                                                                                                                                                                                                                                                                |
| 5  |                     |    |                                                                                                                                                                                                                                                                                                                                                                                                                                |
| 6  | Limitations         | 25 | Discuss limitations at study and outcome level (e.g., risk of bias), and at review level (e.g., incomplete retrieval of identified research, reporting bias). <i>Comment on the validity of the assumptions, such as transitivity and consistency. Comment on any concerns regarding network geometry (e.g., avoidance of certain comparisons).</i>                                                                            |
| 7  |                     |    |                                                                                                                                                                                                                                                                                                                                                                                                                                |
| 8  |                     |    |                                                                                                                                                                                                                                                                                                                                                                                                                                |
| 9  |                     |    |                                                                                                                                                                                                                                                                                                                                                                                                                                |
| 10 |                     |    |                                                                                                                                                                                                                                                                                                                                                                                                                                |
| 11 |                     |    |                                                                                                                                                                                                                                                                                                                                                                                                                                |
| 12 |                     |    |                                                                                                                                                                                                                                                                                                                                                                                                                                |
| 13 | Conclusions         | 26 | Provide a general interpretation of the results in the context of other evidence, and implications for future research.                                                                                                                                                                                                                                                                                                        |
| 14 |                     |    |                                                                                                                                                                                                                                                                                                                                                                                                                                |
| 15 |                     |    |                                                                                                                                                                                                                                                                                                                                                                                                                                |
| 16 |                     |    |                                                                                                                                                                                                                                                                                                                                                                                                                                |
| 17 |                     |    |                                                                                                                                                                                                                                                                                                                                                                                                                                |
| 18 | <b>FUNDING</b>      |    |                                                                                                                                                                                                                                                                                                                                                                                                                                |
| 19 | Funding             | 27 | Describe sources of funding for the systematic review and other support (e.g., supply of data); role of funders for the systematic review. This should also include information regarding whether funding has been received from manufacturers of treatments in the network and/or whether some of the authors are content experts with professional conflicts of interest that could affect use of treatments in the network. |
| 20 |                     |    |                                                                                                                                                                                                                                                                                                                                                                                                                                |
| 21 |                     |    |                                                                                                                                                                                                                                                                                                                                                                                                                                |
| 22 |                     |    |                                                                                                                                                                                                                                                                                                                                                                                                                                |
| 23 |                     |    |                                                                                                                                                                                                                                                                                                                                                                                                                                |
| 24 |                     |    |                                                                                                                                                                                                                                                                                                                                                                                                                                |
| 25 |                     |    |                                                                                                                                                                                                                                                                                                                                                                                                                                |
| 26 |                     |    |                                                                                                                                                                                                                                                                                                                                                                                                                                |
| 27 |                     |    |                                                                                                                                                                                                                                                                                                                                                                                                                                |
| 28 |                     |    |                                                                                                                                                                                                                                                                                                                                                                                                                                |

PICOS = population, intervention, comparators, outcomes, study design.

\* Text in italics indicates wording specific to reporting of network meta-analyses that has been added to guidance from the PRISMA statement.

† Authors may wish to plan for use of appendices to present all relevant information in full detail for items in this section.

# BMJ Open

## Effects of Five Types of Selenium Supplementation for Treatment of Kashin-Beck disease in children: A Systematic Review and Network Meta-analysis

|                                 |                                                                                                                                                                                                                                                                                                                                                                                                                                                                                                                                                                                                                                     |
|---------------------------------|-------------------------------------------------------------------------------------------------------------------------------------------------------------------------------------------------------------------------------------------------------------------------------------------------------------------------------------------------------------------------------------------------------------------------------------------------------------------------------------------------------------------------------------------------------------------------------------------------------------------------------------|
| Journal:                        | <i>BMJ Open</i>                                                                                                                                                                                                                                                                                                                                                                                                                                                                                                                                                                                                                     |
| Manuscript ID                   | bmjopen-2017-017883.R3                                                                                                                                                                                                                                                                                                                                                                                                                                                                                                                                                                                                              |
| Article Type:                   | Research                                                                                                                                                                                                                                                                                                                                                                                                                                                                                                                                                                                                                            |
| Date Submitted by the Author:   | 19-Dec-2017                                                                                                                                                                                                                                                                                                                                                                                                                                                                                                                                                                                                                         |
| Complete List of Authors:       | Xie, Dongmei; West China Hospital, Sichuan University, Department of Geriatrics<br>Liao, Yulin; West China Hospital, Sichuan University, Department of Geriatrics<br>Yue, Jirong; West China Hospital, Sichuan University, Department of Geriatrics<br>Zhang, Chao; Taihe Hospital, Hubei University of Medicine, Center for Evidence-based Medicine and Clinical Research<br>Wang, Yanyan; West China Hospital, Sichuan University, Department of Geriatrics<br>Deng, Chuanyao; West China Hospital, Sichuan University, Department of Geriatrics<br>Chen, Ling; West China Hospital, Sichuan University, Department of Geriatrics |
| <b>Primary Subject Heading</b>: | Evidence based practice                                                                                                                                                                                                                                                                                                                                                                                                                                                                                                                                                                                                             |
| Secondary Subject Heading:      | Complementary medicine, Evidence based practice, Medical management, Nutrition and metabolism                                                                                                                                                                                                                                                                                                                                                                                                                                                                                                                                       |
| Keywords:                       | Kashin-Beck disease, Selenium supplementation, Network meta-analysis, Randomized controlled trial                                                                                                                                                                                                                                                                                                                                                                                                                                                                                                                                   |
|                                 |                                                                                                                                                                                                                                                                                                                                                                                                                                                                                                                                                                                                                                     |

SCHOLARONE™  
Manuscripts

1  
2  
3  
4 **Effects of Five Types of Selenium Supplementation for Treatment**  
5 **of Kashin-Beck disease in children: A Systematic Review and**  
6 **Network Meta-analysis**  
7  
8  
9

10 **Running title: Selenium Supplementation for Treatment of KBD**

11 Dongmei Xie, Yulin Liao, Jirong Yue, Chao Zhang, Yanyan Wang, Chuanyao Deng, Ling  
12 Chen  
13  
14  
15

16  
17 **Dongmei Xie BS<sup>a</sup>**

18 Department of Geriatrics, West China Hospital, Sichuan University  
19 No. 37, Guo Xue Xiang, Chengdu, Sichuan, CHINA  
20  
21  
22

23  
24 **Yulin Liao MD<sup>a</sup>**

25 Department of Geriatrics, West China Hospital, Sichuan University  
26 No. 37, Guo Xue Xiang, Chengdu, Sichuan, CHINA  
27  
28  
29

30 **Jirong Yue, MD (corresponding author)<sup>b</sup>**

31 Department of Geriatrics, West China Hospital, Sichuan University  
32 No. 37, Guo Xue Xiang, Chengdu, Sichuan, CHINA  
33  
34  
35

36 Email: [yuejirong11@hotmail.com](mailto:yuejirong11@hotmail.com)  
37  
38  
39

40 **Chao Zhang, MD<sup>b</sup>**

41 Center for Evidence-Based Medicine and Clinical Research, Taihe Hospital  
42 Hubei University of Medicine, Shiyan 442000, Hubei Province, China  
43  
44  
45  
46  
47  
48  
49  
50  
51  
52  
53  
54  
55  
56  
57  
58  
59  
60

51 **Yanyan Wang PHD**

52 Department of Geriatrics, West China Hospital, Sichuan University  
53 No. 37, Guo Xue Xiang, Chengdu, Sichuan, CHINA  
54  
55  
56  
57  
58  
59  
60

1  
2  
3  
4  
5  
6 **Chuanyao Deng BS**

7 Department of Geriatrics, West China Hospital, Sichuan University  
8 No. 37, Guo Xue Xiang, Chengdu, Sichuan, CHINA  
9

10  
11  
12  
13 **Ling Chen BS**

14 Department of Geriatrics, West China Hospital, Sichuan University  
15 No. 37, Guo Xue Xiang, Chengdu, Sichuan, CHINA  
16

17  
18  
19 <sup>a</sup> Dongmei Xie and Yulin Liao contributed equally to this article.  
20

21 <sup>b</sup> Jirong Yue and Chao Zhang contributed equally to this article  
22  
23  
24  
25  
26  
27  
28  
29  
30  
31  
32  
33  
34  
35  
36  
37  
38  
39  
40  
41  
42  
43  
44  
45  
46  
47  
48  
49  
50  
51  
52  
53  
54  
55  
56  
57  
58  
59  
60



## Abstract

**Objective:** To compare the effectiveness of five kinds of selenium supplementation for the treatment of patients with Kashin-Beck disease (KBD), and rank these selenium supplementation based on their performance.

**Design:** We searched for all publications between January 1, 1966 and March 31, 2017 using seven electronic databases. GRADE system to NMAs was applied to rate the quality of the evidence. We conducted a random effects model network meta-analysis in STATA to determine comparative effectiveness of each intervention. Rankings were obtained by using the surface under the cumulative ranking curve (SUCRA) values and mean ranks.

**Results:** A total of 15 randomized controlled trials involving 2931 patients were included. After assessment of the overall quality of the evidence, we downgraded our primary outcomes from high to low or very low quality. Network meta-analyses showed that all five kinds of selenium supplementation had higher metaphysis X-ray improvement which were superior to placebo. Ranking on efficacy indicated that selenium salt was ranked the highest, followed by sodium selenite + vitamin E, selenium enriched yeast, sodium selenite and then sodium selenite + vitamin C.

**Conclusions:** Based on the results of network meta-analysis, all five types of selenium supplements are more effective than placebo and so that selenium supplementation is of help in repairing metaphyseal lesions. Since the overall quality of the evidence was low or very low, the SUCRA values may be misleading and should be considered jointly with the GRADE confidence in the estimates for each comparison. The quality of the evidence is insufficient to draw a conclusion about what method of selenium supplementation is most effective.

**Trial registration number:** CRD42016051874

**Keywords:** Kashin-Beck disease; Selenium supplementation; Network meta-analysis; Randomized controlled trial

**Strengths of this study:**

- The present NMA integrated evidence from direct and indirect comparisons. We applied GRADE system to NMAs based GRADE working group to rate the quality of the evidence.
- We comprehensively summarized all RCTs of selenium supplements for KBD.

**Potential limitations:**

- Despite our exhaustive search, only 15 RCTs conducted in China were included in this review. Some trials may have been published in local journals that were missed in our search.
- The overall quality of the evidence was low or very low. The SUCRA values may be misleading and should be considered jointly with the GRADE confidence in the estimates for each comparison.

## Introduction

Kashin-Beck disease (KBD) is a chronic, disabling degenerative disease of the peripheral joints and spine<sup>1,2</sup>. It is present primarily among people in southeast Siberia, north Korea, and China<sup>3</sup>. KBD is prevalent in 377 counties of 14 provinces in China, with 0.64 million cases<sup>4</sup>. KBD occurs in childhood and involves pathologic changes of metaphysis and epiphyseal plate, resulting in multiple symptoms in the growth and the articular cartilages such as bony deformity, joints enlargement, growth retardation and functional impairment in multiple joints. The resulting disability causes an important human and social economic burden to both affected children and adults. Moreover, KBD can also cause disturbances in the cartilage metabolism, the lipid peroxidation, and sulfur and selenium metabolism<sup>5,6</sup>. So far, some measures exist for treatment of KBD because of the incomplete ability of the cartilage to repair itself. Treatment strategies for symptomatic relief include non-steroidal anti-inflammatory drugs<sup>7</sup>, sodium hyaluronate<sup>8</sup>, physical therapy<sup>9</sup> and chondroitin sulfate combined with glucosamine<sup>10</sup>. Successful surgical treatments to correct joint defects have been reported by orthopaedists<sup>11,12</sup>.

Although the etiology of KBD is multifactorial, one of the major environmental risk factors is selenium deficiency<sup>13</sup>. Since the 1970s, selenium supplements have been given in some highly endemic areas. A meta-analysis including five randomized control trials (RCTs) and 10 non-RCTs demonstrated the benefits of selenium supplementation for the primary prevention of KBD in children<sup>14</sup>. Another systematic review suggested that sodium selenite (Se) was effective for the treatment of patients already affected with KBD<sup>15</sup>. Besides Se tablet, there are other selenium supplements used for treating KBD, including selenium salts (Se salt), selenium enriched yeast (Se yeast), the combination of sodium selenite with vitamin E (Se + VE), and the combination of sodium selenite with vitamin C (Se + VC). At the time of

our review, there were few head-to-head comparisons of different types of selenium supplementation for treatment of KBD. In light of the need for government policy makers and clinical care workers to know the effects of a set of alternative options, we conducted a systematic review and network meta-analysis (NMA). The aim of this systematic review and NMA was to compare the effectiveness of all types of selenium supplementation for the treatment of patients with KBD, and rank these selenium supplementation based on their performance.

## Method

A protocol for this systematic review was devised in accordance with the PRISMA guidelines and registered on PROSPERO, and the trial registration number was CRD42016051874.

### *Search strategy*

We searched, without language restrictions, for all publications between January 1, 1966 and March 31, 2017 using electronic databases, which included MEDLINE, EMBASE, The Cochrane Central Register of Controlled Trials, The Cochrane Database of Systematic Reviews, The Chinese Biomedical Database, Chinese National Knowledge Infrastructure, Chinese Science and Technique Journals Database, and Wan Fang database. The following MeSH words and free words were used: “Kashin-Beck disease,” “Kashin-Beck disease,” “big bone disease,” “endemic osteoarthritis,” “Urov disease” and “selenium,” “Sodium selenite,” and “Se”. The Ovid search strategy is available in Appendix box 1. Reference lists from published narrative review articles and systematic reviews were reviewed to identify additional studies.

### *Eligibility criteria*

We included all randomized, controlled trials (RCTs) that used Se tablet and other types of selenium supplements including Se salt, Se yeast, Se + VE, as well as Se + VC for KBD

1  
2  
3  
4 patients. The control groups included placebo or no treatment controls, or other active medi-  
5  
6 cines. The diagnostic criteria used for KBD was based on the Diagnosis Criteria for Kashin-  
7  
8 Beck Disease (GB16003-1995), which was developed by National Health and Family Plan-  
9  
10 ning Commission of the People's Republic of China<sup>16</sup>. We excluded the following studies: (1)  
11  
12 studies with small sample sizes (numbers of patients less than 20 in each treatment group);  
13  
14 (2) preventive studies; (3) studies without available information of interest. Studies reporting  
15  
16 mixed groups of participants (e.g., participants with and without KBD) were included only if  
17  
18 the therapeutic effect data could be identified and extracted separately. Outcome of interest to  
19  
20 this review was the repair rate of metaphyseal lesions on X-ray film. Typically, repair was  
21  
22 defined as being cured basically or improved significantly of metaphyseal lesions according  
23  
24 to the latest judgment standard of X-ray for treatment effect of KBD<sup>17</sup>.

### 25 26 27 28 ***Data extraction and quality evaluation***

29  
30 Two authors (Y. L & D. X) independently screened all citations identified by the searches.  
31  
32 Full-text articles of potential studies were obtained and assessed according to the aforemen-  
33  
34 tioned inclusion criteria. The data extraction form included publication (first author, year of  
35  
36 publication), demographics (sample size and age), interventions (dosage, route of administra-  
37  
38 tion, and duration of treatment), the follow-up period, as well as outcomes. We extracted data  
39  
40 to the nearest 12 months to estimate the overall odds ratio (OR) because all the included  
41  
42 RCTs report this time point. Two reviewers independently evaluated the methodological qual-  
43  
44 ity of individual study according the Cochrane risk-of-bias tool<sup>18</sup>. In our review, we applied  
45  
46 the GRADE system to our NMA based on the GRADE working group<sup>19</sup>. The methods of rat-  
47  
48 ing the quality of direct comparison are the same for GRADE in traditional meta-analysis.  
49  
50 We downgraded the evidence from “high quality” by one level for serious (or by two for very  
51  
52 serious) study limitations (risk of bias), indirectness of evidence, inconsistency, imprecision  
53  
54  
55  
56  
57  
58  
59  
60

1  
2  
3  
4 of effect estimates or potential publication bias. The rating of the quality of the indirect esti-  
5 mates is based on the ratings of the two pair-wise estimates that contributes to the indirect  
6 estimate of the comparison of interest. The lower confidence rating of the two direct compar-  
7 isons constitutes the confidence rating of the indirect comparison. When both direct and indi-  
8 rect evidence are available, we used the higher of the two quality ratings as the quality rating  
9 for the NMA estimate. In addition, we needed to consider the intransitivity among different  
10 groups and the inconsistency between direct comparison and indirect comparison. Further-  
11 more, we used the GRADE profiler to help us create "Summary of findings" tables, and re-  
12 ported outcomes in this tables. Any disagreements would be resolved by consulting a third  
13 author (J.Y).

### 24 ***Statistical analysis***

25  
26  
27  
28 As the repair rate of metaphyseal lesions on X-ray film, the outcome of interest in this  
29 text, was a discontinuous statistics, we calculated the OR and its 95% confidence intervals  
30 (CI) as the effect estimates. The reason why OR were used instead of Risk Ratios (RR) was  
31 following: the inferential fallacies with use of RR in indirect comparison provide scope for  
32 abuse with respect to choice in framing of outcomes, and confound decision making where  
33 both results are presented. The use of ORs overcomes this inferential fallacy, consistently in-  
34 forming inference with respect to direction of treatment effect in indirect comparisons. Ini-  
35 tially, we performed standard pair-wise meta-analyses for all available direct comparisons  
36 using a random effects model in Revman 5.3. Statistical heterogeneity of treatment effects  
37 across studies was assessed by the Cochrane Q test, and the extent of between-study hetero-  
38 geneity was quantified by  $I^2$ , of which with a value greater than 50% indicates substantial  
39 heterogeneity. Then we conducted a random effects model network meta-analysis in STATA  
40 to determine comparative effectiveness of each intervention by using the network command  
41  
42  
43  
44  
45  
46  
47  
48  
49  
50  
51  
52  
53  
54  
55  
56  
57  
58  
59  
60

1  
2  
3  
4 and self-programmed STATA routines available at <http://www.mtm.uoi.gr>. We present the  
5  
6 mean effect sizes for the network estimates (OR) along with their 95% confidence intervals  
7  
8 (CI) and prediction intervals (PrI). The PrI shows the predicted parameter around estimated  
9  
10 treatment effects in the future study.

11  
12  
13 To evaluate consistency in the entire network, we used the ‘design-by-treatment’ model,  
14  
15 which was described by Higgins and colleagues, by using the network meta command in  
16  
17 STATA. This method accounts for different source of inconsistency that can occur when stud-  
18  
19 ies with different designs (two-arm trials vs. three-arm trials) give different results as well as  
20  
21 disagreement between direct and indirect evidence. We inferred about the presence of incon-  
22  
23 sistency from any source in the entire network based on a chi-squared test, and a P value  
24  
25 greater than 0.05 indicated that the direct and indirect comparisons in the network were con-  
26  
27 sistent.  
28  
29

30 We also estimated the ranking probabilities for all treatments of being at each possible  
31  
32 rank. Rankings were obtained by using the surface under the cumulative ranking curve (SU-  
33  
34 CRA) values and mean ranks. SUCRA could be expressed as a percentage interpreted as the  
35  
36 percentage of effectiveness of a treatment that would be ranked first without uncertainty. To  
37  
38 derive these SUCRA values we used the ranking probabilities estimated from the mvmeta  
39  
40 command.  
41  
42

## 43 **Results**

### 44 ***Study inclusion and characteristics***

45  
46  
47 Initial searches yielded 1686 citations. Of these, 1645 duplicate or irrelevant records were  
48  
49 excluded and full-text articles of the remaining 41 studies were retrieved for further assess-  
50  
51 ment according to the inclusion criteria. A total of 15 studies<sup>20-34</sup> containing 2931 patient were  
52  
53 included eventually in our meta-analysis (Fig 1). We excluded 26 trials for the reasons docu-  
54  
55  
56  
57  
58  
59  
60

mented in the Characteristics of excluded studies table (Appendix Table 1).

A total of seven interventions were evaluated: Se, Se salt, Se yeast, Se + VE, Se + VC, VC, and placebo. Figure 2 shows the network of all treatment comparisons included in this review. The age of participants range from 2 to 16 years old and the duration of follow-up varied from 6 months to 36 months. The main characteristics of the included studies were similar, and the characteristics (e.g. interventions dosage, route of administration, duration of treatment, the follow-up period, and outcomes) are presented in the online supplementary Appendix Table 2.

### ***Overall assessment for evidence quality***

All included trials were reported to be RCTs. The quality of included studies was overall low. Study quality for each study can be seen in Appendix Table 3. We downgraded this outcome from high to low or very low quality for possible bias, inconsistency, or imprecision. Overall assessment for evidence quality was seen in Table 1.

**Table 1 Quality ratings for comparison of different interventions**

| Comparison           | Quality of direct evidence | Quality of indirect evidence | Quality of network meta-analysis evidence |
|----------------------|----------------------------|------------------------------|-------------------------------------------|
| Se vs. placebo       | Low*,†                     | Low*,#                       | Low*,†                                    |
| Se salt vs. placebo  | Low*,†                     | Low*,#,                      | Low*,†                                    |
| Se+VC vs. placebo    | Moderate*                  | Low*,#                       | Moderate*                                 |
| Se+VE vs. placebo    | Very low*,†,‡              | Low*,#                       | Low*,#                                    |
| Se yeast vs. placebo | Moderate*                  | Low*,#                       | Moderate*                                 |
| VC vs. placebo       | Moderate*                  | Low*,#                       | Moderate*                                 |
| Se salt vs. Se       | —                          | Very low*,‡,¶                | Very low*,‡,¶                             |
| Se+VC vs. Se         | Moderate*                  | Low*,‡                       | Moderate*                                 |
| Se+VE vs. Se         | —                          | Very low*,‡,¶                | Very low*,‡,¶                             |
| Se yeast vs. Se      | Moderate*                  | Very low*,‡,¶                | Moderate*                                 |
| VC vs. Se            | Moderate*                  | Low*,¶                       | Moderate*                                 |
| Se+VC vs. Se salt    | Low*,‡                     | Low*,¶                       | Low*,¶                                    |



|                      |           |                  |                  |
|----------------------|-----------|------------------|------------------|
| Se+VE vs. Se salt    | —         | Very low*,‡,¶,¶¶ | Very low*,‡,¶,¶¶ |
| Se yeast vs. Se salt | —         | Very low*,‡,¶,¶¶ | Very low*,‡,¶,¶¶ |
| VC vs. Se salt       | Low*,‡    | Very low*,‡,¶,¶¶ | Low*,¶           |
| Se+VE vs. Se+VC      | —         | Very low*,‡,¶,¶¶ | Very low*,‡,¶,¶¶ |
| Se yeast vs. Se+VC   | —         | Very low*,‡,¶,¶¶ | Very low*,‡,¶,¶¶ |
| VC vs. Se+VC         | Moderate* | Very low*,‡,¶,¶¶ | Moderate*        |
| Se yeast vs. Se+VE   | —         | Very low*,‡,¶,¶¶ | Very low*,‡,¶,¶¶ |
| VC vs. Se+VE         | —         | Very low*,‡,¶,¶¶ | Very low*,‡,¶,¶¶ |
| VC vs. Se yeast      | —         | Very low*,‡,¶,¶¶ | Very low*,‡,¶,¶¶ |

\*Limitations (risk of bias). †Inconsistency. ‡Imprecision. #Inconsistency for indirect evidence: prediction intervals for treatment effect include effects that would have different interpretations. ¶Indirectness: no convincing evidence for the plausibility of the transitivity assumption. Se = Sodium selenite, Se salt = selenium salt, VC = vitamin C, Se + VC = the combination of sodium selenite with vitamin C ; Se + VE = the combination of sodium selenite with vitamin E, Se yeast = selenium enriched yeast

### *Intervention-control pair-wise meta-analyses*

All RCTs reported repair rate of metaphyseal lesions on X-ray films. The individual study data used in the analyses were listed in appendix Table 4. Follow-up duration of included RCTs were varied. We extracted data to the nearest 12 months to estimate the overall OR. When compared to placebo, the pooled OR (random effects model) of X-ray improvement was in favor of Se (OR 5.0, 95% CI: 3.21 - 7.78,  $P < 0.001$ ,  $I^2 = 70\%$ ), Se salt (OR 7.6, 95% CI: 2.34 - 24.67,  $P = 0.001$ ), Se enriched yeast (OR 3.75, 95% CI: 1.76 - 8.02,  $P = 0.001$ ), and Se + VE (OR 11.05, 95% CI: 2.61 - 46.80,  $P = 0.03$ ,  $I^2 = 60\%$ ) respectively, which indicated that repairing rate of metaphyseal lesions on X-ray films was significantly higher for these drugs than placebo (See Appendix figure) . Summary of findings for each selenium supplements compare to placebo was seen in Table 2. A few RCTs reported direct comparisons among active interventions. There were two RCTs compared Se with VC, the pooled OR of two RCTs also showed no significant difference existed (OR 1.15, 95% CI: 0.51 – 2.63,

1  
2  
3  
4 P=0.93,  $I^2 = 0\%$ )<sup>23,33</sup>. There was only one RCT for Se vs. Se yeast<sup>26</sup>, Se vs. Se +VC<sup>31</sup>, Se salt  
5  
6 vs. Se + VC<sup>31</sup>, Se salt vs. VC<sup>31</sup>, respectively. OR of X-ray improvement was significantly  
7  
8 higher in Se salt group compared with Se + VC (OR 6.00, 95% CI: 1.81 - 19.93, P=0.003)  
9  
10 and VC alone (OR 4.24, 95% CI: 1.39 - 12.90, P=0.011). There were no significant differ-  
11  
12 ences noted in other active interventions comparisons (See Table 3).  
13  
14  
15  
16  
17  
18  
19  
20  
21  
22  
23  
24  
25  
26  
27  
28  
29  
30  
31  
32  
33  
34  
35  
36  
37  
38  
39  
40  
41  
42  
43  
44  
45  
46  
47  
48  
49  
50  
51  
52  
53  
54  
55  
56  
57  
58  
59  
60

Table 2 Summary of findings for each intervention in comparison to placebo

| <b>Patient or population:</b> Children with Kashin-Beck disease<br><b>Outcomes:</b> Improvement of metaphyseal lesions on X-ray<br><b>Intervention:</b> Se, Se salt, Se yeast, Se + VE, Se + VC, VC<br><b>Comparison:</b> placebo |                                           |                                 |                                                                          |       |                                                                 |                                                                              |
|-----------------------------------------------------------------------------------------------------------------------------------------------------------------------------------------------------------------------------------|-------------------------------------------|---------------------------------|--------------------------------------------------------------------------|-------|-----------------------------------------------------------------|------------------------------------------------------------------------------|
| Intervention/<br>Comparison:                                                                                                                                                                                                      | Anticipated absolute effects*<br>(95% CI) |                                 | Relative effect<br>(95% CI)<br>(based on net-<br>work meta-<br>analysis) | SUCRA | No of partic-<br>ipants<br>(studies<br>with direct<br>evidence) | Quality of the<br>evidence based<br>on network me-<br>ta-analysis<br>(GRADE) |
|                                                                                                                                                                                                                                   | Repair rate<br>with placebo               | Repair rate<br>with Se          |                                                                          |       |                                                                 |                                                                              |
| Se salt vs.<br>placebo                                                                                                                                                                                                            | 34 per 100                                | <b>87 per 100</b><br>(60 to 97) | <b>OR 12.37</b><br>(2.81 to 54.41)                                       | 86.0% | 59<br>(1 RCT)                                                   | ⊕⊕○○<br>LOW <sup>a,c</sup>                                                   |
| Se+VE vs.<br>placebo                                                                                                                                                                                                              | 45 per 100                                | <b>90 per 100</b><br>(72 to 97) | <b>OR 10.72</b><br>(3.14 to 36.57)                                       | 82.8% | 145<br>(2 RCTs)                                                 | ⊕⊕○○<br>LOW <sup>a,c</sup>                                                   |
| Se yeast vs.<br>placebo                                                                                                                                                                                                           | 38 per 100                                | <b>78 per 100</b><br>(51 to 93) | <b>OR 5.81</b><br>(1.70 to 19.89)                                        | 62.5% | 120<br>(1 RCT)                                                  | ⊕⊕⊕○<br>MODERATE <sup>a</sup>                                                |
| Se vs. placebo                                                                                                                                                                                                                    | 42 per 100                                | <b>77 per 100</b><br>(69 to 84) | <b>OR 4.68</b><br>(2.99 to 7.34)                                         | 52.5% | 2427<br>(11 RCTs)                                               | ⊕⊕○○<br>LOW <sup>a,b</sup>                                                   |
| Se+VC vs.<br>placebo                                                                                                                                                                                                              | 34 per 100                                | <b>63 per 100</b><br>(38 to 83) | <b>OR 3.26</b><br>(1.14 to 9.28)                                         | 35.7% | 54<br>(1 RCT)                                                   | ⊕⊕⊕○<br>MODERATE <sup>a</sup>                                                |
| VC vs. place-<br>bo                                                                                                                                                                                                               | 34 per 100                                | <b>61 per 100</b><br>(40 to 79) | <b>OR 3.05</b><br>(1.29 to 7.20)                                         | 30.1% | 124<br>(2 RCTs)                                                 | ⊕⊕⊕○<br>MODERATE <sup>a</sup>                                                |

\*The repair rate in the intervention group (and its 95% confidence interval) is based on the assumed rate in the comparison group and the relative effect of the intervention (and its 95% CI).

CI: Confidence interval; OR: Odds ratio

#### GRADE Working Group grades of evidence

**High quality:** We are very confident that the true effect lies close to that of the estimate of the effect

**Moderate quality:** We are moderately confident in the effect estimate: The true effect is likely to be close to the estimate of the effect, but there is a possibility that it is substantially different

**Low quality:** Our confidence in the effect estimate is limited: The true effect may be substantially different from the estimate of the effect

**Very low quality:** We have very little confidence in the effect estimate: The true effect is likely to be substantially different from the estimate of effect

a. Limitations (risk of bias): no studies described adequate methods regarding the sequence of randomization and reported allocation concealment. Some studies did not use of a blinding method and ITT analysis.

b. Inconsistency: small sample size or have a higher I<sup>2</sup>, or both.

c. Imprecision: the effects are large but the overall sample size are low.

Se = Sodium selenite, Se salt = selenium salt, VC = vitamin C, Se + VC = the combination of sodium selenite with vitamin C ;

Se + VE = the combination of sodium selenite with vitamin E, Se yeast = selenium enriched yeast

**Table 3 Results of pair-wise and network meta-analyses of repairing rate of metaphyseal lesions on X-ray films**

| <b>OR<br/>(95%CI) #</b> | <b>Placebo</b>                                  | <b>Se</b>                                  | <b>Se salt</b>                             | <b>Se + VC</b>                             | <b>Se + VE</b>      | <b>Se yeast</b>    |
|-------------------------|-------------------------------------------------|--------------------------------------------|--------------------------------------------|--------------------------------------------|---------------------|--------------------|
| <b>Se</b>               | 4.68 (2.99 to 7.34)*<br>5.00 (3.21 to 7.78)     | -                                          | -                                          | -                                          | -                   | -                  |
| <b>Se salt</b>          | 12.37 (2.81 to 54.41)*<br>7.60 (2.34 to 24.67)  | 2.64 (0.59 to 11.84)                       | -                                          | -                                          | -                   | -                  |
| <b>Se + VC</b>          | 3.26 (1.14 to 9.28)*<br>1.27 (0.42 to 3.83)     | 0.70 (0.25 to 1.97)<br>1.30 (0.57 to 2.94) | 0.26 (0.06 to 1.20)<br>0.17 (0.05 to 0.55) | -                                          | -                   | -                  |
| <b>Se + VE</b>          | 10.72 (3.14 to 36.57)*<br>11.05 (2.61 to 46.80) | 2.29 (0.62 to 8.43)                        | 0.87 (0.13 to 5.93)                        | 3.29 (0.65 to 16.53)                       | -                   | -                  |
| <b>Se yeast</b>         | 5.81 (1.70 to 19.89)*<br>3.75 (1.76 to 8.02)    | 1.24 (0.36 to 4.25)<br>1.92 (0.90 to 4.00) | 0.47 (0.07 to 3.16)                        | 1.78 (0.37 to 8.66)                        | 0.54 (0.10 to 3.08) | -                  |
| <b>VC</b>               | 3.05 (1.29 to 7.20)*<br>2.02 (0.98 to 4.17)     | 0.65 (0.28 to 1.53)<br>0.95 (0.51 to 1.79) | 0.25 (0.06 to 1.06)<br>0.24 (0.08 to 0.72) | 0.94 (0.34 to 2.56)<br>0.87 (0.38 to 1.96) | 0.28 (0.06 to 1.27) | 0.52(0.12 to 2.27) |

# ORs represent odds of repair in row-treatment versus column-treatment. ORs larger than 1 denote higher repair rate in row-treatment than column-treatment. In each cell, the first line represents the result of network meta-analyses, and the second row represents the result of pair-wise meta-analyses. OR = Odds ratio, CI = Confidence intervals, Se = Sodium selenite, Se salt = selenium salt, VC = vitamin C, Se + VC = the combination of sodium selenite with vitamin C ; Se + VE = the combination of sodium selenite with vitamin E, Se yeast = selenium enriched yeast

### ***Results of network meta-analyses and consistency test***

The pooled OR and 95% CI of X-ray improvement for active treatment compared with placebo was 4.68 (2.99 to 7.34) for Se, 12.37 (2.81 to 54.41) for Se salt, 5.81 (1.70 to 19.89) for Se enriched yeast, 10.72 (3.14 to 36.57) for Se + VE, and 3.26 (1.14 to 9.28) for Se + VC respectively, which indicated a significant difference in efficacy. For the comparison between active treatments, no significant differences were found. More details were presented in Table 3. In Figure 3, we presented the OR for the network estimates along with 95% CI and PrI.

There was no inconsistency between direct and indirect evidences according to the design-by-treatment interaction model ( $P=0.88$ ), implying that direct and indirect evidence were mainly consistent (Fig 4). However, the results of the comparison of Se + VC and VC versus placebo showed some degree of inconsistency. Actually, the lower CI for X-ray improvement were nearly equal to 1 (1.13 for Se + VC and 1.27 for VC), showing a trend to coincide with direct results.

Table 2 and Fig 5 displayed the distribution of probabilities for each treatment being ranked for their efficacy in KBD according the SUCRA values.

## **Discussion**

### ***Principal findings***

Our network meta-analysis of all 15 available RCTs in 2931 patients with KBD showed that all five kinds of selenium supplementation (including Se, Se salt, Se enriched yeast, Se + VE, Se + VC) were superior to placebo/no treatment in repairing metaphyseal lesions. There was uncertainty around the difference between two active treatments. However, the probabilistic ranking of interventions showed that Se salt was ranked the most effective, followed by Se + VE, Se enriched yeast, Se and then Se + VC.

### *Relation to other studies*

Studies have proposed that selenium deficiency is the underlying factor that predisposes the target cells (chondrocytes) to oxidative stress from free-radical carriers<sup>35</sup>. In most highly endemic area, the level of total soil selenium concentrations is typically low. A meta-analysis of the correlation between selenium and KBD reported that selenium levels in water, soil, cereal, and corn in endemic regions were lower than regions without high rates of KBD<sup>36</sup>. Furthermore, most of the inhabitants living in areas with KBD have a low selenium nutritive status, which is reflected by low selenium contents in their blood serum, red blood cell, urine, and hair.

The effectiveness of various methods of selenium supplementation for children has been demonstrated by many studies including Se salt<sup>37</sup>, Se enriched yeast<sup>26</sup>, oral sodium selenite tablet<sup>15</sup>, spraying Se on crops<sup>38</sup>, and Se enriched fertilizer<sup>39</sup>. Selenium supplementation was associated with a simultaneous decrease in the prevalence of KBD, along with an increased selenium content in the hair of inhabitants living in areas with KBD. It was reported that the incidence of radiographic evidence of metaphysical lesions of the hands was 44.8% in 1990 at Cuimu town of the Shaanxi province in children aged 7~12 years. After implementation of comprehensive prevention measures of KBD, especially using Se salt, the incidence these x-ray findings decreased to 0.3% in 2010<sup>40</sup>. The low incidence of KBD also may explain why there has not been any studies about Se treatment for KBD published in recent years.

Se salt was produced by adding 0.833 g of sodium selenite powder into every 50 kg of source salt and then expanding it to 1:60,000 Se salt. Although administration of Se tablet is effective for preventing and treating KBD in children<sup>14,15</sup>, it is very difficult for millions of children living in endemic areas to adhere to a long-term medication. However, salt is a nec-

1  
2  
3  
4        essary part of daily life and food intake. The compliance can be more effectively guaranteed.  
5  
6        A limitation to the findings about Se salt is that due to the difficulty of carrying out a RCT  
7  
8        comparing Se salt with placebo or other active drugs, only one RCT has been done<sup>31</sup>. Howev-  
9  
10       er, one meta-analysis involving 11 non-RCTs (2652 participants) also showed that supple-  
11  
12       ment Se salt was effective for preventing and treatment for KBD in Children<sup>37</sup>. Since Se salt  
13  
14       is the most economical way for low-income families, it is anticipated that continuous use of  
15  
16       Se salt and other comprehensive prevention measures may help to eliminate the KBD carti-  
17  
18       lage damages in Children<sup>41</sup>.

21                Despite the evidence in our meta-analysis, there remains some controversy around sele-  
22  
23       nium supplementation in relationship with iodine deficiency. In a cross sectional study in Ti-  
24  
25       bet area, Moreno-Reyes and his colleges found no association between individual selenium  
26  
27       status and KBD, whereas iodine deficiency was a risk factor<sup>42</sup>. Similarly, the only RCT<sup>32</sup>  
28  
29       published in English in our review showed only 1 case of improvements in X-ray in sodium  
30  
31       selenite group. The negative findings of the above studies should, however, be interpreted  
32  
33       with caution. These studies were all conducted in Tibet where selenium and iodine are both  
34  
35       deficient in the diet. Selenium and iodine deficiency are both risk factors of KBD<sup>35</sup>. In animal  
36  
37       experiments, growth retardation was observed in rats fed with a low selenium diet<sup>43</sup>, and im-  
38  
39       paired bone development was observed with an iodine deficient diet<sup>44</sup>. We do not exclude the  
40  
41       possibility that selenium supplementation may not counterbalance the negative effects of  
42  
43       long-term iodine deficiency. So KBD seems unlikely to be due to only one cause. Other ge-  
44  
45       netic and environmental factors may confer either a relatively protective effect or accelerate  
46  
47       the disease.

#### 51        ***Limitations of the trials included in this review***

52                Overall, the methodological quality of the included trails was low. The method of ran-  
53  
54  
55  
56  
57  
58  
59  
60

1  
2  
3  
4 domization and allocation concealment were not described in all the included trials. Double-  
5  
6 blinding was reported in 8 trials and details of the blinding methods were reported in 3 trials.  
7  
8 Withdrawal rates of participants were less than 20% in 8 trials. Only Six trials performed in-  
9  
10 tention to treat analysis.  
11

12  
13 After assessment of the overall quality of the evidence, we downgraded our primary  
14  
15 outcomes from high to low or very low quality, because of the high risk of bias due to unclear  
16  
17 sequence generation and allocation concealment. In addition, we also found in some trials  
18  
19 that there were very small sample sizes and higher levels of statistical heterogeneity, which  
20  
21 caused serious inconsistency between the included trials.  
22

### 23 ***Strengths and weaknesses***

24  
25 The present NMA integrated evidence from direct and indirect comparisons. The litera-  
26  
27 ture search strategy was extensive, which makes it unlikely that we missed any relevant trial.  
28  
29 Trial selection and data extraction including quality assessments were done independently by  
30  
31 two authors to minimize bias and transcription errors. In this NMA, we applied the GRADE  
32  
33 system to NMAs based on the GRADE working group to rate the quality of the evidence.  
34  
35

36  
37 Potential limitations to this review exist. Firstly, the duration of follow-up diverse wide-  
38  
39 ly which varied from 6 to 36 months. However, follow-up period of most studies are concen-  
40  
41 trated in 12 months. So the data in our review were extracted to the nearest 12 months. Even  
42  
43 so, the best beneficial duration of therapy period remains unclear for KBD. Conferring with  
44  
45 other RCT about osteoarthritis, 36 months of therapy duration may be appropriate for observ-  
46  
47 ing X-ray repairing changes of KBD. Secondly, the sample sizes of our included RCTs were  
48  
49 all small. Sample size calculations were not mentioned in any of the studies. Thirdly, despite  
50  
51 our exhaustive search, only 15 RCTs conducted in China were included in this review. North  
52  
53 Korea and Russia also have a high incidence of KBD; some trials may have been published  
54  
55  
56  
57  
58  
59  
60



1  
2  
3  
4 in local journals that were missed in our search. Finally, the heterogeneity in this meta-  
5  
6 analysis was somewhat high, which could be explained by a lack of concealment of alloca-  
7  
8 tion, failure to perform an ITT analysis, small sample sizes of the studies included and differ-  
9  
10 ences between different preparations of selenium. As with heterogeneity between trials, in-  
11  
12 consistency between direct and indirect comparisons was also near zero. Although we cannot  
13  
14 rule out clinically relevant inconsistency, we have no indication that clinical characteristics of  
15  
16 included patients or other trial characteristics confounded the indirect comparisons.  
17  
18

## 19 **Conclusions**

### 20 *Implications for clinical practice*

21  
22 Based on this NMA, it appears that all types of Se supplementation were more effective  
23  
24 than placebo for the treatment of KBD in children. Ranking on efficacy indicated that Se salt  
25  
26 were highest, followed by Se + VE, Se enriched yeast, Se, Se + VC, VC, and placebo/no  
27  
28 treatment. Since the overall quality of the evidence was low or very low, the SUCRA values  
29  
30 may be misleading and should be considered jointly with the GRADE confidence in the esti-  
31  
32 mates for each comparison. The quality of the evidence is insufficient to draw a conclusion  
33  
34 about what method of selenium supplementation is most effective. Se salt can be an econom-  
35  
36 ical and convenient strategy for controlling KBD in endemic areas. However, selenium over-  
37  
38 dose is toxic. Therefore, suitable dosages should be strictly controlled and content of seleni-  
39  
40 um should be closely monitored in order to avoid harmful effects on health.  
41  
42  
43  
44  
45  
46  
47

### 48 *Implications for research*

49  
50 Since KBD among children has almost disappeared, we believe it unlikely that future tri-  
51  
52 als will involve a RCT to demonstrate the clinically relevant benefit of any selenium supple-  
53  
54 mentation for children with KBD. At present, there are no effective clinical measures to re-  
55  
56  
57  
58  
59  
60

1  
2  
3  
4 pair the cartilage damage of KBD in adults. Tissue engineering and gene therapy approaches  
5  
6 may become the potential treatment strategy that can applied to the treatment of the KBD car-  
7  
8 tilage damages.  
9

### 12 13 **Contributors**

14  
15 Dongmei Xie and Yulin Liao conceived the review question, reviewed studies for inclusion,  
16  
17 assessed the included studies, extracted data, completed the first draft, and edited the review.  
18  
19 Jirong Yue and Chao Zhang analyzed the data, did the literature search, advised and coordi-  
20  
21 nated the review development, performed part of the writing and editing of the review, ap-  
22  
23 proved the final version of the review prior to submission, and is also a guarantor. Yanyan  
24  
25 Wang, Chuanyao Deng and Ling Chen contributed to the development of the review ques-  
26  
27 tion, edited and provided intellectual contributions to the review.  
28  
29  
30  
31

32 **Funding Statement:** This research was funded by China National Science & Technology  
33  
34 Pillar Program (2007BA125B04).  
35

36  
37 **Conflict of interest:** We declare that we have no conflicts of interest.  
38

39 **Role of the funding source:** The sponsors of the study had no role in study design, data col-  
40  
41 lection, data analysis, data interpretation, or writing of the report. The corresponding author  
42  
43 had full access to all the data in the study and had final responsibility for the decision to sub-  
44  
45 mit for publication.  
46

47 **Acknowledgments:** Dr. Joseph H. Flaherty is especially acknowledged for editorial review  
48  
49 and language assistance.  
50

51  
52 **Data sharing statement:** No additional data are available.  
53

54  
55 **Reference:**  
56  
57  
58  
59  
60

1. Mathieu F, Begaux F, Lan ZY, Suetens C, Hinsenkamp M. Clinical manifestations of Kashin-Beck disease in Nyemo Valley, Tibet. *Int Orthop* 1997;21:151-6.
2. Sokoloff L. The history of Kashin-Beck disease. *N Y State J Med* 1989;89:343-51.
3. Allander E. Kashin-Beck disease. An analysis of research and public health activities based on a bibliography 1849-1992. *Scand J Rheumatol Suppl* 1994;99:1-36.
4. P. R. C. Ministry of Health. The prevention and control status of Kashin-Beck disease in 2011. Available at: <http://www.nhfpc.gov.cn/htmlfiles/zwgkzt/ptjnj/year2012/index2012.html>;2012.
5. Xiong G. Diagnostic, clinical and radiological characteristics of Kashin-Beck disease in Shaanxi Province, PR China. *Int Orthop* 2001;25:147-50.
6. Peng A, Yang C, Rui H, Li H. Study on the pathogenic factors of Kashin-Beck disease. *J Toxicol Environ Health* 1992;35:79-90.
7. Luo R, Liu G, Liu W, Pei F, Zhou Z, Li J, et al. Efficacy of celecoxib, meloxicam and paracetamol in elderly Kashin-Beck disease (KBD) patients. *International orthopaedics* 2011;35:1409-14.
8. Yu FF, Xia CT, Fang H, Han J, Younus MI, Guo X. Evaluation of the therapeutic effect of treatment with intra-articular hyaluronic acid in knees for Kashin-Beck disease: A meta-analysis. *Osteoarthritis Cartilage* 2014;22:718-25.
9. Mathieu F, Suetens C, Begaux F, De Maertelaer V, Hinsenkamp M. Effects of physical therapy on patients with Kashin-Beck disease in Tibet. *Int Orthop* 2001;25:191-3.
10. Yue J, Yang M, Yi S, Dong B, Li W, Yang Z, et al. Chondroitin sulfate and/or glucosamine hydrochloride for Kashin-Beck disease: a cluster-randomized, placebo-controlled study. *Osteoarthritis and cartilage* 2012;20:622-9.
11. Zhongmin T, Yang L, Zhou J, Gao D, Dong S, Xie J, et al. Comparison of treatment results of arthroscopic knee debridement alone with a combination of arthroscopic debridement and drilling decompression in knee Kashin-Beck disease (in Chinese). *Chin J Endo* 2009:371-4.
12. Liu FD, Wang ZL, Hinsenkamp M. Osteotomy at the knee for advanced cases of Kashin-Beck disease. *Int Orthop* 1998;22:87-91.
13. Guo X, Ma WJ, Zhang F, Ren FL, Qu CJ, Lammi MJ. Recent advances in the research of an endemic osteochondropathy in China: Kashin-Beck disease. *Osteoarthritis Cartilage* 2014;22:1774-83.
14. Zou K, Liu G, Wu T, Du L. Selenium for preventing Kashin-Beck osteoarthropathy in children: a meta-analysis. *Osteoarthritis Cartilage* 2009;17:144-51.
15. Jirong Y, Huiyun P, Zhongzhe Y, Birong D, Weimin L, Ming Y, et al. Sodium selenite for treatment of Kashin-Beck disease in children: A systematic review of randomised controlled trials. *Osteoarthritis and Cartilage* 2012;20:605-13.
16. National Health and Family Planning Commission of the People's Republic of China. Diagnostic criteria of Kashin-Beck disease (GB16003-1995).[1995-12-15]

17. Liang S, Zhang F, Wang L, Yang Y, Lu X, Chen C. The effect of the treatment of Kashin Beck disease (in Chinese). *Chin J Endo* 1996;15:378-80.
18. Higgins J, Green S. *Cochrane Handbook for Systematic Reviews of Interventions* (Version 5.1.0). The Cochrane Collaboration, 2011. Available at: <http://www.cochrane-handbook.org>.
19. Puhan MA, Schünemann HJ, Murad MH, Li T, Brignardello-Petersen R, Singh JA, et al. A GRADE Working Group approach for rating the quality of treatment effect estimates from network meta-analysis. *BMJ* 2014; 349:g5630.
20. Niu GH, Zhang BH, Song ZY, Pang ZG, Wang YY, Ma QH. An observation study on effect of oral sodium selenite for prevention and treatment of kashin-beck effect (in Chinese). *Heilongjiang Med J* 1981;15-7.
21. The Yongshou Scientific Survey Group of Kashin-Beck Disease. Effect and mechanism of selenium in the prevention and cure of 424 Kashin-Beck's patients (in Chinese). *Chin J Endemiol* 1982;1:145-50.
22. Wang DS, Fu BS, Sun QY, Yang WZ, Bao BJ, Huang FH, et al. Dynamic observation of sodium selenite and vitamin E in the treatment of Kashin Beck disease (in Chinese). *Chin J Endemiol* 1983;2:204-7.
23. Cui ZJ, Lin BH, Jin CS, Lin JZ. An observation on effect of the treatment of Kashin-Beck disease using Vitamin C or sodium selenite (in Chinese). *End Dis Bull* 1984;1:63.
24. Niu GH, Zhang BZ, Li XZ, Liu JX, Zhu ZY, Hou SF. Results of study of two years on the preventing and controlling Kashin-Beck's disease with selenium seen under X-rays and discussion of etiology (in Chinese). *Chin J Endemiol* 1984;3:199-201.
25. Guo LB, Lu Q, Tang HF, Lei H, Dong HQ. An one year observation by X-ray on effect of the treatment of Kashin-Beck disease using oral sodium selenite (in Chinese). *J Chengde Univ Med Sci* 1985:67-70.
26. Guo LB, Lu Q, Dong HQ, Tang HF, Lei H, Zhang ZM, et al. One year of observation on effect of selenium enriched yeast for treatment of Kashin Beck disease (in Chinese). *Chin J Endemiol* 1986;5:16-20.
27. Niu GH, Zhang BZ, Hou SF, Zhu ZY, Li DZ, Zhong PL, et al. Study of two years on the preventing and controlling Kashin-Beck's disease with oral sodium selenite seen under X-rays (in Chinese). *J Pract Endemio* 1986;1:16-8.
28. Wu QX. An observation by X-ray on effect of the prevention and treatment of Kashin-Beck disease using oral sodium selenite (in Chinese). *Chin J Endemiol* 1986;5:210-20.
29. Deng JY. Effect of sodium selenite oral application on Kashin-Beck disease, a three years observation (in Chinese). *Chin J Endemiol* 1988;7:117-20.
30. Niu GH, Zhang BZ, Hou SF. Effect of semis-dosage selenium on controlling of Kashin-Beck

disease (in Chinese). *Chin J Endemiol* 1990;99-100.

31. Zhou XK, Wang WL, Wang EQ, Yu AL, Ren YG, Xu JM, et al. The observation on effect of selenium and vitamin C for treating Kashin Beck disease (in Chinese). *End Dis Bull* 1991;100-3.

32. Moreno-Reyes R, Mathieu F, Boelaert M, Begaux F, Suetens C, Rivera MT, et al. Selenium and iodine supplementation of rural Tibetan children affected by Kashin-Beck osteoarthropathy. *Am J Clin Nutr* 2003;78:137-44.

33. Chen Y, Huo JM, Wang ZL, Tan XW, Xue L, Geng D. A comparative research on the treatment effect of Se supplement, Vit C supplement and cereals dryness on Kashin-Beck disease (in Chinese). *Chin J Endemiol* 2003;18:343-6.

34. Cai LW, Zhang YL. An observation by X-ray on effect of selenium in the treatment of 40 Kashin-Beck children (in Chinese). *J Comm Med* 2005;3:60-1.

35. Yao Y, Pei F, Kang P. Selenium, iodine, and the relation with Kashin-Beck disease. *Nutrition* 2011;27:1095-100.

36. Wang Q, Li XX, Li L, Tian JH, Yang KH, Wu TX, et al. Correlation between selenium and Kashin-Beck disease: A meta-analysis (in Chinese). *Chin J Evid Based Med* 2013;13:1421-30.

37. Yu FF, Han J, Wang X, Fang H, Liu H, Guo X. Salt-Rich Selenium for Prevention and Control Children with Kashin-Beck Disease: a Meta-analysis of Community-Based Trial. *Biol Trace Elem Res* 2016;170:25-32.

38. Guo X, Ding D, Wang Z, Lv S, Zhang J, Tan X, et al. A study on the reparative action of x-ray lesions in metaphyses and distal end of bone in children's fingers with kashin-beck disease treated by se-fortified wheat (in Chinese). *Chin J Ctrl Endem Dis* 1990:269-72.

39. Chen D, Ren S, Lu W, Li J, Fan L, Jia Z, et al. Effect of applying selenium fertilizer to improve soil and increase selenium level in food for prevention and treatment of Kashin-Beck disease (in Chinese). *J Env Sci* 1993;5:299-309.

40. Xu GY, Lu XY, Cao XG. Analysis on monitoring data of Kashin-Beck disease in Shannxi Province during 19 years (in Chinese). *Chin J Contr End Dis* 2009:442-6.

41. Ning Y, Wang X, Wang S, Zhang F, Zhang L, Lei Y, et al. Is it the appropriate time to stop applying selenium enriched salt in kashin-beck disease areas in China? *Nutrients* 2015;7:6195-212.

42. Moreno-Reyes R, Suetens C, Mathieu F, Begaux F, Zhu D, Rivera MT, et al. Kashin-Beck osteoarthropathy in rural Tibet in relation to selenium and iodine status. *N Engl J Med* 1998;339:1112-20.

43. Sasaki S, Iwata H, Ishiguro N, Habuchi O, Miura T. Low-selenium diet, bone, and articular cartilage in rats. *Nutrition* 1994;10:538-43.

44. Goss AN, Sampson WJ, Townsend GC, McIntosh GH. Effect of iodine deficiency on craniofacial growth in young common marmosets (*Callithrix jacchus*). *J Craniofac Genet Dev Biol* 1988;8:225-33.

1  
2  
3  
4  
5  
6  
7  
8  
9  
10  
11  
12  
13  
14  
15  
16  
17  
18  
19  
20  
21  
22  
23  
24  
25  
26  
27  
28  
29  
30  
31  
32  
33  
34  
35  
36  
37  
38  
39  
40  
41  
42  
43  
44  
45  
46  
47  
48  
49  
50  
51  
52  
53  
54  
55  
56  
57  
58  
59  
60

For peer review only

## Figure Legends

### Fig 1 Flow diagram of included study

### Fig 2 Network of eligible comparisons for treatment efficacy network meta-analysis for KBD

The width of lines is proportional to the number of studies compared in every pair of treatments, and the size of nodes is proportional to the total sample size of each treatment. Two-arm study n=11; Three-arm study n=3 (Cui 1984<sup>23</sup>, Guo 1986<sup>26</sup>, Chen 2003<sup>33</sup>); Four-arm study n=1 (Zhou 1991<sup>31</sup>)

OR = Odds ratio, CI = Confidence intervals, Se = Sodium selenite, Se salt = selenium salt, VC = vitamin C, Se + VC = the combination of sodium selenite with vitamin C; Se + VE = the combination of sodium selenite with vitamin E, Se yeast = selenium enriched yeast.

### Fig 3 Network estimates of mean ORs, their 95% confidence intervals and 95% prediction intervals (red extensions)

OR = Odds ratio, CI = Confidence intervals, PrI = prediction intervals, Se = Sodium selenite, Se salt = selenium salt, VC = vitamin C, Se + VC = the combination of sodium selenite with vitamin C; Se + VE = the combination of sodium selenite with vitamin E, Se yeast = selenium enriched yeast.

### Fig 4 Consistency test in the network Meta-analysis

IF= inconsistency factor, OR = Odds ratio, CI = Confidence intervals, Se = Sodium selenite, Se salt = selenium salt, VC = vitamin C, Se + VC = the combination of sodium selenite with vitamin C; Se + VE = the combination of sodium selenite with vitamin E, Se yeast = selenium enriched yeast.

The x-axis is Log OR, and the vertical line is 0. IF is the absolute inconsistency factor, meaning the logarithm of the ratio of odds ratios (RoR) of direct and indirect evidence for each comparison loop. The absolute inconsistency factor values and confidence intervals are truncated at zero indicate no significant difference of inconsistency.

### Fig 5 SUCRA for the cumulative probabilities

SUCRA=surface under cumulative ranking



Fig 1 Flow diagram of included study

154x182mm (300 x 300 DPI)





Fig 2 Network of eligible comparisons for treatment efficacy network meta-analysis for KBD. The width of lines is proportional to the number of studies compared in every pair of treatments, and the size of nodes is proportional to the total sample size of each treatment. Two-arm study  $n=11$ ; Three-arm study  $n=3$  (Cui 1984, Guo 1986, Chen 2003); Four-arm study  $n=1$  (Zhou 1991)<sub>T</sub>. OR = Odds ratio, CI = Confidence intervals, Se = Sodium selenite, Se salt = selenium salt, VC = vitamin C, Se + VC = the combination of sodium selenite with vitamin C ; Se + VE = the combination of sodium selenite with vitamin E, Se yeast = selenium enriched yeast.

381x277mm (300 x 300 DPI)

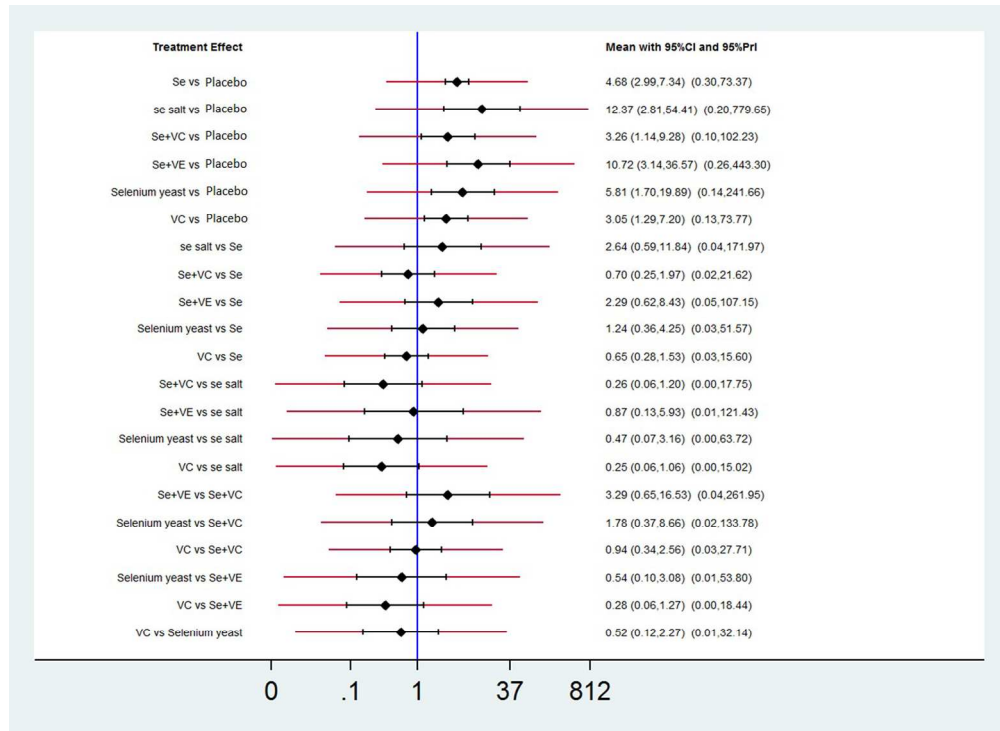

Fig 3 Network estimates of mean ORs, their 95% confidence intervals and 95% prediction in-tervals (red extensions)† . OR = Odds ratio, CI = Confidence intervals, PrI = prediction intervals, Se = Sodium selenite, Se salt = selenium salt, VC = vitamin C, Se + VC = the combination of sodium selenite with vitamin C; Se + VE = the combination of sodium selenite with vitamin E, Se yeast = selenium enriched yeast.†

454x330mm (300 x 300 DPI)

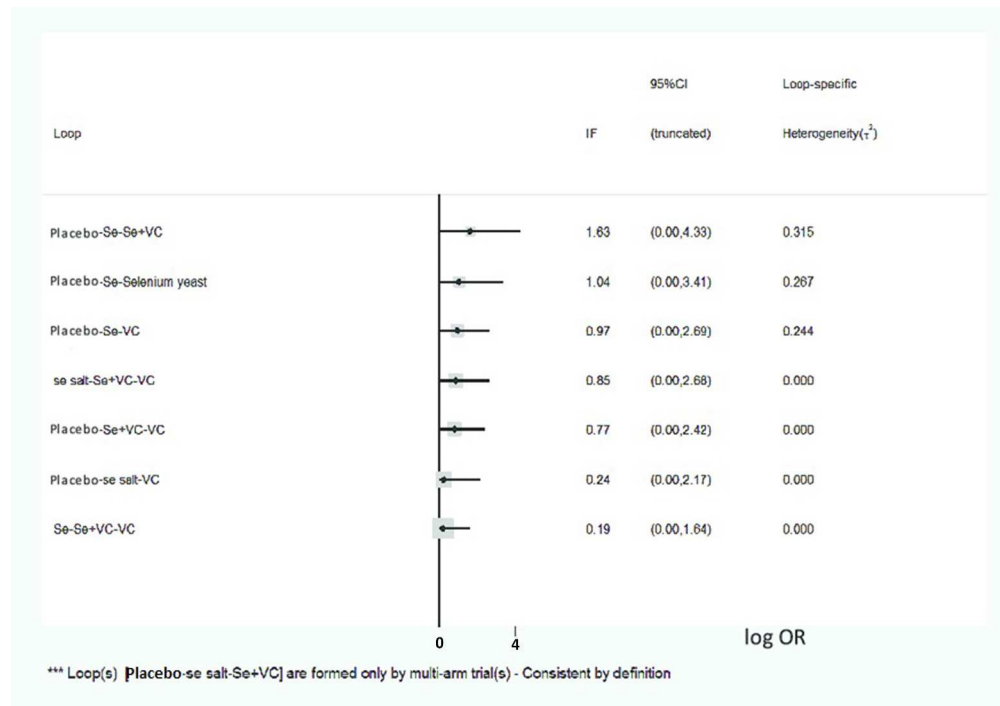

30 Fig 4 Consistency test in the network Meta-analysis. † IF= inconsistency factor, OR = Odds ratio, CI =  
 31 Confidence intervals, Se = Sodium selenite, Se salt = selenium salt, VC = vitamin C, Se + VC = the  
 32 combination of sodium selenite with vitamin C; Se + VE = the combination of sodium selenite with vitamin  
 33 E, Se yeast = selenium enriched yeast.† The x-axis is Log OR, and the vertical line is 0. IF is the absolute  
 34 inconsistency factor, meaning the logarithm of the ratio of odds ratios (RoR) of direct and indirect evidence  
 35 for each comparison loop. The absolute inconsistency factor values and confidence intervals are truncated at  
 36 zero indicate no significant difference of inconsistency.†

37 308x217mm (300 x 300 DPI)

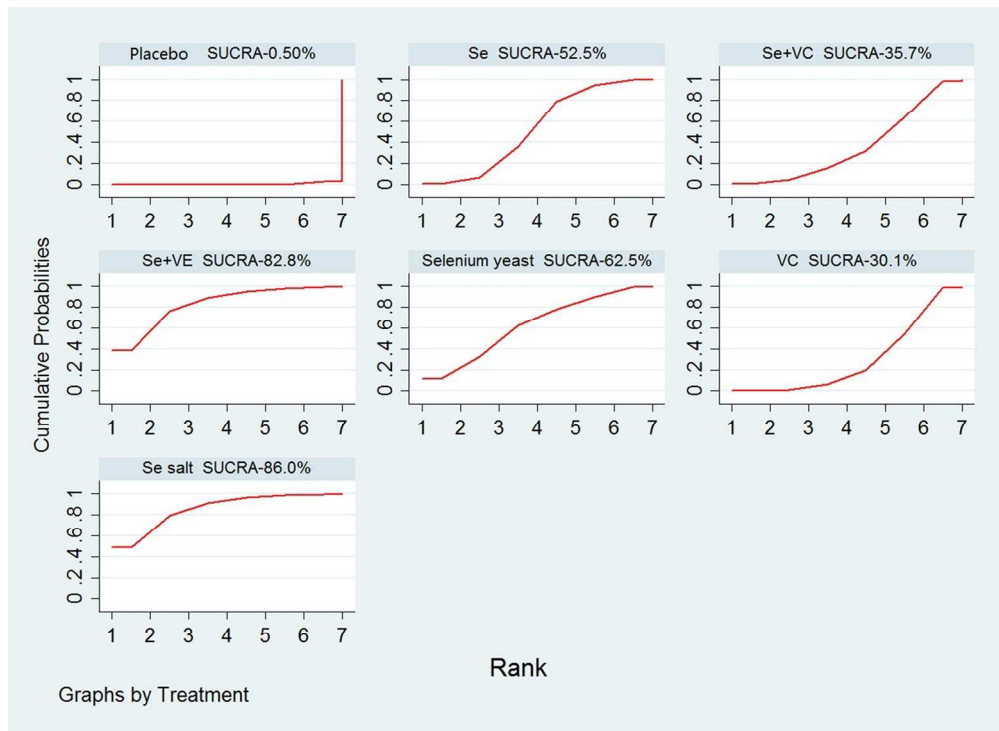

450x328mm (300 x 300 DPI)

**Appendix table 1 Characteristics of excluded studies(ordered by study ID)**

| <b>Study</b> | <b>Reason for exclusion</b> |
|--------------|-----------------------------|
| Ding 1985    | No relevant result          |
| Fan 1986     | Not a RCT                   |
| Guo 1990     | Not a RCT                   |
| Han 2013     | Not a RCT                   |
| He 1988      | Not a RCT                   |
| Huang 1959   | Not a RCT                   |
| Li 1986      | Not a RCT                   |
| Li 2004      | Preventive study            |
| Liang 1986   | Preventive study            |
| Ma 1996      | Not a RCT                   |
| Sun 2008     | Not a RCT                   |
| Suolang 2008 | Not a RCT                   |
| Wang 1983    | Preventive study            |
| Wang 1988    | Not a RCT                   |
| Wang 1989    | Preventive study            |
| Wu 1991      | Preventive study            |
| Yang 2009    | Not a RCT                   |
| Yang 2010    | Not a RCT                   |
| Yi 2006      | Not a RCT                   |
| Yu 2016      | Not a RCT                   |
| Zhang 1989   | Not a RCT                   |
| Zhang 1996   | No relevant result          |
| Zhang 2006   | Not a RCT                   |
| Zhang 2009   | Not a RCT                   |
| Zhong 1986   | Not a RCT                   |
| Zhou 1998    | Not a RCT                   |

Appendix table 2 Characteristics of included trials

| Study                   | Case No. |       | Age  |      | Intervention                                                                                                              | Control                                  | Follow-up (months) | Outcome                                                                                                              |
|-------------------------|----------|-------|------|------|---------------------------------------------------------------------------------------------------------------------------|------------------------------------------|--------------------|----------------------------------------------------------------------------------------------------------------------|
|                         | I        | C     | I    | C    |                                                                                                                           |                                          |                    |                                                                                                                      |
| Niu 1981 <sup>20</sup>  | 27       | 29    | 6~13 | 6~13 | Se + VE: Se tablet 2mg/week +VE 15mg/day                                                                                  | Placebo/week                             | 12                 | Improvement of metaphyseal lesions on X-ray                                                                          |
| YSSG 1982 <sup>21</sup> | 166      | 159   | 3~13 | 3~13 | Se tablet, 1 mg/week (3-10 yrs), 2 mg/week (11-13 yrs)                                                                    | Placebo/week                             | 12                 | Improvement of metaphyseal lesions on X-ray                                                                          |
| Wang 1983 <sup>22</sup> | 47       | 42    | 5~15 | 5~15 | Se + VC: Se tablet 2mg/week +VE 15mg/day                                                                                  | No treatment                             | 11                 | Improvement of metaphyseal lesions on X-ray                                                                          |
| Cui 1984 <sup>23*</sup> | 30       | 30/30 | 7~19 | 7~19 | Se tablet, 1 mg/week (7-10 yrs), 2 mg/week (11-19 yrs)                                                                    | ①VC 200 mg 3 times/day;<br>②Placebo/week | 6~12               | Improvement of metaphyseal lesions on X-ray                                                                          |
| Niu 1984 <sup>24</sup>  | 56       | 59    | 6~13 | 6~13 | Se tablet first week: 1.0 mg/day (< 10 yrs), 2.0 mg/day (> 11 yrs); after: 1.0 mg/week (< 10 yrs), 2.0 mg/week (> 11 yrs) | Placebo/week                             | 24                 | Improvement of metaphyseal lesions on X-ray<br>Repairing rate at the distal end of phalanges in hands on X-ray films |
| Guo 1985 <sup>25</sup>  | 50       | 50    | 5~15 | 5~15 | Se tablet, 1 mg/week (<5 yrs), 2 mg/week (>5 yrs)                                                                         | Placebo/week                             | 12                 | Improvement of metaphyseal lesions on X-ray                                                                          |

| Study                   | Case No. |     | Age  |      | Intervention                                                                                                | Control      | Follow-up (months) | Outcome                                                                                                              |                              |
|-------------------------|----------|-----|------|------|-------------------------------------------------------------------------------------------------------------|--------------|--------------------|----------------------------------------------------------------------------------------------------------------------|------------------------------|
|                         | I        | C   | I    | C    |                                                                                                             |              |                    |                                                                                                                      |                              |
| Guo 1986 <sup>26*</sup> | 60/60    | 60  | 5~14 | 5~14 | ①Se tablet, 0.5mg/week (<7 yrs), 1 mg/week (>8 yrs);<br>②Se yeast, 0.5mg/week (<7 yrs), 1 mg/week (>8 yrs); | Placebo/week | 13                 | Improvement of metaphyseal lesions on X-ray                                                                          | metaphyseal lesions on X-ray |
| Niu 1986 <sup>27</sup>  | 285      | 277 | 6~13 | 6~13 | Se tablet, 1 mg/week (<10 yrs), 2 mg/week (>10 yrs)                                                         | Placebo/week | 12~24              | Improvement of metaphyseal lesions on X-ray<br>Repairing rate at the distal end of phalanges in hands on X-ray films | metaphyseal lesions on X-ray |
| Wu 1986 <sup>28</sup>   | 171      | 177 | 5~16 | 5~16 | Se tablet, 1 mg/week (< 10 yrs), 2 mg/week (> 10 yrs)                                                       | Placebo/week | 12                 | Improvement of metaphyseal lesions on X-ray                                                                          | metaphyseal lesions on X-ray |
| Deng 1988 <sup>29</sup> | 43       | 46  | 2~13 | 2~13 | Se tablet, no details                                                                                       | No treatment | 36                 | Improvement of metaphyseal lesions on X-ray<br>Repairing rate at the distal end of phalanges in hands on X-ray films | metaphyseal lesions on X-ray |

1  
2  
3  
4  
5  
6  
7  
8  
9  
10  
11  
12  
13  
14  
15  
16  
17  
18  
19  
20  
21  
22  
23  
24  
25  
26  
27  
28  
29  
30  
31  
32  
33  
34  
35  
36  
37  
38  
39  
40  
41  
42  
43  
44  
45  
46

| Study                           | Case No. |       | Age     |        | Intervention                                                                                                                                                               | Control                          | Follow-up (months) | Outcome                                                                                                  |             |
|---------------------------------|----------|-------|---------|--------|----------------------------------------------------------------------------------------------------------------------------------------------------------------------------|----------------------------------|--------------------|----------------------------------------------------------------------------------------------------------|-------------|
|                                 | I        | C     | I       | C      |                                                                                                                                                                            |                                  |                    |                                                                                                          |             |
| Niu 1990 <sup>30</sup>          | 210      | 228   | 6~13    | 6~13   | Se tablet, first week: 0.5 mg/day (< 5 yrs), 1.0 mg/day (6-10 yrs), 2.0 mg/day (> 11 yrs); after: 1.0 mg/month (< 5 yrs), 2.0 mg/month (6-10 yrs), 4.0 mg/month (> 11 yrs) | Placebo/month                    | 12                 | Improvement of lesions on X-ray                                                                          | metaphyseal |
| Zhou 1991 <sup>31#</sup>        | 25/30    | 35/29 | 4~12    | 4~12   | ①Se + VC: Se tablet 1mg/10day+ VC 100mg/day;<br>②Se salt (sodium selenite: salt = 1:60,000) /10day                                                                         | ③VC, 300mg/day;<br>④No treatment | 12                 | Improvement of lesions on X-ray                                                                          | metaphyseal |
| Moreno-Reyes 2003 <sup>32</sup> | 113      | 95    | 10±0.28 | 10±0.3 | Se tablet, 1 mg/week                                                                                                                                                       | Placebo/week                     | 12                 | Improvement of lesions on X-ray<br>Repairing rate at the distal end of phalanges in hands on X-ray films | metaphyseal |
| Chen 2003 <sup>33*</sup>        | 50/50    | 50    | 6~11    | 6~11   | ①Se tablet 1mg/week;<br>② Se + VC: Se tablet 1mg/week+ VC 300 mg 2 times/day                                                                                               | VC 300mg bid                     | 12                 | Improvement of lesions on X-ray                                                                          | metaphyseal |



1  
2  
3  
4  
5  
6  
7  
8  
9  
10  
11  
12  
13  
14  
15  
16  
17  
18  
19  
20  
21  
22  
23  
24  
25  
26  
27  
28  
29  
30  
31  
32  
33  
34  
35  
36  
37  
38  
39  
40  
41  
42  
43  
44  
45  
46

| Study                  | Case No. |    | Age  |      | Intervention                                                   | Control      | Follow-up (months) | Outcome                                                                                                              |
|------------------------|----------|----|------|------|----------------------------------------------------------------|--------------|--------------------|----------------------------------------------------------------------------------------------------------------------|
|                        | I        | C  | I    | C    |                                                                |              |                    |                                                                                                                      |
| Cai 2005 <sup>34</sup> | 31       | 31 | 7~13 | 7~13 | Se tablet, 2mg/10 days (7-10 yrs),<br>3 mg/10 days (11-13 yrs) | No treatment | 18                 | Improvement of metaphyseal lesions on X-ray<br>Repairing rate at the distal end of phalanges in hands on X-ray films |

I= intervention, C = control, YSSG = Yongshou scientific survey group of Kashin-Beck Disease, yrs = years, Se = Sodium selenite, Se salt =selenium salt, VC = vitamin C, Se + VC = the combination of sodium selenite with vitamin C ; Se + VE = the combination of sodium selenite with vitamin E, Se yeast = selenium enriched yeast. \* Three arms study, # Four arms study

**Appendix table 3 Risk of Bias of Included Studies**

| Study                   | Balanced allocation | Allocation concealment | Blinding     | Completeness of outcome | Selective outcome reporting | Other Bias            | overall assessment* |
|-------------------------|---------------------|------------------------|--------------|-------------------------|-----------------------------|-----------------------|---------------------|
| Niu 1981 <sup>20</sup>  | Unclear             | Unclear                | Double-blind | Low                     | Low                         | Low                   | Unclear             |
| YSSG 1982 <sup>21</sup> | Unclear             | Unclear                | Double-blind | Low, No dropout         | Low                         | Low                   | Unclear             |
| Wang 1983 <sup>22</sup> | unclear             | unclear                | Double-blind | High, dropouts >20%     | Low                         | High, no ITT analysis | High                |
| Cui 1984 <sup>23</sup>  | unclear             | unclear                | Double-blind | High, dropouts >20%     | Low                         | High, no ITT analysis | High                |
| Niu 1984 <sup>24</sup>  | Unclear             | Unclear                | Double-blind | Low, No dropout         | Low                         | High, no ITT analysis | High                |
| Guo 1985 <sup>25</sup>  | Unclear             | Unclear                | Not Used     | High, dropouts >20%     | Low                         | High, no ITT analysis | High                |
| Guo 1986 <sup>26</sup>  | Unclear             | Unclear                | Unclear      | High, dropouts >20%     | Low                         | High, no ITT analysis | High                |
| Niu 1986 <sup>27</sup>  | Unclear             | Unclear                | Double-blind | Low, No dropout         | Low                         | Low                   | Unclear             |

|    |                                 |         |         |              |                           |     |                       |         |
|----|---------------------------------|---------|---------|--------------|---------------------------|-----|-----------------------|---------|
| 1  |                                 |         |         |              |                           |     |                       |         |
| 2  |                                 |         |         |              |                           |     |                       |         |
| 3  | Wu 1986 <sup>28</sup>           | Unclear | Unclear | Double-blind | Unclear, No dropout < 20% | Low | High, no ITT analysis | High    |
| 4  |                                 |         |         |              |                           |     |                       |         |
| 5  |                                 |         |         |              |                           |     |                       |         |
| 6  |                                 |         |         |              |                           |     |                       |         |
| 7  |                                 |         |         |              |                           |     |                       |         |
| 8  | Deng 1988 <sup>29</sup>         | Unclear | Unclear | Unclear      | Low, drop out <10%        | Low | High, no ITT analysis | High    |
| 9  |                                 |         |         |              |                           |     |                       |         |
| 10 |                                 |         |         |              |                           |     |                       |         |
| 11 |                                 |         |         |              |                           |     |                       |         |
| 12 | Niu 1990 <sup>30</sup>          | Unclear | Unclear | Single-blind | Low, No dropout           | Low | Low                   | Unclear |
| 13 |                                 |         |         |              |                           |     |                       |         |
| 14 |                                 |         |         |              |                           |     |                       |         |
| 15 | Zhou 1991 <sup>31</sup>         | Unclear | Unclear | Unclear      | Low, No dropout           | Low | Low                   | Unclear |
| 16 |                                 |         |         |              |                           |     |                       |         |
| 17 |                                 |         |         |              |                           |     |                       |         |
| 18 | Moreno-Reyes 2003 <sup>32</sup> | Unclear | Unclear | Double-blind | Unclear, No dropout < 20% | Low | High no ITT analysis  | High    |
| 19 |                                 |         |         |              |                           |     |                       |         |
| 20 | Chen 2003 <sup>33</sup>         | Unclear | Unclear | Unclear      | High, dropouts >20%       | Low | High, no ITT analysis | High    |
| 21 |                                 |         |         |              |                           |     |                       |         |
| 22 |                                 |         |         |              |                           |     |                       |         |
| 23 |                                 |         |         |              |                           |     |                       |         |
| 24 |                                 |         |         |              |                           |     |                       |         |
| 25 |                                 |         |         |              |                           |     |                       |         |
| 26 | Cai 2005 <sup>34</sup>          | Unclear | Unclear | Not Used     | Low, No dropout           | Low | Low                   | Unclear |
| 27 |                                 |         |         |              |                           |     |                       |         |
| 28 |                                 |         |         |              |                           |     |                       |         |

---

29 \*: Overall Score: Low risk of bias = no bias detected in any domain; Unclear risk of bias = one category or more is potentially at risk of bias; High risk of bias = one  
30 category or more is at high risk of bias.

31 ITT = intention to treat

Appendix table 4 Data from included studies

| Author                          | Treatment | Group 1  |           | Group 2   |          |           | Group 3   |          |           | Group 4   |          |           |
|---------------------------------|-----------|----------|-----------|-----------|----------|-----------|-----------|----------|-----------|-----------|----------|-----------|
|                                 |           | Case No. | Total No. | Treatment | Case No. | Total No. | Treatment | Case No. | Total No. | Treatment | Case No. | Total No. |
| Niu 1981 <sup>20</sup>          | Se +VE    | 24       | 27        | Placebo   | 7        | 29        |           |          |           |           |          |           |
| YSSG 1982 <sup>21</sup>         | Se        | 136      | 166       | Placebo   | 63       | 159       |           |          |           |           |          |           |
| Wang 1983 <sup>22</sup>         | Se+VE     | 42       | 47        | Placebo   | 25       | 42        |           |          |           |           |          |           |
| Cui 1984 <sup>23</sup>          | Se        | 14       | 30        | VC        | 16       | 30        | Placebo   | 10       | 30        |           |          |           |
| Niu 1984 <sup>24</sup>          | Se        | 54       | 56        | Placebo   | 36       | 59        |           |          |           |           |          |           |
| Guo 1985 <sup>25</sup>          | Se        | 27       | 50        | Placebo   | 5        | 50        |           |          |           |           |          |           |
| Guo 1986 <sup>26</sup>          | Se        | 33       | 60        | Se yeast  | 42       | 60        | Placebo   | 23       | 60        |           |          |           |
| Niu 1986 <sup>27</sup>          | Se        | 245      | 285       | Placebo   | 170      | 277       |           |          |           |           |          |           |
| Wu 1986 <sup>28</sup>           | Se        | 111      | 171       | Placebo   | 45       | 177       |           |          |           |           |          |           |
| Deng 1988 <sup>29</sup>         | Se        | 35       | 43        | Placebo   | 33       | 46        |           |          |           |           |          |           |
| Niu 1990 <sup>30</sup>          | Se        | 190      | 210       | Placebo   | 121      | 228       |           |          |           |           |          |           |
| Zhou 1991 <sup>31</sup>         | Se salt   | 24       | 30        | VC        | 17       | 35        | Se+ VC    | 10       | 25        | Placebo   | 10       | 29        |
| Moreno-Reyes 2003 <sup>32</sup> | Se        | 1        | 113       | Placebo   | 0        | 95        |           |          |           |           |          |           |
| Chen 2003 <sup>33</sup>         | Se        | 30       | 50        | VC        | 27       | 50        | Placebo   | 33       | 50        |           |          |           |
| Cai 2005 <sup>34</sup>          | Se        | 31       | 31        | Placebo   | 5        | 31        |           |          |           |           |          |           |

Se = Sodium selenite, Se salt =selenium salt, VC = vitamin C, Se + VC = the combination of sodium selenite with vitamin C ; Se + VE = the combination of sodium selenite with vitamin E, Se yeast = selenium enriched yeast.

1  
2  
3  
4  
5  
6  
7  
8  
9  
10  
11  
12  
13  
14  
15  
16  
17  
18  
19  
20  
21  
22  
23  
24  
25  
26  
27  
28  
29  
30  
31  
32  
33  
34  
35  
36  
37  
38  
39  
40  
41  
42  
43  
44  
45  
46

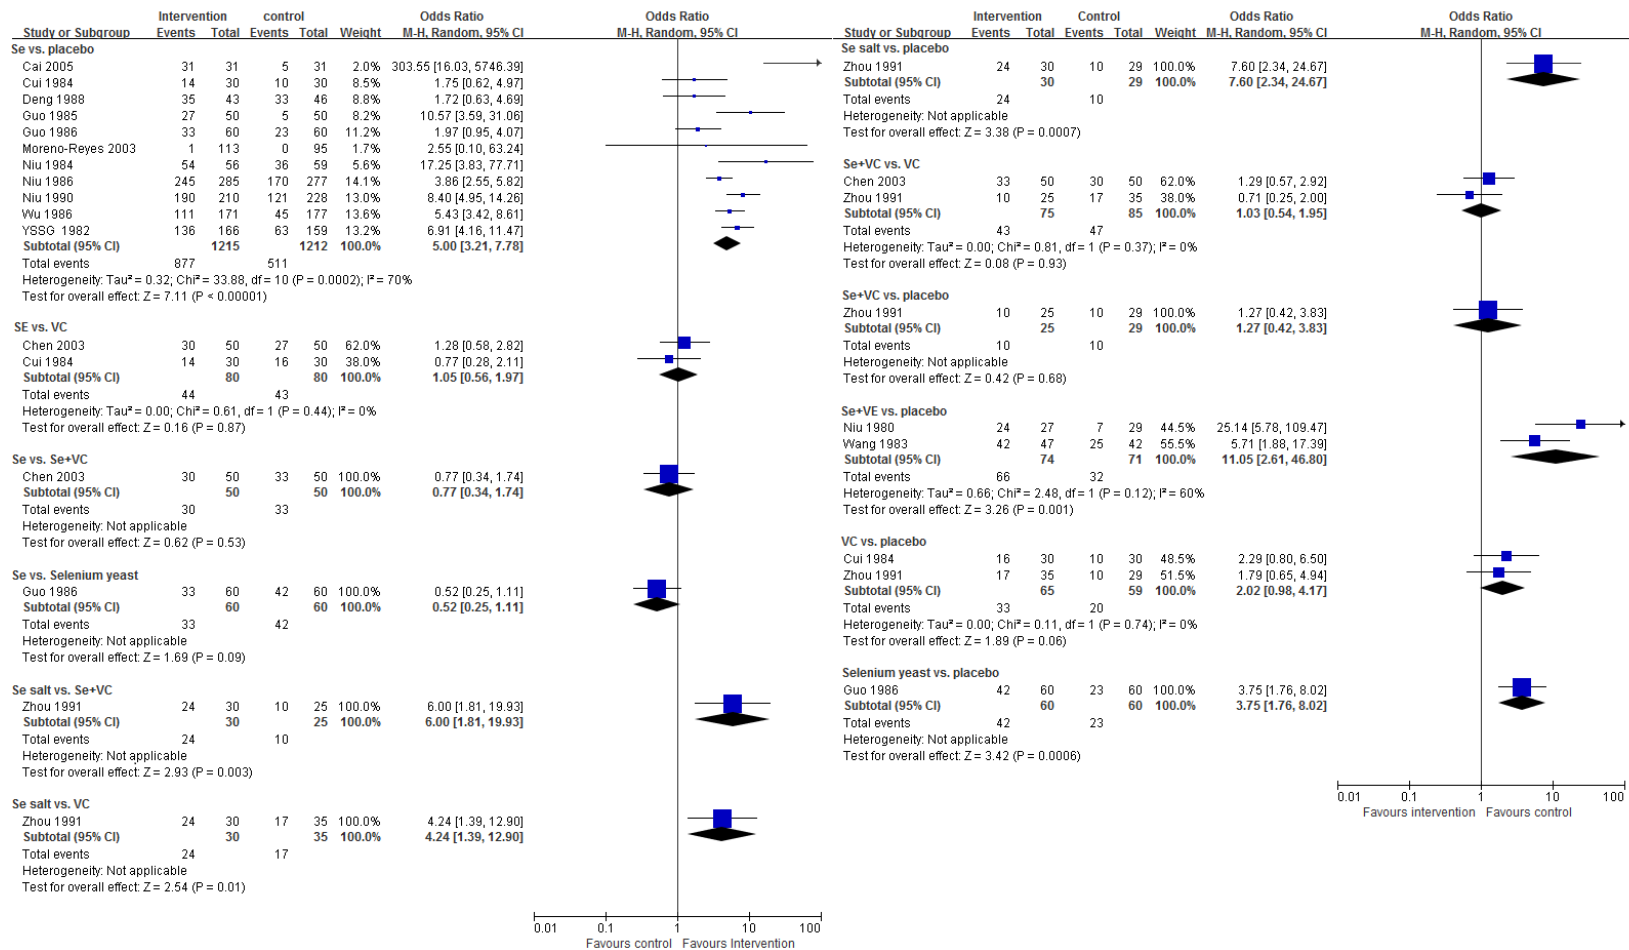

Appendix figure: Forest plot for intervention-control pairwise meta-analyses of repairing rate of metaphyseal lesions on X-ray films.

**Appendix box 1 Ovid search strategy**

#1 exp kashin-beck disease/  
#2 kashin-beck disease.tw.  
#3 kashin-bek disease.tw.  
#4 big bone disease.tw.  
#5 endemic osteoarthritis.tw.  
#6 Urov disease.tw.  
#7 1 or 2 or 3 or 4 or 5 or 6  
#8 sodium selenite.tw.  
#9 selenium .tw.  
#10 Se salt.tw.  
#11 enriched yeast  
#12 8 or 9 or 10 or 11  
#13 7 AND 12  
#14 randomized controlled trial.pt.  
#15 controlled clinical trial.pt.  
#16 randmoized.ab.  
#17 placebo.ab.  
#18 randomly.ab.  
#19 trial.ab.  
#20 groups.ab.  
#21 14 or 15 or 16 or 17 or 18 or 19 or 20  
#22 13 and 21  
#23 limit #22 to human

PRISMA NMA Checklist of Items to Include When Reporting A Systematic Review  
Involving a Network Meta-analysis

| Section/Topic             | Item # | Checklist Item                                                                                                                                                                                                                                                                                                                                                                                                                                                                                                                                                                                                                                                                                                                                                                          | Reported on Page #                               |
|---------------------------|--------|-----------------------------------------------------------------------------------------------------------------------------------------------------------------------------------------------------------------------------------------------------------------------------------------------------------------------------------------------------------------------------------------------------------------------------------------------------------------------------------------------------------------------------------------------------------------------------------------------------------------------------------------------------------------------------------------------------------------------------------------------------------------------------------------|--------------------------------------------------|
| <b>TITLE</b>              |        |                                                                                                                                                                                                                                                                                                                                                                                                                                                                                                                                                                                                                                                                                                                                                                                         |                                                  |
| Title                     | 1      | Identify the report as a systematic review <i>incorporating a network meta-analysis (or related form of meta-analysis)</i> .                                                                                                                                                                                                                                                                                                                                                                                                                                                                                                                                                                                                                                                            | Page 1                                           |
| <b>ABSTRACT</b>           |        |                                                                                                                                                                                                                                                                                                                                                                                                                                                                                                                                                                                                                                                                                                                                                                                         |                                                  |
| Structured summary        | 2      | Provide a structured summary including, as applicable:<br><b>Background:</b> main objectives<br><b>Methods:</b> data sources; study eligibility criteria, participants, and interventions; study appraisal; and <i>synthesis methods, such as network meta-analysis</i> .<br><b>Results:</b> number of studies and participants identified; summary estimates with corresponding confidence/credible intervals; <i>treatment rankings may also be discussed. Authors may choose to summarize pairwise comparisons against a chosen treatment included in their analyses for brevity.</i><br><b>Discussion/Conclusions:</b> limitations; conclusions and implications of findings.<br><b>Other:</b> primary source of funding; systematic review registration number with registry name. | Page 3                                           |
| <b>INTRODUCTION</b>       |        |                                                                                                                                                                                                                                                                                                                                                                                                                                                                                                                                                                                                                                                                                                                                                                                         |                                                  |
| Rationale                 | 3      | Describe the rationale for the review in the context of what is already known, <i>including mention of why a network meta-analysis has been conducted</i> .                                                                                                                                                                                                                                                                                                                                                                                                                                                                                                                                                                                                                             | Page 5                                           |
| Objectives                | 4      | Provide an explicit statement of questions being addressed, with reference to participants, interventions, comparisons, outcomes, and study design (PICOS).                                                                                                                                                                                                                                                                                                                                                                                                                                                                                                                                                                                                                             | Page 6                                           |
| <b>METHODS</b>            |        |                                                                                                                                                                                                                                                                                                                                                                                                                                                                                                                                                                                                                                                                                                                                                                                         |                                                  |
| Protocol and registration | 5      | Indicate whether a review protocol exists and if and where it can be accessed (e.g., Web address); and, if available, provide registration information, including registration number.                                                                                                                                                                                                                                                                                                                                                                                                                                                                                                                                                                                                  | Page 6<br>Registration number:<br>CRD42016051874 |
| Eligibility criteria      | 6      | Specify study characteristics (e.g., PICOS, length of follow-up) and report characteristics (e.g., years considered, language, publication status) used as criteria for eligibility, giving rationale. <i>Clearly describe eligible treatments included in the treatment network, and note whether any have been clustered or merged into the same node (with justification)</i> .                                                                                                                                                                                                                                                                                                                                                                                                      | Page 6-7                                         |
| Information sources       | 7      | Describe all information sources (e.g., databases with dates of coverage, contact with study authors to identify additional studies) in the search and date last searched.                                                                                                                                                                                                                                                                                                                                                                                                                                                                                                                                                                                                              | Page 6                                           |

|    |                                        |           |                                                                                                                                                                                                                                                                                                                                                                                                                                                   |                |
|----|----------------------------------------|-----------|---------------------------------------------------------------------------------------------------------------------------------------------------------------------------------------------------------------------------------------------------------------------------------------------------------------------------------------------------------------------------------------------------------------------------------------------------|----------------|
| 1  | Search                                 | 8         | Present full electronic search strategy for at least one database, including any limits used, such that it could be repeated.                                                                                                                                                                                                                                                                                                                     | Page 6         |
| 2  |                                        |           |                                                                                                                                                                                                                                                                                                                                                                                                                                                   |                |
| 3  |                                        |           |                                                                                                                                                                                                                                                                                                                                                                                                                                                   |                |
| 4  | Study selection                        | 9         | State the process for selecting studies (i.e., screening, eligibility, included in systematic review, and, if applicable, included in the meta-analysis).                                                                                                                                                                                                                                                                                         | Page 7         |
| 5  |                                        |           |                                                                                                                                                                                                                                                                                                                                                                                                                                                   |                |
| 6  |                                        |           |                                                                                                                                                                                                                                                                                                                                                                                                                                                   |                |
| 7  | Data collection process                | 10        | Describe method of data extraction from reports (e.g., piloted forms, independently, in duplicate) and any processes for obtaining and confirming data from investigators.                                                                                                                                                                                                                                                                        | Page 7         |
| 8  |                                        |           |                                                                                                                                                                                                                                                                                                                                                                                                                                                   |                |
| 9  |                                        |           |                                                                                                                                                                                                                                                                                                                                                                                                                                                   |                |
| 10 |                                        |           |                                                                                                                                                                                                                                                                                                                                                                                                                                                   |                |
| 11 | Data items                             | 11        | List and define all variables for which data were sought (e.g., PICOS, funding sources) and any assumptions and simplifications made.                                                                                                                                                                                                                                                                                                             | Page 6-8       |
| 12 |                                        |           |                                                                                                                                                                                                                                                                                                                                                                                                                                                   |                |
| 13 |                                        |           |                                                                                                                                                                                                                                                                                                                                                                                                                                                   |                |
| 14 | <b>Geometry of the network</b>         | <b>S1</b> | Describe methods used to explore the geometry of the treatment network under study and potential biases related to it. This should include how the evidence base has been graphically summarized for presentation, and what characteristics were compiled and used to describe the evidence base to readers.                                                                                                                                      | Page 9 & Fig 2 |
| 15 |                                        |           |                                                                                                                                                                                                                                                                                                                                                                                                                                                   |                |
| 16 |                                        |           |                                                                                                                                                                                                                                                                                                                                                                                                                                                   |                |
| 17 |                                        |           |                                                                                                                                                                                                                                                                                                                                                                                                                                                   |                |
| 18 |                                        |           |                                                                                                                                                                                                                                                                                                                                                                                                                                                   |                |
| 19 |                                        |           |                                                                                                                                                                                                                                                                                                                                                                                                                                                   |                |
| 20 |                                        |           |                                                                                                                                                                                                                                                                                                                                                                                                                                                   |                |
| 21 | Risk of bias within individual studies | 12        | Describe methods used for assessing risk of bias of individual studies (including specification of whether this was done at the study or outcome level), and how this information is to be used in any data synthesis.                                                                                                                                                                                                                            | Page 10        |
| 22 |                                        |           |                                                                                                                                                                                                                                                                                                                                                                                                                                                   |                |
| 23 |                                        |           |                                                                                                                                                                                                                                                                                                                                                                                                                                                   |                |
| 24 |                                        |           |                                                                                                                                                                                                                                                                                                                                                                                                                                                   |                |
| 25 | Summary measures                       | 13        | State the principal summary measures (e.g., risk ratio, difference in means). <i>Also describe the use of additional summary measures assessed, such as treatment rankings and surface under the cumulative ranking curve (SUCRA) values, as well as modified approaches used to present summary findings from meta-analyses.</i>                                                                                                                 | Page 8-9       |
| 26 |                                        |           |                                                                                                                                                                                                                                                                                                                                                                                                                                                   |                |
| 27 |                                        |           |                                                                                                                                                                                                                                                                                                                                                                                                                                                   |                |
| 28 |                                        |           |                                                                                                                                                                                                                                                                                                                                                                                                                                                   |                |
| 29 |                                        |           |                                                                                                                                                                                                                                                                                                                                                                                                                                                   |                |
| 30 |                                        |           |                                                                                                                                                                                                                                                                                                                                                                                                                                                   |                |
| 31 | Planned methods of analysis            | 14        | Describe the methods of handling data and combining results of studies for each network meta-analysis. This should include, but not be limited to: <ul style="list-style-type: none"> <li>• <i>Handling of multi-arm trials;</i></li> <li>• <i>Selection of variance structure;</i></li> <li>• <i>Selection of prior distributions in Bayesian analyses; and</i></li> <li>• <i>Assessment of model fit.</i></li> </ul>                            | Page 8-9       |
| 32 |                                        |           |                                                                                                                                                                                                                                                                                                                                                                                                                                                   |                |
| 33 |                                        |           |                                                                                                                                                                                                                                                                                                                                                                                                                                                   |                |
| 34 |                                        |           |                                                                                                                                                                                                                                                                                                                                                                                                                                                   |                |
| 35 |                                        |           |                                                                                                                                                                                                                                                                                                                                                                                                                                                   |                |
| 36 |                                        |           |                                                                                                                                                                                                                                                                                                                                                                                                                                                   |                |
| 37 |                                        |           |                                                                                                                                                                                                                                                                                                                                                                                                                                                   |                |
| 38 |                                        |           |                                                                                                                                                                                                                                                                                                                                                                                                                                                   |                |
| 39 |                                        |           |                                                                                                                                                                                                                                                                                                                                                                                                                                                   |                |
| 40 | <b>Assessment of Inconsistency</b>     | <b>S2</b> | Describe the statistical methods used to evaluate the agreement of direct and indirect evidence in the treatment network(s) studied. Describe efforts taken to address its presence when found.                                                                                                                                                                                                                                                   | Page 8-9       |
| 41 |                                        |           |                                                                                                                                                                                                                                                                                                                                                                                                                                                   |                |
| 42 |                                        |           |                                                                                                                                                                                                                                                                                                                                                                                                                                                   |                |
| 43 |                                        |           |                                                                                                                                                                                                                                                                                                                                                                                                                                                   |                |
| 44 | Risk of bias across studies            | 15        | Specify any assessment of risk of bias that may affect the cumulative evidence (e.g., publication bias, selective reporting within studies).                                                                                                                                                                                                                                                                                                      | Page 10        |
| 45 |                                        |           |                                                                                                                                                                                                                                                                                                                                                                                                                                                   |                |
| 46 |                                        |           |                                                                                                                                                                                                                                                                                                                                                                                                                                                   |                |
| 47 | Additional analyses                    | 16        | Describe methods of additional analyses if done, indicating which were pre-specified. This may include, but not be limited to, the following: <ul style="list-style-type: none"> <li>• Sensitivity or subgroup analyses;</li> <li>• Meta-regression analyses;</li> <li>• <i>Alternative formulations of the treatment network; and</i></li> <li>• <i>Use of alternative prior distributions for Bayesian analyses (if applicable).</i></li> </ul> | Page 7-9       |
| 48 |                                        |           |                                                                                                                                                                                                                                                                                                                                                                                                                                                   |                |
| 49 |                                        |           |                                                                                                                                                                                                                                                                                                                                                                                                                                                   |                |
| 50 |                                        |           |                                                                                                                                                                                                                                                                                                                                                                                                                                                   |                |
| 51 |                                        |           |                                                                                                                                                                                                                                                                                                                                                                                                                                                   |                |
| 52 |                                        |           |                                                                                                                                                                                                                                                                                                                                                                                                                                                   |                |
| 53 |                                        |           |                                                                                                                                                                                                                                                                                                                                                                                                                                                   |                |
| 54 |                                        |           |                                                                                                                                                                                                                                                                                                                                                                                                                                                   |                |
| 55 |                                        |           |                                                                                                                                                                                                                                                                                                                                                                                                                                                   |                |
| 56 |                                        |           |                                                                                                                                                                                                                                                                                                                                                                                                                                                   |                |
| 57 |                                        |           |                                                                                                                                                                                                                                                                                                                                                                                                                                                   |                |
| 58 |                                        |           |                                                                                                                                                                                                                                                                                                                                                                                                                                                   |                |
| 59 |                                        |           |                                                                                                                                                                                                                                                                                                                                                                                                                                                   |                |
| 60 |                                        |           |                                                                                                                                                                                                                                                                                                                                                                                                                                                   |                |



## RESULTS†

|                                          |           |                                                                                                                                                                                                                                                                                                                                                                                                                                                              |                                      |
|------------------------------------------|-----------|--------------------------------------------------------------------------------------------------------------------------------------------------------------------------------------------------------------------------------------------------------------------------------------------------------------------------------------------------------------------------------------------------------------------------------------------------------------|--------------------------------------|
| Study selection                          | 17        | Give numbers of studies screened, assessed for eligibility, and included in the review, with reasons for exclusions at each stage, ideally with a flow diagram.                                                                                                                                                                                                                                                                                              | Page 9 & Fig 1                       |
| <b>Presentation of network structure</b> | <b>S3</b> | Provide a network graph of the included studies to enable visualization of the geometry of the treatment network.                                                                                                                                                                                                                                                                                                                                            | Fig 2                                |
| <b>Summary of network geometry</b>       | <b>S4</b> | Provide a brief overview of characteristics of the treatment network. This may include commentary on the abundance of trials and randomized patients for the different interventions and pairwise comparisons in the network, gaps of evidence in the treatment network, and potential biases reflected by the network structure.                                                                                                                            | Page 9                               |
| Study characteristics                    | 18        | For each study, present characteristics for which data were extracted (e.g., study size, PICOS, follow-up period) and provide the citations.                                                                                                                                                                                                                                                                                                                 | Page 10 & Appendix table 2           |
| Risk of bias within studies              | 19        | Present data on risk of bias of each study and, if available, any outcome level assessment.                                                                                                                                                                                                                                                                                                                                                                  | Page 10 & Appendix table 3           |
| Results of individual studies            | 20        | For all outcomes considered (benefits or harms), present, for each study: 1) simple summary data for each intervention group, and 2) effect estimates and confidence intervals. <i>Modified approaches may be needed to deal with information from larger networks.</i>                                                                                                                                                                                      | Page 10-11 & Appendix table 2        |
| Synthesis of results                     | 21        | Present results of each meta-analysis done, including confidence/credible intervals. <i>In larger networks, authors may focus on comparisons versus a particular comparator (e.g. placebo or standard care), with full findings presented in an appendix. League tables and forest plots may be considered to summarize pairwise comparisons.</i> If additional summary measures were explored (such as treatment rankings), these should also be presented. | Page 10-11 & Table 2                 |
| <b>Exploration for inconsistency</b>     | <b>S5</b> | Describe results from investigations of inconsistency. This may include such information as measures of model fit to compare consistency and inconsistency models, <i>P</i> values from statistical tests, or summary of inconsistency estimates from different parts of the treatment network.                                                                                                                                                              | Page 11 & Fig 4                      |
| Risk of bias across studies              | 22        | Present results of any assessment of risk of bias across studies for the evidence base being studied.                                                                                                                                                                                                                                                                                                                                                        | Page 11 & Fig 4                      |
| Results of additional analyses           | 23        | Give results of additional analyses, if done (e.g., sensitivity or subgroup analyses, meta-regression analyses, <i>alternative network geometries studied, alternative choice of prior distributions for Bayesian analyses, and so forth</i> ).                                                                                                                                                                                                              | Page 11<br>Table 4<br>Fig 4<br>Fig 5 |

**DISCUSSION**

|    |                     |    |                                                                                                                                                                                                                                                                                                                                                                                                                                |
|----|---------------------|----|--------------------------------------------------------------------------------------------------------------------------------------------------------------------------------------------------------------------------------------------------------------------------------------------------------------------------------------------------------------------------------------------------------------------------------|
| 1  |                     |    |                                                                                                                                                                                                                                                                                                                                                                                                                                |
| 2  | Summary of evidence | 24 | Summarize the main findings, including the strength of evidence for each main outcome; consider their relevance to key groups (e.g., healthcare providers, users, and policy-makers).                                                                                                                                                                                                                                          |
| 3  |                     |    |                                                                                                                                                                                                                                                                                                                                                                                                                                |
| 4  |                     |    |                                                                                                                                                                                                                                                                                                                                                                                                                                |
| 5  |                     |    |                                                                                                                                                                                                                                                                                                                                                                                                                                |
| 6  | Limitations         | 25 | Discuss limitations at study and outcome level (e.g., risk of bias), and at review level (e.g., incomplete retrieval of identified research, reporting bias). <i>Comment on the validity of the assumptions, such as transitivity and consistency. Comment on any concerns regarding network geometry (e.g., avoidance of certain comparisons).</i>                                                                            |
| 7  |                     |    |                                                                                                                                                                                                                                                                                                                                                                                                                                |
| 8  |                     |    |                                                                                                                                                                                                                                                                                                                                                                                                                                |
| 9  |                     |    |                                                                                                                                                                                                                                                                                                                                                                                                                                |
| 10 |                     |    |                                                                                                                                                                                                                                                                                                                                                                                                                                |
| 11 |                     |    |                                                                                                                                                                                                                                                                                                                                                                                                                                |
| 12 |                     |    |                                                                                                                                                                                                                                                                                                                                                                                                                                |
| 13 |                     |    |                                                                                                                                                                                                                                                                                                                                                                                                                                |
| 14 | Conclusions         | 26 | Provide a general interpretation of the results in the context of other evidence, and implications for future research.                                                                                                                                                                                                                                                                                                        |
| 15 |                     |    |                                                                                                                                                                                                                                                                                                                                                                                                                                |
| 16 |                     |    |                                                                                                                                                                                                                                                                                                                                                                                                                                |
| 17 |                     |    |                                                                                                                                                                                                                                                                                                                                                                                                                                |
| 18 | <b>FUNDING</b>      |    |                                                                                                                                                                                                                                                                                                                                                                                                                                |
| 19 | Funding             | 27 | Describe sources of funding for the systematic review and other support (e.g., supply of data); role of funders for the systematic review. This should also include information regarding whether funding has been received from manufacturers of treatments in the network and/or whether some of the authors are content experts with professional conflicts of interest that could affect use of treatments in the network. |
| 20 |                     |    |                                                                                                                                                                                                                                                                                                                                                                                                                                |
| 21 |                     |    |                                                                                                                                                                                                                                                                                                                                                                                                                                |
| 22 |                     |    |                                                                                                                                                                                                                                                                                                                                                                                                                                |
| 23 |                     |    |                                                                                                                                                                                                                                                                                                                                                                                                                                |
| 24 |                     |    |                                                                                                                                                                                                                                                                                                                                                                                                                                |
| 25 |                     |    |                                                                                                                                                                                                                                                                                                                                                                                                                                |
| 26 |                     |    |                                                                                                                                                                                                                                                                                                                                                                                                                                |
| 27 |                     |    |                                                                                                                                                                                                                                                                                                                                                                                                                                |

PICOS = population, intervention, comparators, outcomes, study design.

\* Text in italics indicates wording specific to reporting of network meta-analyses that has been added to guidance from the PRISMA statement.

† Authors may wish to plan for use of appendices to present all relevant information in full detail for items in this section.

# BMJ Open

## Effects of Five Types of Selenium Supplementation for Treatment of Kashin-Beck disease in children: A Systematic Review and Network Meta-analysis

|                                 |                                                                                                                                                                                                                                                                                                                                                                                                                                                                                                                                                                                                                                     |
|---------------------------------|-------------------------------------------------------------------------------------------------------------------------------------------------------------------------------------------------------------------------------------------------------------------------------------------------------------------------------------------------------------------------------------------------------------------------------------------------------------------------------------------------------------------------------------------------------------------------------------------------------------------------------------|
| Journal:                        | <i>BMJ Open</i>                                                                                                                                                                                                                                                                                                                                                                                                                                                                                                                                                                                                                     |
| Manuscript ID                   | bmjopen-2017-017883.R4                                                                                                                                                                                                                                                                                                                                                                                                                                                                                                                                                                                                              |
| Article Type:                   | Research                                                                                                                                                                                                                                                                                                                                                                                                                                                                                                                                                                                                                            |
| Date Submitted by the Author:   | 16-Jan-2018                                                                                                                                                                                                                                                                                                                                                                                                                                                                                                                                                                                                                         |
| Complete List of Authors:       | Xie, Dongmei; West China Hospital, Sichuan University, Department of Geriatrics<br>Liao, Yulin; West China Hospital, Sichuan University, Department of Geriatrics<br>Yue, Jirong; West China Hospital, Sichuan University, Department of Geriatrics<br>Zhang, Chao; Taihe Hospital, Hubei University of Medicine, Center for Evidence-based Medicine and Clinical Research<br>Wang, Yanyan; West China Hospital, Sichuan University, Department of Geriatrics<br>Deng, Chuanyao; West China Hospital, Sichuan University, Department of Geriatrics<br>Chen, Ling; West China Hospital, Sichuan University, Department of Geriatrics |
| <b>Primary Subject Heading</b>: | Evidence based practice                                                                                                                                                                                                                                                                                                                                                                                                                                                                                                                                                                                                             |
| Secondary Subject Heading:      | Complementary medicine, Evidence based practice, Medical management, Nutrition and metabolism                                                                                                                                                                                                                                                                                                                                                                                                                                                                                                                                       |
| Keywords:                       | Kashin-Beck disease, Selenium supplementation, Network meta-analysis, Randomized controlled trial                                                                                                                                                                                                                                                                                                                                                                                                                                                                                                                                   |
|                                 |                                                                                                                                                                                                                                                                                                                                                                                                                                                                                                                                                                                                                                     |

SCHOLARONE™  
Manuscripts

1  
2  
3  
4 **Effects of Five Types of Selenium Supplementation for Treatment**  
5 **of Kashin-Beck disease in children: A Systematic Review and**  
6 **Network Meta-analysis**  
7  
8  
9

10 **Running title: Selenium Supplementation for Treatment of KBD**

11 Dongmei Xie, Yulin Liao, Jirong Yue, Chao Zhang, Yanyan Wang, Chuanyao Deng, Ling  
12 Chen  
13  
14  
15

16  
17 **Dongmei Xie BS<sup>a</sup>**

18 Department of Geriatrics, West China Hospital, Sichuan University  
19 No. 37, Guo Xue Xiang, Chengdu, Sichuan, CHINA  
20  
21  
22

23  
24 **Yulin Liao MD<sup>a</sup>**

25 Department of Geriatrics, West China Hospital, Sichuan University  
26 No. 37, Guo Xue Xiang, Chengdu, Sichuan, CHINA  
27  
28  
29

30 **Jirong Yue, MD (corresponding author)<sup>b</sup>**

31 Department of Geriatrics, West China Hospital, Sichuan University  
32 No. 37, Guo Xue Xiang, Chengdu, Sichuan, CHINA  
33  
34  
35

36 Email: [yuejirong11@hotmail.com](mailto:yuejirong11@hotmail.com)  
37  
38  
39

40 **Chao Zhang, MD<sup>b</sup>**

41 Center for Evidence-Based Medicine and Clinical Research, Taihe Hospital  
42 Hubei University of Medicine, Shiyan 442000, Hubei Province, China  
43  
44  
45  
46  
47  
48  
49  
50  
51  
52  
53  
54  
55  
56  
57  
58  
59  
60

51 **Yanyan Wang PHD**

52 Department of Geriatrics, West China Hospital, Sichuan University  
53 No. 37, Guo Xue Xiang, Chengdu, Sichuan, CHINA  
54  
55  
56  
57  
58  
59  
60

1  
2  
3  
4  
5  
6 **Chuanyao Deng BS**

7 Department of Geriatrics, West China Hospital, Sichuan University  
8  
9 No. 37, Guo Xue Xiang, Chengdu, Sichuan, CHINA  
10

11  
12  
13 **Ling Chen BS**

14 Department of Geriatrics, West China Hospital, Sichuan University  
15  
16 No. 37, Guo Xue Xiang, Chengdu, Sichuan, CHINA  
17

18  
19 <sup>a</sup> Dongmei Xie and Yulin Liao contributed equally to this article.  
20

21 <sup>b</sup> Jirong Yue and Chao Zhang contributed equally to this article  
22  
23  
24  
25  
26  
27  
28  
29  
30  
31  
32  
33  
34  
35  
36  
37  
38  
39  
40  
41  
42  
43  
44  
45  
46  
47  
48  
49  
50  
51  
52  
53  
54  
55  
56  
57  
58  
59  
60

## Abstract

**Objective:** To compare the effectiveness of five kinds of selenium supplementation for the treatment of patients with Kashin-Beck disease (KBD), and rank these selenium supplementation based on their performance.

**Design:** We searched for all publications between January 1, 1966 and March 31, 2017 using seven electronic databases. GRADE system to NMAs was applied to rate the quality of the evidence. We conducted a random effects model network meta-analysis in STATA to determine comparative effectiveness of each intervention. Rankings were obtained by using the surface under the cumulative ranking curve (SUCRA) values and mean ranks.

**Results:** A total of 15 randomized controlled trials involving 2931 patients were included. After assessment of the overall quality of the evidence, we downgraded our primary outcomes from high to low or very low quality. Network meta-analyses showed that all five kinds of selenium supplementation had higher metaphysis X-ray improvement which were superior to placebo. Ranking on efficacy indicated that selenium salt was ranked the highest, followed by sodium selenite + vitamin E, selenium enriched yeast, sodium selenite and then sodium selenite + vitamin C.

**Conclusions:** Based on the results of network meta-analysis, all five types of selenium supplements are more effective than placebo and so that selenium supplementation is of help in repairing metaphyseal lesions. Since the overall quality of the evidence was low or very low, the SUCRA values may be misleading and should be considered jointly with the GRADE confidence in the estimates for each comparison. The quality of the evidence is insufficient to draw a conclusion about what method of selenium supplementation is most effective.

**Trial registration number:** CRD42016051874

**Keywords:** Kashin-Beck disease; Selenium supplementation; Network meta-analysis; Randomized controlled trial

**Strengths of this study:**

- The present NMA integrated evidence from direct and indirect comparisons. We applied GRADE system to NMAs based GRADE working group to rate the quality of the evidence.
- We comprehensively summarized all RCTs of selenium supplements for KBD.

**Potential limitations:**

- Despite our exhaustive search, only 15 RCTs conducted in China were included in this review. Some trials may have been published in local journals that were missed in our search.
- The overall quality of the evidence was low or very low. The SUCRA values may be misleading and should be considered jointly with the GRADE confidence in the estimates for each comparison.

## Introduction

Kashin-Beck disease (KBD) is an endemic, chronic, disabling degenerative disorder of peripheral joints and spine<sup>1,2</sup>. It is present primarily among people in southeast Siberia, north Korea, and China<sup>3</sup>. KBD is prevalent in 377 counties of 14 provinces in China, with 0.64 million cases<sup>4</sup>. KBD occurs in childhood and includes alterations in the epiphyseal plate and metaphysis. This leads to a variety of complications, such as bony deformity, joints enlargement, growth retardation and functional impairment in multiple joints, which is a significant human and social economically problem for all individuals involved. Moreover, KBD can also cause disruptive cartilage metabolism, lipid peroxidation, and disturb the metabolism of selenium and sulfur<sup>5,6</sup>. Because of the incomplete ability of the cartilage to repair itself, only few therapies are available to treat KBD. For example, non-steroidal anti-inflammatory drugs<sup>7</sup>, sodium hyaluronate<sup>8</sup>, physical therapy<sup>9</sup>, and chondroitin sulfate combined with glucosamine are an option<sup>10</sup>. Moreover, orthopaedists have demonstrated that surgery to repair joint defects is beneficial<sup>11,12</sup>.

Although the etiology of KBD is multifactorial, one of the major environmental risk factors is selenium deficiency<sup>13</sup>. Since the 1970s, selenium was administered in several severely endemic regions. A meta-analysis study consisting of 5 randomized control trials (RCTs) as well as 10 non-RCTs demonstrated benefits of selenium administration in preventing KBD in children<sup>14</sup>. Another systematic review suggested that sodium selenite (Se) was effective for the treatment of patients already affected with KBD<sup>15</sup>. Besides Se tablet, there are other selenium supplements used for treating KBD, including selenium salts (Se salt), selenium enriched yeast (Se yeast), combining sodium selenite and vitamin E (Se + VE), as well as combining sodium selenite and vitamin C (Se + VC). At the time of our review, there were few head-to-head comparisons of different types of selenium supplement for treatment of KBD.



1  
2  
3  
4 In light of the need for government policy makers and clinical care workers to know the ef-  
5  
6 fects of a set of alternative options, a systematic review and network meta-analysis (NMA)  
7  
8 was performed. This study aimed at comparing the effectiveness of administration of seleni-  
9  
10 um in treating KBD patients, and rank these selenium supplementation based on their per-  
11  
12 formance.  
13  
14  
15

## 16 17 **Method**

18  
19 In this study, a protocol was devised according to PRISMA guidelines. The protocol was  
20  
21 registered on PROSPERO, and the trial registration number was CRD42016051874.  
22  
23

### 24 *Search strategy*

25  
26 We searched all the literature from January 1, 1966 to March 31, 2017. In our study we  
27  
28 used electronic databases, included EMBASE, MEDLINE, The Cochrane Database of Sys-  
29  
30 tematic Reviews, The Cochrane Central Register of Controlled Trials, The Chinese Biomed-  
31  
32 ical Database, Chinese National Knowledge Infrastructure, Chinese Science and Technique  
33  
34 Journals Database, and the Wan Fang database. Key words used in our search criteria includ-  
35  
36 ed: Kashin-Beck disease, big bone disease, Urov disease, endemic osteoarthritis, as well as:  
37  
38 selenium, sodium selenite, and Se. Appendix box 1 presents the Ovid search strategy used.  
39  
40 For identification of additional studies of interest, references from publications were manual-  
41  
42 ly screened.  
43  
44

### 45 *Eligibility criteria*

46  
47 We included all randomized, controlled trials (RCTs) that used Se tablet and other types  
48  
49 of selenium supplements including Se salt, Se yeast, Se + VE, as well as Se + VC for KBD  
50  
51 patients. The control groups included placebo or no treatment controls, or other active medi-  
52  
53 cines. The diagnostic criteria used for KBD was based on the Diagnosis Criteria for Kashin-  
54  
55  
56  
57  
58  
59  
60

1  
2  
3  
4 Beck Disease (GB16003-1995), which was developed by the National Health and Family  
5  
6 Planning Commission of China<sup>16</sup>. We excluded the following studies: (1) studies with small  
7  
8 sample sizes (numbers of patients less than 20 in each treatment group); (2) preventive stud-  
9  
10 ies; (3) studies without available information of interest. The studies in which individuals  
11  
12 with and without KBD were enrolled only if the therapeutic effect data could be extracted.  
13  
14 Outcome of interest to this review was the rate of repair of metaphyseal lesions using X-ray  
15  
16 film. Typically, repair was defined as being cured basically or improved significantly of met-  
17  
18 aphyseal lesions according to the latest judgment standard of X-ray for treatment effect of  
19  
20 KBD<sup>17</sup>.

### 21 22 23 ***Data extraction and quality evaluation***

24  
25 Two authors (Y. L & D. X) independently screened all citations identified by the searches.  
26  
27 Full-text articles of potential studies were obtained and assessed according to the aforemen-  
28  
29 tioned inclusion criteria. The data extraction form included publication (first author, year of  
30  
31 publication), demographics (sample size and age), interventions (dose, administration route,  
32  
33 and length of therapy), the follow-up period, as well as outcomes. To determine the overall  
34  
35 odds ratio (OR), data was extracted to the closest 12 months because this time point was re-  
36  
37 ported in all included RCTs. Two reviewers independently evaluated the methodological  
38  
39 quality of individual study according the Cochrane risk-of-bias tool<sup>18</sup>. In our review, we ap-  
40  
41 plied the GRADE system to our NMA based on the GRADE working group<sup>19</sup>. The methods  
42  
43 of rating the quality of direct comparison are the same for GRADE in traditional meta-  
44  
45 analysis. Evidence was downgraded by one level from “high quality” for significant (or by  
46  
47 two levels for very significant), study limitations (risk of bias), indirect of evidence, incon-  
48  
49 consistency, imprecision of effects, or potential bias in publication. The rating of quality of indi-  
50  
51 rect estimates was based on the ratings of the two pair-wise estimates that contributes to the  
52  
53  
54  
55  
56  
57  
58  
59  
60

1  
2  
3  
4 indirect estimate of the comparison of interest. The lower rating score of direct comparisons  
5  
6 comprise the confidence score of indirect comparison. When direct and indirect evidence  
7  
8 were available, the highest score was used as a quality score for NMA assessment<sup>19</sup>. In addi-  
9  
10 tion, we needed to consider the intransitivity among different groups and the inconsistency  
11  
12 between direct comparison and indirect comparison. Furthermore, we used the GRADE pro-  
13  
14 filer to help us create "Summary of findings" tables. In case of a discrepancy, an additional  
15  
16 experienced rater was consulted (J.Y).

### 17 18 19 ***Statistical analysis***

20  
21 As the repair rate of metaphyseal lesions on X-ray film, the outcome of interest in this  
22  
23 text, was a discontinuous statistics, we calculated the OR and its 95% confidence intervals  
24  
25 (CI) as the effect estimates. The reason why OR were used instead of Risk Ratios (RR) was  
26  
27 as follows: the inferential fallacies by using RR in indirect comparison offers the possibility  
28  
29 for abuse regarding choice when outlining outcomes and confound the decision making pro-  
30  
31 cess in which both data sets are shown. ORs can overcome this misconception, and dependa-  
32  
33 bly interprets regarding treatment effect direction in indirect comparisons<sup>20</sup>. Initially, we per-  
34  
35 formed standard pair-wise meta-analyses for all available direct comparisons using a random  
36  
37 effects model in Revman 5.3. Statistical heterogeneity of treatment effects across studies was  
38  
39 assessed by the Cochrane Q test, and the extent of between-study heterogeneity was quanti-  
40  
41 fied by  $I^2$ , of which with a value >50% indicates significant heterogeneity. Then, to estimate  
42  
43 the efficiency of each intervention, a random effects model NMA was performed in STATA  
44  
45 by conducting a network command and self-programmed STATA, which can be found at  
46  
47 <http://www.mtm.uoi.gr>. We present the mean effect sizes for the network estimates (OR)  
48  
49 along with their 95% confidence intervals (CI) and prediction intervals (PrI). The PrI shows  
50  
51 the predicted parameter around estimated treatment effects in the future study.  
52  
53  
54  
55  
56  
57  
58  
59  
60

1  
2  
3  
4 To evaluate consistency within a network, a 'design-by-treatment' model was used, as per-  
5 formed by Higgins et al., by using the network meta command in STATA. This approach ac-  
6 counted for several causes of inconsistency, which may have occurred when studies with dif-  
7 ferent designs (two-arm trials vs. three-arm trials) give different results as well as disagree-  
8 ment between direct and indirect evidence<sup>21</sup>. In this study, the chi-square test was used to de-  
9 termine any inconsistency within the network, and  $P > 0.05$  indicated that the direct and indi-  
10 rect comparisons within the network were consistent.  
11  
12  
13  
14  
15  
16  
17  
18

19 We also estimated the ranking probabilities for all treatment methods at each possible rank.  
20 Rankings were obtained by the surface under the cumulative ranking curve (SUCRA) values  
21 as well as mean ranks. SUCRA could be presented as a percentage of effectiveness of a  
22 treatment method that would be ranked first without hesitation. To derive these SUCRA val-  
23 ues we used the ranking probabilities estimated from the mvmeta command.  
24  
25  
26  
27  
28  
29

## 30 **Results**

### 31 *Study inclusion and characteristics*

32  
33 Initial searches yielded 1686 citations. Of these, 1645 duplicate or irrelevant records were  
34 excluded and full-text articles of the remaining 41 studies were retrieved for further assess-  
35 ment according to the inclusion criteria. A total of 15 studies<sup>22-36</sup> containing 2931 patient were  
36 included eventually in our meta-analysis (Fig 1). We excluded 26 trials for the reasons docu-  
37 mented in the Characteristics of excluded studies table (Appendix Table 1).  
38  
39  
40  
41  
42  
43  
44

45 A total of seven interventions were evaluated: Se, Se salt, Se yeast, Se + VE, Se + VC, VC,  
46 and placebo. Figure 2 shows the network of all treatment comparisons included in this review.  
47 The age of participants range from 2 to 16 years old and the duration of follow-up varied  
48 from 6 months to 36 months. The main characteristics of the included studies were similar,  
49 and the characteristics (e.g. interventions dosage, route of administration, duration of treat-  
50  
51  
52  
53  
54  
55  
56  
57  
58  
59  
60

ment, the follow-up period, and outcomes) are presented in the online supplementary Appendix Table 2.

### ***Overall assessment for evidence quality***

All included trials were reported to be RCTs. The quality of included studies was overall low. Study quality for each study can be seen in Appendix Table 3. We downgraded this outcome from high to low or very low quality for possible bias, inconsistency, or imprecision. Overall assessment for evidence quality was seen in Table 1.

**Table 1 Quality ratings for comparison of different interventions**

| Comparison           | Quality of direct evidence | Quality of indirect evidence | Quality of network meta-analysis evidence |
|----------------------|----------------------------|------------------------------|-------------------------------------------|
| Se vs. placebo       | Low*,†                     | Low*,#                       | Low*,†                                    |
| Se salt vs. placebo  | Low*,†                     | Low*,#,                      | Low*,†                                    |
| Se+VC vs. placebo    | Moderate*                  | Low*,#                       | Moderate*                                 |
| Se+VE vs. placebo    | Very low*,†,‡              | Low*,#                       | Low*,#                                    |
| Se yeast vs. placebo | Moderate*                  | Low*,#                       | Moderate*                                 |
| VC vs. placebo       | Moderate*                  | Low*,#                       | Moderate*                                 |
| Se salt vs. Se       | —                          | Very low*,‡,¶                | Very low*,‡,¶                             |
| Se+VC vs. Se         | Moderate*                  | Low*,‡                       | Moderate*                                 |
| Se+VE vs. Se         | —                          | Very low*,‡,¶                | Very low*,‡,¶                             |
| Se yeast vs. Se      | Moderate*                  | Very low*,‡,¶                | Moderate*                                 |
| VC vs. Se            | Moderate*                  | Low*,¶                       | Moderate*                                 |
| Se+VC vs. Se salt    | Low*,‡                     | Low*,¶                       | Low*,¶                                    |
| Se+VE vs. Se salt    | —                          | Very low*,‡,¶                | Very low*,‡,¶                             |
| Se yeast vs. Se salt | —                          | Very low*,‡,¶                | Very low*,‡,¶                             |
| VC vs. Se salt       | Low*,‡                     | Very low*,‡,¶                | Low*,¶                                    |
| Se+VE vs. Se+VC      | —                          | Very low*,‡,¶                | Very low*,‡,¶                             |
| Se yeast vs. Se+VC   | —                          | Very low*,‡,¶                | Very low*,‡,¶                             |
| VC vs. Se+VC         | Moderate*                  | Very low*,‡,¶                | Moderate*                                 |
| Se yeast vs. Se+VE   | —                          | Very low*,‡,¶                | Very low*,‡,¶                             |
| VC vs. Se+VE         | —                          | Very low*,‡,¶                | Very low*,‡,¶                             |

|                 |   |                  |                  |
|-----------------|---|------------------|------------------|
| VC vs. Se yeast | — | Very low*,‡,¶,¶¶ | Very low*,‡,¶,¶¶ |
|-----------------|---|------------------|------------------|

\*Limitations (risk of bias). †Inconsistency. ‡Imprecision. #Inconsistency for indirect evidence: prediction intervals for treatment effect include effects that would have different interpretations. ¶Indirectness: no convincing evidence for the plausibility of the transitivity assumption.

Se = Sodium selenite, Se salt = selenium salt, VC = vitamin C, Se + VC = the combination of sodium selenite with vitamin C ; Se + VE = the combination of sodium selenite with vitamin E, Se yeast = selenium enriched yeast

### ***Intervention-control pair-wise meta-analyses***

All RCTs reported repair rate of metaphyseal lesions on X-ray films. The individual study data used in the analyses were listed in appendix Table 4. Follow-up duration of included RCTs were varied. We extracted data to the nearest 12 months to estimate the overall OR. When compared to placebo, the pooled OR (random effects model) of X-ray improvement was in favor of Se (OR 5.0, 95% CI: 3.21 - 7.78,  $P < 0.001$ ,  $I^2 = 70\%$ ), Se salt (OR 7.6, 95% CI: 2.34 - 24.67,  $P = 0.001$ ), Se enriched yeast (OR 3.75, 95% CI: 1.76 - 8.02,  $P = 0.001$ ), and Se + VE (OR 11.05, 95% CI: 2.61 - 46.80,  $P = 0.03$ ,  $I^2 = 60\%$ ) respectively, which indicated that repairing rate of metaphyseal lesions on X-ray films was significantly higher for these drugs than placebo (See Appendix figure) . Summary of findings for each selenium supplements compare to placebo was seen in Table 2. A few RCTs reported direct comparisons among active interventions. There were two RCTs compared Se with VC, the pooled OR of two RCTs also showed no significant difference existed (OR 1.15, 95% CI: 0.51 – 2.63,  $P=0.93$ ,  $I^2 = 0\%$ )<sup>25,35</sup>. There was only one RCT for Se vs. Se yeast<sup>28</sup>, Se vs. Se +VC<sup>33</sup>, Se salt vs. Se + VC<sup>33</sup>, Se salt vs. VC<sup>33</sup>, respectively. OR of X-ray improvement was significantly higher in Se salt group compared with Se + VC (OR 6.00, 95% CI: 1.81 - 19.93,  $P=0.003$ ) and VC alone (OR 4.24, 95% CI: 1.39 - 12.90,  $P=0.011$ ). There were no significant differences noted in other active interventions comparisons (See Table 3).

Table 2 Summary of findings for each intervention in comparison to placebo

| <b>Patient or population:</b> Children with Kashin-Beck disease<br><b>Outcomes:</b> Improvement of metaphyseal lesions on X-ray<br><b>Intervention:</b> Se, Se salt, Se yeast, Se + VE, Se + VC, VC<br><b>Comparison:</b> placebo |                                           |                                 |                                                                          |       |                                                                 |                                                                              |
|-----------------------------------------------------------------------------------------------------------------------------------------------------------------------------------------------------------------------------------|-------------------------------------------|---------------------------------|--------------------------------------------------------------------------|-------|-----------------------------------------------------------------|------------------------------------------------------------------------------|
| Intervention/<br>Comparison:                                                                                                                                                                                                      | Anticipated absolute effects*<br>(95% CI) |                                 | Relative effect<br>(95% CI)<br>(based on net-<br>work meta-<br>analysis) | SUCRA | No of partic-<br>ipants<br>(studies<br>with direct<br>evidence) | Quality of the<br>evidence based<br>on network me-<br>ta-analysis<br>(GRADE) |
|                                                                                                                                                                                                                                   | Repair rate<br>with placebo               | Repair rate<br>with Se          |                                                                          |       |                                                                 |                                                                              |
| Se salt vs.<br>placebo                                                                                                                                                                                                            | 34 per 100                                | <b>87 per 100</b><br>(60 to 97) | <b>OR 12.37</b><br>(2.81 to 54.41)                                       | 86.0% | 59<br>(1 RCT)                                                   | ⊕⊕○○<br>LOW <sup>a,c</sup>                                                   |
| Se+VE vs.<br>placebo                                                                                                                                                                                                              | 45 per 100                                | <b>90 per 100</b><br>(72 to 97) | <b>OR 10.72</b><br>(3.14 to 36.57)                                       | 82.8% | 145<br>(2 RCTs)                                                 | ⊕⊕○○<br>LOW <sup>a,c</sup>                                                   |
| Se yeast vs.<br>placebo                                                                                                                                                                                                           | 38 per 100                                | <b>78 per 100</b><br>(51 to 93) | <b>OR 5.81</b><br>(1.70 to 19.89)                                        | 62.5% | 120<br>(1 RCT)                                                  | ⊕⊕⊕○<br>MODERATE <sup>a</sup>                                                |
| Se vs. placebo                                                                                                                                                                                                                    | 42 per 100                                | <b>77 per 100</b><br>(69 to 84) | <b>OR 4.68</b><br>(2.99 to 7.34)                                         | 52.5% | 2427<br>(11 RCTs)                                               | ⊕⊕○○<br>LOW <sup>a,b</sup>                                                   |
| Se+VC vs.<br>placebo                                                                                                                                                                                                              | 34 per 100                                | <b>63 per 100</b><br>(38 to 83) | <b>OR 3.26</b><br>(1.14 to 9.28)                                         | 35.7% | 54<br>(1 RCT)                                                   | ⊕⊕⊕○<br>MODERATE <sup>a</sup>                                                |
| VC vs. place-<br>bo                                                                                                                                                                                                               | 34 per 100                                | <b>61 per 100</b><br>(40 to 79) | <b>OR 3.05</b><br>(1.29 to 7.20)                                         | 30.1% | 124<br>(2 RCTs)                                                 | ⊕⊕⊕○<br>MODERATE <sup>a</sup>                                                |

\*The repair rate in the intervention group (and its 95% confidence interval) is based on the assumed rate in the comparison group and the relative effect of the intervention (and its 95% CI).

CI: Confidence interval; OR: Odds ratio

#### GRADE Working Group grades of evidence

**High quality:** We are very confident that the true effect lies close to that of the estimate of the effect

**Moderate quality:** We are moderately confident in the effect estimate: The true effect is likely to be close to the estimate of the effect, but there is a possibility that it is substantially different

**Low quality:** Our confidence in the effect estimate is limited: The true effect may be substantially different from the estimate of the effect

**Very low quality:** We have very little confidence in the effect estimate: The true effect is likely to be substantially different from the estimate of effect

a. Limitations (risk of bias): no studies described adequate methods regarding the sequence of randomization and reported allocation concealment. Some studies did not use of a blinding method and ITT analysis.

b. Inconsistency: small sample size or have a higher I<sup>2</sup>, or both.

c. Imprecision: the effects are large but the overall sample size are low.

Se = Sodium selenite, Se salt = selenium salt, VC = vitamin C, Se + VC = the combination of sodium selenite with vitamin C ;

Se + VE = the combination of sodium selenite with vitamin E, Se yeast = selenium enriched yeast

**Table 3 Results of pair-wise and network meta-analyses of repairing rate of metaphyseal lesions on X-ray films**

| <b>OR<br/>(95%CI) #</b> | <b>Placebo</b>                                  | <b>Se</b>                                  | <b>Se salt</b>                             | <b>Se + VC</b>                             | <b>Se + VE</b>      | <b>Se yeast</b>    |
|-------------------------|-------------------------------------------------|--------------------------------------------|--------------------------------------------|--------------------------------------------|---------------------|--------------------|
| <b>Se</b>               | 4.68 (2.99 to 7.34)*<br>5.00 (3.21 to 7.78)     | -                                          | -                                          | -                                          | -                   | -                  |
| <b>Se salt</b>          | 12.37 (2.81 to 54.41)*<br>7.60 (2.34 to 24.67)  | 2.64 (0.59 to 11.84)                       | -                                          | -                                          | -                   | -                  |
| <b>Se + VC</b>          | 3.26 (1.14 to 9.28)*<br>1.27 (0.42 to 3.83)     | 0.70 (0.25 to 1.97)<br>1.30 (0.57 to 2.94) | 0.26 (0.06 to 1.20)<br>0.17 (0.05 to 0.55) | -                                          | -                   | -                  |
| <b>Se + VE</b>          | 10.72 (3.14 to 36.57)*<br>11.05 (2.61 to 46.80) | 2.29 (0.62 to 8.43)                        | 0.87 (0.13 to 5.93)                        | 3.29 (0.65 to 16.53)                       | -                   | -                  |
| <b>Se yeast</b>         | 5.81 (1.70 to 19.89)*<br>3.75 (1.76 to 8.02)    | 1.24 (0.36 to 4.25)<br>1.92 (0.90 to 4.00) | 0.47 (0.07 to 3.16)                        | 1.78 (0.37 to 8.66)                        | 0.54 (0.10 to 3.08) | -                  |
| <b>VC</b>               | 3.05 (1.29 to 7.20)*<br>2.02 (0.98 to 4.17)     | 0.65 (0.28 to 1.53)<br>0.95 (0.51 to 1.79) | 0.25 (0.06 to 1.06)<br>0.24 (0.08 to 0.72) | 0.94 (0.34 to 2.56)<br>0.87 (0.38 to 1.96) | 0.28 (0.06 to 1.27) | 0.52(0.12 to 2.27) |

# ORs represent odds of repair in row-treatment versus column-treatment. ORs larger than 1 denote higher repair rate in row-treatment than column-treatment. In each cell, the first line represents the result of network meta-analyses, and the second row represents the result of pair-wise meta-analyses. OR = Odds ratio, CI = Confidence intervals, Se = Sodium selenite, Se salt = selenium salt, VC = vitamin C, Se + VC = the combination of sodium selenite with vitamin C ; Se + VE = the combination of sodium selenite with vitamin E, Se yeast = selenium enriched yeast



### ***Results of network meta-analyses and consistency test***

The pooled OR and 95% CI of X-ray improvement for active treatment compared with placebo was 4.68 (2.99 to 7.34) for Se, 12.37 (2.81 to 54.41) for Se salt, 5.81 (1.70 to 19.89) for Se enriched yeast, 10.72 (3.14 to 36.57) for Se + VE, and 3.26 (1.14 to 9.28) for Se + VC respectively, which indicated a significant difference in efficacy. For the comparison between active treatments, no significant differences were found. More details were presented in Table 3. In Figure 3, we presented the OR for the network estimates along with 95% CI and PrI.

There was no inconsistency between direct and indirect evidences according to the design-by-treatment interaction model ( $P=0.88$ ), implying that direct and indirect evidence were mainly consistent (Fig 4). However, the results of the comparison of Se + VC and VC versus placebo showed some degree of inconsistency. Actually, the lower CI for X-ray improvement were nearly equal to 1 (1.13 for Se + VC and 1.27 for VC), showing a trend to coincide with direct results.

Table 2 and Fig 5 displayed the distribution of probabilities for each treatment being ranked for their efficacy in KBD according the SUCRA values.

## **Discussion**

### ***Principal findings***

Our NMA of all 15 available RCTs in 2931 patients with KBD showed that all five kinds of selenium supplementation (including Se, Se salt, Se enriched yeast, Se + VE, Se + VC) were superior to placebo/no treatment in repairing metaphyseal lesions. There was uncertainty around the difference between two active treatments. However, the probabilistic ranking of interventions showed that Se salt was ranked the most effective, followed by Se + VE, Se enriched yeast, Se and then Se + VC.

### *Relation to other studies*

Studies have proposed that a deficiency in selenium is key in disposing target cells, such as chondrocytes, to oxidative stress<sup>37</sup>. In most highly endemic area, the level of total soil selenium concentrations is typically low. In a previous study, it was demonstrated that in endemic regions, selenium concentrations in water, soil, cereal, and corn were reduced compared to regions without high rates of KBD<sup>38</sup>. Furthermore, the majority of individuals who live in areas with KBD have a low selenium nutritive status, as is indicated by the low levels of selenium in their serum, red blood cell, urine, and hair.

The effectiveness of various methods of selenium supplementation for children has been demonstrated by many studies including Se salt<sup>39</sup>, Se enriched yeast<sup>28</sup>, oral sodium selenite tablet<sup>17</sup>, spraying Se on crops<sup>40</sup>, and Se enriched fertilizer<sup>41</sup>. Selenium supplementation was related to a reduced KBD prevalence, along with an increased selenium content the hair of individuals who living in areas with KBD. It was reported that the incidence of radiographic evidence of metaphysical lesions of the hands was 44.8% in 1990 at Cuimu town of the Shaanxi province in children aged 7~12 years. After implementation of comprehensive prevention measures of KBD, especially using Se salt, the incidence these x-ray findings decreased to 0.3% in 2010<sup>42</sup>. The low incidence of KBD also may explain why there has not been any studies about Se treatment for KBD published in recent years.

Se salt was produced as follows: a total of 0.833 g sodium selenite powder was added to 50 kg source salt and expanded to 1:60,000 of Se salt. Although administration of Se tablet is effective for prevention and treatment of KBD in children<sup>16,17</sup>, it is very difficult for many children who reside in endemic areas to adhere to any type of long-term medication. However, salt is a necessary part of daily life and food intake. The compliance can be more effec-

1  
2  
3  
4 tively guaranteed. A limitation to the findings about Se salt is that due to the difficulty of car-  
5 rying out a RCT comparing Se salt with placebo or other active drugs, only one RCT has  
6 been done<sup>33</sup>. However, one meta-analysis involving 11 non-RCTs (2652 participants) also  
7 showed that supplement Se salt was effective for preventing and treatment for KBD in Chil-  
8 dren<sup>39</sup>. Since Se salt is the most economical way for low-income families, it is anticipated  
9 that continuous use of Se salt and other comprehensive prevention approaches could be bene-  
10 ficial in eliminating KBD cartilage damages in children<sup>43</sup>.

11  
12  
13  
14  
15  
16  
17  
18  
19 Despite the evidence in our meta-analysis, there remains some controversy around sele-  
20 nium supplementation in relationship with iodine deficiency. In a previous study that was  
21 performed in the Tibet area, Moreno-Reyes et al. did not find a relation between KBD ad se-  
22 lenium deficiency, whereas they did identify iodine deficiency as a risk factor<sup>44</sup>. Similarly, the  
23 only RCT<sup>34</sup> published in English in our review showed only 1 case of improvements in X-ray  
24 in sodium selenite group. The above studies should, however, be interpreted with caution.  
25 These studies were all performed in the Tibet area where selenium and iodine are both defi-  
26 cient in the diet. Moreover, both Selenium and iodine deficiency are risk factors of KBD<sup>37</sup>.  
27 Previous studies have shown growth retardation in rats that were fed a diet containing low  
28 selenium levels<sup>45</sup>. In addition, impaired development of the bone was demonstrated when rats  
29 were fed a iodine deficient diet<sup>46</sup>. Supplementation with selenium may not counterbalance the  
30 negative effects of long-term iodine deficiency. Thus, it does not seem very likely that KBD  
31 has only one cause. Additional factors (both genetic and environmental) may be a protective  
32 or show disease acceleration.

### 33 ***Methodological quality of included trials***

34  
35  
36  
37  
38  
39  
40  
41  
42  
43  
44  
45  
46  
47  
48  
49  
50  
51  
52 Overall, the methodological quality of the included trails was low. In all the included tri-  
53 als, methods of randomization and allocation concealment were not presented. In 8 trials,  
54  
55  
56  
57  
58  
59  
60

1  
2  
3  
4 double-blinding was described, whereas specifics of the methods of blinding were described  
5  
6 in 3 trials. Withdrawal rates of participants were less than 20% in 8 trails. Only Six trials per-  
7  
8 formed intention to treat analysis.  
9

10 After evaluation, we downgraded the evidence quality of primary outcomes from high to  
11  
12 low or very low, because of the high risk of bias due to unclear sequence generation and allo-  
13  
14 cation concealment. Moreover, we observed very small sample sizes in several trials com-  
15  
16 bined with higher levels of heterogeneity that showed significant inconsistency between trials.  
17  
18

### 19 ***Strengths and weaknesses***

20  
21 In the current NMA, evidence was integrated from both direct and indirect comparisons.  
22  
23 The literature search strategy was extensive, and it was unlikely that relevant trials were  
24  
25 missed. The selection of trials as well as the extraction of data and quality assessments were  
26  
27 performed by two investigators to minimize bias and transcription errors. In this NMA, we  
28  
29 applied the GRADE system to NMAs based on the GRADE working group to rate the quality  
30  
31 of the evidence.  
32  
33

34 Although the results are promising, this study has several limitations. First, the length of  
35  
36 follow-up varied greatly, and varied from 6 to 36 months. However, follow-up period of most  
37  
38 studies are concentrated in 12 months. Therefore, the data in our review were extracted to the  
39  
40 nearest 12 months. Even so, the best beneficial duration of therapy period remains unclear for  
41  
42 KBD. When compared with other RCTs in osteoarthritis, 36 months of therapy might be ap-  
43  
44 propriate for detecting X-ray-related alterations of KBD. Secondly, the sample size of the  
45  
46 RCTs included in our NMA was limited. Thirdly, despite our extensive research, we were on-  
47  
48 ly able to include 15 RCTs in our NMA that were performed in China. Apart from China,  
49  
50 both North Korea and Russia have a high KBD incidence, and it is likely that in our search,  
51  
52 trials that were published in local journals may have been missed. Finally, in this study, the  
53  
54  
55  
56  
57  
58  
59  
60

1  
2  
3  
4 heterogeneity was relatively high that may be explained by a lack of allocation concealment,  
5  
6 limited number of samples, and alterations between selenium preparations. Similar as with  
7  
8 heterogeneity between trials, inconsistency between direct and indirect comparisons was  
9  
10 close to zero. Clinically relevant inconsistency cannot be ruled out, therefore there is no indi-  
11  
12 cation that clinical characteristics of enrolled subjects or additional features of the trial con-  
13  
14 founded indirect comparisons.  
15

## 16 **Conclusions**

### 17 *Implications for clinical practice*

18  
19  
20 Based on the current NMA, all types of Se supplementation were of higher efficiency  
21  
22 compared to the placebo in treating KBD in children. Ranking on efficacy indicated that Se  
23  
24 salt were highest, followed by Se + VE, Se enriched yeast, Se, Se + VC, VC, and placebo/no  
25  
26 treatment. Since the overall assessment quality was relatively low (or very low), the SUCRA  
27  
28 values may be misleading and should be considered jointly with the GRADE confidence in  
29  
30 the estimates for each comparison. Evidence quality is insufficient to draw a conclusion  
31  
32 about what method of selenium supplementation is most effective. Se salt can be an econom-  
33  
34 ical and convenient strategy for controlling KBD in endemic areas. However, selenium over-  
35  
36 dose is toxic. Therefore, suitable dosages should be strictly controlled and content of seleni-  
37  
38 um should be closely monitored to prevent detrimental health-related issues.  
39  
40  
41  
42  
43  
44

### 45 *Implications for research*

46  
47 Since KBD among children has almost disappeared, it is highly unlikely that upcoming  
48  
49 trials involve RCT to demonstrate the clinically relevant benefit of any selenium supplemen-  
50  
51 tation for children with KBD. Currently, no effective therapy exists to correct KBD-related  
52  
53 cartilage damage in adults. Novel approaches, including gene therapy and tissue engineering  
54  
55  
56  
57  
58  
59  
60

1  
2  
3  
4 may become a potential treatment strategy that can be used for treating KBD-related cartilage  
5  
6 damages.  
7  
8  
9

### 10 **Contributors**

11  
12 Dongmei Xie and Yulin Liao conceived the review question, reviewed studies for inclusion,  
13  
14 assessed the included studies, extracted data, completed the first draft, and edited the review.  
15  
16 Jirong Yue and Chao Zhang analyzed the data, did the literature search, advised and coordi-  
17  
18 nated the review development, performed part of the writing and editing of the review, ap-  
19  
20 proved the final version of the review prior to submission, and is also a guarantor. Yanyan  
21  
22 Wang, Chuanyao Deng and Ling Chen contributed to the development of the review question,  
23  
24 edited and provided intellectual contributions to the review.  
25  
26  
27  
28  
29

30 **Funding Statement:** This research was funded by China National Science & Technology  
31  
32 Pillar Program (2007BA125B04).  
33

34 **Conflict of interest:** We declare that we have no conflicts of interest.  
35

36  
37 **Role of the funding source:** The sponsors of the study had no role in study design, data col-  
38  
39 lection, data analysis, data interpretation, or writing of the report. The corresponding author  
40  
41 had full access to all the data in the study and had final responsibility for the decision to sub-  
42  
43 mit for publication.  
44

45 **Acknowledgments:** Dr. Joseph H. Flaherty is especially acknowledged for editorial review  
46  
47 and language assistance.  
48

49  
50 **Data sharing statement:** No additional data are available.  
51

### 52 **Reference:**

53  
54 1. Mathieu F, Begaux F, Lan ZY, Suetens C, Hinsenkamp M. Clinical manifestations of Kashin-  
55  
56  
57  
58  
59  
60

- 1
- 2
- 3
- 4 Beck disease in Nyemo Valley, Tibet. *Int Orthop* 1997;21:151-6.
- 5
- 6 2. Sokoloff L. The history of Kashin-Beck disease. *N Y State J Med* 1989;89:343-51.
- 7
- 8 3. Allander E. Kashin-Beck disease. An analysis of research and public health activities based on a
- 9 bibliography 1849-1992. *Scand J Rheumatol Suppl* 1994;99:1-36.
- 10
- 11 4. P. R. C. Ministry of Health. The prevention and control status of Kashin-Beck disease in 2011.
- 12 Available at: <http://www.nhfpc.gov.cn/htmlfiles/zwgkzt/ptjnj/year2012/index2012.html>;2012.
- 13
- 14 5. Xiong G. Diagnostic, clinical and radiological characteristics of Kashin-Beck disease in Shaanxi
- 15 Province, PR China. *Int Orthop* 2001;25:147-50.
- 16
- 17 6. Peng A, Yang C, Rui H, Li H. Study on the pathogenic factors of Kashin-Beck disease. *J Toxicol*
- 18 *Environ Health* 1992;35:79-90.
- 19
- 20 7. Luo R, Liu G, Liu W, Pei F, Zhou Z, Li J, et al. Efficacy of celecoxib, meloxicam and paraceta-
- 21 mol in elderly Kashin-Beck disease (KBD) patients. *International orthopaedics* 2011;35:1409-14.
- 22
- 23 8. Yu FF, Xia CT, Fang H, Han J, Younus MI, Guo X. Evaluation of the therapeutic effect of treat-
- 24 ment with intra-articular hyaluronic acid in knees for Kashin-Beck disease: A meta-analysis. *Osteoar-*
- 25 *thritis Cartilage* 2014;22:718-25.
- 26
- 27 9. Mathieu F, Suetens C, Begaux F, De Maertelaer V, Hinsenkamp M. Effects of physical therapy
- 28 on patients with Kashin-Beck disease in Tibet. *Int Orthop* 2001;25:191-3.
- 29
- 30 10. Yue J, Yang M, Yi S, Dong B, Li W, Yang Z, et al. Chondroitin sulfate and/or glucosamine hy-
- 31 drochloride for Kashin-Beck disease: a cluster-randomized, placebo-controlled study. *Osteoarthritis*
- 32 *cartilage* 2012;20:622-9.
- 33
- 34 11. Zhongmin T, Yang L, Zhou J, Gao D, Dong S, Xie J, et al. Comparison of treatment results of
- 35 arthroscopic knee debridement alone with a combination of arthroscopic debridement and drilling
- 36 decompression in knee Kashin-Beck disease (in Chinese). *Chin J Endo* 2009:371-4.
- 37
- 38 12. Liu FD, Wang ZL, Hinsenkamp M. Osteotomy at the knee for advanced cases of Kashin-Beck
- 39 disease. *Int Orthop* 1998;22:87-91.
- 40
- 41 13. Guo X, Ma WJ, Zhang F, Ren FL, Qu CJ, Lammi MJ. Recent advances in the research of an en-
- 42 demic osteochondropathy in China: Kashin-Beck disease. *Osteoarthritis Cartilage* 2014;22:1774-83.
- 43
- 44 14. Zou K, Liu G, Wu T, Du L. Selenium for preventing Kashin-Beck osteoarthropathy in children: a
- 45 meta-analysis. *Osteoarthritis Cartilage* 2009;17:144-51.
- 46
- 47 15. Jirong Y, Huiyun P, Zhongzhe Y, Birong D, Weimin L, Ming Y, et al. Sodium selenite for treat-
- 48 ment of Kashin-Beck disease in children: A systematic review of randomised controlled trials. *Osteo-*
- 49 *arthritis Cartilage* 2012;20:605-13.
- 50
- 51 16. National Health and Family Planning Commission of the People's Republic of China. Diagnostic
- 52 criteria of Kashin-Beck disease (GB16003-1995).[1995-12-15]
- 53
- 54 17. Liang S, Zhang F, Wang L, Yang Y, Lu X, Chen C. The effect of the treatment of Kashin Beck
- 55
- 56
- 57
- 58
- 59
- 60

- disease (in Chinese). *Chin J Endo* 1996;15:378-80.
18. Higgins J, Green S. *Cochrane Handbook for Systematic Reviews of Interventions (Version 5.1.0)*. The Cochrane Collaboration, 2011. Available at: <http://www.cochrane-handbook.org>.
19. Puhan MA, Schünemann HJ, Murad MH, Li T, Brignardello-Petersen R, Singh JA, et al. A GRADE Working Group approach for rating the quality of treatment effect estimates from network meta-analysis. *BMJ* 2014; 349:g5630.
20. Eckermann S, Coory M, Willan AR. Indirect comparison: relative risk fallacies and odds solution. *J Clin Epidemiol* 2009;62:1031-6.
21. Jackson D, Barrett JK, Rice S, White IR, Higgins JP. A design-by-treatment interaction model for network meta-analysis with random inconsistency effects. *Stat Med* 2014;33:3639-54.
22. Niu GH, Zhang BH, Song ZY, Pang ZG, Wang YY, Ma QH. An observation study on effect of oral sodium selenite for prevention and treatment of kashin-beck effect (in Chinese). *Heilongjiang Med J* 1981:15-7.
23. The Yongshou Scientific Survey Group of Kaschin-Beck Disease. Effect and mechanism of selenium in the prevention and cure of 424 Kaschin-Beck's patients (in Chinese). *Chin J Endemiol* 1982;1:145-50.
24. Wang DS, Fu BS, Sun QY, Yang WZ, Bao BJ, Huang FH, et al. Dynamic observation of sodium selenite and vitamin E in the treatment of Kashin Beck disease (in Chinese). *Chin J Endemiol* 1983;2:204-7.
25. Cui ZJ, Lin BH, Jin CS, Lin JZ. An observation on effect of the treatment of Kaschin-Beck disease using Vitamin C or sodium selenite (in Chinese). *End Dis Bull*;1984;1:63.
26. Niu GH, Zhang BZ, Li XZ, Liu JX, Zhu ZY, Hou SF. Results of study of two years on the preventing and controlling Kashin-Beck's disease with selenium seen under X-rays and discussion of etiology (in Chinese). *Chin J Endemiol* 1984;3:199-201.
27. Guo LB, Lu Q, Tang HF, Lei H, Dong HQ. An one year observation by X-ray on effect of the treatment of Kaschin-Beck disease using oral sodium selenite (in Chinese). *J Chengde Univ Med Sci* 1985:67-70.
28. Guo LB, Lu Q, Dong HQ, Tang HF, Lei H, Zhang ZM, et al. One year of observation on effect of selenium enriched yeast for treatment of Kaschin Beck disease (in Chinese). *Chin J Endemiol* 1986;5:16-20.
29. Niu GH, Zhang BZ, Hou SF, Zhu ZY, Li DZ, Zhong PL, et al. Study of two years on the preventing and controlling Kashin-Beck's disease with oral sodium selenite seen under X-rays (in Chinese). *J Pract Endemio* 1986;1:16-8.
30. Wu QX. An observation by X-ray on effect of the prevention and treatment of Kaschin-Beck disease using oral sodium selenite (in Chinese). *Chin J Endemiol* 1986;5:210-20.



- 1
- 2
- 3
- 4 31. Deng JY. Effect of sodium selenite oral application on Kashin-Beck disease, a three years obser-
- 5 vation (in Chinese). *Chin J Endemiol* 1988;7:117-20.
- 6
- 7 32. Niu GH, Zhang BZ, Hou SF. Effect of semis-dosage selenium on controlling of Kashin-Beck
- 8 disease (in Chinese). *Chin J Endemiol* 1990;99-100.
- 9
- 10 33. Zhou XK, Wang WL, Wang EQ, Yu AL, Ren YG, Xu JM, et al. The observation on effecto of
- 11 selenium and vitamin C for treating Kaschin Beck disease (in Chinese). *End Dis Bull* 1991:100-3.
- 12
- 13 34. Moreno-Reyes R, Mathieu F, Boelaert M, Begaux F, Suetens C, Rivera MT, et al. Selenium and
- 14 iodine supplementation of rural Tibetan children affected by Kashin-Beck osteoarthropathy. *Am J Clin*
- 15 *Nutr* 2003;78:137-44.
- 16
- 17 35. Chen Y, Huo JM, Wang ZL, Tan XW, Xue L, Geng D. A comparative research on the treatment
- 18 effect of Se supplement , Vit C supplement and cereals dryness on Kaschin -Beck disease (in Chinese).
- 19 *Chin J Endemiol* 2003;18:343-6.
- 20
- 21 36. Cai LW, Zhang YL. An observation by X-ray on effect of selenium in the treatment of 40
- 22 Kaschin-Beck children (in Chinese). *J Comm Med* 2005;3:60-1.
- 23
- 24 37. Yao Y, Pei F, Kang P. Selenium, iodine, and the relation with Kashin-Beck disease. *Nutrition*
- 25 2011;27:1095-100.
- 26
- 27 38. Wang Q, Li XX, Li L, Tian JH, Yang KH, Wu TX, et al. Correlation between selenium and
- 28 Kaschin-Beck disease: A meta-analysis (in Chinese). *Chin J Evid Based Med* 2013;13:1421-30.
- 29
- 30 39. Yu FF, Han J, Wang X, Fang H, Liu H, Guo X. Salt-Rich Selenium for Prevention and Control
- 31 Children with Kashin-Beck Disease: a Meta-analysis of Community-Based Trial. *Biol Trace Elem*
- 32 *Res* 2016;170:25-32.
- 33
- 34 40. Guo X, Ding D, Wang Z, Lv S, Zhang J, Tan X, et al. A study on the reparative action of x-ray
- 35 lesions in metaphyses and distal end of bone in children's fingers with kashin-beck disease treated by
- 36 se-fortified wheat (in Chinese). *Chin J Ctrl Endem Dis* 1990:269-72.
- 37
- 38 41. Chen D, Ren S, Lu W, Li J, Fan L, Jia Z, et al. Effect of applying selenium fertilizer to improve
- 39 soil and increase selenium level in food for prevention and treatment of Kaschin-Beck disease (in
- 40 Chinese). *J Env Sci* 1993;5:299-309.
- 41
- 42 42. Xu GY, Lu XY, Cao XG. Analysis on monitoring data of Kaschin-Beck disease in Shannxi Prov-
- 43 ince during 19 years (in Chinese). *Chin J Contr End Dis* 2009:442-6.
- 44
- 45 43. Ning Y, Wang X, Wang S, Zhang F, Zhang L, Lei Y, et al. Is it the appropriate time to stop apply-
- 46 ing selenium enriched salt in kashin-beck disease areas in China? *Nutrients* 2015;7:6195-212.
- 47
- 48 44. Moreno-Reyes R, Suetens C, Mathieu F, Begaux F, Zhu D, Rivera MT, et al. Kashin-Beck osteo-
- 49 arthropathy in rural Tibet in relation to selenium and iodine status. *N Engl J Med* 1998;339:1112-20.
- 50
- 51 45. Sasaki S, Iwata H, Ishiguro N, Habuchi O, Miura T. Low-selenium diet, bone, and articular carti-
- 52 lage in rats. *Nutrition* 1994;10:538-43.
- 53
- 54
- 55
- 56
- 57
- 58
- 59
- 60

1  
2  
3  
4  
5  
6  
7  
8  
9  
10  
11  
12  
13  
14  
15  
16  
17  
18  
19  
20  
21  
22  
23  
24  
25  
26  
27  
28  
29  
30  
31  
32  
33  
34  
35  
36  
37  
38  
39  
40  
41  
42  
43  
44  
45  
46  
47  
48  
49  
50  
51  
52  
53  
54  
55  
56  
57  
58  
59  
60

46. Goss AN, Sampson WJ, Townsend GC, McIntosh GH. Effect of iodine deficiency on craniofacial growth in young common marmosets (*Callithrix jacchus*). *J Craniofac Genet Dev Biol* 1988;8:225-33.

For peer review only

## Figure Legends

### Fig 1 Flow diagram of included study

### Fig 2 Network of eligible comparisons for treatment efficacy network meta-analysis for KBD

The width of lines is proportional to the number of studies compared in every pair of treatments, and the size of nodes is proportional to the total sample size of each treatment. Two-arm study n=11; Three-arm study n=3 (Cui 1984<sup>25</sup>, Guo 1986<sup>28</sup>, Chen 2003<sup>35</sup>); Four-arm study n=1 (Zhou 1991<sup>31</sup>)  
OR = Odds ratio, CI = Confidence intervals, Se = Sodium selenite, Se salt = selenium salt, VC = vitamin C, Se + VC = the combination of sodium selenite with vitamin C; Se + VE = the combination of sodium selenite with vitamin E, Se yeast = selenium enriched yeast.

### Fig 3 Network estimates of mean ORs, their 95% confidence intervals and 95% prediction intervals (red extensions)

OR = Odds ratio, CI = Confidence intervals, PrI = prediction intervals, Se = Sodium selenite, Se salt = selenium salt, VC = vitamin C, Se + VC = the combination of sodium selenite with vitamin C; Se + VE = the combination of sodium selenite with vitamin E, Se yeast = selenium enriched yeast.

### Fig 4 Consistency test in the network Meta-analysis

IF= inconsistency factor, OR = Odds ratio, CI = Confidence intervals, Se = Sodium selenite, Se salt = selenium salt, VC = vitamin C, Se + VC = the combination of sodium selenite with vitamin C; Se + VE = the combination of sodium selenite with vitamin E, Se yeast = selenium enriched yeast.

The x-axis is Log OR, and the vertical line is 0. IF is the absolute inconsistency factor, meaning the logarithm of the ratio of odds ratios (RoR) of direct and indirect evidence for each comparison loop. The absolute inconsistency factor values and confidence intervals are truncated at zero indicate no significant difference of inconsistency.

### Fig 5 SUCRA for the cumulative probabilities

SUCRA=surface under cumulative ranking

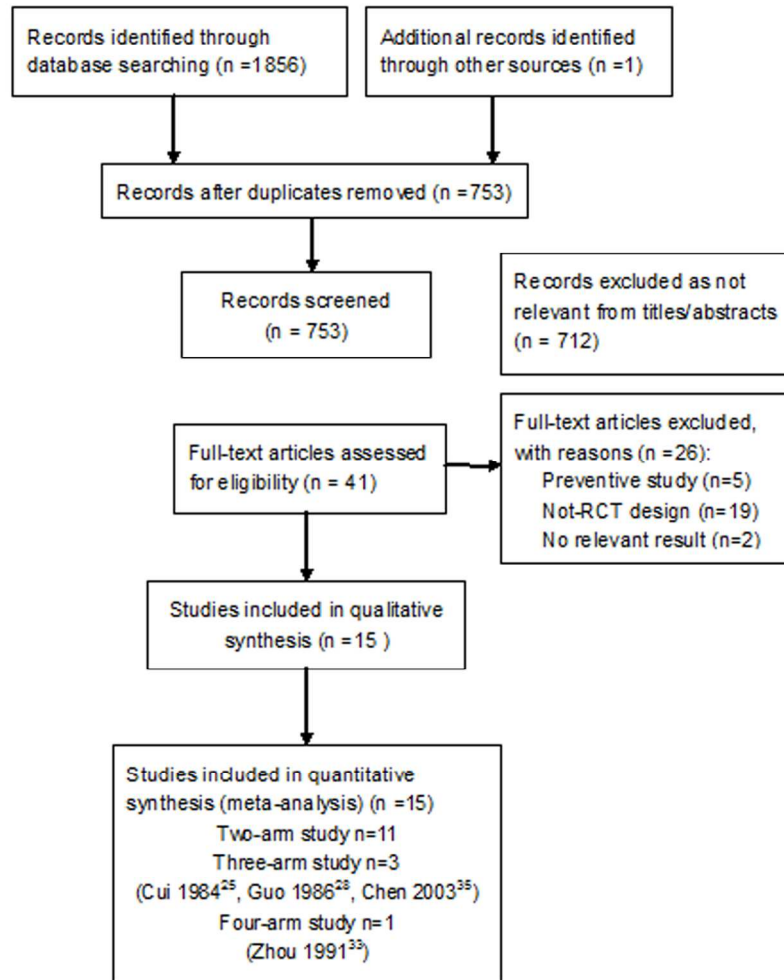

Fig 1 Flow diagram of included study

139x159mm (300 x 300 DPI)

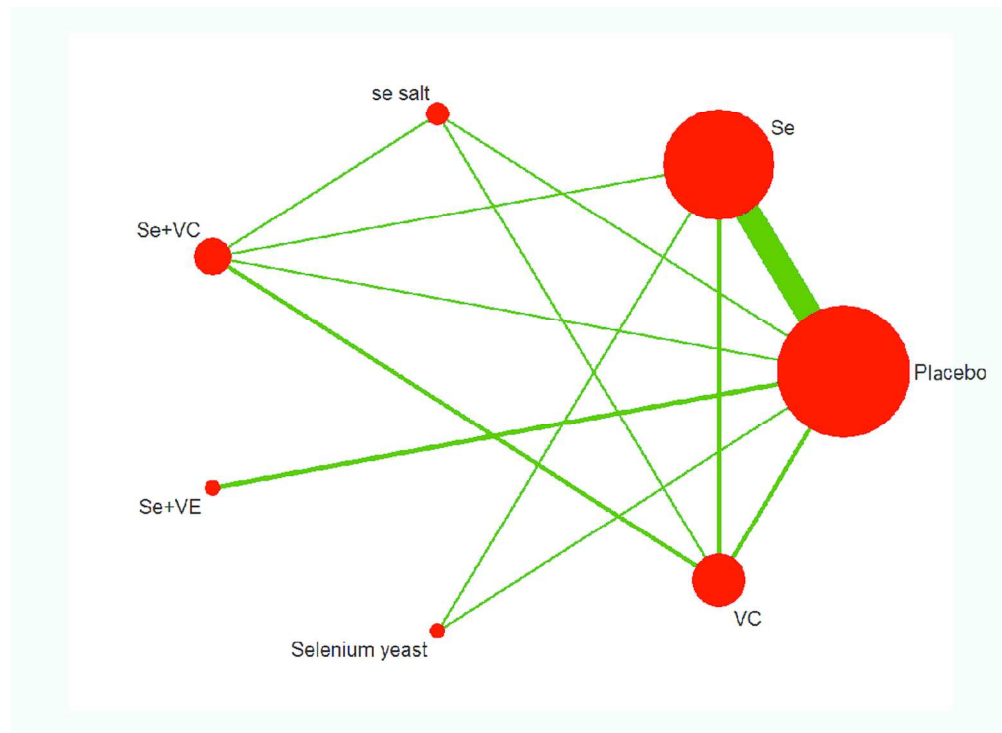

Fig 2 Network of eligible comparisons for treatment efficacy network meta-analysis for KBD. The width of lines is proportional to the number of studies compared in every pair of treatments, and the size of nodes is proportional to the total sample size of each treatment. Two-arm study  $n=11$ ; Three-arm study  $n=3$  (Cui 1984, Guo 1986, Chen 2003); Four-arm study  $n=1$  (Zhou 1991)<sub>T</sub>. OR = Odds ratio, CI = Confidence intervals, Se = Sodium selenite, Se salt = selenium salt, VC = vitamin C, Se + VC = the combination of sodium selenite with vitamin C ; Se + VE = the combination of sodium selenite with vitamin E, Se yeast = selenium enriched yeast.

381x277mm (300 x 300 DPI)



Fig 3 Network estimates of mean ORs, their 95% confidence intervals and 95% prediction in-tervals (red extensions)<sup>†</sup>. OR = Odds ratio, CI = Confidence intervals, PrI = prediction intervals, Se = Sodium selenite, Se salt = selenium salt, VC = vitamin C, Se + VC = the combination of sodium selenite with vitamin C; Se + VE = the combination of sodium selenite with vitamin E, Se yeast = selenium enriched yeast.<sup>†</sup>

454x330mm (300 x 300 DPI)

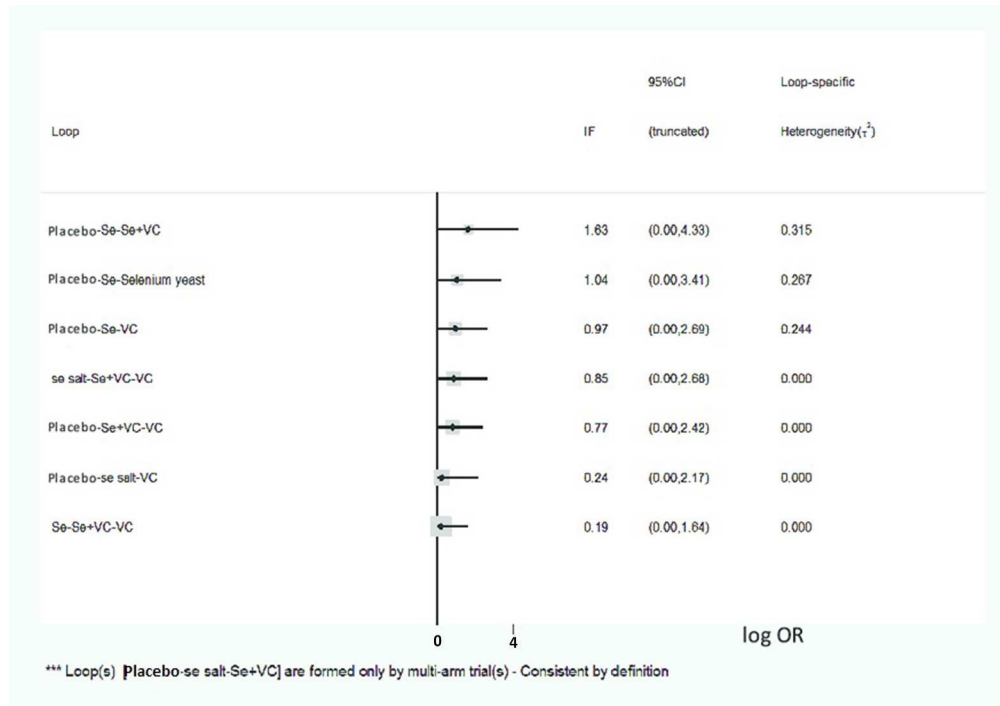

Fig 4 Consistency test in the network Meta-analysis. † IF= inconsistency factor, OR = Odds ratio, CI = Confidence intervals, Se = Sodium selenite, Se salt = selenium salt, VC = vitamin C, Se + VC = the combination of sodium selenite with vitamin C; Se + VE = the combination of sodium selenite with vitamin E, Se yeast = selenium enriched yeast.† The x-axis is Log OR, and the vertical line is 0. IF is the absolute inconsistency factor, meaning the logarithm of the ratio of odds ratios (RoR) of direct and indirect evidence for each comparison loop. The absolute inconsistency factor values and confidence intervals are truncated at zero indicate no significant difference of inconsistency.†

308x217mm (300 x 300 DPI)

1  
2  
3  
4  
5  
6  
7  
8  
9  
10  
11  
12  
13  
14  
15  
16  
17  
18  
19  
20  
21  
22  
23  
24  
25  
26  
27  
28  
29  
30  
31  
32  
33  
34  
35  
36  
37  
38  
39  
40  
41  
42  
43  
44  
45  
46  
47  
48  
49  
50  
51  
52  
53  
54  
55  
56  
57  
58  
59  
60



Fig 5 SUCRA for the cumulative probabilities† . SUCRA=surface under cumulative ranking†

450x328mm (300 x 300 DPI)

Pre-view only



**Appendix box 1 Ovid search strategy**

#1 exp kashin-beck disease/  
#2 kashin-beck disease.tw.  
#3 kashin-bek disease.tw.  
#4 big bone disease.tw.  
#5 endemic osteoarthritis.tw.  
#6 Urov disease.tw.  
#7 1 or 2 or 3 or 4 or 5 or 6  
#8 sodium selenite.tw.  
#9 selenium .tw.  
#10 Se salt.tw.  
#11 enriched yeast  
#12 8 or 9 or 10 or 11  
#13 7 AND 12  
#14 randomized controlled trial.pt.  
#15 controlled clinical trial.pt.  
#16 randmoized.ab.  
#17 placebo.ab.  
#18 randomly.ab.  
#19 trial.ab.  
#20 groups.ab.  
#21 14 or 15 or 16 or 17 or 18 or 19 or 20  
#22 13 and 21  
#23 limit #22 to human

**Appendix table 1 Characteristics of excluded studies(ordered by study ID)**

| <b>Study</b> | <b>Reason for exclusion</b> |
|--------------|-----------------------------|
| Ding 1985    | No relevant result          |
| Fan 1986     | Not a RCT                   |
| Guo 1990     | Not a RCT                   |
| Han 2013     | Not a RCT                   |
| He 1988      | Not a RCT                   |
| Huang 1959   | Not a RCT                   |
| Li 1986      | Not a RCT                   |
| Li 2004      | Preventive study            |
| Liang 1986   | Preventive study            |
| Ma 1996      | Not a RCT                   |
| Sun 2008     | Not a RCT                   |
| Suolang 2008 | Not a RCT                   |
| Wang 1983    | Preventive study            |
| Wang 1988    | Not a RCT                   |
| Wang 1989    | Preventive study            |
| Wu 1991      | Preventive study            |
| Yang 2009    | Not a RCT                   |
| Yang 2010    | Not a RCT                   |
| Yi 2006      | Not a RCT                   |
| Yu 2016      | Not a RCT                   |
| Zhang 1989   | Not a RCT                   |
| Zhang 1996   | No relevant result          |
| Zhang 2006   | Not a RCT                   |
| Zhang 2009   | Not a RCT                   |
| Zhong 1986   | Not a RCT                   |
| Zhou 1998    | Not a RCT                   |

Appendix table 2 Characteristics of included trials

| Study                   | Case No. |       | Age  |      | Intervention                                                                                                              | Control                                  | Follow-up (months) | Outcome                                                                                                              |
|-------------------------|----------|-------|------|------|---------------------------------------------------------------------------------------------------------------------------|------------------------------------------|--------------------|----------------------------------------------------------------------------------------------------------------------|
|                         | I        | C     | I    | C    |                                                                                                                           |                                          |                    |                                                                                                                      |
| Niu 1981 <sup>22</sup>  | 27       | 29    | 6~13 | 6~13 | Se + VE: Se tablet 2mg/week +VE 15mg/day                                                                                  | Placebo/week                             | 12                 | Improvement of metaphyseal lesions on X-ray                                                                          |
| YSSG 1982 <sup>23</sup> | 166      | 159   | 3~13 | 3~13 | Se tablet, 1 mg/week (3-10 yrs), 2 mg/week (11-13 yrs)                                                                    | Placebo/week                             | 12                 | Improvement of metaphyseal lesions on X-ray                                                                          |
| Wang 1983 <sup>24</sup> | 47       | 42    | 5~15 | 5~15 | Se + VC: Se tablet 2mg/week +VE 15mg/day                                                                                  | No treatment                             | 11                 | Improvement of metaphyseal lesions on X-ray                                                                          |
| Cui 1984 <sup>25*</sup> | 30       | 30/30 | 7~19 | 7~19 | Se tablet, 1 mg/week (7-10 yrs), 2 mg/week (11-19 yrs)                                                                    | ①VC 200 mg 3 times/day;<br>②Placebo/week | 6~12               | Improvement of metaphyseal lesions on X-ray                                                                          |
| Niu 1984 <sup>26</sup>  | 56       | 59    | 6~13 | 6~13 | Se tablet first week: 1.0 mg/day (< 10 yrs), 2.0 mg/day (> 11 yrs); after: 1.0 mg/week (< 10 yrs), 2.0 mg/week (> 11 yrs) | Placebo/week                             | 24                 | Improvement of metaphyseal lesions on X-ray<br>Repairing rate at the distal end of phalanges in hands on X-ray films |
| Guo 1985 <sup>27</sup>  | 50       | 50    | 5~15 | 5~15 | Se tablet, 1 mg/week (<5 yrs), 2 mg/week (>5 yrs)                                                                         | Placebo/week                             | 12                 | Improvement of metaphyseal lesions on X-ray                                                                          |

| Study                   | Case No. |     | Age  |      | Intervention                                                                                                | Control      | Follow-up (months) | Outcome                                                                                                              |  |
|-------------------------|----------|-----|------|------|-------------------------------------------------------------------------------------------------------------|--------------|--------------------|----------------------------------------------------------------------------------------------------------------------|--|
|                         | I        | C   | I    | C    |                                                                                                             |              |                    |                                                                                                                      |  |
| Guo 1986 <sup>28*</sup> | 60/60    | 60  | 5~14 | 5~14 | ①Se tablet, 0.5mg/week (<7 yrs), 1 mg/week (>8 yrs);<br>②Se yeast, 0.5mg/week (<7 yrs), 1 mg/week (>8 yrs); | Placebo/week | 13                 | Improvement of metaphyseal lesions on X-ray                                                                          |  |
| Niu 1986 <sup>29</sup>  | 285      | 277 | 6~13 | 6~13 | Se tablet, 1 mg/week (<10 yrs), 2 mg/week (>10 yrs)                                                         | Placebo/week | 12~24              | Improvement of metaphyseal lesions on X-ray<br>Repairing rate at the distal end of phalanges in hands on X-ray films |  |
| Wu 1986 <sup>30</sup>   | 171      | 177 | 5~16 | 5~16 | Se tablet, 1 mg/week (< 10 yrs), 2 mg/week (> 10 yrs)                                                       | Placebo/week | 12                 | Improvement of metaphyseal lesions on X-ray                                                                          |  |
| Deng 1988 <sup>31</sup> | 43       | 46  | 2~13 | 2~13 | Se tablet, no details                                                                                       | No treatment | 36                 | Improvement of metaphyseal lesions on X-ray<br>Repairing rate at the distal end of phalanges in hands on X-ray films |  |

1  
2  
3  
4  
5  
6  
7  
8  
9  
10  
11  
12  
13  
14  
15  
16  
17  
18  
19  
20  
21  
22  
23  
24  
25  
26  
27  
28  
29  
30  
31  
32  
33  
34  
35  
36  
37  
38  
39  
40  
41  
42  
43  
44  
45  
46

| Study                           | Case No. |       | Age     |        | Intervention                                                                                                                                                               | Control                          | Follow-up (months) | Outcome                                                                                                              |             |
|---------------------------------|----------|-------|---------|--------|----------------------------------------------------------------------------------------------------------------------------------------------------------------------------|----------------------------------|--------------------|----------------------------------------------------------------------------------------------------------------------|-------------|
|                                 | I        | C     | I       | C      |                                                                                                                                                                            |                                  |                    |                                                                                                                      |             |
| Niu 1990 <sup>32</sup>          | 210      | 228   | 6~13    | 6~13   | Se tablet, first week: 0.5 mg/day (< 5 yrs), 1.0 mg/day (6-10 yrs), 2.0 mg/day (> 11 yrs); after: 1.0 mg/month (< 5 yrs), 2.0 mg/month (6-10 yrs), 4.0 mg/month (> 11 yrs) | Placebo/month                    | 12                 | Improvement of metaphyseal lesions on X-ray                                                                          | metaphyseal |
| Zhou 1991 <sup>33#</sup>        | 25/30    | 35/29 | 4~12    | 4~12   | ①Se + VC: Se tablet 1mg/10day+ VC 100mg/day;<br>②Se salt (sodium selenite: salt = 1:60,000) /10day                                                                         | ③VC, 300mg/day;<br>④No treatment | 12                 | Improvement of metaphyseal lesions on X-ray                                                                          | metaphyseal |
| Moreno-Reyes 2003 <sup>34</sup> | 113      | 95    | 10±0.28 | 10±0.3 | Se tablet, 1 mg/week                                                                                                                                                       | Placebo/week                     | 12                 | Improvement of metaphyseal lesions on X-ray<br>Repairing rate at the distal end of phalanges in hands on X-ray films | metaphyseal |
| Chen 2003 <sup>35*</sup>        | 50/50    | 50    | 6~11    | 6~11   | ①Se tablet 1mg/week;<br>② Se + VC: Se tablet 1mg/week+ VC 300 mg 2 times/day                                                                                               | VC 300mg bid                     | 12                 | Improvement of metaphyseal lesions on X-ray                                                                          | metaphyseal |

1  
2  
3  
4  
5  
6  
7  
8  
9  
10  
11  
12  
13  
14  
15  
16  
17  
18  
19  
20  
21  
22  
23  
24  
25  
26  
27  
28  
29  
30  
31  
32  
33  
34  
35  
36  
37  
38  
39  
40  
41  
42  
43  
44  
45  
46

| Study                  | Case No. |    | Age  |      | Intervention                                                   | Control      | Follow-up (months) | Outcome                                                                                                              |
|------------------------|----------|----|------|------|----------------------------------------------------------------|--------------|--------------------|----------------------------------------------------------------------------------------------------------------------|
|                        | I        | C  | I    | C    |                                                                |              |                    |                                                                                                                      |
| Cai 2005 <sup>36</sup> | 31       | 31 | 7~13 | 7~13 | Se tablet, 2mg/10 days (7-10 yrs),<br>3 mg/10 days (11-13 yrs) | No treatment | 18                 | Improvement of metaphyseal lesions on X-ray<br>Repairing rate at the distal end of phalanges in hands on X-ray films |

I= intervention, C = control, YSSG = Yongshou scientific survey group of Kashin-Beck Disease, yrs = years, Se = Sodium selenite, Se salt =selenium salt, VC = vitamin C, Se + VC = the combination of sodium selenite with vitamin C ; Se + VE = the combination of sodium selenite with vitamin E, Se yeast = selenium enriched yeast. \* Three arms study, # Four arms study

**Appendix table 3 Risk of Bias of Included Studies**

| Study                   | Balanced allocation | Allocation concealment | Blinding     | Completeness of outcome | Selective outcome reporting | Other Bias            | overall assessment* |
|-------------------------|---------------------|------------------------|--------------|-------------------------|-----------------------------|-----------------------|---------------------|
| Niu 1981 <sup>22</sup>  | Unclear             | Unclear                | Double-blind | Low                     | Low                         | Low                   | Unclear             |
| YSSG 1982 <sup>23</sup> | Unclear             | Unclear                | Double-blind | Low, No dropout         | Low                         | Low                   | Unclear             |
| Wang 1983 <sup>24</sup> | unclear             | unclear                | Double-blind | High, dropouts >20%     | Low                         | High, no ITT analysis | High                |
| Cui 1984 <sup>25</sup>  | unclear             | unclear                | Double-blind | High, dropouts >20%     | Low                         | High, no ITT analysis | High                |
| Niu 1984 <sup>26</sup>  | Unclear             | Unclear                | Double-blind | Low, No dropout         | Low                         | High, no ITT analysis | High                |
| Guo 1985 <sup>27</sup>  | Unclear             | Unclear                | Not Used     | High, dropouts >20%     | Low                         | High, no ITT analysis | High                |
| Guo 1986 <sup>28</sup>  | Unclear             | Unclear                | Unclear      | High, dropouts >20%     | Low                         | High, no ITT analysis | High                |
| Niu 1986 <sup>29</sup>  | Unclear             | Unclear                | Double-blind | Low, No dropout         | Low                         | Low                   | Unclear             |

|    |                                 |         |         |              |                           |     |                       |         |
|----|---------------------------------|---------|---------|--------------|---------------------------|-----|-----------------------|---------|
| 1  |                                 |         |         |              |                           |     |                       |         |
| 2  |                                 |         |         |              |                           |     |                       |         |
| 3  | Wu 1986 <sup>30</sup>           | Unclear | Unclear | Double-blind | Unclear, No dropout < 20% | Low | High, no ITT analysis | High    |
| 4  |                                 |         |         |              |                           |     |                       |         |
| 5  |                                 |         |         |              |                           |     |                       |         |
| 6  |                                 |         |         |              |                           |     |                       |         |
| 7  |                                 |         |         |              |                           |     |                       |         |
| 8  | Deng 1988 <sup>31</sup>         | Unclear | Unclear | Unclear      | Low, drop out <10%        | Low | High, no ITT analysis | High    |
| 9  |                                 |         |         |              |                           |     |                       |         |
| 10 |                                 |         |         |              |                           |     |                       |         |
| 11 |                                 |         |         |              |                           |     |                       |         |
| 12 | Niu 1990 <sup>32</sup>          | Unclear | Unclear | Single-blind | Low, No dropout           | Low | Low                   | Unclear |
| 13 |                                 |         |         |              |                           |     |                       |         |
| 14 |                                 |         |         |              |                           |     |                       |         |
| 15 | Zhou 1991 <sup>33</sup>         | Unclear | Unclear | Unclear      | Low, No dropout           | Low | Low                   | Unclear |
| 16 |                                 |         |         |              |                           |     |                       |         |
| 17 |                                 |         |         |              |                           |     |                       |         |
| 18 | Moreno-Reyes 2003 <sup>34</sup> | Unclear | Unclear | Double-blind | Unclear, No dropout < 20% | Low | High no ITT analysis  | High    |
| 19 |                                 |         |         |              |                           |     |                       |         |
| 20 | Chen 2003 <sup>35</sup>         | Unclear | Unclear | Unclear      | High, dropouts >20%       | Low | High, no ITT analysis | High    |
| 21 |                                 |         |         |              |                           |     |                       |         |
| 22 |                                 |         |         |              |                           |     |                       |         |
| 23 |                                 |         |         |              |                           |     |                       |         |
| 24 |                                 |         |         |              |                           |     |                       |         |
| 25 |                                 |         |         |              |                           |     |                       |         |
| 26 | Cai 2005 <sup>36</sup>          | Unclear | Unclear | Not Used     | Low, No dropout           | Low | Low                   | Unclear |
| 27 |                                 |         |         |              |                           |     |                       |         |
| 28 |                                 |         |         |              |                           |     |                       |         |

---

29 \*: Overall Score: Low risk of bias = no bias detected in any domain; Unclear risk of bias = one category or more is potentially at risk of bias; High risk of bias = one  
30 category or more is at high risk of bias.

31 ITT = intention to treat



Appendix table 4 Data from included studies

| Author                          | Treatment | Group 1  |           | Group 2   |          |           | Group 3   |          |           | Group 4   |          |           |
|---------------------------------|-----------|----------|-----------|-----------|----------|-----------|-----------|----------|-----------|-----------|----------|-----------|
|                                 |           | Case No. | Total No. | Treatment | Case No. | Total No. | Treatment | Case No. | Total No. | Treatment | Case No. | Total No. |
| Niu 1981 <sup>22</sup>          | Se +VE    | 24       | 27        | Placebo   | 7        | 29        |           |          |           |           |          |           |
| YSSG 1982 <sup>23</sup>         | Se        | 136      | 166       | Placebo   | 63       | 159       |           |          |           |           |          |           |
| Wang 1983 <sup>24</sup>         | Se+VE     | 42       | 47        | Placebo   | 25       | 42        |           |          |           |           |          |           |
| Cui 1984 <sup>25</sup>          | Se        | 14       | 30        | VC        | 16       | 30        | Placebo   | 10       | 30        |           |          |           |
| Niu 1984 <sup>26</sup>          | Se        | 54       | 56        | Placebo   | 36       | 59        |           |          |           |           |          |           |
| Guo 1985 <sup>27</sup>          | Se        | 27       | 50        | Placebo   | 5        | 50        |           |          |           |           |          |           |
| Guo 1986 <sup>28</sup>          | Se        | 33       | 60        | Se yeast  | 42       | 60        | Placebo   | 23       | 60        |           |          |           |
| Niu 1986 <sup>29</sup>          | Se        | 245      | 285       | Placebo   | 170      | 277       |           |          |           |           |          |           |
| Wu 1986 <sup>30</sup>           | Se        | 111      | 171       | Placebo   | 45       | 177       |           |          |           |           |          |           |
| Deng 1988 <sup>31</sup>         | Se        | 35       | 43        | Placebo   | 33       | 46        |           |          |           |           |          |           |
| Niu 1990 <sup>32</sup>          | Se        | 190      | 210       | Placebo   | 121      | 228       |           |          |           |           |          |           |
| Zhou 1991 <sup>33</sup>         | Se salt   | 24       | 30        | VC        | 17       | 35        | Se+ VC    | 10       | 25        | Placebo   | 10       | 29        |
| Moreno-Reyes 2003 <sup>34</sup> | Se        | 1        | 113       | Placebo   | 0        | 95        |           |          |           |           |          |           |
| Chen 2003 <sup>35</sup>         | Se        | 30       | 50        | VC        | 27       | 50        | Placebo   | 33       | 50        |           |          |           |
| Cai 2005 <sup>36</sup>          | Se        | 31       | 31        | Placebo   | 5        | 31        |           |          |           |           |          |           |

Se = Sodium selenite, Se salt =selenium salt, VC = vitamin C, Se + VC = the combination of sodium selenite with vitamin C ; Se + VE = the combination of sodium selenite with vitamin E, Se yeast = selenium enriched yeast.

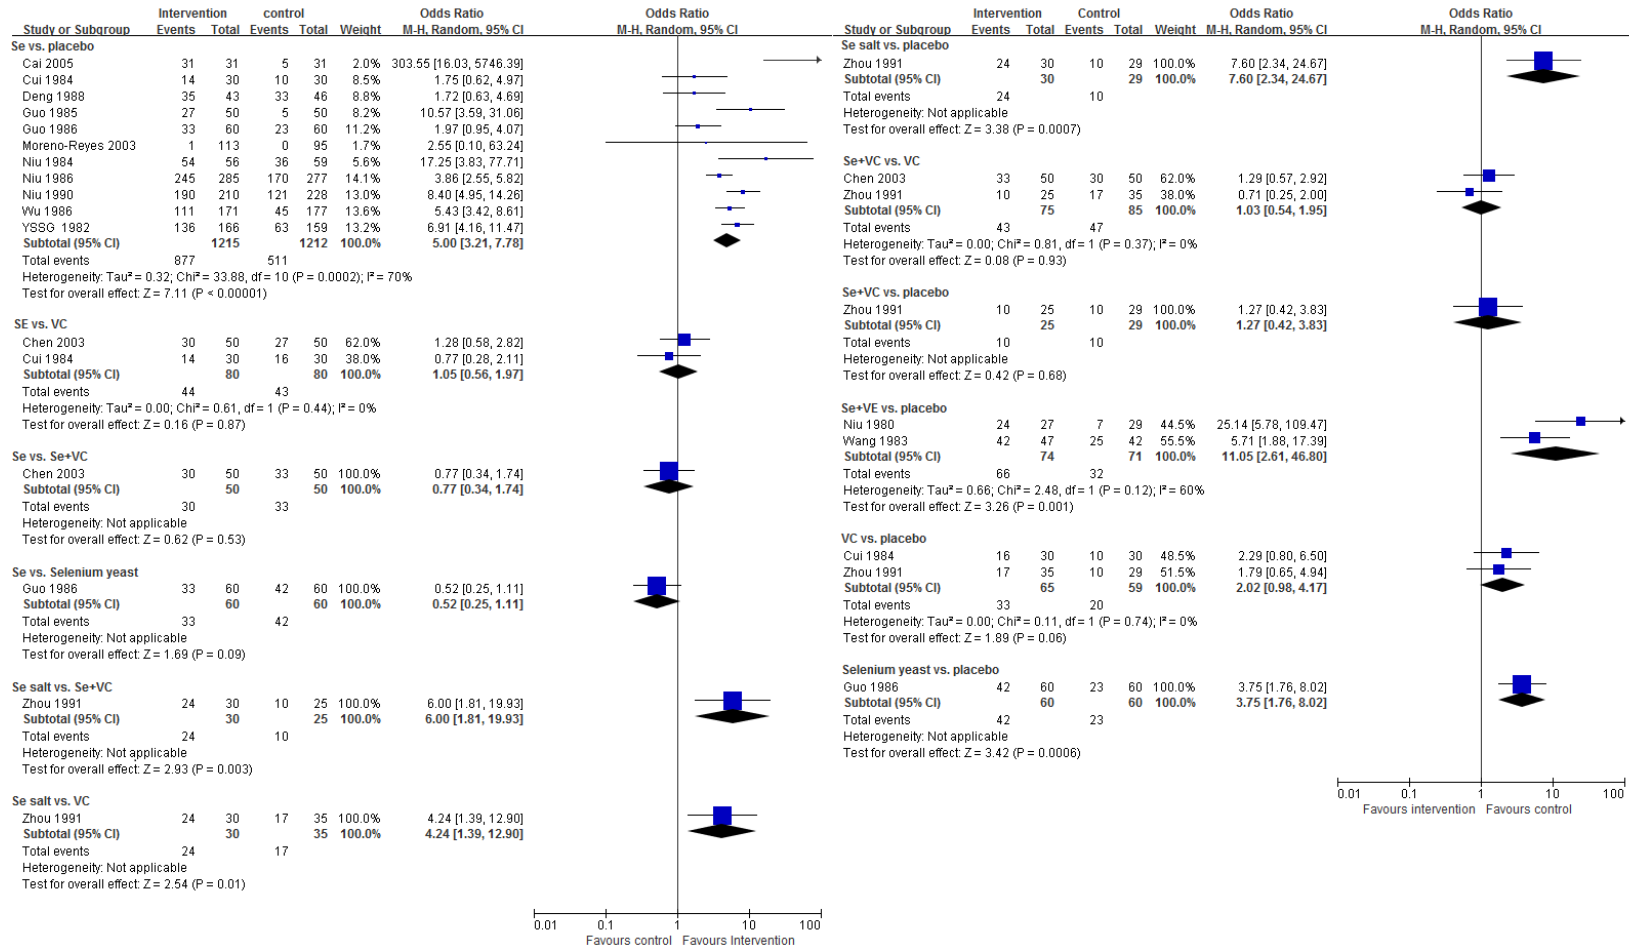

Appendix figure: Forest plot for intervention-control pairwise meta-analyses of repairing rate of metaphyseal lesions on X-ray films.

**PRISMA NMA Checklist of Items to Include When Reporting A Systematic Review Involving a Network Meta-analysis**

| Section/Topic             | Item # | Checklist Item                                                                                                                                                                                                                                                                                                                                                                                                                                                                                                                                                                                                                                                                                                                                                                          | Reported on Page #                               |
|---------------------------|--------|-----------------------------------------------------------------------------------------------------------------------------------------------------------------------------------------------------------------------------------------------------------------------------------------------------------------------------------------------------------------------------------------------------------------------------------------------------------------------------------------------------------------------------------------------------------------------------------------------------------------------------------------------------------------------------------------------------------------------------------------------------------------------------------------|--------------------------------------------------|
| <b>TITLE</b>              |        |                                                                                                                                                                                                                                                                                                                                                                                                                                                                                                                                                                                                                                                                                                                                                                                         |                                                  |
| Title                     | 1      | Identify the report as a systematic review <i>incorporating a network meta-analysis (or related form of meta-analysis)</i> .                                                                                                                                                                                                                                                                                                                                                                                                                                                                                                                                                                                                                                                            | Page 1                                           |
| <b>ABSTRACT</b>           |        |                                                                                                                                                                                                                                                                                                                                                                                                                                                                                                                                                                                                                                                                                                                                                                                         |                                                  |
| Structured summary        | 2      | Provide a structured summary including, as applicable:<br><b>Background:</b> main objectives<br><b>Methods:</b> data sources; study eligibility criteria, participants, and interventions; study appraisal; and <i>synthesis methods, such as network meta-analysis</i> .<br><b>Results:</b> number of studies and participants identified; summary estimates with corresponding confidence/credible intervals; <i>treatment rankings may also be discussed. Authors may choose to summarize pairwise comparisons against a chosen treatment included in their analyses for brevity.</i><br><b>Discussion/Conclusions:</b> limitations; conclusions and implications of findings.<br><b>Other:</b> primary source of funding; systematic review registration number with registry name. | Page 3                                           |
| <b>INTRODUCTION</b>       |        |                                                                                                                                                                                                                                                                                                                                                                                                                                                                                                                                                                                                                                                                                                                                                                                         |                                                  |
| Rationale                 | 3      | Describe the rationale for the review in the context of what is already known, <i>including mention of why a network meta-analysis has been conducted</i> .                                                                                                                                                                                                                                                                                                                                                                                                                                                                                                                                                                                                                             | Page 5                                           |
| Objectives                | 4      | Provide an explicit statement of questions being addressed, with reference to participants, interventions, comparisons, outcomes, and study design (PICOS).                                                                                                                                                                                                                                                                                                                                                                                                                                                                                                                                                                                                                             | Page 6                                           |
| <b>METHODS</b>            |        |                                                                                                                                                                                                                                                                                                                                                                                                                                                                                                                                                                                                                                                                                                                                                                                         |                                                  |
| Protocol and registration | 5      | Indicate whether a review protocol exists and if and where it can be accessed (e.g., Web address); and, if available, provide registration information, including registration number.                                                                                                                                                                                                                                                                                                                                                                                                                                                                                                                                                                                                  | Page 6<br>Registration number:<br>CRD42016051874 |
| Eligibility criteria      | 6      | Specify study characteristics (e.g., PICOS, length of follow-up) and report characteristics (e.g., years considered, language, publication status) used as criteria for eligibility, giving rationale. <i>Clearly describe eligible treatments included in the treatment network, and note whether any have been clustered or merged into the same node (with justification)</i> .                                                                                                                                                                                                                                                                                                                                                                                                      | Page 6-7                                         |
| Information sources       | 7      | Describe all information sources (e.g., databases with dates of coverage, contact with study authors to identify additional studies) in the search and date last searched.                                                                                                                                                                                                                                                                                                                                                                                                                                                                                                                                                                                                              | Page 6                                           |

|    |                                        |           |                                                                                                                                                                                                                                                                                                                                                                                                                                                   |                |
|----|----------------------------------------|-----------|---------------------------------------------------------------------------------------------------------------------------------------------------------------------------------------------------------------------------------------------------------------------------------------------------------------------------------------------------------------------------------------------------------------------------------------------------|----------------|
| 1  | Search                                 | 8         | Present full electronic search strategy for at least one database, including any limits used, such that it could be repeated.                                                                                                                                                                                                                                                                                                                     | Page 6         |
| 2  |                                        |           |                                                                                                                                                                                                                                                                                                                                                                                                                                                   |                |
| 3  |                                        |           |                                                                                                                                                                                                                                                                                                                                                                                                                                                   |                |
| 4  | Study selection                        | 9         | State the process for selecting studies (i.e., screening, eligibility, included in systematic review, and, if applicable, included in the meta-analysis).                                                                                                                                                                                                                                                                                         | Page 7         |
| 5  |                                        |           |                                                                                                                                                                                                                                                                                                                                                                                                                                                   |                |
| 6  |                                        |           |                                                                                                                                                                                                                                                                                                                                                                                                                                                   |                |
| 7  | Data collection process                | 10        | Describe method of data extraction from reports (e.g., piloted forms, independently, in duplicate) and any processes for obtaining and confirming data from investigators.                                                                                                                                                                                                                                                                        | Page 7         |
| 8  |                                        |           |                                                                                                                                                                                                                                                                                                                                                                                                                                                   |                |
| 9  |                                        |           |                                                                                                                                                                                                                                                                                                                                                                                                                                                   |                |
| 10 |                                        |           |                                                                                                                                                                                                                                                                                                                                                                                                                                                   |                |
| 11 | Data items                             | 11        | List and define all variables for which data were sought (e.g., PICOS, funding sources) and any assumptions and simplifications made.                                                                                                                                                                                                                                                                                                             | Page 6-8       |
| 12 |                                        |           |                                                                                                                                                                                                                                                                                                                                                                                                                                                   |                |
| 13 |                                        |           |                                                                                                                                                                                                                                                                                                                                                                                                                                                   |                |
| 14 | <b>Geometry of the network</b>         | <b>S1</b> | Describe methods used to explore the geometry of the treatment network under study and potential biases related to it. This should include how the evidence base has been graphically summarized for presentation, and what characteristics were compiled and used to describe the evidence base to readers.                                                                                                                                      | Page 9 & Fig 2 |
| 15 |                                        |           |                                                                                                                                                                                                                                                                                                                                                                                                                                                   |                |
| 16 |                                        |           |                                                                                                                                                                                                                                                                                                                                                                                                                                                   |                |
| 17 |                                        |           |                                                                                                                                                                                                                                                                                                                                                                                                                                                   |                |
| 18 |                                        |           |                                                                                                                                                                                                                                                                                                                                                                                                                                                   |                |
| 19 |                                        |           |                                                                                                                                                                                                                                                                                                                                                                                                                                                   |                |
| 20 |                                        |           |                                                                                                                                                                                                                                                                                                                                                                                                                                                   |                |
| 21 | Risk of bias within individual studies | 12        | Describe methods used for assessing risk of bias of individual studies (including specification of whether this was done at the study or outcome level), and how this information is to be used in any data synthesis.                                                                                                                                                                                                                            | Page 10        |
| 22 |                                        |           |                                                                                                                                                                                                                                                                                                                                                                                                                                                   |                |
| 23 |                                        |           |                                                                                                                                                                                                                                                                                                                                                                                                                                                   |                |
| 24 |                                        |           |                                                                                                                                                                                                                                                                                                                                                                                                                                                   |                |
| 25 | Summary measures                       | 13        | State the principal summary measures (e.g., risk ratio, difference in means). <i>Also describe the use of additional summary measures assessed, such as treatment rankings and surface under the cumulative ranking curve (SUCRA) values, as well as modified approaches used to present summary findings from meta-analyses.</i>                                                                                                                 | Page 8-9       |
| 26 |                                        |           |                                                                                                                                                                                                                                                                                                                                                                                                                                                   |                |
| 27 |                                        |           |                                                                                                                                                                                                                                                                                                                                                                                                                                                   |                |
| 28 |                                        |           |                                                                                                                                                                                                                                                                                                                                                                                                                                                   |                |
| 29 |                                        |           |                                                                                                                                                                                                                                                                                                                                                                                                                                                   |                |
| 30 |                                        |           |                                                                                                                                                                                                                                                                                                                                                                                                                                                   |                |
| 31 | Planned methods of analysis            | 14        | Describe the methods of handling data and combining results of studies for each network meta-analysis. This should include, but not be limited to: <ul style="list-style-type: none"> <li>• <i>Handling of multi-arm trials;</i></li> <li>• <i>Selection of variance structure;</i></li> <li>• <i>Selection of prior distributions in Bayesian analyses; and</i></li> <li>• <i>Assessment of model fit.</i></li> </ul>                            | Page 8-9       |
| 32 |                                        |           |                                                                                                                                                                                                                                                                                                                                                                                                                                                   |                |
| 33 |                                        |           |                                                                                                                                                                                                                                                                                                                                                                                                                                                   |                |
| 34 |                                        |           |                                                                                                                                                                                                                                                                                                                                                                                                                                                   |                |
| 35 |                                        |           |                                                                                                                                                                                                                                                                                                                                                                                                                                                   |                |
| 36 |                                        |           |                                                                                                                                                                                                                                                                                                                                                                                                                                                   |                |
| 37 |                                        |           |                                                                                                                                                                                                                                                                                                                                                                                                                                                   |                |
| 38 |                                        |           |                                                                                                                                                                                                                                                                                                                                                                                                                                                   |                |
| 39 |                                        |           |                                                                                                                                                                                                                                                                                                                                                                                                                                                   |                |
| 40 | <b>Assessment of Inconsistency</b>     | <b>S2</b> | Describe the statistical methods used to evaluate the agreement of direct and indirect evidence in the treatment network(s) studied. Describe efforts taken to address its presence when found.                                                                                                                                                                                                                                                   | Page 8-9       |
| 41 |                                        |           |                                                                                                                                                                                                                                                                                                                                                                                                                                                   |                |
| 42 |                                        |           |                                                                                                                                                                                                                                                                                                                                                                                                                                                   |                |
| 43 |                                        |           |                                                                                                                                                                                                                                                                                                                                                                                                                                                   |                |
| 44 | Risk of bias across studies            | 15        | Specify any assessment of risk of bias that may affect the cumulative evidence (e.g., publication bias, selective reporting within studies).                                                                                                                                                                                                                                                                                                      | Page 10        |
| 45 |                                        |           |                                                                                                                                                                                                                                                                                                                                                                                                                                                   |                |
| 46 |                                        |           |                                                                                                                                                                                                                                                                                                                                                                                                                                                   |                |
| 47 | Additional analyses                    | 16        | Describe methods of additional analyses if done, indicating which were pre-specified. This may include, but not be limited to, the following: <ul style="list-style-type: none"> <li>• Sensitivity or subgroup analyses;</li> <li>• Meta-regression analyses;</li> <li>• <i>Alternative formulations of the treatment network; and</i></li> <li>• <i>Use of alternative prior distributions for Bayesian analyses (if applicable).</i></li> </ul> | Page 7-9       |
| 48 |                                        |           |                                                                                                                                                                                                                                                                                                                                                                                                                                                   |                |
| 49 |                                        |           |                                                                                                                                                                                                                                                                                                                                                                                                                                                   |                |
| 50 |                                        |           |                                                                                                                                                                                                                                                                                                                                                                                                                                                   |                |
| 51 |                                        |           |                                                                                                                                                                                                                                                                                                                                                                                                                                                   |                |
| 52 |                                        |           |                                                                                                                                                                                                                                                                                                                                                                                                                                                   |                |
| 53 |                                        |           |                                                                                                                                                                                                                                                                                                                                                                                                                                                   |                |
| 54 |                                        |           |                                                                                                                                                                                                                                                                                                                                                                                                                                                   |                |
| 55 |                                        |           |                                                                                                                                                                                                                                                                                                                                                                                                                                                   |                |
| 56 |                                        |           |                                                                                                                                                                                                                                                                                                                                                                                                                                                   |                |
| 57 |                                        |           |                                                                                                                                                                                                                                                                                                                                                                                                                                                   |                |
| 58 |                                        |           |                                                                                                                                                                                                                                                                                                                                                                                                                                                   |                |
| 59 |                                        |           |                                                                                                                                                                                                                                                                                                                                                                                                                                                   |                |
| 60 |                                        |           |                                                                                                                                                                                                                                                                                                                                                                                                                                                   |                |

## RESULTS†

|                                          |           |                                                                                                                                                                                                                                                                                                                                                                                                                                                              |                                      |
|------------------------------------------|-----------|--------------------------------------------------------------------------------------------------------------------------------------------------------------------------------------------------------------------------------------------------------------------------------------------------------------------------------------------------------------------------------------------------------------------------------------------------------------|--------------------------------------|
| Study selection                          | 17        | Give numbers of studies screened, assessed for eligibility, and included in the review, with reasons for exclusions at each stage, ideally with a flow diagram.                                                                                                                                                                                                                                                                                              | Page 9 & Fig 1                       |
| <b>Presentation of network structure</b> | <b>S3</b> | Provide a network graph of the included studies to enable visualization of the geometry of the treatment network.                                                                                                                                                                                                                                                                                                                                            | Fig 2                                |
| <b>Summary of network geometry</b>       | <b>S4</b> | Provide a brief overview of characteristics of the treatment network. This may include commentary on the abundance of trials and randomized patients for the different interventions and pairwise comparisons in the network, gaps of evidence in the treatment network, and potential biases reflected by the network structure.                                                                                                                            | Page 9                               |
| Study characteristics                    | 18        | For each study, present characteristics for which data were extracted (e.g., study size, PICOS, follow-up period) and provide the citations.                                                                                                                                                                                                                                                                                                                 | Page 10 & Appendix table 2           |
| Risk of bias within studies              | 19        | Present data on risk of bias of each study and, if available, any outcome level assessment.                                                                                                                                                                                                                                                                                                                                                                  | Page 10 & Appendix table 3           |
| Results of individual studies            | 20        | For all outcomes considered (benefits or harms), present, for each study: 1) simple summary data for each intervention group, and 2) effect estimates and confidence intervals. <i>Modified approaches may be needed to deal with information from larger networks.</i>                                                                                                                                                                                      | Page 10-11 & Appendix table 2        |
| Synthesis of results                     | 21        | Present results of each meta-analysis done, including confidence/credible intervals. <i>In larger networks, authors may focus on comparisons versus a particular comparator (e.g. placebo or standard care), with full findings presented in an appendix. League tables and forest plots may be considered to summarize pairwise comparisons.</i> If additional summary measures were explored (such as treatment rankings), these should also be presented. | Page 10-11 & Table 2                 |
| <b>Exploration for inconsistency</b>     | <b>S5</b> | Describe results from investigations of inconsistency. This may include such information as measures of model fit to compare consistency and inconsistency models, <i>P</i> values from statistical tests, or summary of inconsistency estimates from different parts of the treatment network.                                                                                                                                                              | Page 11 & Fig 4                      |
| Risk of bias across studies              | 22        | Present results of any assessment of risk of bias across studies for the evidence base being studied.                                                                                                                                                                                                                                                                                                                                                        | Page 11 & Fig 4                      |
| Results of additional analyses           | 23        | Give results of additional analyses, if done (e.g., sensitivity or subgroup analyses, meta-regression analyses, <i>alternative network geometries studied, alternative choice of prior distributions for Bayesian analyses, and so forth</i> ).                                                                                                                                                                                                              | Page 11<br>Table 4<br>Fig 4<br>Fig 5 |

**DISCUSSION**

|                     |    |                                                                                                                                                                                       |                   |
|---------------------|----|---------------------------------------------------------------------------------------------------------------------------------------------------------------------------------------|-------------------|
| Summary of evidence | 24 | Summarize the main findings, including the strength of evidence for each main outcome; consider their relevance to key groups (e.g., healthcare providers, users, and policy-makers). | <b>Page 11-12</b> |
|---------------------|----|---------------------------------------------------------------------------------------------------------------------------------------------------------------------------------------|-------------------|

|             |    |                                                                                                                                                                                                                                                                                                                                                     |                |
|-------------|----|-----------------------------------------------------------------------------------------------------------------------------------------------------------------------------------------------------------------------------------------------------------------------------------------------------------------------------------------------------|----------------|
| Limitations | 25 | Discuss limitations at study and outcome level (e.g., risk of bias), and at review level (e.g., incomplete retrieval of identified research, reporting bias). <i>Comment on the validity of the assumptions, such as transitivity and consistency. Comment on any concerns regarding network geometry (e.g., avoidance of certain comparisons).</i> | <b>Page 14</b> |
|-------------|----|-----------------------------------------------------------------------------------------------------------------------------------------------------------------------------------------------------------------------------------------------------------------------------------------------------------------------------------------------------|----------------|

|             |    |                                                                                                                         |                   |
|-------------|----|-------------------------------------------------------------------------------------------------------------------------|-------------------|
| Conclusions | 26 | Provide a general interpretation of the results in the context of other evidence, and implications for future research. | <b>Page 15-16</b> |
|-------------|----|-------------------------------------------------------------------------------------------------------------------------|-------------------|

**FUNDING**

|         |    |                                                                                                                                                                                                                                                                                                                                                                                                                                |                |
|---------|----|--------------------------------------------------------------------------------------------------------------------------------------------------------------------------------------------------------------------------------------------------------------------------------------------------------------------------------------------------------------------------------------------------------------------------------|----------------|
| Funding | 27 | Describe sources of funding for the systematic review and other support (e.g., supply of data); role of funders for the systematic review. This should also include information regarding whether funding has been received from manufacturers of treatments in the network and/or whether some of the authors are content experts with professional conflicts of interest that could affect use of treatments in the network. | <b>Page 16</b> |
|---------|----|--------------------------------------------------------------------------------------------------------------------------------------------------------------------------------------------------------------------------------------------------------------------------------------------------------------------------------------------------------------------------------------------------------------------------------|----------------|

PICOS = population, intervention, comparators, outcomes, study design.

\* Text in italics indicates wording specific to reporting of network meta-analyses that has been added to guidance from the PRISMA statement.

† Authors may wish to plan for use of appendices to present all relevant information in full detail for items in this section.
